# Supplementary material for: CRISPLD1: a novel conserved target in the transition to human heart failure
Source: Basic Res Cardiol. 2020 Mar 7;115(3):27. doi: 10.1007/s00395-020-0784-4 (PMC7060963; doi:10.1007/s00395-020-0784-4)
Supplement: Supplementary file 8 — Supplementary file14 (XLSX 1226 kb) [file 395_2020_784_MOESM8_ESM.xlsx]

## Sheet: Perseus Results
DIA_A_KO	DIA_A_WT	DIA_B_KO	DIA_B_WT	DIA_C_KO	DIA_C_WT	Group	Significant	Length	Index	log2 Mean Areas KO	log2 Mean Areas WT	log2 FoldChange (KO/WT)	Accession	ID	Protein names	Gene names	Primary Gene
13.0473	16.4577	11.86	16.6484	13.1952	16.549	sp	+	1354	934	12.7008	16.5517	-3.85085	Q13464	ROCK1_HUMAN	Rho-associated protein kinase 1 (EC 2.7.11.1) (Renal carcinoma antigen NY-REN-35) (Rho-associated, coiled-coil-containing protein kinase 1) (Rho-associated, coiled-coil-containing protein kinase I) (ROCK-I) (p160 ROCK-1) (p160ROCK)	ROCK1	ROCK1
15.9842	18.0151	15.4539	18.0724	14.1254	18.0753	sp	+	79	2525	15.1879	18.0542	-2.86638	P24310	CX7A1_HUMAN	Cytochrome c oxidase subunit 7A1, mitochondrial (Cytochrome c oxidase subunit VIIa-heart) (Cytochrome c oxidase subunit VIIa-H) (Cytochrome c oxidase subunit VIIa-muscle) (Cytochrome c oxidase subunit VIIa-M)	COX7A1 COX7AH	COX7A1
12.3852	14.323	12.2644	14.541	10.2415	14.5789	sp	+	558	2360	11.6304	14.481	-2.8506	O00592	PODXL_HUMAN	Podocalyxin (GCTM-2 antigen) (Gp200) (Podocalyxin-like protein 1) (PC) (PCLP-1)	PODXL PCLP PCLP1	PODXL
11.4319	14.2016	14.1079	15.2188	11.068	15.1807	sp	+	533	2374	12.2026	14.867	-2.66444	P15848	ARSB_HUMAN	Arylsulfatase B (ASB) (EC 3.1.6.12) (N-acetylgalactosamine-4-sulfatase) (G4S)	ARSB	ARSB
14.7943	17.2534	15.7248	17.2798	14.0206	17.2039	sp	+	215	2284	14.8466	17.2457	-2.39916	Q02539	H11_HUMAN	Histone H1.1 (Histone H1a)	HIST1H1A H1F1	HIST1H1A
14.1492	15.8751	12.983	15.8544	13.7413	15.963	sp	+	227	1364	13.6245	15.8975	-2.27302	P80723	BASP1_HUMAN	Brain acid soluble protein 1 (22 kDa neuronal tissue-enriched acidic protein) (Neuronal axonal membrane protein NAP-22)	BASP1 NAP22	BASP1
12.0203	15.64	14.2266	15.8875	14.1996	15.6627	sp	+	1019	1345	13.4822	15.7301	-2.24792	P12110	CO6A2_HUMAN	Collagen alpha-2(VI) chain	COL6A2	COL6A2
13.1864	15.2459	12.9327	15.2119	13.2473	15.3349	sp	+	248	1244	13.1222	15.2642	-2.14204	P67936	TPM4_HUMAN	Tropomyosin alpha-4 chain (TM30p1) (Tropomyosin-4)	TPM4	TPM4
16.2047	19.3148	17.4099	19.3309	17.888	19.2495	sp	+	399	949	17.1675	19.2984	-2.13084	O14958	CASQ2_HUMAN	Calsequestrin-2 (Calsequestrin, cardiac muscle isoform)	CASQ2	CASQ2
15.5938	17.8145	15.6656	17.6934	15.6987	17.818	sp	+	3177	49	15.6527	17.7753	-2.12262	P12111	CO6A3_HUMAN	Collagen alpha-3(VI) chain	COL6A3	COL6A3
17.3131	19.0773	16.6951	19.0654	16.8608	19.022	sp	+	2647	20	16.9563	19.0549	-2.09857	P21333	FLNA_HUMAN	Filamin-A (FLN-A) (Actin-binding protein 280) (ABP-280) (Alpha-filamin) (Endothelial actin-binding protein) (Filamin-1) (Non-muscle filamin)	FLNA FLN FLN1	FLNA
13.6864	16.6902	14.9414	16.7112	15.1495	16.6031	sp	+	376	2494	14.5924	16.6681	-2.0757	P63267	ACTH_HUMAN	Actin, gamma-enteric smooth muscle (Alpha-actin-3) (Gamma-2-actin) (Smooth muscle gamma-actin) [Cleaved into: Actin, gamma-enteric smooth muscle, intermediate form]	ACTG2 ACTA3 ACTL3 ACTSG	ACTG2
13.5382	16.197	14.4771	16.1543	14.3254	16.1805	sp	+	354	1794	14.1135	16.1773	-2.06372	P09471	GNAO_HUMAN	Guanine nucleotide-binding protein G(o) subunit alpha	GNAO1	GNAO1
10.9982	14.5392	13.5799	14.6236	12.3397	13.8515	sp	+	779	1247	12.3059	14.3381	-2.03215	Q969S9	RRF2M_HUMAN	Ribosome-releasing factor 2, mitochondrial (RRF2mt) (Elongation factor G 2, mitochondrial) (EF-G2mt) (mEF-G 2) (Elongation factor G2) (hEFG2)	GFM2 EFG2 MSTP027	GFM2
16.0697	17.9829	15.6626	18.0331	16.2415	18.0071	sp	+	793	445	15.9913	18.0077	-2.01641	Q05682-4	CALD1_HUMAN	Caldesmon (CDM)	CALD1 CAD CDM	CALD1
14.2523	15.9884	13.7096	15.9328	13.9189	15.8631	sp	+	1338	1952	13.9603	15.9281	-1.96786	P17948	VGFR1_HUMAN	Vascular endothelial growth factor receptor 1 (VEGFR-1) (EC 2.7.10.1) (Fms-like tyrosine kinase 1) (FLT-1) (Tyrosine-protein kinase FRT) (Tyrosine-protein kinase receptor FLT) (FLT) (Vascular permeability factor receptor)	FLT1 FLT FRT VEGFR1	FLT1
19.8945	21.889	20.0802	21.865	20.0061	21.8565	sp	+	339	243	19.9936	21.8702	-1.87658	P07355	ANXA2_HUMAN	Annexin A2 (Annexin II) (Annexin-2) (Calpactin I heavy chain) (Calpactin-1 heavy chain) (Chromobindin-8) (Lipocortin II) (Placental anticoagulant protein IV) (PAP-IV) (Protein I) (p36)	ANXA2 ANX2 ANX2L4 CAL1H LPC2D	ANXA2
13.0136	14.9347	12.4061	15.2316	14.2338	15.0875	sp	+	519	1444	13.2178	15.0846	-1.86674	Q14554	PDIA5_HUMAN	Protein disulfide-isomerase A5 (EC 5.3.4.1) (Protein disulfide isomerase-related protein)	PDIA5 PDIR	PDIA5
17.2518	19.0666	16.9698	19.0408	17.3729	19.0496	sp	+	135	1419	17.1982	19.0523	-1.85417	P09382	LEG1_HUMAN	Galectin-1 (Gal-1) (14 kDa laminin-binding protein) (HLBP14) (14 kDa lectin) (Beta-galactoside-binding lectin L-14-I) (Galaptin) (HBL) (HPL) (Lactose-binding lectin 1) (Lectin galactoside-binding soluble 1) (Putative MAPK-activating protein PM12) (S-Lac lectin 1)	LGALS1	LGALS1
10.4488	13.7875	12.7942	13.5058	12.1226	13.548	sp	+	284	1978	11.7886	13.6138	-1.82519	P07951	TPM2_HUMAN	Tropomyosin beta chain (Beta-tropomyosin) (Tropomyosin-2)	TPM2 TMSB	TPM2
11.7267	13.9698	12.1231	13.9186	12.7901	14.1874	sp	+	2201	1280	12.2133	14.0253	-1.81199	P24821	TENA_HUMAN	Tenascin (TN) (Cytotactin) (GMEM) (GP 150-225) (Glioma-associated-extracellular matrix antigen) (Hexabrachion) (JI) (Myotendinous antigen) (Neuronectin) (Tenascin-C) (TN-C)	TNC HXB	TNC
13.2821	14.3923	13.2035	15.6484	14.0693	15.9216	sp	+	411	2540	13.5183	15.3208	-1.80248	Q9UBB5	MBD2_HUMAN	Methyl-CpG-binding domain protein 2 (Demethylase) (DMTase) (Methyl-CpG-binding protein MBD2)	MBD2	MBD2
11.6137	14.3832	12.1146	13.0188	12.8809	14.5806	sp	+	582	1790	12.2031	13.9942	-1.79111	Q9NVV4	PAPD1_HUMAN	Poly(A) RNA polymerase, mitochondrial (PAP) (EC 2.7.7.19) (PAP-associated domain-containing protein 1) (Polynucleotide adenylyltransferase) (Terminal uridylyltransferase 1) (TUTase 1) (mtPAP)	MTPAP PAPD1	MTPAP
17.2348	19.1109	17.2388	19.0888	17.5631	19.1552	sp	+	2386	166	17.3456	19.1183	-1.77276	P02751	FINC_HUMAN	Fibronectin (FN) (Cold-insoluble globulin) (CIG) [Cleaved into: Anastellin;Ugl-Y1;Ugl-Y2;Ugl-Y3]	FN1 FN	FN1
16.1576	17.27	15.579	17.4304	15.0247	17.3538	sp	+	1730	328	15.5871	17.3514	-1.76426	Q86VF7	NRAP_HUMAN	Nebulin-related-anchoring protein (N-RAP)	NRAP	NRAP
13.8712	16.2584	15.8489	16.3211	13.7395	16.1588	tr	+	388	2047	14.4865	16.2461	-1.75956	A0A0C4DGH0	A0A0C4DGH0_HUMAN	CD276 antigen	CD276	CD276
17.849	19.928	18.2972	19.8844	18.3045	19.8686	sp	+	1796	55	18.1503	19.8937	-1.74343	Q05707	COEA1_HUMAN	Collagen alpha-1(XIV) chain (Undulin)	COL14A1 UND	COL14A1
13.4367	16.017	15.1347	15.9636	14.1375	15.8186	sp	+	658	2223	14.2363	15.9331	-1.69674	P17813	EGLN_HUMAN	Endoglin (CD antigen CD105)	ENG END	ENG
15.3012	16.622	15.2889	16.7197	14.4626	16.6489	sp	+	532	1789	15.0176	16.6635	-1.64597	P05362	ICAM1_HUMAN	Intercellular adhesion molecule 1 (ICAM-1) (Major group rhinovirus receptor) (CD antigen CD54)	ICAM1	ICAM1
14.893	16.3524	15.3821	16.3846	13.8623	16.3278	sp	+	738	1222	14.7125	16.3549	-1.64246	P16284	PECA1_HUMAN	Platelet endothelial cell adhesion molecule (PECAM-1) (EndoCAM) (GPIIA') (PECA1) (CD antigen CD31)	PECAM1	PECAM1
15.4004	16.6708	15.3228	16.7637	14.5527	16.7624	sp	+	362	1968	15.092	16.7323	-1.64034	P30488	1B50_HUMAN	HLA class I histocompatibility antigen, B-50 alpha chain (Bw-50) (HLA class I histocompatibility antigen, B-21 alpha chain) (MHC class I antigen B*50)	HLA-B HLAB	HLA-B
13.319	14.4715	11.5298	14.5477	13.1028	13.8533	sp	+	1499	2619	12.6505	14.2908	-1.6403	Q9Y4G8	RPGF2_HUMAN	Rap guanine nucleotide exchange factor 2 (Cyclic nucleotide ras GEF) (CNrasGEF) (Neural RAP guanine nucleotide exchange protein) (nRap GEP) (PDZ domain-containing guanine nucleotide exchange factor 1) (PDZ-GEF1) (RA-GEF-1) (Ras/Rap1-associating GEF-1)	RAPGEF2 KIAA0313 NRAPGEP PDZGEF1	RAPGEF2
14.3001	15.4995	14.3183	15.5655	13.2378	15.6277	sp	+	191	1206	13.9521	15.5643	-1.61221	P62760	VISL1_HUMAN	Visinin-like protein 1 (VILIP) (VLP-1) (Hippocalcin-like protein 3) (HLP3)	VSNL1 VISL1	VSNL1
13.5333	15.1073	13.6991	15.1823	13.4766	15.2163	sp	+	639	2311	13.5697	15.1686	-1.59894	P54652	HSP72_HUMAN	Heat shock-related 70 kDa protein 2 (Heat shock 70 kDa protein 2)	HSPA2	HSPA2
14.2748	16.3244	15.178	16.2972	14.7665	16.3578	sp	+	398	959	14.7398	16.3265	-1.5867	P07093	GDN_HUMAN	Glia-derived nexin (GDN) (Peptidase inhibitor 7) (PI-7) (Protease nexin 1) (PN-1) (Protease nexin I) (Serpin E2)	SERPINE2 PI7 PN1	SERPINE2
14.2648	14.9738	13.4217	15.1256	12.5117	14.824	sp	+	403	1751	13.3994	14.9745	-1.57509	P48728	GCST_HUMAN	Aminomethyltransferase, mitochondrial (EC 2.1.2.10) (Glycine cleavage system T protein) (GCVT)	AMT GCST	AMT
14.1384	15.5022	14.0217	15.5676	13.6007	15.4096	sp	+	87	2526	13.9203	15.4931	-1.57284	Q9NRX3	NUA4L_HUMAN	NADH dehydrogenase [ubiquinone] 1 alpha subcomplex subunit 4-like 2 (NADH-ubiquinone oxidoreductase MLRQ subunit homolog) (NUOMS)	NDUFA4L2	NDUFA4L2
12.0958	13.0215	12.1218	13.2202	10.4555	13.0609	sp	+	1023	2132	11.5577	13.1009	-1.54313	Q24JP5	T132A_HUMAN	Transmembrane protein 132A (HSPA5-binding protein 1)	TMEM132A HSPA5BP1 KIAA1583	TMEM132A
16.5988	18.0024	16.2778	17.9902	16.5413	18.052	sp	+	346	731	16.4726	18.0149	-1.54225	P04083	ANXA1_HUMAN	Annexin A1 (Annexin I) (Annexin-1) (Calpactin II) (Calpactin-2) (Chromobindin-9) (Lipocortin I) (Phospholipase A2 inhibitory protein) (p35)	ANXA1 ANX1 LPC1	ANXA1
15.1502	16.8563	16.1675	16.777	14.6037	16.6751	sp	+	457	1388	15.3071	16.7695	-1.46233	Q9NR12	PDLI7_HUMAN	PDZ and LIM domain protein 7 (LIM mineralization protein) (LMP) (Protein enigma)	PDLIM7 ENIGMA	PDLIM7
13.5777	15.1303	13.9424	15.114	13.671	15.2437	sp	+	368	2676	13.7304	15.1627	-1.4323	P21810	PGS1_HUMAN	Biglycan (Bone/cartilage proteoglycan I) (PG-S1)	BGN SLRR1A	BGN
14.5658	16.2805	15.2177	16.1368	14.5607	16.1744	sp	+	1464	1544	14.7814	16.1972	-1.41588	P02452	CO1A1_HUMAN	Collagen alpha-1(I) chain (Alpha-1 type I collagen)	COL1A1	COL1A1
13.4274	15.898	14.9565	15.7667	14.9468	15.8617	sp	+	303	2033	14.4436	15.8421	-1.39856	Q96DC8	ECHD3_HUMAN	Enoyl-CoA hydratase domain-containing protein 3, mitochondrial	ECHDC3 PP1494 PP8332	ECHDC3
13.367	14.2606	11.9071	14.2938	13.4607	14.3621	sp	+	318	2420	12.9116	14.3055	-1.39385	O15162-2	PLS1_HUMAN	Phospholipid scramblase 1 (PL scramblase 1) (Ca(2+)-dependent phospholipid scramblase 1) (Erythrocyte phospholipid scramblase) (MmTRA1b)	PLSCR1	PLSCR1
15.9592	17.1493	15.6132	17.2038	15.9634	17.2599	sp	+	541	1902	15.8453	17.2043	-1.35903	Q15758	AAAT_HUMAN	Neutral amino acid transporter B(0) (ATB(0)) (Baboon M7 virus receptor) (RD114/simian type D retrovirus receptor) (Sodium-dependent neutral amino acid transporter type 2) (Solute carrier family 1 member 5)	SLC1A5 ASCT2 M7V1 RDR RDRC	SLC1A5
17.5403	18.7013	17.3144	18.7767	17.3297	18.776	sp	+	400	619	17.3948	18.7513	-1.35651	P08727	K1C19_HUMAN	Keratin, type I cytoskeletal 19 (Cytokeratin-19) (CK-19) (Keratin-19) (K19)	KRT19	KRT19
12.7843	14.2311	13.1423	14.2934	13.0388	14.3384	sp	+	222	2191	12.9885	14.2876	-1.29913	Q9Y680	FKBP7_HUMAN	Peptidyl-prolyl cis-trans isomerase FKBP7 (PPIase FKBP7) (EC 5.2.1.8) (23 kDa FK506-binding protein) (23 kDa FKBP) (FKBP-23) (FK506-binding protein 7) (FKBP-7) (Rotamase)	FKBP7 FKBP23 UNQ670/PRO1304	FKBP7
12.5628	14.5468	13.2359	14.2116	13.739	14.6192	sp	+	1479	526	13.1793	14.4592	-1.27993	Q9UBG0	MRC2_HUMAN	C-type mannose receptor 2 (C-type lectin domain family 13 member E) (Endocytic receptor 180) (Macrophage mannose receptor 2) (Urokinase-type plasminogen activator receptor-associated protein) (UPAR-associated protein) (Urokinase receptor-associated protein) (CD antigen CD280)	MRC2 CLEC13E ENDO180 KIAA0709 UPARAP	MRC2
16.7136	17.9044	15.7185	17.8319	16.8549	17.3534	sp	+	555	1530	16.429	17.6966	-1.26759	Q9Y625	GPC6_HUMAN	Glypican-6 [Cleaved into: Secreted glypican-6]	GPC6 UNQ369/PRO705	GPC6
17.0836	18.4896	17.2291	18.5069	17.4289	18.5425	sp	+	1158	542	17.2472	18.513	-1.2658	Q8IUX7	AEBP1_HUMAN	Adipocyte enhancer-binding protein 1 (AE-binding protein 1) (Aortic carboxypeptidase-like protein)	AEBP1 ACLP	AEBP1
15.6268	17.1153	15.475	17.1581	16.5476	17.1455	sp	+	154	1661	15.8831	17.1396	-1.2565	Q9H4G4	GAPR1_HUMAN	Golgi-associated plant pathogenesis-related protein 1 (GAPR-1) (Golgi-associated PR-1 protein) (Glioma pathogenesis-related protein 2) (GliPR 2)	GLIPR2 C9orf19 GAPR1	GLIPR2
17.4668	18.8153	17.5446	18.7493	17.6595	18.8133	tr	+	165	2073	17.5569	18.7926	-1.2357	E9PNQ8	E9PNQ8_HUMAN	Thy-1 membrane glycoprotein (Fragment)	THY1	THY1
13.0989	14.3068	14.0548	14.6085	12.5864	14.5197	tr	+	370	1315	13.2467	14.4783	-1.23165	A0A087WT44	A0A087WT44_HUMAN	Heme oxygenase 2	HMOX2	HMOX2
16.9613	18.3794	17.2829	18.3554	17.2789	18.3255	tr	+	1410	176	17.1744	18.3534	-1.17907	A0A0A0MRV0	A0A0A0MRV0_HUMAN	Ribosome-binding protein 1 (180 kDa ribosome receptor homolog) (RRp) (ES/130-related protein) (Ribosome receptor protein)	RRBP1 KIAA1398	RRBP1
13.0903	13.4236	12.0039	13.48	11.7118	13.4276	sp	+	360	2089	12.2687	13.4437	-1.17507	Q96QE5	TEFM_HUMAN	Transcription elongation factor, mitochondrial	TEFM C17orf42	TEFM
20.9203	22.1001	20.9278	22.066	20.9052	22.0623	sp	+	466	72	20.9178	22.0761	-1.15834	P08670	VIME_HUMAN	Vimentin	VIM	VIM
16.4971	17.6895	16.3797	17.6048	16.5099	17.5438	sp	+	439	1186	16.4622	17.6127	-1.15047	P04181	OAT_HUMAN	Ornithine aminotransferase, mitochondrial (EC 2.6.1.13) (Ornithine delta-aminotransferase) (Ornithine--oxo-acid aminotransferase) [Cleaved into: Ornithine aminotransferase, hepatic form;Ornithine aminotransferase, renal form]	OAT	OAT
17.9794	18.9832	17.7556	18.9675	17.7125	18.9285	sp	+	577	111	17.8158	18.9597	-1.14389	P26038	MOES_HUMAN	Moesin (Membrane-organizing extension spike protein)	MSN	MSN
12.5836	13.4488	13.1138	13.579	12.3557	14.453	tr	+	145	2664	12.6844	13.8269	-1.14254	B7ZBQ3	B7ZBQ3_HUMAN	Mediator of RNA polymerase II transcription subunit 20 (Mediator complex subunit 20)	MED20	MED20
12.8994	13.894	12.934	13.9324	12.4871	13.8762	sp	+	138	2163	12.7735	13.9009	-1.12738	Q96C01	F136A_HUMAN	Protein FAM136A	FAM136A	FAM136A
15.6054	16.5608	15.5863	16.8054	15.4344	16.5948	tr	+	238	1579	15.542	16.6537	-1.11162	B7Z6Z4	B7Z6Z4_HUMAN	Myosin light polypeptide 6 (cDNA FLJ56329, highly similar to Myosin light polypeptide 6)	MYL6	MYL6
16.9707	17.9708	16.8342	17.7585	16.5889	17.9713	sp	+	1960	67	16.7979	17.9002	-1.10227	P35579	MYH9_HUMAN	Myosin-9 (Cellular myosin heavy chain, type A) (Myosin heavy chain 9) (Myosin heavy chain, non-muscle IIa) (Non-muscle myosin heavy chain A) (NMMHC-A) (Non-muscle myosin heavy chain IIa) (NMMHC II-a) (NMMHC-IIA)	MYH9	MYH9
14.1815	15.0051	13.5462	15.2114	14.4404	15.2334	sp	+	494	1829	14.056	15.15	-1.09393	O60701	UGDH_HUMAN	UDP-glucose 6-dehydrogenase (UDP-Glc dehydrogenase) (UDP-GlcDH) (UDPGDH) (EC 1.1.1.22)	UGDH	UGDH
18.3172	19.4657	18.3656	19.427	18.3646	19.4199	tr	+	182	1700	18.3491	19.4375	-1.0884	A8KAH6	A8KAH6_HUMAN	Heat shock 27kDa protein 2, isoform CRA_a (Heat-shock protein beta-2) (Protein HSPB2-C11orf52) (cDNA FLJ77220, highly similar to Homo sapiens heat shock 27kDa protein 2 (HSPB2), mRNA)	HSPB2-C11orf52 HSPB2 hCG_39461	HSPB2-C11orf52
15.6604	15.8776	14.766	16.6095	14.8569	16.0424	tr	+	1153	1209	15.0944	16.1765	-1.08205	C9JVC9	C9JVC9_HUMAN	Voltage-dependent calcium channel subunit alpha-2/delta-2	CACNA2D2	CACNA2D2
15.8827	16.8236	15.8311	16.8759	15.593	16.8488	tr	+	1026	834	15.7689	16.8495	-1.08053	A0A087X0S5	A0A087X0S5_HUMAN	Collagen alpha-1(VI) chain	COL6A1	COL6A1
16.9665	17.2816	15.8317	17.2667	15.9165	17.4047	sp	+	351	1778	16.2382	17.3177	-1.07945	Q8NE86	MCU_HUMAN	Calcium uniporter protein, mitochondrial (HsMCU) (Coiled-coil domain-containing protein 109A)	MCU C10orf42 CCDC109A	MCU
14.2184	15.0779	14.3756	15.2906	13.6806	15.1219	sp	+	133	2466	14.0915	15.1634	-1.07191	Q01628	IFM3_HUMAN	Interferon-induced transmembrane protein 3 (Dispanin subfamily A member 2b) (DSPA2b) (Interferon-inducible protein 1-8U)	IFITM3	IFITM3
15.2349	16.3663	15.2412	16.2682	15.4012	16.3983	sp	+	261	1341	15.2925	16.3443	-1.0518	Q14847	LASP1_HUMAN	LIM and SH3 domain protein 1 (LASP-1) (Metastatic lymph node gene 50 protein) (MLN 50)	LASP1 MLN50	LASP1
15.5152	16.1929	14.9402	16.3143	15.0574	16.1108	sp	+	929	732	15.1709	16.206	-1.03512	Q8N3V7	SYNPO_HUMAN	Synaptopodin	SYNPO KIAA1029	SYNPO
14.8375	15.7023	14.7291	15.5266	14.0722	15.4977	tr	+	791	1421	14.5463	15.5755	-1.02926	G0XQ39	G0XQ39_HUMAN	STIM1L (Stromal interaction molecule 1)	STIM1	STIM1
14.1503	14.831	14.2447	15.2669	14.1362	15.5158	sp	+	175	2699	14.1771	15.2046	-1.02752	P62330	ARF6_HUMAN	ADP-ribosylation factor 6	ARF6	ARF6
14.9619	16.0236	14.9949	16.4588	15.4424	15.9989	cont	+	NaN	2599	15.1331	16.1605	-1.02741	47	sp
17.0726	17.9313	16.8775	17.9367	16.825	17.9875	sp	+	582	1049	16.925	17.9519	-1.02682	Q96AY3	FKB10_HUMAN	Peptidyl-prolyl cis-trans isomerase FKBP10 (PPIase FKBP10) (EC 5.2.1.8) (65 kDa FK506-binding protein) (65 kDa FKBP) (FKBP-65) (FK506-binding protein 10) (FKBP-10) (Immunophilin FKBP65) (Rotamase)	FKBP10 FKBP65 PSEC0056	FKBP10
14.4308	15.958	14.8731	15.8198	15.1109	15.7082	sp	+	201	2007	14.8049	15.8287	-1.02374	Q15363	TMED2_HUMAN	Transmembrane emp24 domain-containing protein 2 (Membrane protein p24A) (p24) (p24 family protein beta-1) (p24beta1)	TMED2 RNP24	TMED2
12.3745	13.432	12.4151	13.4733	12.3069	13.233	sp	+	785	2124	12.3655	13.3794	-1.01398	Q16666	IF16_HUMAN	Gamma-interferon-inducible protein 16 (Ifi-16) (Interferon-inducible myeloid differentiation transcriptional activator)	IFI16 IFNGIP1	IFI16
16.5246	17.5142	16.5265	17.491	16.4321	17.4842	sp	+	115	1851	16.4944	17.4965	-1.00205	P14174	MIF_HUMAN	Macrophage migration inhibitory factor (MIF) (EC 5.3.2.1) (Glycosylation-inhibiting factor) (GIF) (L-dopachrome isomerase) (L-dopachrome tautomerase) (EC 5.3.3.12) (Phenylpyruvate tautomerase)	MIF GLIF MMIF	MIF
16.7549	17.6001	16.6304	17.8682	17.1453	17.9884	sp	+	2061	183	16.8435	17.8189	-0.97537	Q9NZM1	MYOF_HUMAN	Myoferlin (Fer-1-like protein 3)	MYOF FER1L3 KIAA1207	MYOF
14.6076	15.3607	14.4417	15.4802	14.3713	15.4135	tr	+	523	1769	14.4735	15.4181	-0.944566	F5H6I7	F5H6I7_HUMAN	Atlastin-3	ATL3	ATL3
15.5922	16.4739	15.5684	16.6042	15.7141	16.5723	sp	+	150	2253	15.6249	16.5502	-0.925256	Q12988	HSPB3_HUMAN	Heat shock protein beta-3 (HspB3) (Heat shock 17 kDa protein) (HSP 17) (Protein 3)	HSPB3 HSP27 HSPL27	HSPB3
16.4914	17.467	16.3531	17.3655	16.4413	17.2097	sp	+	736	915	16.4286	17.3474	-0.918802	Q32P28	P3H1_HUMAN	Prolyl 3-hydroxylase 1 (EC 1.14.11.7) (Growth suppressor 1) (Leucine- and proline-enriched proteoglycan 1) (Leprecan-1)	P3H1 GROS1 LEPRE1 PSEC0109	P3H1
17.8341	18.6397	17.6863	18.6369	17.6743	18.6655	sp	+	331	869	17.7315	18.6474	-0.915865	Q15293	RCN1_HUMAN	Reticulocalbin-1	RCN1 RCN	RCN1
21.4848	22.4158	21.501	22.4003	21.5133	22.43	sp	+	418	222	21.4997	22.4154	-0.915688	P50454	SERPH_HUMAN	Serpin H1 (47 kDa heat shock protein) (Arsenic-transactivated protein 3) (AsTP3) (Cell proliferation-inducing gene 14 protein) (Collagen-binding protein) (Colligin) (Rheumatoid arthritis-related antigen RA-A47)	SERPINH1 CBP1 CBP2 HSP47 SERPINH2 PIG14	SERPINH1
16.533	17.6836	16.5064	17.1859	16.6817	17.5962	sp	+	471	975	16.5737	17.4886	-0.914869	P23381	SYWC_HUMAN	Tryptophan--tRNA ligase, cytoplasmic (EC 6.1.1.2) (Interferon-induced protein 53) (IFP53) (Tryptophanyl-tRNA synthetase) (TrpRS) (hWRS) [Cleaved into: T1-TrpRS;T2-TrpRS]	WARS IFI53 WRS	WARS
18.3351	18.8239	17.7523	18.829	17.6123	18.7458	sp	+	329	806	17.8999	18.7996	-0.899662	Q08257	QOR_HUMAN	Quinone oxidoreductase (EC 1.6.5.5) (NADPH:quinone reductase) (Zeta-crystallin)	CRYZ	CRYZ
11.9067	13.2355	12.4822	13.4081	12.5747	12.9844	tr	+	294	2535	12.3212	13.2093	-0.888122	H7C5E2	H7C5E2_HUMAN	B-cell receptor-associated protein 29 (Fragment)	BCAP29	BCAP29
16.8795	17.7081	17.2468	17.9	16.6443	17.7823	sp	+	475	2011	16.9235	17.7968	-0.873257	Q9UBM7	DHCR7_HUMAN	7-dehydrocholesterol reductase (7-DHC reductase) (EC 1.3.1.21) (Delta7-sterol reductase) (Sterol Delta(7)-reductase) (Sterol reductase SR-2)	DHCR7 D7SR	DHCR7
19.7302	20.6118	19.6697	20.3247	19.622	20.697	sp	+	216	755	19.674	20.5445	-0.870506	P23284	PPIB_HUMAN	Peptidyl-prolyl cis-trans isomerase B (PPIase B) (EC 5.2.1.8) (CYP-S1) (Cyclophilin B) (Rotamase B) (S-cyclophilin) (SCYLP)	PPIB CYPB	PPIB
16.6041	17.3668	16.8244	17.5389	16.4685	17.5558	sp	+	2468	82	16.6323	17.4872	-0.854895	P46821	MAP1B_HUMAN	Microtubule-associated protein 1B (MAP-1B) [Cleaved into: MAP1B heavy chain;MAP1 light chain LC1]	MAP1B	MAP1B
16.4259	17.4156	16.5267	17.3392	16.6569	17.41	sp	+	570	1286	16.5365	17.3882	-0.851767	O95302	FKBP9_HUMAN	Peptidyl-prolyl cis-trans isomerase FKBP9 (PPIase FKBP9) (EC 5.2.1.8) (63 kDa FK506-binding protein) (63 kDa FKBP) (FKBP-63) (FK506-binding protein 9) (FKBP-9) (Rotamase)	FKBP9 FKBP60 FKBP63	FKBP9
15.0941	15.9943	15.1659	15.8331	15.1618	16.0308	sp	+	1948	2312	15.1406	15.9527	-0.812129	Q13332	PTPRS_HUMAN	Receptor-type tyrosine-protein phosphatase S (R-PTP-S) (EC 3.1.3.48) (Receptor-type tyrosine-protein phosphatase sigma) (R-PTP-sigma)	PTPRS	PTPRS
14.9478	15.488	14.6715	15.7258	14.7265	15.5471	sp	+	329	2027	14.7819	15.587	-0.805049	Q15417	CNN3_HUMAN	Calponin-3 (Calponin, acidic isoform)	CNN3	CNN3
17.0672	17.8756	17.1226	17.8523	17.2383	18.0437	tr	+	677	470	17.1427	17.9239	-0.781178	A0A1C7CYX9	A0A1C7CYX9_HUMAN	Dihydropyrimidinase-related protein 2	DPYSL2	DPYSL2
13.4882	14.2492	13.2508	14.0232	13.2737	14.0622	tr	+	466	2042	13.3376	14.1115	-0.773994	A2AB90	A2AB90_HUMAN	Tapasin	TAPBP	TAPBP
13.6785	14.5157	13.7627	14.5684	13.614	14.284	tr	+	88	2656	13.6851	14.456	-0.770967	Q5T123	Q5T123_HUMAN	SH3 domain-binding glutamic acid-rich-like protein 3	SH3BGRL3	SH3BGRL3
16.2425	16.9119	16.3079	17.0131	16.0518	16.9787	sp	+	623	1027	16.2007	16.9679	-0.767204	P29401	TKT_HUMAN	Transketolase (TK) (EC 2.2.1.1)	TKT	TKT
14.4631	15.3028	14.3708	15.2836	15.0557	15.5745	sp	+	325	1433	14.6299	15.3869	-0.757071	P35914	HMGCL_HUMAN	Hydroxymethylglutaryl-CoA lyase, mitochondrial (HL) (HMG-CoA lyase) (EC 4.1.3.4) (3-hydroxy-3-methylglutarate-CoA lyase)	HMGCL	HMGCL
13.7636	14.3529	14.0546	14.9842	13.7431	14.4574	sp	+	423	855	13.8538	14.5982	-0.744434	P50440	GATM_HUMAN	Glycine amidinotransferase, mitochondrial (EC 2.1.4.1) (L-arginine:glycine amidinotransferase) (Transamidinase)	GATM AGAT	GATM
14.3047	14.8347	14.0587	15.1518	14.2746	14.8797	tr	+	1228	2315	14.2127	14.9554	-0.742774	H9KV28	H9KV28_HUMAN	Protein diaphanous homolog 1	DIAPH1	DIAPH1
16.4478	17.2393	16.4805	17.2565	16.5292	17.188	sp	+	178	2305	16.4858	17.2279	-0.742128	O60831	PRAF2_HUMAN	PRA1 family protein 2	PRAF2 JM4	PRAF2
14.4456	15.024	14.0277	15.2147	14.2172	14.658	sp	+	1106	1997	14.2302	14.9656	-0.735403	P09619	PGFRB_HUMAN	Platelet-derived growth factor receptor beta (PDGF-R-beta) (PDGFR-beta) (EC 2.7.10.1) (Beta platelet-derived growth factor receptor) (Beta-type platelet-derived growth factor receptor) (CD140 antigen-like family member B) (Platelet-derived growth factor receptor 1) (PDGFR-1) (CD antigen CD140b)	PDGFRB PDGFR PDGFR1	PDGFRB
16.4452	16.7758	15.7656	16.7709	15.8796	16.7344	sp	+	2511	116	16.0301	16.7604	-0.730249	P49327	FAS_HUMAN	Fatty acid synthase (EC 2.3.1.85) [Includes: [Acyl-carrier-protein] S-acetyltransferase (EC 2.3.1.38);[Acyl-carrier-protein] S-malonyltransferase (EC 2.3.1.39);3-oxoacyl-[acyl-carrier-protein] synthase (EC 2.3.1.41);3-oxoacyl-[acyl-carrier-protein] reductase (EC 1.1.1.100);3-hydroxyacyl-[acyl-carrier-protein] dehydratase (EC 4.2.1.59);Enoyl-[acyl-carrier-protein] reductase (EC 1.3.1.39);Oleoyl-[a…	FASN FAS	FASN
14.0051	14.4407	13.874	14.6843	13.804	14.7405	tr	+	290	1872	13.8944	14.6219	-0.727472	F8VZA2	F8VZA2_HUMAN	LETM1 domain-containing protein 1 (Fragment)	LETMD1	LETMD1
16.2005	16.8182	16.0388	16.8523	16.1621	16.8579	sp	+	362	1487	16.1338	16.8428	-0.708992	Q9P035	HACD3_HUMAN	Very-long-chain (3R)-3-hydroxyacyl-CoA dehydratase 3 (EC 4.2.1.134) (3-hydroxyacyl-CoA dehydratase 3) (HACD3) (Butyrate-induced protein 1) (B-ind1) (hB-ind1) (Protein-tyrosine phosphatase-like A domain-containing protein 1)	HACD3 BIND1 PTPLAD1	HACD3
17.4196	18.2644	17.6441	18.1703	17.5468	18.232	sp	+	2541	28	17.5368	18.2222	-0.685402	Q9Y490	TLN1_HUMAN	Talin-1	TLN1 KIAA1027 TLN	TLN1
14.7117	15.1948	14.656	15.2319	14.3633	15.3588	sp	+	1226	425	14.577	15.2618	-0.684821	P55265	DSRAD_HUMAN	Double-stranded RNA-specific adenosine deaminase (DRADA) (EC 3.5.4.37) (136 kDa double-stranded RNA-binding protein) (p136) (Interferon-inducible protein 4) (IFI-4) (K88DSRBP)	ADAR ADAR1 DSRAD G1P1 IFI4	ADAR
16.8844	17.6129	16.8887	17.6027	16.9176	17.501	sp	+	640	1437	16.8969	17.5722	-0.675268	Q16822	PCKGM_HUMAN	Phosphoenolpyruvate carboxykinase [GTP], mitochondrial (PEPCK-M) (EC 4.1.1.32)	PCK2 PEPCK2	PCK2
14.0889	14.5833	14.1757	14.8447	14.0974	14.9481	sp	+	1253	1513	14.1207	14.792	-0.671373	Q7L576	CYFP1_HUMAN	Cytoplasmic FMR1-interacting protein 1 (Specifically Rac1-associated protein 1) (Sra-1) (p140sra-1)	CYFIP1 KIAA0068	CYFIP1
13.8895	14.3819	13.7805	14.5496	13.7233	14.4733	tr	+	903	2410	13.7978	14.4683	-0.670497	H0Y9V7	H0Y9V7_HUMAN	Calcium-transporting ATPase type 2C member 1 (Fragment)	ATP2C1	ATP2C1
17.8545	18.326	17.6343	18.486	17.9428	18.6294	sp	+	603	1538	17.8105	18.4805	-0.669928	P03915	NU5M_HUMAN	NADH-ubiquinone oxidoreductase chain 5 (EC 7.1.1.2) (NADH dehydrogenase subunit 5)	MT-ND5 MTND5 NADH5 ND5	MT-ND5
18.6855	19.3874	18.6967	19.35	18.6782	19.3234	sp	+	298	2550	18.6868	19.3536	-0.666761	P12236	ADT3_HUMAN	ADP/ATP translocase 3 (ADP,ATP carrier protein 3) (ADP,ATP carrier protein, isoform T2) (ANT 2) (Adenine nucleotide translocator 3) (ANT 3) (Solute carrier family 25 member 6) [Cleaved into: ADP/ATP translocase 3, N-terminally processed]	SLC25A6 ANT3 CDABP0051	SLC25A6
17.5085	18.085	17.4154	18.1323	17.4736	18.1058	sp	+	2322	118	17.4658	18.1077	-0.641916	Q6UVK1	CSPG4_HUMAN	Chondroitin sulfate proteoglycan 4 (Chondroitin sulfate proteoglycan NG2) (Melanoma chondroitin sulfate proteoglycan) (Melanoma-associated chondroitin sulfate proteoglycan)	CSPG4 MCSP	CSPG4
14.7205	15.339	14.497	15.0766	14.5105	15.2305	sp	+	275	1680	14.576	15.2154	-0.639386	Q7Z7K6	CENPV_HUMAN	Centromere protein V (CENP-V) (Nuclear protein p30) (Proline-rich protein 6)	CENPV PRR6	CENPV
15.7516	16.222	15.2975	16.1622	15.6709	16.207	sp	+	669	1018	15.5734	16.197	-0.623685	O94925-3	GLSK_HUMAN	Glutaminase kidney isoform, mitochondrial (GLS) (EC 3.5.1.2) (K-glutaminase) (L-glutamine amidohydrolase) [Cleaved into: Glutaminase kidney isoform, mitochondrial 68 kDa chain;Glutaminase kidney isoform, mitochondrial 65 kDa chain]	GLS GLS1 KIAA0838	GLS
18.0016	18.6582	18.0192	18.613	18.0023	18.611	sp	+	362	2495	18.0077	18.6274	-0.619734	Q00325-2	MPCP_HUMAN	Phosphate carrier protein, mitochondrial (Phosphate transport protein) (PTP) (Solute carrier family 25 member 3)	SLC25A3 PHC OK/SW-cl.48	SLC25A3
14.7089	15.3091	14.5872	15.1343	14.652	15.3457	sp	+	944	2668	14.6494	15.2631	-0.613695	Q14697	GANAB_HUMAN	Neutral alpha-glucosidase AB (EC 3.2.1.207) (Alpha-glucosidase 2) (Glucosidase II subunit alpha)	GANAB G2AN KIAA0088	GANAB
14.7441	15.3256	14.6345	15.3287	14.6953	15.2394	sp	+	340	2216	14.6913	15.2979	-0.606606	Q9HAV0	GBB4_HUMAN	Guanine nucleotide-binding protein subunit beta-4 (Transducin beta chain 4)	GNB4	GNB4
14.6415	15.1204	14.5149	15.362	14.674	15.1642	sp	+	382	2434	14.6101	15.2155	-0.605431	Q9NXS2	QPCTL_HUMAN	Glutaminyl-peptide cyclotransferase-like protein (EC 2.3.2.5) (Golgi-resident glutaminyl-peptide cyclotransferase) (isoQC) (gQC)	QPCTL	QPCTL
16.9895	17.5841	17.0447	17.6124	17.053	17.7022	sp	+	639	1046	17.0291	17.6329	-0.603802	P35908	K22E_HUMAN	Keratin, type II cytoskeletal 2 epidermal (Cytokeratin-2e) (CK-2e) (Epithelial keratin-2e) (Keratin-2 epidermis) (Keratin-2e) (K2e) (Type-II keratin Kb2)	KRT2 KRT2A KRT2E	KRT2
18.6574	19.1916	18.4744	19.1217	18.4913	19.1087	tr	+	588	641	18.541	19.1407	-0.599674	A0A0U1RRM4	A0A0U1RRM4_HUMAN	Polypyrimidine tract-binding protein 1	PTBP1	PTBP1
14.3283	14.9499	14.53	15.0672	14.4836	15.0939	sp	+	223	1640	14.4473	15.037	-0.589685	P09936	UCHL1_HUMAN	Ubiquitin carboxyl-terminal hydrolase isozyme L1 (UCH-L1) (EC 3.4.19.12) (Neuron cytoplasmic protein 9.5) (PGP 9.5) (PGP9.5) (Ubiquitin thioesterase L1)	UCHL1	UCHL1
15.6165	16.27	15.5331	16.1074	15.5272	16.0617	sp	+	750	981	15.5589	16.1464	-0.587438	P42224	STAT1_HUMAN	Signal transducer and activator of transcription 1-alpha/beta (Transcription factor ISGF-3 components p91/p84)	STAT1	STAT1
16.7005	17.198	16.5852	16.9178	16.4494	17.3497	sp	+	334	850	16.5784	17.1551	-0.576773	Q9H2U2	IPYR2_HUMAN	Inorganic pyrophosphatase 2, mitochondrial (EC 3.6.1.1) (Pyrophosphatase SID6-306) (Pyrophosphate phospho-hydrolase 2) (PPase 2)	PPA2 HSPC124	PPA2
14.7075	15.1799	14.4247	15.0483	14.7148	15.3477	sp	+	184	2237	14.6156	15.192	-0.576339	P61224	RAP1B_HUMAN	Ras-related protein Rap-1b (GTP-binding protein smg p21B)	RAP1B OK/SW-cl.11	RAP1B
17.9771	18.2497	17.8893	18.4766	17.5862	18.4237	sp	+	622	534	17.8175	18.3834	-0.565832	Q8NBJ5	GT251_HUMAN	Procollagen galactosyltransferase 1 (EC 2.4.1.50) (Collagen beta(1-O)galactosyltransferase 1) (ColGalT 1) (Glycosyltransferase 25 family member 1) (Hydroxylysine galactosyltransferase 1)	COLGALT1 GLT25D1 PSEC0241	COLGALT1
20.9258	21.4734	20.9326	21.546	20.9436	21.4592	sp	+	196	2456	20.934	21.4929	-0.558895	Q9NVS2	RT18A_HUMAN	39S ribosomal protein S18a, mitochondrial (MRP-S18-a) (Mrps18a) (S18mt-a) (39S ribosomal protein S18-3, mitochondrial) (MRP-S18-3) (Mitochondrial large ribosomal subunit protein bS18a) (Mitochondrial large ribosomal subunit protein mL66)	MRPS18A	MRPS18A
14.6974	15.1603	14.6549	15.1439	14.409	15.1234	sp	+	341	2598	14.5871	15.1425	-0.555421	Q8IZV5	RDH10_HUMAN	Retinol dehydrogenase 10 (EC 1.1.1.300) (Short chain dehydrogenase/reductase family 16C member 4)	RDH10 SDR16C4 UNQ9375/PRO34191	RDH10
14.6161	15.3599	14.6738	15.3115	14.7322	14.989	sp	+	795	452	14.674	15.2202	-0.546134	Q9UQ90	SPG7_HUMAN	Paraplegin (EC 3.4.24.-) (Cell matrix adhesion regulator) (Spastic paraplegia 7 protein)	SPG7 CAR CMAR PGN	SPG7
18.1942	18.8115	18.3373	18.8898	18.3098	18.7764	sp	+	615	434	18.2804	18.8259	-0.545479	Q96CM8-2	ACSF2_HUMAN	Medium-chain acyl-CoA ligase ACSF2, mitochondrial (EC 6.2.1.2)	ACSF2 UNQ493/PRO1009	ACSF2
17.2609	17.6369	17.3078	17.8982	17.2455	17.8932	sp	+	306	1154	17.2714	17.8094	-0.538027	Q9NUJ1	ABHDA_HUMAN	Mycophenolic acid acyl-glucuronide esterase, mitochondrial (EC 3.1.1.93) (Alpha/beta hydrolase domain-containing protein 10) (Abhydrolase domain-containing protein 10)	ABHD10	ABHD10
18.5439	19.1653	18.6567	19.0657	18.5998	19.1834	sp	+	432	774	18.6001	19.1381	-0.538023	Q8NBS9	TXND5_HUMAN	Thioredoxin domain-containing protein 5 (Endoplasmic reticulum resident protein 46) (ER protein 46) (ERp46) (Thioredoxin-like protein p46)	TXNDC5 TLP46 UNQ364/PRO700	TXNDC5
14.8862	15.4374	14.962	15.4823	14.9912	15.5319	sp	+	469	1304	14.9465	15.4839	-0.537391	Q53EL6	PDCD4_HUMAN	Programmed cell death protein 4 (Neoplastic transformation inhibitor protein) (Nuclear antigen H731-like) (Protein 197/15a)	PDCD4 H731	PDCD4
18.5792	18.9777	18.3968	19.0118	18.44	18.9862	sp	+	285	1576	18.472	18.9919	-0.519936	P06753-2	TPM3_HUMAN	Tropomyosin alpha-3 chain (Gamma-tropomyosin) (Tropomyosin-3) (Tropomyosin-5) (hTM5)	TPM3	TPM3
17.8118	18.3506	17.9811	18.5164	17.9445	18.4042	sp	+	175	1811	17.9125	18.4237	-0.511276	O43181	NDUS4_HUMAN	NADH dehydrogenase [ubiquinone] iron-sulfur protein 4, mitochondrial (Complex I-18 kDa) (CI-18 kDa) (Complex I-AQDQ) (CI-AQDQ) (NADH-ubiquinone oxidoreductase 18 kDa subunit)	NDUFS4	NDUFS4
16.5877	17.1973	16.6918	17.207	16.6513	17.0548	sp	+	1192	2672	16.6436	17.153	-0.509443	Q9NQC3-2	RTN4_HUMAN	Reticulon-4 (Foocen) (Neurite outgrowth inhibitor) (Nogo protein) (Neuroendocrine-specific protein) (NSP) (Neuroendocrine-specific protein C homolog) (RTN-x) (Reticulon-5)	RTN4 KIAA0886 NOGO My043 SP1507	RTN4
20.0908	20.6131	20.0768	20.6207	20.1092	20.5471	sp	+	602	135	20.0923	20.5936	-0.501354	Q07065	CKAP4_HUMAN	Cytoskeleton-associated protein 4 (63-kDa cytoskeleton-linking membrane protein) (Climp-63) (p63)	CKAP4	CKAP4
16.8346	17.2331	16.5567	17.2004	16.7973	17.2453	sp	+	415	1072	16.7295	17.2263	-0.496773	Q9UKU7	ACAD8_HUMAN	Isobutyryl-CoA dehydrogenase, mitochondrial (IBDH) (EC 1.3.8.-) (Activator-recruited cofactor 42 kDa component) (ARC42) (Acyl-CoA dehydrogenase family member 8) (ACAD-8)	ACAD8 ARC42 IBD	ACAD8
15.7651	16.3721	15.8657	16.2219	15.6239	16.1491	sp	+	649	1171	15.7516	16.2477	-0.496107	Q16643-3	DREB_HUMAN	Drebrin (Developmentally-regulated brain protein)	DBN1 D0S117E	DBN1
17.6603	18.2296	17.7796	18.2042	17.7665	18.2557	sp	+	517	746	17.7355	18.2298	-0.494324	P30837	AL1B1_HUMAN	Aldehyde dehydrogenase X, mitochondrial (EC 1.2.1.3) (Aldehyde dehydrogenase 5) (Aldehyde dehydrogenase family 1 member B1)	ALDH1B1 ALDH5 ALDHX	ALDH1B1
17.9989	18.4306	17.9669	18.3444	17.7429	18.4027	tr	+	482	1232	17.9029	18.3926	-0.489662	B4DR61	B4DR61_HUMAN	Protein transport protein Sec61 subunit alpha isoform 1 (cDNA FLJ59739, highly similar to Protein transport protein Sec61 subunit alpha isoform 1)	SEC61A1	SEC61A1
15.5799	16.0616	15.6073	15.9751	15.4176	16.0317	sp	+	277	2037	15.5349	16.0228	-0.487869	Q16740	CLPP_HUMAN	ATP-dependent Clp protease proteolytic subunit, mitochondrial (EC 3.4.21.92) (Endopeptidase Clp)	CLPP	CLPP
15.3021	15.803	15.3231	15.8907	15.3639	15.7551	sp	+	889	1468	15.3297	15.8163	-0.486572	Q9BZF1	OSBL8_HUMAN	Oxysterol-binding protein-related protein 8 (ORP-8) (OSBP-related protein 8)	OSBPL8 KIAA1451 ORP8 OSBP10	OSBPL8
17.3884	17.8078	17.3588	17.8105	17.2632	17.8457	sp	+	1013	372	17.3368	17.8213	-0.484512	P13637	AT1A3_HUMAN	Sodium/potassium-transporting ATPase subunit alpha-3 (Na(+)/K(+) ATPase alpha-3 subunit) (EC 7.2.2.13) (Na(+)/K(+) ATPase alpha(III) subunit) (Sodium pump subunit alpha-3)	ATP1A3	ATP1A3
17.2234	17.7443	17.2366	17.6646	17.2235	17.7213	sp	+	459	2071	17.2278	17.7101	-0.48225	P03905	NU4M_HUMAN	NADH-ubiquinone oxidoreductase chain 4 (EC 7.1.1.2) (NADH dehydrogenase subunit 4)	MT-ND4 MTND4 NADH4 ND4	MT-ND4
15.5054	15.8105	15.395	15.749	15.2677	16.0131	sp	+	380	2569	15.3893	15.8575	-0.468195	P00156	CYB_HUMAN	Cytochrome b (Complex III subunit 3) (Complex III subunit III) (Cytochrome b-c1 complex subunit 3) (Ubiquinol-cytochrome-c reductase complex cytochrome b subunit)	MT-CYB COB CYTB MTCYB	MT-CYB
15.6475	16.08	15.7433	16.23	15.6858	16.1705	sp	+	126	2268	15.6922	16.1602	-0.467967	P62318	SMD3_HUMAN	Small nuclear ribonucleoprotein Sm D3 (Sm-D3) (snRNP core protein D3)	SNRPD3	SNRPD3
20.06	20.483	20.0263	20.4921	19.9584	20.4679	sp	+	470	221	20.0149	20.481	-0.466064	P17661	DESM_HUMAN	Desmin	DES	DES
16.3374	16.8416	16.3072	16.8209	16.5086	16.8657	sp	+	95	2153	16.3844	16.8427	-0.458319	Q9Y5L4	TIM13_HUMAN	Mitochondrial import inner membrane translocase subunit Tim13	TIMM13 TIM13B TIMM13A TIMM13B	TIMM13
17.6071	18.0801	17.5968	18.0641	17.6009	18.032	sp	+	537	608	17.6016	18.0588	-0.45715	O75131	CPNE3_HUMAN	Copine-3 (Copine III)	CPNE3 CPN3 KIAA0636	CPNE3
16.8602	17.3322	16.8199	17.2204	16.7697	17.2439	sp	+	494	1805	16.8166	17.2655	-0.448896	Q8NBM8	PCYXL_HUMAN	Prenylcysteine oxidase-like (EC 1.8.3.-)	PCYOX1L PSEC0105	PCYOX1L
17.0263	17.3865	16.8741	17.3842	16.9344	17.4041	sp	+	386	861	16.9449	17.3916	-0.446659	Q6NVY1	HIBCH_HUMAN	3-hydroxyisobutyryl-CoA hydrolase, mitochondrial (EC 3.1.2.4) (3-hydroxyisobutyryl-coenzyme A hydrolase) (HIB-CoA hydrolase) (HIBYL-CoA-H)	HIBCH	HIBCH
16.0047	16.6236	16.0869	16.4478	16.0982	16.4559	sp	+	212	2295	16.0633	16.5091	-0.445787	P24390	ERD21_HUMAN	ER lumen protein-retaining receptor 1 (KDEL endoplasmic reticulum protein retention receptor 1) (KDEL receptor 1) (Putative MAPK-activating protein PM23)	KDELR1 ERD2.1	KDELR1
19.7156	20.2299	19.6786	20.0615	19.6869	20.0952	sp	+	214	1079	19.6937	20.1288	-0.435154	P30044	PRDX5_HUMAN	Peroxiredoxin-5, mitochondrial (EC 1.11.1.15) (Alu corepressor 1) (Antioxidant enzyme B166) (AOEB166) (Liver tissue 2D-page spot 71B) (PLP) (Peroxiredoxin V) (Prx-V) (Peroxisomal antioxidant enzyme) (TPx type VI) (Thioredoxin peroxidase PMP20)	PRDX5 ACR1 SBBI10	PRDX5
17.3768	18.001	17.6107	17.8626	17.4845	17.9071	sp	+	106	1523	17.4907	17.9236	-0.432901	O43920	NDUS5_HUMAN	NADH dehydrogenase [ubiquinone] iron-sulfur protein 5 (Complex I-15 kDa) (CI-15 kDa) (NADH-ubiquinone oxidoreductase 15 kDa subunit)	NDUFS5	NDUFS5
17.5701	17.9118	17.3978	17.9564	17.542	17.931	tr	+	3924	123	17.5033	17.9331	-0.429785	I6L894	I6L894_HUMAN	Ankyrin-2	ANK2	ANK2
18.0982	18.6031	18.0795	18.4976	18.2107	18.5751	sp	+	1104	226	18.1294	18.5586	-0.429144	Q9BSJ8	ESYT1_HUMAN	Extended synaptotagmin-1 (E-Syt1) (Membrane-bound C2 domain-containing protein)	ESYT1 FAM62A KIAA0747 MBC2	ESYT1
15.5477	16.0803	15.6872	16.1563	15.7947	16.0729	sp	+	251	1489	15.6765	16.1032	-0.426641	Q9BSH5	HDHD3_HUMAN	Haloacid dehalogenase-like hydrolase domain-containing protein 3	HDHD3 C9orf158	HDHD3
18.9744	19.4502	19.0582	19.4342	19.0272	19.4465	sp	+	381	694	19.0199	19.4437	-0.423717	P12277	KCRB_HUMAN	Creatine kinase B-type (EC 2.7.3.2) (Brain creatine kinase) (B-CK) (Creatine kinase B chain) (Creatine phosphokinase B-type) (CPK-B)	CKB CKBB	CKB
15.5766	15.9404	15.5451	15.8185	15.3553	15.9881	sp	+	113	1253	15.4923	15.9157	-0.423327	O95182	NDUA7_HUMAN	NADH dehydrogenase [ubiquinone] 1 alpha subcomplex subunit 7 (Complex I-B14.5a) (CI-B14.5a) (NADH-ubiquinone oxidoreductase subunit B14.5a)	NDUFA7	NDUFA7
17.7345	18.1409	17.683	18.1114	17.7156	18.1493	sp	+	463	1899	17.711	18.1338	-0.422825	P53634	CATC_HUMAN	Dipeptidyl peptidase 1 (EC 3.4.14.1) (Cathepsin C) (Cathepsin J) (Dipeptidyl peptidase I) (DPP-I) (DPPI) (Dipeptidyl transferase) [Cleaved into: Dipeptidyl peptidase 1 exclusion domain chain (Dipeptidyl peptidase I exclusion domain chain);Dipeptidyl peptidase 1 heavy chain (Dipeptidyl peptidase I heavy chain);Dipeptidyl peptidase 1 light chain (Dipeptidyl peptidase I light chain)]	CTSC CPPI	CTSC
17.7969	18.2401	17.934	18.3003	17.7894	18.2457	sp	+	325	1628	17.8401	18.262	-0.421913	Q9BQ69	MACD1_HUMAN	ADP-ribose glycohydrolase MACROD1 (MACRO domain-containing protein 1) (O-acetyl-ADP-ribose deacetylase MACROD1) (EC 3.5.1.-) (Protein LRP16) ([Protein ADP-ribosylaspartate] hydrolase MACROD1) (EC 3.2.2.-) ([Protein ADP-ribosylglutamate] hydrolase MACROD1) (EC 3.2.2.-)	MACROD1 LRP16	MACROD1
14.8065	15.2373	14.7608	15.1824	14.8235	15.2366	sp	+	193	977	14.7969	15.2188	-0.421842	P61586	RHOA_HUMAN	Transforming protein RhoA (EC 3.6.5.2) (Rho cDNA clone 12) (h12)	RHOA ARH12 ARHA RHO12	RHOA
15.9242	16.4795	16.0534	16.4005	16.1133	16.4699	tr	+	298	2190	16.0303	16.45	-0.419682	C9IZQ1	C9IZQ1_HUMAN	Translocon-associated protein subunit alpha	SSR1	SSR1
17.5968	18.1378	17.7392	18.0629	17.7733	18.1672	sp	+	700	790	17.7031	18.1227	-0.419518	P17655	CAN2_HUMAN	Calpain-2 catalytic subunit (EC 3.4.22.53) (Calcium-activated neutral proteinase 2) (CANP 2) (Calpain M-type) (Calpain large polypeptide L2) (Calpain-2 large subunit) (Millimolar-calpain) (M-calpain)	CAPN2 CANPL2	CAPN2
14.4017	14.7951	14.4917	14.8671	14.5228	15.01	tr	+	479	1988	14.4721	14.8907	-0.41865	E7EVQ6	E7EVQ6_HUMAN	Squalene monooxygenase	SQLE	SQLE
17.7161	18.1911	17.772	18.1188	17.7132	18.1444	sp	+	500	917	17.7338	18.1514	-0.417635	Q16647	PTGIS_HUMAN	Prostacyclin synthase (EC 5.3.99.4) (Prostaglandin I2 synthase)	PTGIS CYP8 CYP8A1	PTGIS
17.2761	17.707	17.2236	17.617	17.228	17.6477	sp	+	124	1399	17.2426	17.6573	-0.414696	O75380	NDUS6_HUMAN	NADH dehydrogenase [ubiquinone] iron-sulfur protein 6, mitochondrial (Complex I-13kD-A) (CI-13kD-A) (NADH-ubiquinone oxidoreductase 13 kDa-A subunit)	NDUFS6	NDUFS6
14.0917	14.3105	13.8508	14.4793	13.9841	14.3695	sp	+	803	1723	13.9755	14.3864	-0.41089	Q14155-5	ARHG7_HUMAN	Rho guanine nucleotide exchange factor 7 (Beta-Pix) (COOL-1) (PAK-interacting exchange factor beta) (p85)	ARHGEF7 COOL1 KIAA0142 P85SPR PAK3BP PIXB Nbla10314	ARHGEF7
14.8787	15.352	15.051	15.472	15.0801	15.4167	sp	+	632	1812	15.0033	15.4136	-0.410282	Q7L311	ARMX2_HUMAN	Armadillo repeat-containing X-linked protein 2 (ARM protein lost in epithelial cancers on chromosome X 2) (Protein ALEX2)	ARMCX2 ALEX2 KIAA0512	ARMCX2
14.4873	14.9369	14.6	14.8425	14.3917	14.901	sp	+	479	1815	14.493	14.8935	-0.400453	Q9BTU6	P4K2A_HUMAN	Phosphatidylinositol 4-kinase type 2-alpha (EC 2.7.1.67) (Phosphatidylinositol 4-kinase type II-alpha)	PI4K2A	PI4K2A
18.6002	18.9514	18.5643	19.0049	18.617	19.0149	sp	+	222	922	18.5938	18.9904	-0.396566	P04179	SODM_HUMAN	Superoxide dismutase [Mn], mitochondrial (EC 1.15.1.1)	SOD2	SOD2
17.6851	18.1598	17.7704	18.124	17.7764	18.1279	tr	+	519	979	17.7439	18.1372	-0.393295	A0A1W2PRS1	A0A1W2PRS1_HUMAN	Lysosome membrane protein 2 (Fragment)	SCARB2	SCARB2
15.6965	16.0946	15.7074	16.0402	15.7141	16.1437	sp	+	421	1008	15.706	16.0928	-0.386852	Q9NVH6-8	TMLH_HUMAN	Trimethyllysine dioxygenase, mitochondrial (EC 1.14.11.8) (Epsilon-trimethyllysine 2-oxoglutarate dioxygenase) (Epsilon-trimethyllysine hydroxylase) (TML hydroxylase) (TML-alpha-ketoglutarate dioxygenase) (TML dioxygenase) (TMLD)	TMLHE TMLH	TMLHE
13.8725	14.1282	13.7725	14.1941	13.7661	14.245	tr	+	213	2621	13.8037	14.1891	-0.385378	Q6ZR64	Q6ZR64_HUMAN	HBV PreS1-transactivated protein 1 (Matrix-remodeling-associated protein 7) (cDNA FLJ46603 fis, clone THYMU3047513)	MXRA7	MXRA7
17.1409	17.5028	17.0571	17.5739	17.2142	17.4888	sp	+	519	1032	17.1374	17.5219	-0.384474	P28838	AMPL_HUMAN	Cytosol aminopeptidase (EC 3.4.11.1) (Leucine aminopeptidase 3) (LAP-3) (Leucyl aminopeptidase) (Peptidase S) (Proline aminopeptidase) (EC 3.4.11.5) (Prolyl aminopeptidase)	LAP3 LAPEP PEPS	LAP3
20.3406	20.7484	20.3592	20.7402	20.4163	20.7741	sp	+	710	255	20.372	20.7542	-0.382221	P19338	NUCL_HUMAN	Nucleolin (Protein C23)	NCL	NCL
18.8348	19.2199	18.8345	19.2518	18.8694	19.2054	sp	+	311	1214	18.8462	19.2257	-0.379488	P53007	TXTP_HUMAN	Tricarboxylate transport protein, mitochondrial (Citrate transport protein) (CTP) (Solute carrier family 25 member 1) (Tricarboxylate carrier protein)	SLC25A1 SLC20A3	SLC25A1
16.1711	16.4933	16.1296	16.5494	16.1299	16.5256	sp	+	209	1808	16.1436	16.5228	-0.379198	Q8TED1	GPX8_HUMAN	Probable glutathione peroxidase 8 (GPx-8) (GSHPx-8) (EC 1.11.1.9)	GPX8 UNQ847/PRO1785	GPX8
16.2508	16.6591	16.1914	16.5555	16.1163	16.4684	sp	+	477	1101	16.1861	16.561	-0.374886	Q96I59	SYNM_HUMAN	Probable asparagine--tRNA ligase, mitochondrial (EC 6.1.1.22) (Asparaginyl-tRNA synthetase) (AsnRS)	NARS2	NARS2
18.0078	18.364	18.0372	18.4153	18.042	18.4291	sp	+	219	1302	18.029	18.4028	-0.373802	P49755	TMEDA_HUMAN	Transmembrane emp24 domain-containing protein 10 (21 kDa transmembrane-trafficking protein) (S31III125) (S31I125) (Tmp-21-I) (Transmembrane protein Tmp21) (p23) (p24 family protein delta-1) (p24delta1) (p24delta)	TMED10 TMP21	TMED10
19.809	20.1735	19.8139	20.1854	19.8454	20.2156	sp	+	250	1506	19.8228	20.1915	-0.368773	P17931	LEG3_HUMAN	Galectin-3 (Gal-3) (35 kDa lectin) (Carbohydrate-binding protein 35) (CBP 35) (Galactose-specific lectin 3) (Galactoside-binding protein) (GALBP) (IgE-binding protein) (L-31) (Laminin-binding protein) (Lectin L-29) (Mac-2 antigen)	LGALS3 MAC2	LGALS3
18.2305	18.616	18.3596	18.705	18.2588	18.6288	sp	+	454	829	18.283	18.6499	-0.366938	P36551	HEM6_HUMAN	Oxygen-dependent coproporphyrinogen-III oxidase, mitochondrial (COX) (Coprogen oxidase) (Coproporphyrinogenase) (EC 1.3.3.3)	CPOX CPO CPX	CPOX
19.155	19.5534	19.141	19.5104	19.1464	19.4769	sp	+	1241	69	19.1475	19.5136	-0.366079	P23634-5	AT2B4_HUMAN	Plasma membrane calcium-transporting ATPase 4 (PMCA4) (EC 7.2.2.10) (Matrix-remodeling-associated protein 1) (Plasma membrane calcium ATPase isoform 4) (Plasma membrane calcium pump isoform 4)	ATP2B4 ATP2B2 MXRA1	ATP2B4
19.1251	19.5192	19.1917	19.5083	19.1264	19.5026	sp	+	477	377	19.1477	19.51	-0.36231	Q6NUK1	SCMC1_HUMAN	Calcium-binding mitochondrial carrier protein SCaMC-1 (Mitochondrial ATP-Mg/Pi carrier protein 1) (Mitochondrial Ca(2+)-dependent solute carrier protein 1) (Small calcium-binding mitochondrial carrier protein 1) (Solute carrier family 25 member 24)	SLC25A24 APC1 MCSC1 SCAMC1	SLC25A24
19.9389	20.3154	19.9785	20.3158	19.9482	20.3131	sp	+	483	178	19.9552	20.3148	-0.359549	P05787	K2C8_HUMAN	Keratin, type II cytoskeletal 8 (Cytokeratin-8) (CK-8) (Keratin-8) (K8) (Type-II keratin Kb8)	KRT8 CYK8	KRT8
21.153	21.5453	21.1652	21.5217	21.2156	21.5377	sp	+	505	119	21.1779	21.5349	-0.356991	P30101	PDIA3_HUMAN	Protein disulfide-isomerase A3 (EC 5.3.4.1) (58 kDa glucose-regulated protein) (58 kDa microsomal protein) (p58) (Disulfide isomerase ER-60) (Endoplasmic reticulum resident protein 57) (ER protein 57) (ERp57) (Endoplasmic reticulum resident protein 60) (ER protein 60) (ERp60)	PDIA3 ERP57 ERP60 GRP58	PDIA3
18.3713	18.7683	18.3591	18.7192	18.4308	18.7441	sp	+	195	705	18.3871	18.7439	-0.356762	O00264	PGRC1_HUMAN	Membrane-associated progesterone receptor component 1 (mPR) (Dap1) (IZA)	PGRMC1 HPR6.6 PGRMC	PGRMC1
19.8006	20.1319	19.8089	20.1319	19.7145	20.1245	sp	+	558	249	19.7746	20.1295	-0.354824	P00367	DHE3_HUMAN	Glutamate dehydrogenase 1, mitochondrial (GDH 1) (EC 1.4.1.3)	GLUD1 GLUD	GLUD1
14.5552	14.8415	14.5279	14.8008	14.4396	14.9418	tr	+	393	2553	14.5076	14.8613	-0.353756	B6VEX4	B6VEX4_HUMAN	Abl interactor 1 (Abl-interactor 1 variant 21)	ABI1	ABI1
17.3196	17.7392	17.3252	17.6044	17.2976	17.6587	sp	+	180	1955	17.3141	17.6674	-0.353308	P18085	ARF4_HUMAN	ADP-ribosylation factor 4	ARF4 ARF2	ARF4
20.21	20.5985	20.2484	20.5648	20.2434	20.5867	sp	+	504	294	20.234	20.5833	-0.349384	P34897	GLYM_HUMAN	Serine hydroxymethyltransferase, mitochondrial (SHMT) (EC 2.1.2.1) (Glycine hydroxymethyltransferase) (Serine methylase)	SHMT2	SHMT2
15.7717	16.1005	15.8116	16.0595	15.6797	16.1051	tr	+	180	1832	15.7543	16.0884	-0.334062	J3KQ48	J3KQ48_HUMAN	Peptidyl-tRNA hydrolase 2, mitochondrial	PTRH2	PTRH2
21.9263	22.2873	21.9556	22.2903	21.9781	22.2791	sp	+	917	64	21.9533	22.2856	-0.33223	P19367	HXK1_HUMAN	Hexokinase-1 (EC 2.7.1.1) (Brain form hexokinase) (Hexokinase type I) (HK I) (Hexokinase-A)	HK1	HK1
19.7399	20.0918	19.709	19.9894	19.7218	20.081	sp	+	226	2228	19.7236	20.0541	-0.330462	P00846	ATP6_HUMAN	ATP synthase subunit a (F-ATPase protein 6)	MT-ATP6 ATP6 ATPASE6 MTATP6	MT-ATP6
18.9998	19.3866	19.1238	19.4181	19.132	19.4364	sp	+	510	565	19.0852	19.4137	-0.328505	P49257	LMAN1_HUMAN	Protein ERGIC-53 (ER-Golgi intermediate compartment 53 kDa protein) (Gp58) (Intracellular mannose-specific lectin MR60) (Lectin mannose-binding 1)	LMAN1 ERGIC53 F5F8D	LMAN1
17.2275	17.5752	17.1878	17.5281	17.232	17.5214	sp	+	706	1221	17.2158	17.5416	-0.325796	Q8IWA5-2	CTL2_HUMAN	Choline transporter-like protein 2 (Solute carrier family 44 member 2)	SLC44A2 CTL2 PSEC0210	SLC44A2
22.7195	23.0613	22.7426	23.0454	22.721	23.0443	sp	+	573	45	22.7277	23.0503	-0.322626	P10809	CH60_HUMAN	60 kDa heat shock protein, mitochondrial (EC 5.6.1.7) (60 kDa chaperonin) (Chaperonin 60) (CPN60) (Heat shock protein 60) (HSP-60) (Hsp60) (HuCHA60) (Mitochondrial matrix protein P1) (P60 lymphocyte protein)	HSPD1 HSP60	HSPD1
18.6824	19.0293	18.7286	19.0169	18.7269	19.0539	sp	+	959	93	18.7126	19.0334	-0.320726	P36776	LONM_HUMAN	Lon protease homolog, mitochondrial (EC 3.4.21.53) (LONHs) (Lon protease-like protein) (LONP) (Mitochondrial ATP-dependent protease Lon) (Serine protease 15)	LONP1 PRSS15	LONP1
18.0925	18.4353	18.0762	18.3782	18.109	18.4137	sp	+	224	1898	18.0926	18.409	-0.316484	Q9Y3B3	TMED7_HUMAN	Transmembrane emp24 domain-containing protein 7 (p24 family protein gamma-3) (p24gamma3) (p27)	TMED7 CGI-109	TMED7
19.4335	19.7987	19.5068	19.7499	19.4467	19.7856	sp	+	1012	110	19.4623	19.7781	-0.315718	Q9NSE4	SYIM_HUMAN	Isoleucine--tRNA ligase, mitochondrial (EC 6.1.1.5) (Isoleucyl-tRNA synthetase) (IleRS)	IARS2	IARS2
18.4283	18.7019	18.3637	18.6807	18.4312	18.7572	sp	+	584	508	18.4077	18.7133	-0.305538	P23368	MAOM_HUMAN	NAD-dependent malic enzyme, mitochondrial (NAD-ME) (EC 1.1.1.38) (Malic enzyme 2)	ME2	ME2
18.9509	19.1989	18.912	19.2188	18.8556	19.2132	sp	+	361	785	18.9062	19.2103	-0.304144	Q15019-2	SEPT2_HUMAN	Septin-2 (Neural precursor cell expressed developmentally down-regulated protein 5) (NEDD-5)	SEPTIN2 DIFF6 KIAA0158 NEDD5 SEPT2	SEPTIN2
18.4253	18.7215	18.407	18.7743	18.4812	18.7281	sp	+	119	1793	18.4378	18.7413	-0.303471	O95298	NDUC2_HUMAN	NADH dehydrogenase [ubiquinone] 1 subunit C2 (Complex I-B14.5b) (CI-B14.5b) (Human lung cancer oncogene 1 protein) (HLC-1) (NADH-ubiquinone oxidoreductase subunit B14.5b)	NDUFC2 HLC1	NDUFC2
18.1829	18.5147	18.1587	18.4934	18.2383	18.4775	sp	+	239	1278	18.1933	18.4952	-0.301926	Q9NR28	DBLOH_HUMAN	Diablo homolog, mitochondrial (Direct IAP-binding protein with low pI) (Second mitochondria-derived activator of caspase) (Smac)	DIABLO SMAC	DIABLO
20.7449	21.0739	20.7674	21.0604	20.7587	21.0292	sp	+	366	684	20.757	21.0545	-0.297497	P50213	IDH3A_HUMAN	Isocitrate dehydrogenase [NAD] subunit alpha, mitochondrial (EC 1.1.1.41) (Isocitric dehydrogenase subunit alpha) (NAD(+)-specific ICDH subunit alpha)	IDH3A	IDH3A
19.2093	19.4696	19.2405	19.5009	19.1479	19.5031	sp	+	1621	43	19.1992	19.4912	-0.291977	P48681	NEST_HUMAN	Nestin	NES Nbla00170	NES
14.0288	14.3476	14.095	14.349	14.0487	14.3376	sp	+	390	1863	14.0575	14.3447	-0.287279	Q8IVS2	FABD_HUMAN	Malonyl-CoA-acyl carrier protein transacylase, mitochondrial (MCT) (EC 2.3.1.39) (Mitochondrial malonyl CoA:ACP acyltransferase) (Mitochondrial malonyltransferase) ([Acyl-carrier-protein] malonyltransferase)	MCAT MT	MCAT
17.5267	17.8152	17.4845	17.8117	17.5372	17.7821	sp	+	535	468	17.5161	17.803	-0.286879	O15460-2	P4HA2_HUMAN	Prolyl 4-hydroxylase subunit alpha-2 (4-PH alpha-2) (EC 1.14.11.2) (Procollagen-proline,2-oxoglutarate-4-dioxygenase subunit alpha-2)	P4HA2 UNQ290/PRO330	P4HA2
17.7163	18.0287	17.7025	17.9525	17.6967	17.976	sp	+	547	853	17.7052	17.9857	-0.280544	P22307	NLTP_HUMAN	Non-specific lipid-transfer protein (NSL-TP) (EC 2.3.1.176) (Propanoyl-CoA C-acyltransferase) (SCP-chi) (SCPX) (Sterol carrier protein 2) (SCP-2) (Sterol carrier protein X) (SCP-X)	SCP2	SCP2
19.7083	19.9784	19.6752	19.9731	19.7122	19.9823	sp	+	172	1001	19.6986	19.9779	-0.279375	P51970	NDUA8_HUMAN	NADH dehydrogenase [ubiquinone] 1 alpha subcomplex subunit 8 (Complex I-19kD) (CI-19kD) (Complex I-PGIV) (CI-PGIV) (NADH-ubiquinone oxidoreductase 19 kDa subunit)	NDUFA8	NDUFA8
21.516	21.7921	21.5171	21.7987	21.5445	21.8163	sp	+	780	73	21.5259	21.8024	-0.276506	Q99798	ACON_HUMAN	Aconitate hydratase, mitochondrial (Aconitase) (EC 4.2.1.3) (Citrate hydro-lyase)	ACO2	ACO2
20.2187	20.4454	20.1883	20.4659	20.2161	20.4539	sp	+	390	253	20.2077	20.4551	-0.24737	P08559	ODPA_HUMAN	Pyruvate dehydrogenase E1 component subunit alpha, somatic form, mitochondrial (EC 1.2.4.1) (PDHE1-A type I)	PDHA1 PHE1A	PDHA1
20.2675	20.0273	20.2697	20.0199	20.2927	20.032	sp	+	707	1537	20.2766	20.0264	0.250237	Q6NZY4	ZCHC8_HUMAN	Zinc finger CCHC domain-containing protein 8 (TRAMP-like complex RNA-binding factor ZCCHC8)	ZCCHC8	ZCCHC8
20.7778	20.5373	20.7849	20.559	20.8046	20.5201	sp	+	1754	250	20.7891	20.5388	0.25033	P39060	COIA1_HUMAN	Collagen alpha-1(XVIII) chain [Cleaved into: Endostatin;Non-collagenous domain 1 (NC1)]	COL18A1	COL18A1
18.7892	18.5243	18.7578	18.5225	18.7909	18.4801	sp	+	340	656	18.7793	18.5089	0.27035	P62879	GBB2_HUMAN	Guanine nucleotide-binding protein G(I)/G(S)/G(T) subunit beta-2 (G protein subunit beta-2) (Transducin beta chain 2)	GNB2	GNB2
21.5845	21.3276	21.597	21.3257	21.646	21.3462	cont	+	NaN	79	21.6092	21.3332	0.275999	1	sp
17.5808	17.2805	17.5829	17.29	17.5944	17.3271	sp	+	2002	91	17.586	17.2992	0.286829	Q7RTP6	MICA3_HUMAN	[F-actin]-monooxygenase MICAL3 (EC 1.14.13.225) (Molecule interacting with CasL protein 3) (MICAL-3)	MICAL3 KIAA0819 KIAA1364	MICAL3
20.85	20.5863	20.8598	20.5387	20.8635	20.5692	tr	+	1274	29	20.8578	20.5647	0.293034	A8MXZ9	A8MXZ9_HUMAN	Myosin-binding protein C, cardiac-type	MYBPC3	MYBPC3
16.6009	16.3545	16.7036	16.3209	16.6378	16.3609	sp	+	92	2686	16.6474	16.3454	0.30201	O00168	PLM_HUMAN	Phospholemman (FXYD domain-containing ion transport regulator 1) (Sodium/potassium-transporting ATPase subunit FXYD1)	FXYD1 PLM	FXYD1
19.6021	19.3446	19.6527	19.3207	19.6421	19.3097	sp	+	646	301	19.6323	19.325	0.307316	P43121	MUC18_HUMAN	Cell surface glycoprotein MUC18 (Cell surface glycoprotein P1H12) (Melanoma cell adhesion molecule) (Melanoma-associated antigen A32) (Melanoma-associated antigen MUC18) (S-endo 1 endothelial-associated antigen) (CD antigen CD146)	MCAM MUC18	MCAM
17.718	17.4349	17.7812	17.4357	17.7087	17.4135	sp	+	399	1943	17.736	17.4281	0.307917	O43813	LANC1_HUMAN	Glutathione S-transferase LANCL1 (EC 2.5.1.18) (40 kDa erythrocyte membrane protein) (p40) (LanC-like protein 1)	LANCL1 GPR69A	LANCL1
21.4186	21.0905	21.3835	21.0913	21.4113	21.0893	sp	+	334	314	21.4045	21.0904	0.314123	P07195	LDHB_HUMAN	L-lactate dehydrogenase B chain (LDH-B) (EC 1.1.1.27) (LDH heart subunit) (LDH-H) (Renal carcinoma antigen NY-REN-46)	LDHB	LDHB
19.9462	19.649	19.9838	19.6623	19.9656	19.6352	sp	+	1532	32	19.9652	19.6489	0.316368	P35573	GDE_HUMAN	Glycogen debranching enzyme (Glycogen debrancher) [Includes: 4-alpha-glucanotransferase (EC 2.4.1.25) (Oligo-1,4-1,4-glucantransferase);Amylo-alpha-1,6-glucosidase (Amylo-1,6-glucosidase) (EC 3.2.1.33) (Dextrin 6-alpha-D-glucosidase)]	AGL GDE	AGL
17.5142	17.1976	17.4772	17.1178	17.5395	17.2605	tr	+	392	1335	17.5103	17.1919	0.318369	F5GYQ1	F5GYQ1_HUMAN	V-type proton ATPase subunit	ATP6V0D1	ATP6V0D1
19.3801	19.0961	19.3225	18.9932	19.3584	19.008	sp	+	567	240	19.3536	19.0324	0.321184	Q15124	PGM5_HUMAN	Phosphoglucomutase-like protein 5 (Aciculin) (Phosphoglucomutase-related protein) (PGM-RP)	PGM5 PGMRP	PGM5
19.2253	18.9146	19.2522	18.8869	19.2179	18.9217	sp	+	339	675	19.2318	18.9077	0.324055	O94905	ERLN2_HUMAN	Erlin-2 (Endoplasmic reticulum lipid raft-associated protein 2) (Stomatin-prohibitin-flotillin-HflC/K domain-containing protein 2) (SPFH domain-containing protein 2)	ERLIN2 C8orf2 SPFH2 UNQ2441/PRO5003/PRO9924	ERLIN2
19.1471	18.8267	19.1868	18.8749	19.1406	18.7923	sp	+	1609	149	19.1582	18.8313	0.326855	P11047	LAMC1_HUMAN	Laminin subunit gamma-1 (Laminin B2 chain) (Laminin-1 subunit gamma) (Laminin-10 subunit gamma) (Laminin-11 subunit gamma) (Laminin-2 subunit gamma) (Laminin-3 subunit gamma) (Laminin-4 subunit gamma) (Laminin-6 subunit gamma) (Laminin-7 subunit gamma) (Laminin-8 subunit gamma) (Laminin-9 subunit gamma) (S-laminin subunit gamma) (S-LAM gamma)	LAMC1 LAMB2	LAMC1
18.4944	18.1609	18.5041	18.2182	18.5517	18.1864	sp	+	538	1199	18.5167	18.1885	0.328249	Q92692-2	NECT2_HUMAN	Nectin-2 (Herpes virus entry mediator B) (Herpesvirus entry mediator B) (HveB) (Nectin cell adhesion molecule 2) (Poliovirus receptor-related protein 2) (CD antigen CD112)	NECTIN2 HVEB PRR2 PVRL2	NECTIN2
18.9049	18.585	18.9172	18.5823	18.9497	18.6174	sp	+	194	965	18.924	18.5949	0.329077	P50461	CSRP3_HUMAN	Cysteine and glycine-rich protein 3 (Cardiac LIM protein) (Cysteine-rich protein 3) (CRP3) (LIM domain protein, cardiac) (Muscle LIM protein)	CSRP3 CLP MLP	CSRP3
20.0273	19.7033	20.0738	19.7285	20.0558	19.7311	tr	+	196	426	20.0523	19.721	0.331312	A0A1C7CYY4	A0A1C7CYY4_HUMAN	Myosin light chain 4 (Fragment)	MYL4	MYL4
17.5176	17.1617	17.5334	17.2327	17.5588	17.2168	tr	+	416	1445	17.5366	17.2037	0.332893	J3KQ32	J3KQ32_HUMAN	Obg-like ATPase 1	OLA1	OLA1
19.2736	19.0198	19.3288	18.9295	19.336	18.9878	sp	+	249	724	19.3128	18.979	0.333735	Q06323	PSME1_HUMAN	Proteasome activator complex subunit 1 (11S regulator complex subunit alpha) (REG-alpha) (Activator of multicatalytic protease subunit 1) (Interferon gamma up-regulated I-5111 protein) (IGUP I-5111) (Proteasome activator 28 subunit alpha) (PA28a) (PA28alpha)	PSME1 IFI5111	PSME1
17.5182	17.1831	17.5138	17.2276	17.5388	17.1539	sp	+	322	1279	17.5236	17.1882	0.335392	Q00577	PURA_HUMAN	Transcriptional activator protein Pur-alpha (Purine-rich single-stranded DNA-binding protein alpha)	PURA PUR1	PURA
19.3515	19.0382	19.3496	19.0176	19.3782	19.016	tr	+	410	901	19.3598	19.0239	0.335852	A0A1B0GWE8	A0A1B0GWE8_HUMAN	Cathepsin D	CTSD	CTSD
21.1409	20.8066	21.1563	20.8504	21.1613	20.778	sp	+	334	515	21.1529	20.8117	0.341164	P40925	MDHC_HUMAN	Malate dehydrogenase, cytoplasmic (EC 1.1.1.37) (Cytosolic malate dehydrogenase) (Diiodophenylpyruvate reductase) (EC 1.1.1.96)	MDH1 MDHA	MDH1
18.0672	17.6253	18.0618	17.6767	17.9088	17.6987	tr	+	523	1775	18.0126	17.6669	0.345715	H0YHG0	H0YHG0_HUMAN	Uncharacterized protein (Fragment)
21.6826	21.3532	21.8038	21.4274	21.8017	21.4627	sp	+	205	367	21.7627	21.4144	0.348263	P04792	HSPB1_HUMAN	Heat shock protein beta-1 (HspB1) (28 kDa heat shock protein) (Estrogen-regulated 24 kDa protein) (Heat shock 27 kDa protein) (HSP 27) (Stress-responsive protein 27) (SRP27)	HSPB1 HSP27 HSP28	HSPB1
16.2621	15.8961	16.2138	15.9195	16.193	15.8056	sp	+	998	1095	16.223	15.8738	0.349181	P54753	EPHB3_HUMAN	Ephrin type-B receptor 3 (EC 2.7.10.1) (EPH-like tyrosine kinase 2) (EPH-like kinase 2) (Embryonic kinase 2) (EK2) (hEK2) (Tyrosine-protein kinase TYRO6)	EPHB3 ETK2 HEK2 TYRO6	EPHB3
19.3428	19.0747	19.4033	18.9944	19.3329	18.9557	sp	+	364	846	19.3597	19.0083	0.351364	Q9HBU9	POPD2_HUMAN	Popeye domain-containing protein 2 (Popeye protein 2)	POPDC2 POP2	POPDC2
20.3823	20.0786	20.4231	20.0435	20.449	20.0688	sp	+	1100	51	20.4181	20.0637	0.354454	O94875-10	SRBS2_HUMAN	Sorbin and SH3 domain-containing protein 2 (Arg-binding protein 2) (ArgBP2) (Arg/Abl-interacting protein 2) (Sorbin)	SORBS2 ARGBP2 KIAA0777	SORBS2
19.1825	18.8264	19.1419	18.7805	19.2051	18.8424	sp	+	229	814	19.1765	18.8164	0.360071	Q9BRX8	F213A_HUMAN	Peroxiredoxin-like 2A (Peroxiredoxin-like 2 activated in M-CSF stimulated monocytes) (Protein PAMM) (Redox-regulatory protein FAM213A)	PRXL2A C10orf58 FAM213A PAMM PRO2290 PSEC0139 UNQ611/PRO1198	PRXL2A
15.8951	15.5447	15.7654	15.4191	15.865	15.4712	sp	+	331	2026	15.8418	15.4783	0.363519	Q9Y266	NUDC_HUMAN	Nuclear migration protein nudC (Nuclear distribution protein C homolog)	NUDC	NUDC
16.8523	16.4083	16.7825	16.4907	16.8811	16.5221	sp	+	1700	266	16.8386	16.4737	0.364944	Q2M3C7	SPKAP_HUMAN	A-kinase anchor protein SPHKAP (SPHK1-interactor and AKAP domain-containing protein) (Sphingosine kinase type 1-interacting protein)	SPHKAP KIAA1678 SKIP	SPHKAP
18.7892	18.3323	18.7781	18.4824	18.8341	18.486	sp	+	2137	17	18.8005	18.4336	0.366898	P11277-2	SPTB1_HUMAN	Spectrin beta chain, erythrocytic (Beta-I spectrin)	SPTB SPTB1	SPTB
17.5735	17.1934	17.5465	17.184	17.6177	17.229	sp	+	540	718	17.5792	17.2021	0.377092	Q7Z434	MAVS_HUMAN	Mitochondrial antiviral-signaling protein (MAVS) (CARD adapter inducing interferon beta) (Cardif) (Interferon beta promoter stimulator protein 1) (IPS-1) (Putative NF-kappa-B-activating protein 031N) (Virus-induced-signaling adapter) (VISA)	MAVS IPS1 KIAA1271 VISA	MAVS
16.7375	16.2493	16.7279	16.4286	16.7709	16.4056	tr	+	758	1402	16.7455	16.3612	0.384268	A0A0A0MTN0	A0A0A0MTN0_HUMAN	Cullin-2	CUL2	CUL2
17.0694	16.6266	17.0022	16.6209	17.0102	16.6793	sp	+	596	2349	17.0272	16.6423	0.384996	Q96HC4	PDLI5_HUMAN	PDZ and LIM domain protein 5 (Enigma homolog) (Enigma-like PDZ and LIM domains protein)	PDLIM5 ENH L9	PDLIM5
17.2163	16.8219	17.303	16.9669	17.2814	16.8549	sp	+	736	510	17.2669	16.8812	0.385637	O00429	DNM1L_HUMAN	Dynamin-1-like protein (EC 3.6.5.5) (Dnm1p/Vps1p-like protein) (DVLP) (Dynamin family member proline-rich carboxyl-terminal domain less) (Dymple) (Dynamin-like protein) (Dynamin-like protein 4) (Dynamin-like protein IV) (HdynIV) (Dynamin-related protein 1)	DNM1L DLP1 DRP1	DNM1L
18.4662	18.1644	18.5123	18.0308	18.468	18.0914	sp	+	1450	129	18.4822	18.0955	0.386654	Q6ZP82	CC141_HUMAN	Coiled-coil domain-containing protein 141 (Coiled-coil protein associated with myosin II and DISC1)	CCDC141 CAMDI	CCDC141
15.3941	15.092	15.3112	14.9093	15.3751	14.9099	sp	+	595	2649	15.3601	14.9704	0.38973	Q92908	GATA6_HUMAN	Transcription factor GATA-6 (GATA-binding factor 6)	GATA6	GATA6
21.533	21.1366	21.5412	21.1537	21.5493	21.1617	sp	+	784	90	21.5412	21.1506	0.390556	Q01813	PFKAP_HUMAN	ATP-dependent 6-phosphofructokinase, platelet type (ATP-PFK) (PFK-P) (EC 2.7.1.11) (6-phosphofructokinase type C) (Phosphofructo-1-kinase isozyme C) (PFK-C) (Phosphohexokinase)	PFKP PFKF	PFKP
20.8788	20.4797	20.797	20.4301	20.8809	20.4744	sp	+	1134	30	20.8522	20.4614	0.390823	P18206	VINC_HUMAN	Vinculin (Metavinculin) (MV)	VCL	VCL
22.2257	21.8821	22.2341	21.8238	22.2288	21.8035	sp	+	858	105	22.2295	21.8365	0.393057	P13591	NCAM1_HUMAN	Neural cell adhesion molecule 1 (N-CAM-1) (NCAM-1) (CD antigen CD56)	NCAM1 NCAM	NCAM1
14.6667	14.2177	14.5087	14.1647	14.5559	14.1596	sp	+	423	2484	14.5771	14.1806	0.39649	P11474	ERR1_HUMAN	Steroid hormone receptor ERR1 (Estrogen receptor-like 1) (Estrogen-related receptor alpha) (ERR-alpha) (Nuclear receptor subfamily 3 group B member 1)	ESRRA ERR1 ESRL1 NR3B1	ESRRA
20.7415	20.3534	20.7742	20.3606	20.7589	20.3576	sp	+	894	33	20.7582	20.3572	0.401018	P35609	ACTN2_HUMAN	Alpha-actinin-2 (Alpha-actinin skeletal muscle isoform 2) (F-actin cross-linking protein)	ACTN2	ACTN2
20.0658	19.587	20.0632	19.6979	20.1009	19.7396	sp	+	1843	18	20.0766	19.6748	0.401781	Q702N8	XIRP1_HUMAN	Xin actin-binding repeat-containing protein 1 (Cardiomyopathy-associated protein 1)	XIRP1 CMYA1 XIN	XIRP1
16.0017	15.6613	16.0177	15.5046	15.9829	15.6165	tr	+	485	1373	16.0008	15.5941	0.406628	H0YDU8	H0YDU8_HUMAN	Serine/threonine-protein phosphatase (EC 3.1.3.16) (Fragment)	PPP5C	PPP5C
17.2958	16.9371	17.2538	16.8608	17.3772	16.9071	sp	+	583	1066	17.3089	16.9017	0.40724	Q13740	CD166_HUMAN	CD166 antigen (Activated leukocyte cell adhesion molecule) (CD antigen CD166)	ALCAM MEMD	ALCAM
17.183	16.8558	17.2163	16.7229	17.1545	16.7449	sp	+	126	1914	17.1846	16.7745	0.41007	P49773	HINT1_HUMAN	Histidine triad nucleotide-binding protein 1 (EC 3.-.-.-) (Adenosine 5'-monophosphoramidase) (Protein kinase C inhibitor 1) (Protein kinase C-interacting protein 1) (PKCI-1)	HINT1 HINT PKCI1 PRKCNH1	HINT1
17.1979	16.7597	17.1563	16.7236	17.1274	16.7607	sp	+	660	1149	17.1605	16.748	0.41251	Q08289	CACB2_HUMAN	Voltage-dependent L-type calcium channel subunit beta-2 (CAB2) (Calcium channel voltage-dependent subunit beta 2) (Lambert-Eaton myasthenic syndrome antigen B) (MYSB)	CACNB2 CACNLB2 MYSB	CACNB2
16.7507	16.4015	16.6806	16.1776	16.5903	16.2041	sp	+	1053	1301	16.6739	16.261	0.412819	Q9BXX0	EMIL2_HUMAN	EMILIN-2 (Elastin microfibril interface-located protein 2) (Elastin microfibril interfacer 2) (Protein FOAP-10)	EMILIN2	EMILIN2
18.8464	18.3429	18.8617	18.4023	18.8258	18.5477	sp	+	659	574	18.8447	18.431	0.413696	P28288	ABCD3_HUMAN	ATP-binding cassette sub-family D member 3 (70 kDa peroxisomal membrane protein) (PMP70)	ABCD3 PMP70 PXMP1	ABCD3
16.1778	15.6953	16.0611	15.7396	16.0884	15.6491	sp	+	277	2173	16.1091	15.6947	0.414436	Q5BKY1	LRC10_HUMAN	Leucine-rich repeat-containing protein 10	LRRC10	LRRC10
15.3289	15.0294	15.3967	14.8742	15.3027	14.8808	sp	+	253	1726	15.3428	14.9281	0.414653	P15259	PGAM2_HUMAN	Phosphoglycerate mutase 2 (EC 5.4.2.11) (EC 5.4.2.4) (BPG-dependent PGAM 2) (Muscle-specific phosphoglycerate mutase) (Phosphoglycerate mutase isozyme M) (PGAM-M)	PGAM2 PGAMM	PGAM2
17.4492	16.9214	17.5092	17.1371	17.4134	17.0485	tr	+	464	1078	17.4573	17.0357	0.421604	A0A1B0GV45	A0A1B0GV45_HUMAN	Unconventional myosin-XVIIIa (Fragment)	MYO18A	MYO18A
20.611	20.1826	20.6113	20.2391	20.626	20.1592	sp	+	906	376	20.6161	20.1937	0.422421	P19022	CADH2_HUMAN	Cadherin-2 (CDw325) (Neural cadherin) (N-cadherin) (CD antigen CD325)	CDH2 CDHN NCAD	CDH2
15.7546	15.477	15.7772	15.292	15.8142	15.3019	sp	+	434	1092	15.782	15.357	0.42502	Q53EU6	GPAT3_HUMAN	Glycerol-3-phosphate acyltransferase 3 (GPAT-3) (EC 2.3.1.15) (1-acyl-sn-glycerol-3-phosphate O-acyltransferase 10) (AGPAT 10) (1-acyl-sn-glycerol-3-phosphate O-acyltransferase 9) (1-AGP acyltransferase 9) (1-AGPAT 9) (EC 2.3.1.51) (Acyl-CoA:glycerol-3-phosphate acyltransferase 3) (hGPAT3) (Lung cancer metastasis-associated protein 1) (Lysophosphatidic acid acyltransferase theta) (LPAAT-theta) (M…	GPAT3 AGPAT9 MAG1 HMFN0839 UNQ2753/PRO6492	GPAT3
16.6228	16.0749	16.5281	16.0585	16.4481	16.1576	sp	+	583	1442	16.533	16.097	0.436026	Q8NHH9-5	ATLA2_HUMAN	Atlastin-2 (EC 3.6.5.-) (ADP-ribosylation factor-like protein 6-interacting protein 2) (ARL-6-interacting protein 2) (Aip-2)	ATL2 ARL6IP2	ATL2
20.216	19.6595	20.1107	19.7123	20.1784	19.8133	sp	+	508	333	20.1684	19.7284	0.439983	Q16851	UGPA_HUMAN	UTP--glucose-1-phosphate uridylyltransferase (EC 2.7.7.9) (UDP-glucose pyrophosphorylase) (UDPGP) (UGPase)	UGP2 UGP1	UGP2
16.3642	16.016	16.4768	16.0684	16.5263	15.9618	sp	+	758	2559	16.4558	16.0154	0.440367	Q12797-4	ASPH_HUMAN	Aspartyl/asparaginyl beta-hydroxylase (EC 1.14.11.16) (Aspartate beta-hydroxylase) (ASP beta-hydroxylase) (Peptide-aspartate beta-dioxygenase)	ASPH BAH	ASPH
16.2126	15.917	16.3595	15.6994	16.1708	15.789	sp	+	313	1292	16.2476	15.8018	0.445807	O43765	SGTA_HUMAN	Small glutamine-rich tetratricopeptide repeat-containing protein alpha (Alpha-SGT) (Vpu-binding protein) (UBP)	SGTA SGT SGT1	SGTA
17.657	17.1258	17.6872	17.2566	17.6134	17.2375	sp	+	3122	94	17.6525	17.2066	0.445889	P24043	LAMA2_HUMAN	Laminin subunit alpha-2 (Laminin M chain) (Laminin-12 subunit alpha) (Laminin-2 subunit alpha) (Laminin-4 subunit alpha) (Merosin heavy chain)	LAMA2 LAMM	LAMA2
17.4519	16.9818	17.4629	17.0181	17.4306	17.0057	sp	+	788	2711	17.4485	17.0019	0.446611	Q8IV36	HID1_HUMAN	Protein HID1 (Down-regulated in multiple cancers 1) (HID1 domain-containing protein) (Protein hid-1 homolog)	HID1 C17orf28 DMC1	HID1
17.2301	16.761	17.0507	16.7771	17.2647	16.6521	tr	+	1160	604	17.1819	16.7301	0.451767	A0A0C4DG76	A0A0C4DG76_HUMAN	Hephaestin (Hephaestin, isoform CRA_c)	HEPH hCG_18329	HEPH
16.6362	16.1606	16.4565	15.9976	16.5728	16.1452	tr	+	430	2486	16.5552	16.1011	0.454046	A0A087X0U3	A0A087X0U3_HUMAN	Amino acid transporter	SLC1A3	SLC1A3
17.3837	16.854	17.4906	17.1528	17.4356	16.9405	sp	+	1697	551	17.4366	16.9825	0.454163	Q9NZM3	ITSN2_HUMAN	Intersectin-2 (SH3 domain-containing protein 1B) (SH3P18) (SH3P18-like WASP-associated protein)	ITSN2 KIAA1256 SH3D1B SWAP	ITSN2
20.9691	20.5466	21.0077	20.5178	21.0177	20.565	sp	+	1023	39	20.9982	20.5431	0.455015	P05023	AT1A1_HUMAN	Sodium/potassium-transporting ATPase subunit alpha-1 (Na(+)/K(+) ATPase alpha-1 subunit) (EC 7.2.2.13) (Sodium pump subunit alpha-1)	ATP1A1	ATP1A1
15.1449	14.8314	15.2524	14.6358	15.1339	14.6985	sp	+	206	1788	15.1771	14.7219	0.45516	P30043	BLVRB_HUMAN	Flavin reductase (NADPH) (FR) (EC 1.5.1.30) (Biliverdin reductase B) (BVR-B) (EC 1.3.1.24) (Biliverdin-IX beta-reductase) (Green heme-binding protein) (GHBP) (NADPH-dependent diaphorase) (NADPH-flavin reductase) (FLR)	BLVRB FLR	BLVRB
18.5697	17.9852	18.3282	18.0077	18.6078	18.145	sp	+	807	658	18.5019	18.0459	0.455971	Q9HCB6	SPON1_HUMAN	Spondin-1 (F-spondin) (Vascular smooth muscle cell growth-promoting factor)	SPON1 KIAA0762 VSGP	SPON1
17.5698	17.1873	17.613	17.2565	17.5932	16.9609	sp	+	788	561	17.592	17.1349	0.457104	P49321	NASP_HUMAN	Nuclear autoantigenic sperm protein (NASP)	NASP	NASP
19.9499	19.475	19.9624	19.5239	19.9963	19.5348	sp	+	4967	4	19.9695	19.5113	0.458288	Q92736-2	RYR2_HUMAN	Ryanodine receptor 2 (RYR-2) (RyR2) (hRYR-2) (Cardiac muscle ryanodine receptor) (Cardiac muscle ryanodine receptor-calcium release channel) (Type 2 ryanodine receptor)	RYR2	RYR2
19.4946	19.0115	19.4653	19.0307	19.5124	19.042	sp	+	879	239	19.4907	19.0281	0.462635	Q9P2B2	FPRP_HUMAN	Prostaglandin F2 receptor negative regulator (CD9 partner 1) (CD9P-1) (Glu-Trp-Ile EWI motif-containing protein F) (EWI-F) (Prostaglandin F2-alpha receptor regulatory protein) (Prostaglandin F2-alpha receptor-associated protein) (CD antigen CD315)	PTGFRN CD9P1 EWIF FPRP KIAA1436	PTGFRN
19.0859	18.6134	19.0916	18.6555	19.1214	18.6416	sp	+	445	2021	19.0996	18.6368	0.462784	P68371	TBB4B_HUMAN	Tubulin beta-4B chain (Tubulin beta-2 chain) (Tubulin beta-2C chain)	TUBB4B TUBB2C	TUBB4B
16.8769	16.4146	16.8641	16.4219	16.9068	16.4203	sp	+	231	2013	16.8826	16.4189	0.463646	Q15102	PA1B3_HUMAN	Platelet-activating factor acetylhydrolase IB subunit gamma (EC 3.1.1.47) (PAF acetylhydrolase 29 kDa subunit) (PAF-AH 29 kDa subunit) (PAF-AH subunit gamma) (PAFAH subunit gamma)	PAFAH1B3 PAFAHG	PAFAH1B3
21.7259	21.2563	21.6865	21.2296	21.7284	21.2494	sp	+	881	54	21.7136	21.2451	0.4685	Q99959-2	PKP2_HUMAN	Plakophilin-2	PKP2	PKP2
18.4385	18.0383	18.4218	17.9393	18.4504	17.9271	sp	+	72	1819	18.4369	17.9682	0.468691	Q9UBI6	GBG12_HUMAN	Guanine nucleotide-binding protein G(I)/G(S)/G(O) subunit gamma-12	GNG12	GNG12
18.852	18.3979	18.8818	18.3695	18.8502	18.3905	sp	+	208	1588	18.8613	18.386	0.475386	P52943	CRIP2_HUMAN	Cysteine-rich protein 2 (CRP-2) (Protein ESP1)	CRIP2 CRP2	CRIP2
17.1277	16.5631	16.9357	16.6261	17.0769	16.515	tr	+	340	1389	17.0468	16.5681	0.478712	A0A1B0GWJ6	A0A1B0GWJ6_HUMAN	Unconventional myosin-XVIIIa (Fragment)	MYO18A	MYO18A
18.9084	18.4191	18.987	18.516	18.9285	18.4423	tr	+	128	1998	18.9413	18.4592	0.482113	E9PR17	E9PR17_HUMAN	CD59 glycoprotein (1F5 antigen) (20 kDa homologous restriction factor) (HRF-20) (HRF20) (MAC-inhibitory protein) (MAC-IP) (MEM43 antigen) (Membrane attack complex inhibition factor) (MACIF) (Membrane inhibitor of reactive lysis) (MIRL) (Protectin) (CD antigen CD59)	CD59 MIC11 MIN1 MIN2 MIN3 MSK21	CD59
16.6033	16.1974	16.7483	16.2249	16.7749	16.2483	sp	+	282	1215	16.7089	16.2235	0.485344	P10768	ESTD_HUMAN	S-formylglutathione hydrolase (FGH) (EC 3.1.2.12) (Esterase D) (Methylumbelliferyl-acetate deacetylase) (EC 3.1.1.56)	ESD	ESD
14.6531	14.1913	14.6381	14.1518	14.5379	14.0288	sp	+	1759	1629	14.6097	14.124	0.485765	Q86V15	CASZ1_HUMAN	Zinc finger protein castor homolog 1 (Castor-related protein) (Putative survival-related protein) (Zinc finger protein 693)	CASZ1 CST SRG ZNF693	CASZ1
20.4507	19.9904	20.4859	19.9631	20.4405	19.9644	sp	+	413	350	20.459	19.9726	0.486425	P17174	AATC_HUMAN	Aspartate aminotransferase, cytoplasmic (cAspAT) (EC 2.6.1.1) (EC 2.6.1.3) (Cysteine aminotransferase, cytoplasmic) (Cysteine transaminase, cytoplasmic) (cCAT) (Glutamate oxaloacetate transaminase 1) (Transaminase A)	GOT1	GOT1
22.4762	22.0352	22.5007	22.0277	22.545	21.9976	sp	+	166	325	22.5073	22.0202	0.487123	P10916	MLRV_HUMAN	Myosin regulatory light chain 2, ventricular/cardiac muscle isoform (MLC-2) (MLC-2v) (Cardiac myosin light chain 2) (Myosin light chain 2, slow skeletal/ventricular muscle isoform) (MLC-2s/v) (Ventricular myosin light chain 2)	MYL2 MLC2	MYL2
16.3202	15.9304	16.3861	15.6201	16.2366	15.9246	sp	+	NaN	77	16.3143	15.825	0.489239	Q14697-2	GANAB_HUMAN
21.326	20.8672	21.3578	20.8553	21.3668	20.8542	sp	+	1935	6	21.3502	20.8589	0.491297	P12883	MYH7_HUMAN	Myosin-7 (Myosin heavy chain 7) (Myosin heavy chain slow isoform) (MyHC-slow) (Myosin heavy chain, cardiac muscle beta isoform) (MyHC-beta)	MYH7 MYHCB	MYH7
15.4563	15.0738	15.5048	14.9375	15.4577	14.9336	sp	+	472	1368	15.4729	14.9816	0.491308	Q13228	SBP1_HUMAN	Methanethiol oxidase (MTO) (EC 1.8.3.4) (56 kDa selenium-binding protein) (SBP56) (SP56) (Selenium-binding protein 1)	SELENBP1 SBP	SELENBP1
17.7815	17.3164	17.6134	17.1301	17.7291	17.1959	sp	+	224	1068	17.708	17.2141	0.493876	Q9Y235	ABEC2_HUMAN	C->U-editing enzyme APOBEC-2 (EC 3.5.4.36) (mRNA(cytosine(6666)) deaminase 2)	APOBEC2	APOBEC2
15.7451	15.3617	15.5328	15.1298	15.7565	15.0499	sp	+	192	2262	15.6781	15.1805	0.497655	Q07812	BAX_HUMAN	Apoptosis regulator BAX (Bcl-2-like protein 4) (Bcl2-L-4)	BAX BCL2L4	BAX
16.9827	16.4159	17.0598	16.7636	17.0694	16.4383	sp	+	610	813	17.0373	16.5393	0.498037	O14967	CLGN_HUMAN	Calmegin	CLGN	CLGN
16.007	15.6011	16.0407	15.5005	16.0164	15.4622	sp	+	489	2081	16.0213	15.5213	0.50009	P58335	ANTR2_HUMAN	Anthrax toxin receptor 2 (Capillary morphogenesis gene 2 protein) (CMG-2)	ANTXR2 CMG2	ANTXR2
17.597	17.0422	17.6024	17.0259	17.5346	17.1653	sp	+	424	791	17.578	17.0778	0.50024	Q9UKS6	PACN3_HUMAN	Protein kinase C and casein kinase substrate in neurons protein 3 (SH3 domain-containing protein 6511)	PACSIN3	PACSIN3
15.2305	14.8854	15.3042	14.8344	15.3604	14.6697	tr	+	204	2462	15.2984	14.7965	0.501878	A0A087WUW9	A0A087WUW9_HUMAN	ADP-ribosylation factor-like protein 15	ARL15	ARL15
18.7639	18.197	18.8332	18.367	18.7775	18.3028	sp	+	476	779	18.7915	18.2889	0.502615	Q9H3G5	CPVL_HUMAN	Probable serine carboxypeptidase CPVL (EC 3.4.16.-) (Carboxypeptidase, vitellogenic-like) (Vitellogenic carboxypeptidase-like protein) (VCP-like protein) (hVLP)	CPVL VLP PSEC0124 UNQ197/PRO223	CPVL
20.0934	19.5971	20.0704	19.5552	20.005	19.4934	sp	+	895	62	20.0563	19.5486	0.507681	Q9UI47	CTNA3_HUMAN	Catenin alpha-3 (Alpha T-catenin) (Cadherin-associated protein)	CTNNA3	CTNNA3
15.6178	15.25	15.709	15.2435	15.8006	15.1106	sp	+	6885	80	15.7091	15.2013	0.507772	Q8WXH0	SYNE2_HUMAN	Nesprin-2 (KASH domain-containing protein 2) (KASH2) (Nuclear envelope spectrin repeat protein 2) (Nucleus and actin connecting element protein) (Protein NUANCE) (Synaptic nuclear envelope protein 2) (Syne-2)	SYNE2 KIAA1011 NUA	SYNE2
13.6174	13.3035	13.7082	13.1322	13.7899	13.1389	sp	+	507	2298	13.7052	13.1915	0.513638	Q01650	LAT1_HUMAN	Large neutral amino acids transporter small subunit 1 (4F2 light chain) (4F2 LC) (4F2LC) (CD98 light chain) (Integral membrane protein E16) (E16) (L-type amino acid transporter 1) (hLAT1) (Solute carrier family 7 member 5) (y+ system cationic amino acid transporter)	SLC7A5 CD98LC LAT1 MPE16	SLC7A5
22.5787	22.0642	22.5757	22.0471	22.5852	22.0644	sp	+	2725	2	22.5799	22.0586	0.521263	Q14315	FLNC_HUMAN	Filamin-C (FLN-C) (FLNc) (ABP-280-like protein) (ABP-L) (Actin-binding-like protein) (Filamin-2) (Gamma-filamin)	FLNC ABPL FLN2	FLNC
21.2145	20.7021	21.2188	20.7114	21.2287	20.6763	sp	+	745	102	21.2206	20.6966	0.524042	P14923	PLAK_HUMAN	Junction plakoglobin (Catenin gamma) (Desmoplakin III) (Desmoplakin-3)	JUP CTNNG DP3	JUP
15.748	15.1254	15.5618	15.2415	15.8302	15.1925	sp	+	381	2609	15.7134	15.1865	0.526887	Q03113	GNA12_HUMAN	Guanine nucleotide-binding protein subunit alpha-12 (G alpha-12) (G-protein subunit alpha-12)	GNA12	GNA12
14.4492	14.0168	14.4864	13.9476	14.3946	13.7823	sp	+	386	2256	14.4434	13.9156	0.527825	Q86VN1	VPS36_HUMAN	Vacuolar protein-sorting-associated protein 36 (ELL-associated protein of 45 kDa) (ESCRT-II complex subunit VPS36)	VPS36 C13orf9 EAP45 CGI-145	VPS36
18.1783	17.6434	18.2253	17.7846	18.2743	17.6639	sp	+	932	823	18.226	17.6973	0.528639	Q86TD4-2	SRCA_HUMAN	Sarcalumenin	SRL	SRL
21.8449	21.2924	21.8301	21.3105	21.8334	21.3152	sp	+	303	866	21.8361	21.306	0.530119	P05026	AT1B1_HUMAN	Sodium/potassium-transporting ATPase subunit beta-1 (Sodium/potassium-dependent ATPase subunit beta-1)	ATP1B1 ATP1B	ATP1B1
18.5898	18.0876	18.6054	18.0705	18.6751	18.109	tr	+	449	2502	18.6235	18.089	0.534414	K7N7A8	K7N7A8_HUMAN	DUF4205 domain-containing protein (Fragment)
20.2245	19.69	20.1502	19.6467	20.2164	19.6507	tr	+	642	238	20.197	19.6625	0.534548	A0A0G2JIW1	A0A0G2JIW1_HUMAN	Heat shock 70 kDa protein 1B	HSPA1B	HSPA1B
17.1345	16.7712	16.9429	16.3902	17.1152	16.381	sp	+	1422	475	17.0642	16.5141	0.550097	Q2V2M9-4	FHOD3_HUMAN	FH1/FH2 domain-containing protein 3 (Formactin-2) (Formin homolog overexpressed in spleen 2) (hFHOS2)	FHOD3 FHOS2 KIAA1695	FHOD3
17.8733	17.446	17.8	17.0017	17.8542	17.4204	sp	+	3695	75	17.8425	17.2894	0.553135	O15230	LAMA5_HUMAN	Laminin subunit alpha-5 (Laminin-10 subunit alpha) (Laminin-11 subunit alpha) (Laminin-15 subunit alpha)	LAMA5 KIAA0533 KIAA1907	LAMA5
19.9164	19.3622	19.9522	19.312	19.7485	19.2713	sp	+	175	880	19.8724	19.3152	0.55719	P02511	CRYAB_HUMAN	Alpha-crystallin B chain (Alpha(B)-crystallin) (Heat shock protein beta-5) (HspB5) (Renal carcinoma antigen NY-REN-27) (Rosenthal fiber component)	CRYAB CRYA2 HSPB5	CRYAB
17.8673	17.1398	17.8016	17.4056	17.892	17.309	tr	+	1967	144	17.8536	17.2848	0.568821	A0A0U1RQK4	A0A0U1RQK4_HUMAN	[Protein ADP-ribosylarginine] hydrolase-like protein 1	ADPRHL1	ADPRHL1
17.5148	17.0459	17.5462	16.8893	17.4701	16.8799	sp	+	375	1378	17.5104	16.9384	0.572004	Q99733	NP1L4_HUMAN	Nucleosome assembly protein 1-like 4 (Nucleosome assembly protein 2) (NAP-2)	NAP1L4 NAP2	NAP1L4
20.1236	19.5166	20.1066	19.4485	19.9661	19.4863	sp	+	931	71	20.0654	19.4838	0.581631	Q8IWX7	UN45B_HUMAN	Protein unc-45 homolog B (Unc-45B) (SMUNC45)	UNC45B CMYA4 UNC45	UNC45B
20.8435	20.2409	20.8273	20.2486	20.8405	20.2613	sp	+	628	267	20.8371	20.2503	0.586781	P50895	BCAM_HUMAN	Basal cell adhesion molecule (Auberger B antigen) (B-CAM cell surface glycoprotein) (F8/G253 antigen) (Lutheran antigen) (Lutheran blood group glycoprotein) (CD antigen CD239)	BCAM LU MSK19	BCAM
19.1345	18.5456	19.1389	18.5743	19.1593	18.5508	tr	+	2038	35	19.1442	18.5569	0.587339	A0A0D9SFK2	A0A0D9SFK2_HUMAN	Unconventional myosin-XVIIIa	MYO18A	MYO18A
18.1907	17.6046	18.2239	17.6326	18.2033	17.603	sp	+	253	444	18.206	17.6134	0.59256	Q9Y696	CLIC4_HUMAN	Chloride intracellular channel protein 4 (Intracellular chloride ion channel protein p64H1)	CLIC4	CLIC4
18.8144	18.2416	18.9181	18.2379	18.8247	18.2896	sp	+	323	681	18.8524	18.2564	0.596029	P12429	ANXA3_HUMAN	Annexin A3 (35-alpha calcimedin) (Annexin III) (Annexin-3) (Inositol 1,2-cyclic phosphate 2-phosphohydrolase) (Lipocortin III) (Placental anticoagulant protein III) (PAP-III)	ANXA3 ANX3	ANXA3
15.5864	14.8155	15.3826	15.0299	15.4165	14.7387	sp	+	672	2050	15.4618	14.8614	0.600423	P17252	KPCA_HUMAN	Protein kinase C alpha type (PKC-A) (PKC-alpha) (EC 2.7.11.13)	PRKCA PKCA PRKACA	PRKCA
16.2075	15.5454	16.1537	15.6821	16.0668	15.3806	sp	+	545	974	16.1427	15.536	0.606632	Q9UEW8	STK39_HUMAN	STE20/SPS1-related proline-alanine-rich protein kinase (Ste-20-related kinase) (EC 2.7.11.1) (DCHT) (Serine/threonine-protein kinase 39)	STK39 SPAK	STK39
20.5739	19.9759	20.557	19.9671	20.5849	19.9465	sp	+	1014	42	20.5719	19.9631	0.608782	O76041	NEBL_HUMAN	Nebulette (Actin-binding Z-disk protein)	NEBL LNEBL	NEBL
19.9281	19.3285	19.9109	19.2406	19.9829	19.4142	sp	+	4391	12	19.9406	19.3278	0.612854	P98160	PGBM_HUMAN	Basement membrane-specific heparan sulfate proteoglycan core protein (HSPG) (Perlecan) (PLC) [Cleaved into: Endorepellin;LG3 peptide]	HSPG2	HSPG2
18.8675	18.5985	19.1144	18.3774	19.1189	18.2823	tr	+	956	273	19.0336	18.4194	0.614214	E9PDC3	E9PDC3_HUMAN	Armadillo repeat protein deleted in velo-cardio-facial syndrome	ARVCF	ARVCF
13.7436	13.1544	13.5424	13.1968	13.7703	12.8549	sp	+	450	2038	13.6854	13.0687	0.616712	P41240	CSK_HUMAN	Tyrosine-protein kinase CSK (EC 2.7.10.2) (C-Src kinase) (Protein-tyrosine kinase CYL)	CSK	CSK
19.4933	19.057	19.3959	18.9103	19.6826	18.7465	sp	+	4377	22	19.5239	18.9046	0.619347	Q12955-5	ANK3_HUMAN	Ankyrin-3 (ANK-3) (Ankyrin-G)	ANK3	ANK3
15.4201	14.6719	15.4908	14.8101	15.497	15.0672	sp	+	353	1929	15.4693	14.8497	0.619592	Q969Q1	TRI63_HUMAN	E3 ubiquitin-protein ligase TRIM63 (EC 2.3.2.27) (Iris RING finger protein) (Muscle-specific RING finger protein 1) (MuRF-1) (MuRF1) (RING finger protein 28) (RING-type E3 ubiquitin transferase TRIM63) (Striated muscle RING zinc finger protein) (Tripartite motif-containing protein 63)	TRIM63 IRF MURF1 RNF28 SMRZ	TRIM63
21.4037	20.8026	21.3959	20.7481	21.4004	20.7832	sp	+	419	409	21.4	20.7779	0.622028	P17540	KCRS_HUMAN	Creatine kinase S-type, mitochondrial (EC 2.7.3.2) (Basic-type mitochondrial creatine kinase) (Mib-CK) (Sarcomeric mitochondrial creatine kinase) (S-MtCK)	CKMT2	CKMT2
17.4853	16.5942	17.0487	16.5011	17.0648	16.6337	sp	+	225	873	17.1996	16.5763	0.62328	P21266	GSTM3_HUMAN	Glutathione S-transferase Mu 3 (EC 2.5.1.18) (GST class-mu 3) (GSTM3-3) (hGSTM3-3)	GSTM3 GST5	GSTM3
19.0093	18.3995	18.9556	18.3506	19.0006	18.3416	sp	+	842	109	18.9885	18.3639	0.624598	P11217	PYGM_HUMAN	Glycogen phosphorylase, muscle form (EC 2.4.1.1) (Myophosphorylase)	PYGM	PYGM
16.6671	16.186	16.9141	16.2195	16.7144	16.0126	sp	+	325	929	16.7652	16.1394	0.625818	P14550	AK1A1_HUMAN	Aldo-keto reductase family 1 member A1 (EC 1.1.1.2) (EC 1.1.1.372) (EC 1.1.1.54) (Alcohol dehydrogenase [NADP(+)]) (Aldehyde reductase) (Glucuronate reductase) (EC 1.1.1.19) (Glucuronolactone reductase) (EC 1.1.1.20)	AKR1A1 ALDR1 ALR	AKR1A1
13.9992	13.2955	13.9553	13.0186	13.6138	13.3741	sp	+	607	1450	13.8561	13.2294	0.626698	P52306	GDS1_HUMAN	Rap1 GTPase-GDP dissociation stimulator 1 (Exchange factor smgGDS) (SMG GDS protein) (SMG P21 stimulatory GDP/GTP exchange protein)	RAP1GDS1	RAP1GDS1
16.5315	16.3376	16.9992	16.1127	17.0289	16.2273	sp	+	192	1346	16.8532	16.2259	0.627316	Q9Y3B7	RM11_HUMAN	39S ribosomal protein L11, mitochondrial (L11mt) (MRP-L11) (Mitochondrial large ribosomal subunit protein uL11m)	MRPL11 CGI-113	MRPL11
16.3282	15.6959	16.3269	15.6651	16.1893	15.6014	sp	+	666	836	16.2815	15.6541	0.62739	Q13554	KCC2B_HUMAN	Calcium/calmodulin-dependent protein kinase type II subunit beta (CaM kinase II subunit beta) (CaMK-II subunit beta) (EC 2.7.11.17)	CAMK2B CAM2 CAMK2 CAMKB	CAMK2B
15.4528	14.7002	15.6806	14.7668	15.4095	15.1817	sp	+	795	1130	15.5143	14.8829	0.631405	Q9Y263	PLAP_HUMAN	Phospholipase A-2-activating protein (PLA2P) (PLAP)	PLAA PLAP	PLAA
20.8805	20.2698	20.863	20.1915	20.8553	20.237	sp	+	NaN	128	20.8662	20.2328	0.633476	Q96HC4-6	PDLI5_HUMAN
17.1407	16.6089	17.1606	16.1175	17.0626	16.6365	tr	+	468	1639	17.1213	16.4543	0.667013	A0A0D9SF30	A0A0D9SF30_HUMAN	Neural cell adhesion molecule 1 (Fragment)	NCAM1	NCAM1
19.1274	18.4003	19.0888	18.5169	19.1795	18.4765	sp	+	1375	186	19.1319	18.4646	0.667322	Q14112	NID2_HUMAN	Nidogen-2 (NID-2) (Osteonidogen)	NID2	NID2
16.4789	15.6969	16.4645	15.845	16.5132	15.9097	sp	+	351	1386	16.4855	15.8172	0.66835	Q8N335	GPD1L_HUMAN	Glycerol-3-phosphate dehydrogenase 1-like protein (GPD1-L) (EC 1.1.1.8)	GPD1L KIAA0089	GPD1L
17.3311	16.8844	17.68	16.8157	17.6902	16.9627	sp	+	1685	13	17.5671	16.8876	0.67948	P52179	MYOM1_HUMAN	Myomesin-1 (190 kDa connectin-associated protein) (190 kDa titin-associated protein) (Myomesin family member 1)	MYOM1	MYOM1
19.4207	18.7296	19.4605	18.8237	19.4318	18.6764	sp	+	1798	96	19.4377	18.7432	0.694469	P55268	LAMB2_HUMAN	Laminin subunit beta-2 (Laminin B1s chain) (Laminin-11 subunit beta) (Laminin-14 subunit beta) (Laminin-15 subunit beta) (Laminin-3 subunit beta) (Laminin-4 subunit beta) (Laminin-7 subunit beta) (Laminin-9 subunit beta) (S-laminin subunit beta) (S-LAM beta)	LAMB2 LAMS	LAMB2
17.7878	17.1359	17.845	17.1269	17.8333	17.1163	sp	+	220	2379	17.822	17.1264	0.695667	P56747	CLD6_HUMAN	Claudin-6 (Skullin)	CLDN6 UNQ757/PRO1488	CLDN6
16.3649	15.5487	16.5179	15.5905	16.33	15.9723	sp	+	478	2054	16.4043	15.7038	0.70042	Q9UQM7	KCC2A_HUMAN	Calcium/calmodulin-dependent protein kinase type II subunit alpha (CaM kinase II subunit alpha) (CaMK-II subunit alpha) (EC 2.7.11.17)	CAMK2A CAMKA KIAA0968	CAMK2A
17.7193	16.9317	17.7965	17.1096	17.6925	17.0578	sp	+	340	1572	17.7361	17.033	0.703032	Q15768	EFNB3_HUMAN	Ephrin-B3 (EPH-related receptor transmembrane ligand ELK-L3) (EPH-related receptor tyrosine kinase ligand 8) (LERK-8)	EFNB3 EPLG8 LERK8	EFNB3
17.4928	16.7175	17.4396	16.733	17.4436	16.8133	sp	+	532	1477	17.4587	16.7546	0.704067	P43007	SATT_HUMAN	Neutral amino acid transporter A (Alanine/serine/cysteine/threonine transporter 1) (ASCT-1) (SATT) (Solute carrier family 1 member 4)	SLC1A4 ASCT1 SATT	SLC1A4
20.2894	19.5739	20.2051	19.5807	20.2835	19.5024	sp	+	195	824	20.2594	19.5523	0.707045	P08590	MYL3_HUMAN	Myosin light chain 3 (Cardiac myosin light chain 1) (CMLC1) (Myosin light chain 1, slow-twitch muscle B/ventricular isoform) (MLC1SB) (Ventricular myosin alkali light chain) (Ventricular myosin light chain 1) (VLCl) (Ventricular/slow twitch myosin alkali light chain) (MLC-lV/sb)	MYL3	MYL3
14.3541	13.9991	15.0336	13.9339	14.6054	13.9388	sp	+	114	2421	14.6644	13.9572	0.707123	O14548	COX7R_HUMAN	Cytochrome c oxidase subunit 7A-related protein, mitochondrial (COX7a-related protein) (Cytochrome c oxidase subunit VIIa-related protein) (EB1)	COX7A2L COX7AR COX7RP	COX7A2L
15.3129	14.7781	15.2052	14.4877	15.285	14.4152	sp	+	382	1847	15.2677	14.5604	0.707375	P17302	CXA1_HUMAN	Gap junction alpha-1 protein (Connexin-43) (Cx43) (Gap junction 43 kDa heart protein)	GJA1 GJAL	GJA1
13.6769	13.2456	14.1763	13.414	14.2096	13.2731	tr	+	144	1266	14.021	13.3109	0.710055	F8W7Q4	F8W7Q4_HUMAN	Protein FAM162A	FAM162A	FAM162A
18.1698	17.6787	18.3842	17.5005	18.1812	17.4008	sp	+	504	778	18.245	17.5267	0.718353	Q9HCP6	HHATL_HUMAN	Protein-cysteine N-palmitoyltransferase HHAT-like protein (Glycerol uptake/transporter homolog) (Hedgehog acyltransferase-like protein)	HHATL C3orf3 GUP1 KIAA1173	HHATL
15.0811	14.1277	14.9121	14.0191	14.6302	14.2927	tr	+	803	1512	14.8744	14.1465	0.727942	F8W717	F8W717_HUMAN	Echinoderm microtubule-associated protein-like 1	EML1	EML1
17.9666	17.1604	17.9447	17.2316	17.9021	17.2091	sp	+	364	808	17.9378	17.2003	0.737463	Q5BKX8	CAVN4_HUMAN	Caveolae-associated protein 4 (Muscle-related coiled-coil protein) (Muscle-restricted coiled-coil protein)	CAVIN4 MURC	CAVIN4
17.4149	16.8284	17.4628	16.5987	17.4584	16.665	sp	+	335	1917	17.4454	16.6974	0.748024	O76003	GLRX3_HUMAN	Glutaredoxin-3 (PKC-interacting cousin of thioredoxin) (PICOT) (PKC-theta-interacting protein) (PKCq-interacting protein) (Thioredoxin-like protein 2)	GLRX3 PICOT TXNL2 HUSSY-22	GLRX3
16.5389	15.8261	16.6352	15.9363	16.5814	15.7444	sp	+	224	2242	16.5852	15.8356	0.749588	Q9UM22	EPDR1_HUMAN	Mammalian ependymin-related protein 1 (MERP-1) (Upregulated in colorectal cancer gene 1 protein)	EPDR1 MERP1 UCC1	EPDR1
18.5074	17.8523	18.5721	17.8277	18.5619	17.6114	sp	+	619	256	18.5471	17.7638	0.783295	Q9Y2P4	S27A6_HUMAN	Long-chain fatty acid transport protein 6 (FATP-6) (Fatty acid transport protein 6) (Fatty-acid-coenzyme A ligase, very long-chain 2) (Solute carrier family 27 member 6) (Very long-chain acyl-CoA synthetase homolog 1) (VLCSH1) (hVLCS-H1)	SLC27A6 ACSVL2 FACVL2 FATP1	SLC27A6
15.968	15.2149	16.1458	15.2544	16.1291	15.4151	sp	+	180	2418	16.081	15.2948	0.786188	Q9NZJ9	NUDT4_HUMAN	Diphosphoinositol polyphosphate phosphohydrolase 2 (DIPP-2) (EC 3.6.1.52) (Diadenosine 5',5'''-P1,P6-hexaphosphate hydrolase 2) (Nucleoside diphosphate-linked moiety X motif 4) (Nudix motif 4)	NUDT4 DIPP2 KIAA0487 HDCMB47P	NUDT4
15.5543	14.9264	15.4771	14.5622	15.7557	14.9191	sp	+	758	2491	15.5957	14.8026	0.793128	Q16891-3	MIC60_HUMAN	MICOS complex subunit MIC60 (Cell proliferation-inducing gene 4/52 protein) (Mitochondrial inner membrane protein) (Mitofilin) (p87/89)	IMMT HMP MIC60 MINOS2 PIG4 PIG52	IMMT
18.2283	17.2027	18.3142	17.5881	18.2613	17.5792	sp	+	181	2594	18.2679	17.4567	0.811268	Q9BQJ4	TMM47_HUMAN	Transmembrane protein 47 (Brain cell membrane protein 1) (Transmembrane 4 superfamily member 10)	TMEM47 BCMP1 TM4SF10	TMEM47
18.3917	17.969	18.6211	17.8712	18.6695	17.4027	sp	+	504	1166	18.5608	17.7476	0.813154	P78324	SHPS1_HUMAN	Tyrosine-protein phosphatase non-receptor type substrate 1 (SHP substrate 1) (SHPS-1) (Brain Ig-like molecule with tyrosine-based activation motifs) (Bit) (CD172 antigen-like family member A) (Inhibitory receptor SHPS-1) (Macrophage fusion receptor) (MyD-1 antigen) (Signal-regulatory protein alpha-1) (Sirp-alpha-1) (Signal-regulatory protein alpha-2) (Sirp-alpha-2) (Signal-regulatory protein alph…	SIRPA BIT MFR MYD1 PTPNS1 SHPS1 SIRP	SIRPA
14.1538	13.7448	14.2813	13.4635	14.3517	13.0837	sp	+	1127	1960	14.2623	13.4307	0.83159	Q9UPR0	PLCL2_HUMAN	Inactive phospholipase C-like protein 2 (PLC-L(2)) (PLC-L2) (Phospholipase C-L2) (Phospholipase C-epsilon-2) (PLC-epsilon-2)	PLCL2 KIAA1092 PLCE2	PLCL2
15.3092	14.2835	15.6082	14.3625	14.7859	14.5556	sp	+	448	2321	15.2345	14.4005	0.833933	P68366	TBA4A_HUMAN	Tubulin alpha-4A chain (Alpha-tubulin 1) (Testis-specific alpha-tubulin) (Tubulin H2-alpha) (Tubulin alpha-1 chain)	TUBA4A TUBA1	TUBA4A
19.3027	18.5116	19.3207	18.2792	19.3185	18.56	sp	+	434	602	19.314	18.4503	0.863724	P13929	ENOB_HUMAN	Beta-enolase (EC 4.2.1.11) (2-phospho-D-glycerate hydro-lyase) (Enolase 3) (Muscle-specific enolase) (MSE) (Skeletal muscle enolase)	ENO3	ENO3
14.894	13.8554	14.1242	13.685	14.9875	13.8476	sp	+	341	2097	14.6686	13.796	0.872529	O95400	CD2B2_HUMAN	CD2 antigen cytoplasmic tail-binding protein 2 (CD2 cytoplasmic domain-binding protein 2) (CD2 tail-binding protein 2) (U5 snRNP 52K protein) (U5-52K)	CD2BP2 KIAA1178	CD2BP2
16.3153	15.6896	16.4214	15.4612	16.4224	15.3341	sp	+	358	1122	16.3863	15.495	0.89137	Q9BYV2	TRI54_HUMAN	Tripartite motif-containing protein 54 (Muscle-specific RING finger protein) (MuRF) (Muscle-specific RING finger protein 3) (MuRF-3) (MuRF3) (RING finger protein 30)	TRIM54 MURF MURF3 RNF30	TRIM54
17.6684	16.4187	17.6525	16.8559	17.7077	17.0341	sp	+	268	1013	17.6762	16.7696	0.906618	Q15691	MARE1_HUMAN	Microtubule-associated protein RP/EB family member 1 (APC-binding protein EB1) (End-binding protein 1) (EB1)	MAPRE1	MAPRE1
18.5729	17.521	18.6919	17.7602	18.5606	17.7717	sp	+	490	473	18.6085	17.6843	0.924181	Q8NB12	SMYD1_HUMAN	Histone-lysine N-methyltransferase SMYD1 (EC 2.1.1.43) (SET and MYND domain-containing protein 1)	SMYD1	SMYD1
16.9244	15.8789	16.8836	16.1827	16.8835	15.7874	sp	+	1069	2040	16.8971	15.9497	0.947433	O60245-2	PCDH7_HUMAN	Protocadherin-7 (Brain-heart protocadherin) (BH-Pcdh)	PCDH7 BHPCDH	PCDH7
21.0847	19.9009	21.1019	20.243	21.0613	20.2455	sp	+	687	151	21.0826	20.1298	0.952805	P21980	TGM2_HUMAN	Protein-glutamine gamma-glutamyltransferase 2 (EC 2.3.2.13) (Tissue transglutaminase) (Transglutaminase C) (TG(C)) (TGC) (TGase C) (Transglutaminase H) (TGase H) (Transglutaminase-2) (TGase-2)	TGM2	TGM2
15.3738	14.3174	15.3846	14.5156	15.3678	14.3879	sp	+	243	2260	15.3754	14.407	0.968416	P61328	FGF12_HUMAN	Fibroblast growth factor 12 (FGF-12) (Fibroblast growth factor homologous factor 1) (FHF-1) (Myocyte-activating factor)	FGF12 FGF12B FHF1	FGF12
17.8433	16.7993	17.7569	16.7914	17.8602	16.9326	sp	+	191	1208	17.8202	16.8411	0.979057	P84095	RHOG_HUMAN	Rho-related GTP-binding protein RhoG	RHOG ARHG	RHOG
18.3989	17.434	18.3535	17.4008	18.3511	17.267	sp	+	160	1063	18.3678	17.3673	1.00054	O14558	HSPB6_HUMAN	Heat shock protein beta-6 (HspB6) (Heat shock 20 kDa-like protein p20)	HSPB6	HSPB6
20.4985	19.3687	20.5206	19.4124	20.2987	19.5263	sp	+	175	637	20.4393	19.4358	1.00343	Q01449	MLRA_HUMAN	Myosin regulatory light chain 2, atrial isoform (MLC-2a) (MLC2a) (Myosin light chain 2a) (Myosin regulatory light chain 7)	MYL7 MYL2A MYLC2A	MYL7
17.2055	16.5191	17.2395	16.101	17.2937	16.086	sp	+	464	1259	17.2463	16.2354	1.01085	P78539	SRPX_HUMAN	Sushi repeat-containing protein SRPX	SRPX ETX1	SRPX
17.9592	16.8988	17.9591	17.0877	18.0054	16.9039	sp	+	325	1226	17.9746	16.9635	1.01109	Q96CX2	KCD12_HUMAN	BTB/POZ domain-containing protein KCTD12 (Pfetin) (Predominantly fetal expressed T1 domain)	KCTD12 C13orf2 KIAA1778 PFET1	KCTD12
16.3425	15.3615	16.4673	15.4787	16.5631	15.4946	sp	+	819	538	16.4576	15.4449	1.01266	Q32MK0	MYLK3_HUMAN	Myosin light chain kinase 3 (EC 2.7.11.18) (Cardiac-MyBP-C-associated Ca/CaM kinase) (Cardiac-MLCK)	MYLK3 MLCK	MYLK3
19.1471	18.0637	19.139	18.1081	19.1586	18.061	sp	+	316	506	19.1483	18.0776	1.07068	P15121	ALDR_HUMAN	Aldo-keto reductase family 1 member B1 (EC 1.1.1.300) (EC 1.1.1.372) (EC 1.1.1.54) (Aldehyde reductase) (Aldose reductase) (AR) (EC 1.1.1.21)	AKR1B1 ALDR1 ALR2	AKR1B1
15.3618	14.1592	15.4146	13.918	15.5364	15.0117	sp	+	239	1521	15.4376	14.363	1.07461	P55822	SH3BG_HUMAN	SH3 domain-binding glutamic acid-rich protein (SH3BGR protein) (21-glutamic acid-rich protein) (21-GARP)	SH3BGR	SH3BGR
14.2027	13.1595	14.3551	12.6755	14.3303	13.8203	tr	+	187	2340	14.296	13.2184	1.07762	C9JBI3	C9JBI3_HUMAN	Phosphoserine phosphatase (Fragment)	PSPH	PSPH
17.2377	16.7642	17.3011	15.5893	17.2161	16.1583	sp	+	443	1183	17.2516	16.1706	1.08103	P61201	CSN2_HUMAN	COP9 signalosome complex subunit 2 (SGN2) (Signalosome subunit 2) (Alien homolog) (JAB1-containing signalosome subunit 2) (Thyroid receptor-interacting protein 15) (TR-interacting protein 15) (TRIP-15)	COPS2 CSN2 TRIP15	COPS2
15.4657	14.347	15.3132	13.9202	15.6391	14.6706	sp	+	976	1352	15.4727	14.3126	1.16008	P29317	EPHA2_HUMAN	Ephrin type-A receptor 2 (EC 2.7.10.1) (Epithelial cell kinase) (Tyrosine-protein kinase receptor ECK)	EPHA2 ECK	EPHA2
15.0649	14.1314	15.4404	13.6388	14.9286	14.1339	sp	+	447	2698	15.1446	13.968	1.17661	Q10469	MGAT2_HUMAN	Alpha-1,6-mannosyl-glycoprotein 2-beta-N-acetylglucosaminyltransferase (EC 2.4.1.143) (Beta-1,2-N-acetylglucosaminyltransferase II) (GlcNAc-T II) (GNT-II) (Mannoside acetylglucosaminyltransferase 2) (N-glycosyl-oligosaccharide-glycoprotein N-acetylglucosaminyltransferase II)	MGAT2	MGAT2
16.2464	15.7164	16.0691	14.8141	16.2999	14.3137	sp	+	321	1463	16.2051	14.9481	1.25708	Q63HM9	PLCX3_HUMAN	PI-PLC X domain-containing protein 3	PLCXD3	PLCXD3
14.1109	13.1827	14.2135	12.8468	14.1056	12.5885	tr	+	141	2600	14.1433	12.8727	1.27063	F8WD64	F8WD64_HUMAN	Protein stum homolog	STUM	STUM
16.2597	14.44	16.1438	14.8947	16.3566	15.4382	sp	+	360	1940	16.2534	14.9243	1.32907	Q16539	MK14_HUMAN	Mitogen-activated protein kinase 14 (MAP kinase 14) (MAPK 14) (EC 2.7.11.24) (Cytokine suppressive anti-inflammatory drug-binding protein) (CSAID-binding protein) (CSBP) (MAP kinase MXI2) (MAX-interacting protein 2) (Mitogen-activated protein kinase p38 alpha) (MAP kinase p38 alpha) (Stress-activated protein kinase 2a) (SAPK2a)	MAPK14 CSBP CSBP1 CSBP2 CSPB1 MXI2 SAPK2A	MAPK14
12.6805	11.6509	12.8805	11.8684	13.3386	11.2837	tr	+	94	2684	12.9665	11.601	1.36556	A6PVM9	A6PVM9_HUMAN	Allograft inflammatory factor 1-like	AIF1L	AIF1L
15.0776	13.4389	15.2776	13.8341	15.4534	13.9572	sp	+	370	2478	15.2695	13.7434	1.52613	Q9GZP0	PDGFD_HUMAN	Platelet-derived growth factor D (PDGF-D) (Iris-expressed growth factor) (Spinal cord-derived growth factor B) (SCDGF-B) [Cleaved into: Platelet-derived growth factor D, latent form (PDGFD latent form);Platelet-derived growth factor D, receptor-binding form (PDGFD receptor-binding form)]	PDGFD IEGF SCDGFB MSTP036 UNQ1899/PRO4345	PDGFD
18.2417	16.825	18.185	16.593	18.217	16.5445	tr	+	156	1966	18.2146	16.6542	1.56041	E9PLM6	E9PLM6_HUMAN	Midkine	MDK	MDK
17.4129	15.6609	17.3895	15.8436	17.47	15.9977	tr	+	3062	66	17.4241	15.834	1.59006	D6RGG3	D6RGG3_HUMAN	Collagen alpha-1(XII) chain	COL12A1	COL12A1
14.5763	13.5338	14.3298	12.2461	14.9471	13.141	tr	+	1831	146	14.6177	12.9736	1.64412	J3KN01	J3KN01_HUMAN	Afadin	AFDN	AFDN
10.7076	9.46653	10.1397	8.44311	10.1184	7.90527	tr	+	1099	2643	10.3219	8.60497	1.71694	A0A1C7CYX1	A0A1C7CYX1_HUMAN	ELM2 and SANT domain-containing protein 1	ELMSAN1	ELMSAN1
14.3912	12.8863	14.5478	12.8945	14.2803	12.2168	sp	+	829	2384	14.4064	12.6659	1.74058	P22223	CADH3_HUMAN	Cadherin-3 (Placental cadherin) (P-cadherin)	CDH3 CDHP	CDH3
13.5793	11.7214	13.6246	12.0354	13.682	11.4646	tr	+	1230	1375	13.6286	11.7404	1.88818	J3KR97	J3KR97_HUMAN	Tubulin-specific chaperone D	TBCD	TBCD
14.0642	11.8266	12.9671	12.5854	14.2564	10.7783	sp	+	272	1570	13.7626	11.7301	2.03248	O43741	AAKB2_HUMAN	5'-AMP-activated protein kinase subunit beta-2 (AMPK subunit beta-2)	PRKAB2	PRKAB2
11.57	9.53111	10.5876	9.12572	10.6587	7.50859	sp	+	1025	1409	10.9387	8.72181	2.21694	Q9H0A0	NAT10_HUMAN	RNA cytidine acetyltransferase (EC 2.3.1.-) (18S rRNA cytosine acetyltransferase) (N-acetyltransferase 10) (N-acetyltransferase-like protein) (hALP)	NAT10 ALP KIAA1709	NAT10
14.8534	12.193	15.0557	11.9903	14.3057	12.8276	sp	+	159	2195	14.7383	12.337	2.4013	O14521	DHSD_HUMAN	Succinate dehydrogenase [ubiquinone] cytochrome b small subunit, mitochondrial (CybS) (CII-4) (QPs3) (Succinate dehydrogenase complex subunit D) (Succinate-ubiquinone oxidoreductase cytochrome b small subunit) (Succinate-ubiquinone reductase membrane anchor subunit)	SDHD SDH4	SDHD
15.7578	12.9976	15.7109	13.0833	15.8026	13.7678	sp	+	368	1398	15.7571	13.2829	2.47421	Q9Y2S7	PDIP2_HUMAN	Polymerase delta-interacting protein 2 (38 kDa DNA polymerase delta interaction protein) (p38)	POLDIP2 PDIP38 POLD4 HSPC017	POLDIP2
14.2909	10.0853	14.5042	12.6272	14.2701	10.6136	sp	+	609	2426	14.3551	11.1087	3.24636	P02768	ALBU_HUMAN	Serum albumin	ALB GIG20 GIG42 PRO0903 PRO1708 PRO2044 PRO2619 PRO2675 UNQ696/PRO1341	ALB
14.9642	12.8587	16.6369	12.9269	16.6237	12.5136	tr	+	98	2620	16.075	12.7664	3.30855	E9PR30	E9PR30_HUMAN	40S ribosomal protein S30	FAU	FAU
15.1659	14.1128	17.3275	10.7635	15.0843	12.0714	tr	+	271	1619	15.8593	12.3159	3.54332	A0A0A0MSW4	A0A0A0MSW4_HUMAN	Phosphatidylinositol transfer protein beta isoform	PITPNB	PITPNB
11.5034	9.71932	8.93681	14.8923	9.59227	14.8369	sp		642	2524	10.0108	13.1495	-3.13867	Q9BTE3	MCMBP_HUMAN	Mini-chromosome maintenance complex-binding protein (MCM-BP) (MCM-binding protein)	MCMBP C10orf119	MCMBP
8.66945	17.7106	17.5238	17.7093	17.5594	17.6038	sp		1386	2610	14.5842	17.6745	-3.0903	Q6P158	DHX57_HUMAN	Putative ATP-dependent RNA helicase DHX57 (EC 3.6.4.13) (DEAH box protein 57)	DHX57	DHX57
11.9661	12.0682	10.7891	10.1222	7.59335	15.8771	sp		128	2425	10.1162	12.6892	-2.57298	Q7Z7F7	RM55_HUMAN	39S ribosomal protein L55, mitochondrial (L55mt) (MRP-L55) (Mitochondrial large ribosomal subunit protein bL31m) (Mitochondrial large ribosomal subunit protein mL55)	MRPL55 UNQ5835/PRO19675	MRPL55
10.4777	13.9515	10.4933	13.9429	13.5617	13.9159	sp		193	1768	11.5109	13.9367	-2.42586	P21291	CSRP1_HUMAN	Cysteine and glycine-rich protein 1 (Cysteine-rich protein 1) (CRP) (CRP1) (Epididymis luminal protein 141) (HEL-141)	CSRP1 CSRP CYRP	CSRP1
15.8886	15.8447	12.7081	15.8879	11.8329	15.8253	sp		401	1370	13.4765	15.8526	-2.37612	O75718	CRTAP_HUMAN	Cartilage-associated protein	CRTAP CASP	CRTAP
13.4239	13.9762	13.3939	14.0555	8.3668	14.0633	tr		1364	2439	11.7282	14.0317	-2.30347	A0A087WTA8	A0A087WTA8_HUMAN	Collagen alpha-2(I) chain	COL1A2	COL1A2
11.481	11.7397	7.36264	12.1424	8.67076	9.82895	tr		1249	1158	9.17147	11.237	-2.06553	A0A1B0GTW1	A0A1B0GTW1_HUMAN	Tight junction protein ZO-2	TJP2	TJP2
13.8062	11.9958	10.4154	14.1682	10.1982	14.127	sp		962	1621	11.4733	13.4303	-1.95708	O43592	XPOT_HUMAN	Exportin-T (Exportin(tRNA)) (tRNA exportin)	XPOT	XPOT
13.2747	14.085	13.2526	13.8604	9.46275	13.9148	sp		375	1834	11.9967	13.9534	-1.95675	A8MXV4	NUD19_HUMAN	Nucleoside diphosphate-linked moiety X motif 19 (Nudix motif 19) (EC 3.6.1.-)	NUDT19	NUDT19
12.2419	17.3722	14.1655	15.019	16.0757	15.894	sp		338	1303	14.1611	16.0951	-1.93401	Q9NYK5	RM39_HUMAN	39S ribosomal protein L39, mitochondrial (L39mt) (MRP-L39) (39S ribosomal protein L5, mitochondrial) (L5mt) (MRP-L5) (Mitochondrial large ribosomal subunit protein mL39)	MRPL39 C21orf92 MRPL5 RPML5 MSTP003 PRED22	MRPL39
13.3826	13.8272	13.1242	13.8797	9.1025	13.5513	sp		469	2391	11.8698	13.7528	-1.88298	Q5R3I4	TTC38_HUMAN	Tetratricopeptide repeat protein 38 (TPR repeat protein 38)	TTC38	TTC38
12.4829	14.372	14.0703	14.4438	11.1108	14.4346	tr		202	2433	12.5547	14.4168	-1.86214	G3V5T0	G3V5T0_HUMAN	Maleylacetoacetate isomerase	GSTZ1	GSTZ1
10.9754	14.1547	11.0277	14.0888	14.9822	14.2347	tr		489	2285	12.3284	14.1594	-1.83095	H0YMG7	H0YMG7_HUMAN	Retinal dehydrogenase 2	ALDH1A2	ALDH1A2
10.3254	15.2506	15.0858	15.4023	15.1034	15.1451	sp		897	2175	13.5049	15.266	-1.7611	O14787-2	TNPO2_HUMAN	Transportin-2 (Karyopherin beta-2b)	TNPO2	TNPO2
11.4283	11.3086	7.86592	11.3794	10.5675	12.3412	sp		1576	1342	9.95389	11.6764	-1.72254	Q9P265	DIP2B_HUMAN	Disco-interacting protein 2 homolog B (DIP2 homolog B)	DIP2B KIAA1463	DIP2B
10.7967	13.9576	11.6177	13.5398	13.7409	13.7999	sp		434	2148	12.0518	13.7657	-1.71396	Q96Q11	TRNT1_HUMAN	CCA tRNA nucleotidyltransferase 1, mitochondrial (EC 2.7.7.72) (Mitochondrial tRNA nucleotidyl transferase, CCA-adding) (mt CCA-adding enzyme) (mt tRNA CCA-diphosphorylase) (mt tRNA CCA-pyrophosphorylase) (mt tRNA adenylyltransferase)	TRNT1 CGI-47	TRNT1
14.0088	15.0376	14.178	14.9069	11.8269	15.0678	sp		437	2107	13.3379	15.0041	-1.66624	Q92791	SC65_HUMAN	Endoplasmic reticulum protein SC65 (Leprecan-like protein 4) (Nucleolar autoantigen No55) (Prolyl 3-hydroxylase family member 4) (Synaptonemal complex protein SC65)	P3H4 LEPREL4 NOL55 SC65	P3H4
10.1859	13.5651	12.2759	12.6134	12.3457	13.5976	sp		1093	2455	11.6025	13.2587	-1.65622	Q9UMS6-4	SYNP2_HUMAN	Synaptopodin-2 (Genethonin-2) (Myopodin)	SYNPO2	SYNPO2
9.53821	13.6892	13.5582	14.0125	13.6645	13.9952	sp		261	2217	12.2536	13.899	-1.64539	P35270	SPRE_HUMAN	Sepiapterin reductase (SPR) (EC 1.1.1.153)	SPR	SPR
13.9335	15.3629	14.289	14.3344	11.9517	15.3435	sp		768	1188	13.3914	15.0136	-1.62219	Q13618-2	CUL3_HUMAN	Cullin-3 (CUL-3)	CUL3 KIAA0617	CUL3
11.4611	12.6454	8.76617	12.5473	13.0286	12.9265	tr		301	2120	11.0853	12.7064	-1.62114	A0A1W2PPZ5	A0A1W2PPZ5_HUMAN	Transcription elongation factor A protein 1	TCEA1	TCEA1
19.5686	19.508	19.5732	19.6087	14.2124	19.0931	sp		711	1326	17.7847	19.4033	-1.61855	O60488	ACSL4_HUMAN	Long-chain-fatty-acid--CoA ligase 4 (EC 6.2.1.3) (Arachidonate--CoA ligase) (EC 6.2.1.15) (Long-chain acyl-CoA synthetase 4) (LACS 4)	ACSL4 ACS4 FACL4 LACS4	ACSL4
14.1746	14.4678	11.2781	14.4101	10.5982	12.0109	sp		797	1529	12.017	13.6296	-1.61259	Q13033-2	STRN3_HUMAN	Striatin-3 (Cell cycle autoantigen SG2NA) (S/G2 antigen)	STRN3 GS2NA SG2NA	STRN3
14.1228	14.8938	12.0685	15.1375	14.1545	15.0973	tr		215	2280	13.4486	15.0429	-1.59429	C9JJ54	C9JJ54_HUMAN	WD repeat and FYVE domain-containing protein 1 (Fragment)	WDFY1	WDFY1
16.7276	16.9951	16.6065	16.8094	12.421	16.6416	sp		975	2447	15.2517	16.8154	-1.56364	Q5VTR2	BRE1A_HUMAN	E3 ubiquitin-protein ligase BRE1A (BRE1-A) (hBRE1) (EC 2.3.2.27) (RING finger protein 20) (RING-type E3 ubiquitin transferase BRE1A)	RNF20 BRE1A	RNF20
13.8448	14.2249	13.0796	15.7747	14.4512	16.0364	sp		662	1160	13.7919	15.3453	-1.55344	P20591	MX1_HUMAN	Interferon-induced GTP-binding protein Mx1 (Interferon-induced protein p78) (IFI-78K) (Interferon-regulated resistance GTP-binding protein MxA) (Myxoma resistance protein 1) (Myxovirus resistance protein 1) [Cleaved into: Interferon-induced GTP-binding protein Mx1, N-terminally processed]	MX1	MX1
10.2465	13.6514	12.8643	13.0572	11.8795	12.8692	sp		524	2576	11.6634	13.1926	-1.52918	Q13362	2A5G_HUMAN	Serine/threonine-protein phosphatase 2A 56 kDa regulatory subunit gamma isoform (PP2A B subunit isoform B'-gamma) (PP2A B subunit isoform B56-gamma) (PP2A B subunit isoform PR61-gamma) (PP2A B subunit isoform R5-gamma) (Renal carcinoma antigen NY-REN-29)	PPP2R5C KIAA0044	PPP2R5C
13.4473	14.2487	13.4202	14.1003	11.1635	14.1116	sp		371	2155	12.677	14.1535	-1.47653	Q68CQ7	GL8D1_HUMAN	Glycosyltransferase 8 domain-containing protein 1 (EC 2.4.1.-)	GLT8D1 GALA4A AD-017 MSTP137 UNQ572/PRO1134	GLT8D1
14.9358	15.4032	11.9205	15.4786	15.3316	15.6035	tr		187	1765	14.0627	15.4951	-1.43244	H0Y7A7	H0Y7A7_HUMAN	Calmodulin-2	CALM2	CALM2
14.6439	15.3592	14.5106	15.3008	12.5134	15.2879	tr		206	2386	13.8893	15.316	-1.42667	H0YD13	H0YD13_HUMAN	CD44 antigen	CD44	CD44
14.1773	14.4165	11.1052	14.7025	13.9873	14.4059	tr		552	2297	13.09	14.5083	-1.41835	H0Y4R5	H0Y4R5_HUMAN	Transmembrane protein 201 (Fragment)	TMEM201	TMEM201
14.4826	17.7481	16.9875	17.6662	17.6103	17.8683	sp		1094	1654	16.3601	17.7609	-1.40077	O00203	AP3B1_HUMAN	AP-3 complex subunit beta-1 (Adaptor protein complex AP-3 subunit beta-1) (Adaptor-related protein complex 3 subunit beta-1) (Beta-3A-adaptin) (Clathrin assembly protein complex 3 beta-1 large chain)	AP3B1 ADTB3A	AP3B1
16.0754	16.9192	16.6636	17.1821	14.3385	17.1663	sp		1657	277	15.6925	17.0892	-1.39674	P46940	IQGA1_HUMAN	Ras GTPase-activating-like protein IQGAP1 (p195)	IQGAP1 KIAA0051	IQGAP1
15.6341	15.5972	11.3118	15.4735	15.526	15.5904	sp		116	2541	14.1573	15.5537	-1.39643	Q96DA6	TIM14_HUMAN	Mitochondrial import inner membrane translocase subunit TIM14 (DnaJ homolog subfamily C member 19)	DNAJC19 TIM14 TIMM14	DNAJC19
13.7608	18.0957	14.4085	12.7885	13.4798	14.8922	sp		277	2580	13.883	15.2588	-1.37573	P42574	CASP3_HUMAN	Caspase-3 (CASP-3) (EC 3.4.22.56) (Apopain) (Cysteine protease CPP32) (CPP-32) (Protein Yama) (SREBP cleavage activity 1) (SCA-1) [Cleaved into: Caspase-3 subunit p17;Caspase-3 subunit p12]	CASP3 CPP32	CASP3
14.3371	14.5767	12.9386	14.6768	12.5437	14.5986	tr		371	742	13.2732	14.6174	-1.3442	Q5SRN5	Q5SRN5_HUMAN	HLA class I histocompatibility antigen, A-3 alpha chain	HLA-A	HLA-A
14.4716	14.7459	14.1343	14.6862	11.6552	14.8193	tr		366	888	13.4204	14.7504	-1.33007	B3KS98	B3KS98_HUMAN	Eukaryotic translation initiation factor 3 subunit H (eIF3h) (Eukaryotic translation initiation factor 3 subunit 3) (eIF-3 gamma) (eIF3 p40 subunit)	EIF3H EIF3S3 hCG_20900	EIF3H
13.475	14.8384	11.5475	13.6614	13.3867	13.8897	sp		237	2102	12.803	14.1298	-1.3268	Q9ULC3	RAB23_HUMAN	Ras-related protein Rab-23	RAB23 HSPC137	RAB23
11.9026	14.5401	14.1054	14.2007	13.4094	14.5723	tr		244	2454	13.1391	14.4377	-1.29857	H0YI09	H0YI09_HUMAN	Methyltransferase-like protein 7A (Fragment)	METTL7A	METTL7A
13.3981	14.0285	10.9741	14.2524	14.3509	14.2922	tr		304	2290	12.9077	14.191	-1.28335	Q5SZE1	Q5SZE1_HUMAN	Ceramide synthase 2 (Fragment)	CERS2	CERS2
13.2296	15.8192	12.8946	14.3098	16.0951	15.9261	sp		492	2706	14.0731	15.3517	-1.27861	Q8WUA2	PPIL4_HUMAN	Peptidyl-prolyl cis-trans isomerase-like 4 (PPIase) (EC 5.2.1.8) (Cyclophilin-like protein PPIL4) (Rotamase PPIL4)	PPIL4	PPIL4
13.6331	14.3878	11.8071	14.2398	13.8836	14.4666	sp		911	334	13.1079	14.3647	-1.25677	O43707	ACTN4_HUMAN	Alpha-actinin-4 (Non-muscle alpha-actinin 4)	ACTN4	ACTN4
12.0117	14.7072	12.9512	13.6185	12.3928	12.7994	sp		442	1734	12.4519	13.7084	-1.25648	Q4G0N4	NAKD2_HUMAN	NAD kinase 2, mitochondrial (EC 2.7.1.23) (Mitochondrial NAD kinase) (NAD kinase domain-containing protein 1, mitochondrial)	NADK2 C5orf33 MNADK NADKD1	NADK2
14.5868	15.334	14.625	15.333	12.9128	15.1149	sp		1035	1858	14.0415	15.2606	-1.2191	Q13797	ITA9_HUMAN	Integrin alpha-9 (Integrin alpha-RLC)	ITGA9	ITGA9
14.8877	15.159	13.8521	15.1632	13.1563	15.1989	tr		861	1947	13.9654	15.1737	-1.20832	H0Y360	H0Y360_HUMAN	AMP deaminase 2	AMPD2	AMPD2
13.4014	13.8148	11.1003	13.8634	13.6254	14.0606	sp		812	2367	12.709	13.9129	-1.2039	P46087-2	NOP2_HUMAN	Probable 28S rRNA (cytosine(4447)-C(5))-methyltransferase (EC 2.1.1.-) (Nucleolar protein 1) (Nucleolar protein 2 homolog) (Proliferating-cell nucleolar antigen p120) (Proliferation-associated nucleolar protein p120)	NOP2 NOL1 NSUN1	NOP2
18.8254	18.8553	18.3721	18.7328	15.6162	18.817	sp		519	856	17.6046	18.8017	-1.19712	O60749	SNX2_HUMAN	Sorting nexin-2 (Transformation-related gene 9 protein) (TRG-9)	SNX2 TRG9	SNX2
13.2582	13.5073	11.9144	13.5043	13.2698	15.008	sp		1212	2201	12.8141	14.0066	-1.19242	P55011	S12A2_HUMAN	Solute carrier family 12 member 2 (Basolateral Na-K-Cl symporter) (Bumetanide-sensitive sodium-(potassium)-chloride cotransporter 2)	SLC12A2 NKCC1	SLC12A2
19.4465	20.2414	18.1597	20.2077	19.5086	20.1888	tr		395	432	19.0383	20.2126	-1.17436	A0A0A0MSG2	A0A0A0MSG2_HUMAN	Four and a half LIM domains protein 2	FHL2	FHL2
13.2864	13.2059	8.93787	13.2682	13.5745	12.8165	sp		372	1728	11.9329	13.0969	-1.16394	P50750-2	CDK9_HUMAN	Cyclin-dependent kinase 9 (EC 2.7.11.22) (EC 2.7.11.23) (C-2K) (Cell division cycle 2-like protein kinase 4) (Cell division protein kinase 9) (Serine/threonine-protein kinase PITALRE) (Tat-associated kinase complex catalytic subunit)	CDK9 CDC2L4 TAK	CDK9
10.4169	11.4862	8.89394	11.8445	10.6315	10.0646	sp		437	2589	9.98079	11.1318	-1.15096	O43493	TGON2_HUMAN	Trans-Golgi network integral membrane protein 2 (Trans-Golgi network glycoprotein 46) (TGN38 homolog) (hTGN46) (Trans-Golgi network glycoprotein 48) (hTGN48) (Trans-Golgi network glycoprotein 51) (hTGN51) (Trans-Golgi network protein 2)	TGOLN2 TGN46 TGN51	TGOLN2
16.9022	16.7821	13.7233	17.0027	14.368	14.6568	tr		516	2552	14.9978	16.1472	-1.14938	Q5SWX3	Q5SWX3_HUMAN	Calcium/calmodulin-dependent protein kinase (CaM kinase) II gamma, isoform CRA_n (Calcium/calmodulin-dependent protein kinase type II subunit gamma)	CAMK2G hCG_20541	CAMK2G
13.4286	13.6096	11.1752	12.8188	11.9712	13.5838	tr		721	1730	12.1917	13.3374	-1.14573	B1AHL2	B1AHL2_HUMAN	Fibulin-1	FBLN1	FBLN1
10.0748	13.1402	13.626	10.1573	9.52671	13.3574	sp		782	2137	11.0759	12.2183	-1.14247	Q9UID3	VPS51_HUMAN	Vacuolar protein sorting-associated protein 51 homolog (Another new gene 2 protein) (Protein fat-free homolog)	VPS51 ANG2 C11orf2 C11orf3 FFR PP5382	VPS51
16.2446	16.1916	13.2506	16.1403	15.4092	15.9813	sp		377	1856	14.9681	16.1044	-1.13627	Q14344	GNA13_HUMAN	Guanine nucleotide-binding protein subunit alpha-13 (G alpha-13) (G-protein subunit alpha-13)	GNA13	GNA13
12.3403	14.4808	13.5245	14.168	13.7632	14.3812	sp		350	2207	13.2093	14.3433	-1.134	Q70UQ0-4	IKIP_HUMAN	Inhibitor of nuclear factor kappa-B kinase-interacting protein (I kappa-B kinase-interacting protein) (IKBKB-interacting protein) (IKK-interacting protein)	IKBIP IKIP	IKBIP
14.347	14.6332	13.6157	14.5182	12.0003	14.2001	sp		201	2005	13.321	14.4505	-1.12949	Q9NP90	RAB9B_HUMAN	Ras-related protein Rab-9B (Rab-9-like protein) (Rab-9L)	RAB9B RAB9L	RAB9B
12.857	14.1264	12.4676	14.3751	14.0092	14.1955	tr		420	1080	13.1113	14.2323	-1.12105	A0A087WSV8	A0A087WSV8_HUMAN	Nucleobindin 2, isoform CRA_b (Nucleobindin-2)	NUCB2 hCG_15642	NUCB2
11.9777	14.0084	14.2343	13.9379	12.456	14.0581	sp		736	1333	12.8893	14.0015	-1.11214	Q8IVL6	P3H3_HUMAN	Prolyl 3-hydroxylase 3 (EC 1.14.11.7) (Leprecan-like protein 2) (Protein B)	P3H3 LEPREL2	P3H3
11.4424	14.5633	14.0989	14.1969	14.4956	14.5793	sp		277	2174	13.3457	14.4465	-1.10082	P20645	MPRD_HUMAN	Cation-dependent mannose-6-phosphate receptor (CD Man-6-P receptor) (CD-MPR) (46 kDa mannose 6-phosphate receptor) (MPR 46)	M6PR MPR46 MPRD	M6PR
13.7595	14.1054	13.6008	13.8482	11.4877	14.1691	sp		875	2533	12.9493	14.0409	-1.09157	Q9NXC5	MIO_HUMAN	GATOR complex protein MIOS (Missing oocyte meiosis regulator homolog)	MIOS	MIOS
13.82	13.6242	11.3951	12.9305	11.3314	13.2641	sp		1302	499	12.1822	13.2729	-1.09076	Q0VF96	CGNL1_HUMAN	Cingulin-like protein 1 (Junction-associated coiled-coil protein) (Paracingulin)	CGNL1 JACOP KIAA1749	CGNL1
14.148	14.1688	13.9822	13.8312	10.7657	14.1551	tr		174	2241	12.9653	14.0517	-1.08643	A0A087WZA9	A0A087WZA9_HUMAN	Transmembrane protein 120A (Fragment)	TMEM120A	TMEM120A
11.27	13.4566	12.1488	13.8245	13.0608	12.4497	sp		480	1817	12.1599	13.2436	-1.08372	Q96EY1	DNJA3_HUMAN	DnaJ homolog subfamily A member 3, mitochondrial (DnaJ protein Tid-1) (hTid-1) (Hepatocellular carcinoma-associated antigen 57) (Tumorous imaginal discs protein Tid56 homolog)	DNAJA3 HCA57 TID1	DNAJA3
17.0188	17.6938	15.5749	17.2581	16.9364	17.8143	sp		201	1273	16.51	17.5887	-1.07871	Q01995	TAGL_HUMAN	Transgelin (22 kDa actin-binding protein) (Protein WS3-10) (Smooth muscle protein 22-alpha) (SM22-alpha)	TAGLN SM22 WS3-10	TAGLN
16.2224	17.3153	17.0177	17.3354	15.5566	17.3641	sp		737	811	16.2656	17.3383	-1.07271	O00469-2	PLOD2_HUMAN	Procollagen-lysine,2-oxoglutarate 5-dioxygenase 2 (EC 1.14.11.4) (Lysyl hydroxylase 2) (LH2)	PLOD2	PLOD2
16.7523	16.3249	15.7993	16.2384	13.2999	16.4665	sp		572	1009	15.2838	16.3433	-1.05948	Q14194-2	DPYL1_HUMAN	Dihydropyrimidinase-related protein 1 (DRP-1) (Collapsin response mediator protein 1) (CRMP-1) (Unc-33-like phosphoprotein 3) (ULIP-3)	CRMP1 DPYSL1 ULIP3	CRMP1
13.5028	12.5949	11.3349	14.7547	14.014	14.6694	sp		480	2231	12.9506	14.0063	-1.05574	O43854	EDIL3_HUMAN	EGF-like repeat and discoidin I-like domain-containing protein 3 (Developmentally-regulated endothelial cell locus 1 protein) (Integrin-binding protein DEL1)	EDIL3 DEL1	EDIL3
12.1626	12.7659	11.2259	13.6499	12.5774	12.6947	sp		341	2271	11.9887	13.0368	-1.04815	Q86W42	THOC6_HUMAN	THO complex subunit 6 homolog (Functional spliceosome-associated protein 35) (fSAP35) (WD repeat-containing protein 58)	THOC6 WDR58 PSEC0006	THOC6
14.9891	15.5582	13.6271	15.6172	14.8932	15.4706	sp		248	2156	14.5031	15.5487	-1.04557	P09496	CLCA_HUMAN	Clathrin light chain A (Lca)	CLTA	CLTA
15.2025	16.0195	15.4228	15.4062	13.8563	16.1741	sp		780	1706	14.8272	15.8666	-1.03936	Q709F0	ACD11_HUMAN	Acyl-CoA dehydrogenase family member 11 (ACAD-11) (EC 1.3.8.-)	ACAD11	ACAD11
14.739	16.4994	16.1448	16.1312	15.2106	16.5247	sp		1179	1144	15.3648	16.3851	-1.02032	P56199	ITA1_HUMAN	Integrin alpha-1 (CD49 antigen-like family member A) (Laminin and collagen receptor) (VLA-1) (CD antigen CD49a)	ITGA1	ITGA1
15.1087	15.2184	12.5632	15.0565	14.5499	14.9981	sp		514	1256	14.0739	15.091	-1.01706	Q9BZK7	TBL1R_HUMAN	F-box-like/WD repeat-containing protein TBL1XR1 (Nuclear receptor corepressor/HDAC3 complex subunit TBLR1) (TBL1-related protein 1) (Transducin beta-like 1X-related protein 1)	TBL1XR1 IRA1 TBLR1	TBL1XR1
12.0333	14.0594	13.9195	14.2359	13.5968	14.3043	sp		660	769	13.1832	14.1999	-1.0167	Q15067-2	ACOX1_HUMAN	Peroxisomal acyl-coenzyme A oxidase 1 (AOX) (EC 1.3.3.6) (Palmitoyl-CoA oxidase) (Straight-chain acyl-CoA oxidase) (SCOX) [Cleaved into: Peroxisomal acyl-CoA oxidase 1, A chain;Peroxisomal acyl-CoA oxidase 1, B chain;Peroxisomal acyl-CoA oxidase 1, C chain]	ACOX1 ACOX	ACOX1
14.0876	14.4563	13.705	14.341	12.4366	14.4661	sp		432	2538	13.4097	14.4211	-1.01142	Q8TB61	S35B2_HUMAN	Adenosine 3'-phospho 5'-phosphosulfate transporter 1 (PAPS transporter 1) (Putative MAPK-activating protein PM15) (Putative NF-kappa-B-activating protein 48) (Solute carrier family 35 member B2)	SLC35B2 PAPST1 PSEC0149	SLC35B2
13.4644	14.883	14.4974	15.2734	13.5359	14.3705	tr		808	1608	13.8326	14.8423	-1.00975	A0A140T9T7	A0A140T9T7_HUMAN	Antigen peptide transporter 1	TAP1	TAP1
15.6	15.6185	15.6796	15.4999	12.5686	15.7501	sp		184	839	14.6161	15.6228	-1.00678	P62834	RAP1A_HUMAN	Ras-related protein Rap-1A (C21KG) (G-22K) (GTP-binding protein smg p21A) (Ras-related protein Krev-1)	RAP1A KREV1	RAP1A
15.2839	15.5775	15.2942	15.4435	12.9585	15.5299	sp		76	2342	14.5122	15.5169	-1.00477	A8MWD9	RUXGL_HUMAN	Putative small nuclear ribonucleoprotein G-like protein 15	SNRPGP15	SNRPGP15
13.0131	15.1914	14.7878	15.1272	14.9699	15.4653	sp		738	716	14.2569	15.2613	-1.00437	O60568	PLOD3_HUMAN	Multifunctional procollagen lysine hydroxylase and glycosyltransferase LH3 [Includes: Procollagen-lysine,2-oxoglutarate 5-dioxygenase 3 (EC 1.14.11.4) (Lysyl hydroxylase 3) (LH3);Procollagen glycosyltransferase (EC 2.4.1.50) (EC 2.4.1.66) (Galactosylhydroxylysine-glucosyltransferase) (Procollagen galactosyltransferase) (Procollagen glucosyltransferase)]	PLOD3	PLOD3
13.8595	14.3464	12.0314	14.5943	14.5816	14.5385	sp		1011	951	13.4908	14.4931	-1.00223	Q86W92	LIPB1_HUMAN	Liprin-beta-1 (Protein tyrosine phosphatase receptor type f polypeptide-interacting protein-binding protein 1) (PTPRF-interacting protein-binding protein 1) (hSGT2)	PPFIBP1 KIAA1230	PPFIBP1
15.538	13.3832	14.4562	16.8177	14.0526	16.8368	tr		203	2140	14.6823	15.6792	-0.99692	A0A024R216	A0A024R216_HUMAN	Hepatoma-derived growth factor, related protein 3, isoform CRA_a (Hepatoma-derived growth factor-related protein 3)	HDGFRP3 hCG_1811535	HDGFRP3
12.7995	14.6794	12.902	13.3146	14.2274	14.9241	sp		105	2106	13.3096	14.306	-0.996417	P31949	S10AB_HUMAN	Protein S100-A11 (Calgizzarin) (Metastatic lymph node gene 70 protein) (MLN 70) (Protein S100-C) (S100 calcium-binding protein A11) [Cleaved into: Protein S100-A11, N-terminally processed]	S100A11 MLN70 S100C	S100A11
17.8849	17.7183	14.5998	17.8744	17.9631	17.8413	sp		455	1609	16.816	17.8113	-0.995333	Q13867	BLMH_HUMAN	Bleomycin hydrolase (BH) (BLM hydrolase) (BMH) (EC 3.4.22.40)	BLMH	BLMH
14.8984	15.3916	14.8642	15.5299	13.3906	15.2064	sp		284	1133	14.3844	15.376	-0.991611	Q9BPW8	NIPS1_HUMAN	Protein NipSnap homolog 1 (NipSnap1)	NIPSNAP1	NIPSNAP1
13.3231	15.3311	14.8579	15.2595	14.8333	15.3953	sp		365	1696	14.3381	15.3286	-0.990528	P16190	1A33_HUMAN	HLA class I histocompatibility antigen, A-33 alpha chain (Aw-19) (Aw-33) (MHC class I antigen A*33)	HLA-A HLAA	HLA-A
15.218	15.33	15.1327	15.2315	12.8097	15.5499	sp		904	1848	14.3868	15.3705	-0.983725	Q8IYB3-2	SRRM1_HUMAN	Serine/arginine repetitive matrix protein 1 (SR-related nuclear matrix protein of 160 kDa) (SRm160) (Ser/Arg-related nuclear matrix protein)	SRRM1 SRM160	SRRM1
13.5103	16.028	15.069	15.7969	15.4202	15.096	sp		252	1907	14.6665	15.6403	-0.973803	P33316	DUT_HUMAN	Deoxyuridine 5'-triphosphate nucleotidohydrolase, mitochondrial (dUTPase) (EC 3.6.1.23) (dUTP pyrophosphatase)	DUT	DUT
12.1731	12.4717	12.2711	12.6199	10.5092	12.7712	sp		902	1264	11.6511	12.6209	-0.969809	Q7Z2W4	ZCCHV_HUMAN	Zinc finger CCCH-type antiviral protein 1 (ADP-ribosyltransferase diphtheria toxin-like 13) (ARTD13) (Inactive Poly [ADP-ribose] polymerase 13) (PARP13) (Zinc finger CCCH domain-containing protein 2) (Zinc finger antiviral protein) (ZAP)	ZC3HAV1 ZC3HDC2 PRO1677	ZC3HAV1
13.4961	13.6569	12.1658	13.1804	12.1676	13.8887	tr		1027	2324	12.6098	13.5753	-0.96547	F8W1F5	F8W1F5_HUMAN	Formin-like protein 3	FMNL3	FMNL3
13.5236	14.0942	12.066	13.999	14.0266	14.4139	sp		353	1931	13.2054	14.169	-0.963653	Q8TDN6	BRX1_HUMAN	Ribosome biogenesis protein BRX1 homolog (Brix domain-containing protein 2)	BRIX1 BRIX BXDC2	BRIX1
11.9724	13.2497	13.5737	13.9372	12.5531	13.7465	sp		1194	1440	12.6997	13.6445	-0.944747	O75054	IGSF3_HUMAN	Immunoglobulin superfamily member 3 (IgSF3) (Glu-Trp-Ile EWI motif-containing protein 3) (EWI-3)	IGSF3 EWI3 KIAA0466	IGSF3
14.8541	15.4392	14.7861	15.0637	13.6052	15.5541	tr		288	2167	14.4152	15.3524	-0.93721	G3XAN4	G3XAN4_HUMAN	Translocating chain-associated membrane protein 1 (Translocation associated membrane protein 1, isoform CRA_a)	TRAM1 hCG_18447	TRAM1
14.2195	14.1741	11.5903	14.3983	14.1951	14.2394	tr		1370	1748	13.335	14.2706	-0.935616	A0A087WYN9	A0A087WYN9_HUMAN	ATP-dependent RNA helicase DHX29 (EC 3.6.4.13) (DEAH box protein 29)	DHX29	DHX29
14.7509	12.543	12.5646	15.4792	13.4633	15.5365	sp		299	2414	13.5929	14.5196	-0.926653	Q9NP98	MYOZ1_HUMAN	Myozenin-1 (Calsarcin-2) (Filamin-, actinin- and telethonin-binding protein) (Protein FATZ)	MYOZ1 MYOZ	MYOZ1
14.6206	14.8949	12.3764	14.8109	14.7764	14.8413	sp		660	2249	13.9244	14.8491	-0.924613	O15523	DDX3Y_HUMAN	ATP-dependent RNA helicase DDX3Y (EC 3.6.4.13) (DEAD box protein 3, Y-chromosomal)	DDX3Y DBY	DDX3Y
13.0216	14.4766	12.0244	12.8313	13.2165	13.7109	sp		312	2380	12.7542	13.6729	-0.918777	Q96P16	RPR1A_HUMAN	Regulation of nuclear pre-mRNA domain-containing protein 1A (Cyclin-dependent kinase inhibitor 2B-related protein) (p15INK4B-related protein)	RPRD1A P15RS	RPRD1A
15.595	16.0931	14.2218	16.2449	15.7999	16.0204	sp		203	2170	15.2056	16.1195	-0.913887	P51153	RAB13_HUMAN	Ras-related protein Rab-13 (Cell growth-inhibiting gene 4 protein)	RAB13 GIG4	RAB13
13.8583	13.4454	13.5992	13.6794	13.6708	16.7378	sp		1186	2336	13.7094	14.6209	-0.91144	Q9ULU4-9	PKCB1_HUMAN	Protein kinase C-binding protein 1 (Cutaneous T-cell lymphoma-associated antigen se14-3) (CTCL-associated antigen se14-3) (Rack7) (Zinc finger MYND domain-containing protein 8)	ZMYND8 KIAA1125 PRKCBP1 RACK7	ZMYND8
14.5612	14.6855	12.8592	14.9398	14.3279	14.8412	sp		746	1705	13.9161	14.8222	-0.906081	Q96TA1	NIBL1_HUMAN	Protein Niban 2 (Meg-3) (Melanoma invasion by ERK) (MINERVA) (Niban-like protein 1) (Protein FAM129B)	NIBAN2 C9orf88 FAM129B	NIBAN2
11.7425	13.7043	13.3761	14.2575	14.501	14.3638	sp		715	668	13.2065	14.1085	-0.901986	Q13330	MTA1_HUMAN	Metastasis-associated protein MTA1	MTA1	MTA1
14.2729	15.7184	15.4828	15.5936	14.5258	15.6477	sp		748	1801	14.7605	15.6532	-0.892698	O14672	ADA10_HUMAN	Disintegrin and metalloproteinase domain-containing protein 10 (ADAM 10) (EC 3.4.24.81) (CDw156) (Kuzbanian protein homolog) (Mammalian disintegrin-metalloprotease) (CD antigen CD156c)	ADAM10 KUZ MADM	ADAM10
13.2906	13.5267	13.345	13.3773	10.882	13.2652	sp		368	1591	12.5059	13.3898	-0.883893	P78406	RAE1L_HUMAN	mRNA export factor (Rae1 protein homolog) (mRNA-associated protein mrnp 41)	RAE1 MRNP41	RAE1
13.6934	13.4982	13.1962	13.5801	10.97	13.4211	sp		244	2352	12.6199	13.4998	-0.879981	Q99426	TBCB_HUMAN	Tubulin-folding cofactor B (Cytoskeleton-associated protein 1) (Cytoskeleton-associated protein CKAPI) (Tubulin-specific chaperone B)	TBCB CG22 CKAP1	TBCB
8.94284	13.7281	13.76	13.7156	13.7624	11.6541	sp		1074	1182	12.1551	13.0326	-0.877554	Q96KR1	ZFR_HUMAN	Zinc finger RNA-binding protein (hZFR) (M-phase phosphoprotein homolog)	ZFR	ZFR
19.6031	19.6127	17.179	19.6236	19.3979	19.5634	tr		964	399	18.7267	19.5999	-0.873213	F5H2F4	F5H2F4_HUMAN	C-1-tetrahydrofolate synthase, cytoplasmic	MTHFD1	MTHFD1
11.7655	14.2087	14.3464	14.0463	13.8338	14.3092	sp		323	2369	13.3153	14.1881	-0.872799	O15121	DEGS1_HUMAN	Sphingolipid delta(4)-desaturase DES1 (EC 1.14.19.17) (Cell migration-inducing gene 15 protein) (Degenerative spermatocyte homolog 1) (Membrane lipid desaturase)	DEGS1 DES1 MLD MIG15	DEGS1
12.3047	13.9681	13.4069	14.5324	13.878	13.7013	sp		1214	1630	13.1965	14.0673	-0.870734	Q8TD43	TRPM4_HUMAN	Transient receptor potential cation channel subfamily M member 4 (hTRPM4) (Calcium-activated non-selective cation channel 1) (Long transient receptor potential channel 4) (LTrpC-4) (LTrpC4) (Melastatin-4)	TRPM4 LTRPC4	TRPM4
13.5932	15.7572	14.8509	15.0538	14.7738	15.0076	sp		628	1358	14.406	15.2729	-0.8669	Q96RF0-2	SNX18_HUMAN	Sorting nexin-18 (SH3 and PX domain-containing protein 3B) (Sorting nexin-associated Golgi protein 1)	SNX18 SH3PXD3B SNAG1	SNX18
12.4639	12.7071	13.1601	12.8568	10.4119	13.0685	sp		433	2582	12.012	12.8775	-0.865479	Q99538	LGMN_HUMAN	Legumain (EC 3.4.22.34) (Asparaginyl endopeptidase) (Protease, cysteine 1)	LGMN PRSC1	LGMN
15.4541	15.4242	15.1843	15.5477	13.4127	15.6666	sp		201	2162	14.6837	15.5461	-0.862421	Q8WUK0	PTPM1_HUMAN	Phosphatidylglycerophosphatase and protein-tyrosine phosphatase 1 (EC 3.1.3.27) (PTEN-like phosphatase) (Phosphoinositide lipid phosphatase) (Protein-tyrosine phosphatase mitochondrial 1) (EC 3.1.3.16) (EC 3.1.3.48)	PTPMT1 MOSP PLIP PNAS-129	PTPMT1
14.2632	14.1325	11.2026	14.0649	14.3963	14.2133	sp		796	2644	13.2874	14.1369	-0.849552	Q9BWU0	NADAP_HUMAN	Kanadaptin (Human lung cancer oncogene 3 protein) (HLC-3) (Kidney anion exchanger adapter protein) (Solute carrier family 4 anion exchanger member 1 adapter protein)	SLC4A1AP HLC3	SLC4A1AP
12.1503	14.4368	14.2967	14.6025	14.4952	14.4442	sp		445	2383	13.6474	14.4945	-0.847097	Q96M27-3	PRRC1_HUMAN	Protein PRRC1 (Proline-rich and coiled-coil-containing protein 1)	PRRC1	PRRC1
14.2329	14.1286	11.7536	14.1804	14.2409	14.4583	sp		475	781	13.4091	14.2558	-0.84663	Q9UBB4	ATX10_HUMAN	Ataxin-10 (Brain protein E46 homolog) (Spinocerebellar ataxia type 10 protein)	ATXN10 SCA10	ATXN10
13.3218	13.2858	11.7625	12.702	11.3533	12.9865	sp		294	2445	12.1458	12.9914	-0.845592	Q9UL40-3	ZN346_HUMAN	Zinc finger protein 346 (Just another zinc finger protein)	ZNF346 JAZ	ZNF346
12.2118	14.0451	14.1188	14.0952	12.9337	13.6523	sp		504	1784	13.0881	13.9309	-0.842779	P46937	YAP1_HUMAN	Transcriptional coactivator YAP1 (Yes-associated protein 1) (Protein yorkie homolog) (Yes-associated protein YAP65 homolog)	YAP1 YAP65	YAP1
14.9281	14.9961	14.9725	14.9297	12.3116	14.8012	sp		1085	1635	14.0707	14.909	-0.838305	Q9UP95	S12A4_HUMAN	Solute carrier family 12 member 4 (Electroneutral potassium-chloride cotransporter 1) (Erythroid K-Cl cotransporter 1) (hKCC1)	SLC12A4 KCC1	SLC12A4
14.2906	14.5251	14.3645	13.3817	9.18165	12.442	tr		230	2527	12.6123	13.4496	-0.837339	K7ELG9	K7ELG9_HUMAN	Protein LSM12 homolog	LSM12	LSM12
11.2627	13.7604	13.4374	13.9063	14.0565	13.5983	tr		716	2563	12.9189	13.755	-0.83615	A0A0U1RR70	A0A0U1RR70_HUMAN	Serine/threonine-protein kinase DCLK2	DCLK2	DCLK2
13.6042	13.9374	13.8063	13.7088	11.1658	13.4324	sp		104	2593	12.8587	13.6928	-0.834102	Q5U5X0	LYRM7_HUMAN	Complex III assembly factor LYRM7 (LYR motif-containing protein 7)	LYRM7 C5orf31 MZM1L	LYRM7
15.1306	15.2436	15.1249	15.4296	13.3253	15.3839	sp		564	1687	14.5269	15.3523	-0.825433	Q9HA77	SYCM_HUMAN	Probable cysteine--tRNA ligase, mitochondrial (EC 6.1.1.16) (Cysteinyl-tRNA synthetase) (CysRS)	CARS2 OK/SW-cl.10	CARS2
13.6904	13.854	14.2715	14.1693	11.3342	13.7312	tr		375	1710	13.0987	13.9182	-0.819457	E7ETU7	E7ETU7_HUMAN	39S ribosomal protein L3, mitochondrial	MRPL3	MRPL3
13.3183	15.1514	14.8745	15.2848	15.0083	15.2177	tr		509	1959	14.4004	15.218	-0.817593	H3BS10	H3BS10_HUMAN	Beta-hexosaminidase (EC 3.2.1.52)	HEXA	HEXA
16.2387	16.5755	16.0832	16.9638	15.4355	16.6575	sp		795	414	15.9191	16.7323	-0.813114	P54886	P5CS_HUMAN	Delta-1-pyrroline-5-carboxylate synthase (P5CS) (Aldehyde dehydrogenase family 18 member A1) [Includes: Glutamate 5-kinase (GK) (EC 2.7.2.11) (Gamma-glutamyl kinase);Gamma-glutamyl phosphate reductase (GPR) (EC 1.2.1.41) (Glutamate-5-semialdehyde dehydrogenase) (Glutamyl-gamma-semialdehyde dehydrogenase)]	ALDH18A1 GSAS P5CS PYCS	ALDH18A1
16.6352	16.1715	16.7098	16.3584	12.7677	15.9959	sp		473	1760	15.3709	16.1753	-0.804362	O15269	SPTC1_HUMAN	Serine palmitoyltransferase 1 (EC 2.3.1.50) (Long chain base biosynthesis protein 1) (LCB 1) (Serine-palmitoyl-CoA transferase 1) (SPT 1) (SPT1)	SPTLC1 LCB1	SPTLC1
10.6389	14.5409	13.9388	14.6225	13.6401	11.4631	tr		243	2530	12.7393	13.5422	-0.802872	F8VW96	F8VW96_HUMAN	Cysteine and glycine-rich protein 2	CSRP2	CSRP2
14.8745	15.1436	14.288	15.1875	13.7167	14.9414	sp		957	1780	14.2931	15.0908	-0.797759	Q07075	AMPE_HUMAN	Glutamyl aminopeptidase (EAP) (EC 3.4.11.7) (Aminopeptidase A) (AP-A) (Differentiation antigen gp160) (CD antigen CD249)	ENPEP	ENPEP
14.7368	15.0331	14.7037	15.2325	15.1279	16.6903	sp		471	2232	14.8561	15.652	-0.795842	P48723	HSP13_HUMAN	Heat shock 70 kDa protein 13 (Microsomal stress-70 protein ATPase core) (Stress-70 protein chaperone microsome-associated 60 kDa protein)	HSPA13 STCH	HSPA13
13.1588	15.176	15.1248	15.3027	15.2374	15.4112	sp		831	1492	14.507	15.2966	-0.789659	Q99523	SORT_HUMAN	Sortilin (100 kDa NT receptor) (Glycoprotein 95) (Gp95) (Neurotensin receptor 3) (NT3) (NTR3)	SORT1	SORT1
10.9541	13.0424	12.2873	11.8763	12.0674	12.7562	sp		1806	2573	11.7696	12.5583	-0.788703	Q9BY89	K1671_HUMAN	Uncharacterized protein KIAA1671	KIAA1671	KIAA1671
13.7759	14.5129	13.0649	14.893	14.1558	13.9492	sp		758	2134	13.6656	14.4517	-0.786145	P38435	VKGC_HUMAN	Vitamin K-dependent gamma-carboxylase (EC 4.1.1.90) (Gamma-glutamyl carboxylase) (Peptidyl-glutamate 4-carboxylase) (Vitamin K gamma glutamyl carboxylase)	GGCX GC	GGCX
13.7896	15.2942	14.8672	15.4808	15.1815	15.4134	tr		223	1969	14.6128	15.3961	-0.783343	E9PGT1	E9PGT1_HUMAN	Translin	TSN	TSN
16.5193	16.8159	16.0963	16.5674	15.4505	17.0309	sp		2602	85	16.022	16.8047	-0.782732	O75369	FLNB_HUMAN	Filamin-B (FLN-B) (ABP-278) (ABP-280 homolog) (Actin-binding-like protein) (Beta-filamin) (Filamin homolog 1) (Fh1) (Filamin-3) (Thyroid autoantigen) (Truncated actin-binding protein) (Truncated ABP)	FLNB FLN1L FLN3 TABP TAP	FLNB
10.9209	13.0725	12.9768	13.4517	13.7057	13.4219	sp		330	2666	12.5345	13.3154	-0.780916	Q8N5I4	DHRSX_HUMAN	Dehydrogenase/reductase SDR family member on chromosome X (EC 1.1.-.-) (DHRSXY) (Short chain dehydrogenase/reductase family 46C member 1) (Short chain dehydrogenase/reductase family 7C member 6)	DHRSX CXorf11 DHRS5X SDR46C1 SDR7C6 UNQ6508/PRO21433	DHRSX
14.0068	13.9006	12.3084	13.6401	12.812	13.913	sp		377	1727	13.0424	13.8179	-0.775523	Q8TCT9	HM13_HUMAN	Minor histocompatibility antigen H13 (EC 3.4.23.-) (Intramembrane protease 1) (IMP-1) (IMPAS-1) (hIMP1) (Presenilin-like protein 3) (Signal peptide peptidase)	HM13 H13 IMP1 PSL3 SPP MSTP086	HM13
8.40748	12.0705	10.1918	10.3322	11.0987	9.6097	sp		782	1086	9.89932	10.6708	-0.771466	Q9BZL4-4	PP12C_HUMAN	Protein phosphatase 1 regulatory subunit 12C (Protein phosphatase 1 myosin-binding subunit of 85 kDa) (Protein phosphatase 1 myosin-binding subunit p85)	PPP1R12C LENG3 MBS85	PPP1R12C
11.7571	14.7413	15.0564	15.3072	15.5916	14.6639	tr		192	2461	14.135	14.9041	-0.769113	C9JQV0	C9JQV0_HUMAN	Uncharacterized protein C7orf50 (Fragment)	C7orf50	C7orf50
16.7945	16.7743	14.565	16.8719	16.8512	16.8687	sp		175	1991	16.0702	16.8383	-0.76808	Q9NRX2	RM17_HUMAN	39S ribosomal protein L17, mitochondrial (L17mt) (MRP-L17) (LYST-interacting protein 2) (Mitochondrial large ribosomal subunit protein bL17m)	MRPL17 LIP2	MRPL17
14.173	14.4155	14.5911	14.4679	12.2212	14.4031	sp		172	2458	13.6618	14.4288	-0.767056	O60830-2	TI17B_HUMAN	Mitochondrial import inner membrane translocase subunit Tim17-B	TIMM17B TIM17B JM3	TIMM17B
15.3508	15.0179	15.3566	15.2838	12.3419	15.0326	sp		289	1597	14.3497	15.1114	-0.761692	P46926	GNPI1_HUMAN	Glucosamine-6-phosphate isomerase 1 (EC 3.5.99.6) (Glucosamine-6-phosphate deaminase 1) (GNPDA 1) (GlcN6P deaminase 1) (Oscillin)	GNPDA1 GNPI HLN KIAA0060	GNPDA1
13.7394	15.5683	11.2579	12.8322	14.6005	13.4679	sp		327	2182	13.1993	13.9561	-0.756864	O75436	VP26A_HUMAN	Vacuolar protein sorting-associated protein 26A (Vesicle protein sorting 26A) (hVPS26)	VPS26A VPS26	VPS26A
16.0717	16.3535	15.1923	16.42	14.9288	15.6891	sp		717	1204	15.3976	16.1542	-0.756577	Q9UH99	SUN2_HUMAN	SUN domain-containing protein 2 (Protein unc-84 homolog B) (Rab5-interacting protein) (Rab5IP) (Sad1/unc-84 protein-like 2)	SUN2 FRIGG KIAA0668 RAB5IP UNC84B	SUN2
14.1332	12.2476	10.1444	14.3357	13.372	13.3266	tr		102	2508	12.5499	13.3033	-0.753388	A0A0C4DH16	A0A0C4DH16_HUMAN	BET1-like protein	BET1L	BET1L
14.6349	14.8442	14.6019	15.3409	14.4851	15.7859	sp		322	2210	14.574	15.3237	-0.749678	Q96NB2	SFXN2_HUMAN	Sideroflexin-2	SFXN2	SFXN2
14.6446	14.9229	13.2915	15.1791	14.7085	14.7911	tr		641	2543	14.2148	14.9644	-0.74951	B7Z683	B7Z683_HUMAN	Active breakpoint cluster region-related protein (cDNA FLJ54747, highly similar to Active breakpoint cluster region-related protein)	ABR	ABR
16.1254	16.3265	14.2747	16.365	16.0838	16.0373	sp		325	1246	15.4946	16.2429	-0.748301	P43897	EFTS_HUMAN	Elongation factor Ts, mitochondrial (EF-Ts) (EF-TsMt)	TSFM	TSFM
16.3575	16.7027	15.2017	16.7151	16.2523	16.6296	sp		475	708	15.9372	16.6824	-0.745245	Q01518	CAP1_HUMAN	Adenylyl cyclase-associated protein 1 (CAP 1)	CAP1 CAP	CAP1
13.9477	16.3135	16.3244	16.4076	16.3633	16.1351	sp		262	2473	15.5451	16.2854	-0.740274	Q8IXM6	NRM_HUMAN	Nurim (Nuclear envelope membrane protein) (Nuclear rim protein)	NRM NRM29 UNQ555/PRO1112	NRM
14.576	14.3927	14.6234	14.5009	11.9453	14.4531	sp		839	1469	13.7149	14.4489	-0.73405	Q7Z3C6	ATG9A_HUMAN	Autophagy-related protein 9A (APG9-like 1) (mATG9)	ATG9A APG9L1	ATG9A
13.2324	13.5489	11.9597	13.4737	13.1603	13.5152	sp		1337	1715	12.7841	13.5126	-0.728477	Q29RF7	PDS5A_HUMAN	Sister chromatid cohesion protein PDS5 homolog A (Cell proliferation-inducing gene 54 protein) (Sister chromatid cohesion protein 112) (SCC-112)	PDS5A KIAA0648 PDS5 PIG54	PDS5A
17.9147	17.9578	18.0865	17.9587	15.7725	17.9978	sp		783	1203	17.2579	17.9714	-0.713531	Q9NR30	DDX21_HUMAN	Nucleolar RNA helicase 2 (EC 3.6.4.13) (DEAD box protein 21) (Gu-alpha) (Nucleolar RNA helicase Gu) (Nucleolar RNA helicase II) (RH II/Gu)	DDX21	DDX21
12.8944	13.9366	14.1918	14.8877	14.0133	14.4152	sp		974	740	13.6999	14.4131	-0.713282	Q96A65	EXOC4_HUMAN	Exocyst complex component 4 (Exocyst complex component Sec8)	EXOC4 KIAA1699 SEC8 SEC8L1	EXOC4
15.5236	15.347	15.5011	15.5337	13.2697	15.5495	sp		95	2505	14.7648	15.4768	-0.711968	P61956	SUMO2_HUMAN	Small ubiquitin-related modifier 2 (SUMO-2) (HSMT3) (SMT3 homolog 2) (SUMO-3) (Sentrin-2) (Ubiquitin-like protein SMT3B) (Smt3B)	SUMO2 SMT3B SMT3H2	SUMO2
15.6981	15.7647	15.7022	15.9443	14.1019	15.9233	sp		453	903	15.1674	15.8775	-0.710063	Q9P291	ARMX1_HUMAN	Armadillo repeat-containing X-linked protein 1 (ARM protein lost in epithelial cancers on chromosome X 1) (Protein ALEX1)	ARMCX1 ALEX1 AD032	ARMCX1
13.276	13.2179	11.0093	13.3494	13.371	13.2061	sp		2190	1783	12.5521	13.2578	-0.705737	Q8N201	INT1_HUMAN	Integrator complex subunit 1 (Int1)	INTS1 KIAA1440 UNQ1821/PRO3434	INTS1
12.7582	14.7365	14.64	14.5881	14.3718	14.5479	sp		229	2680	13.9234	14.6242	-0.700796	Q969E2	SCAM4_HUMAN	Secretory carrier-associated membrane protein 4 (Secretory carrier membrane protein 4)	SCAMP4	SCAMP4
14.6359	14.6806	14.4346	14.879	13.011	14.6187	sp		475	2385	14.0272	14.7261	-0.698893	Q7L3T8	SYPM_HUMAN	Probable proline--tRNA ligase, mitochondrial (EC 6.1.1.15) (Prolyl-tRNA synthetase) (ProRS)	PARS2	PARS2
17.62	17.808	17.5959	17.909	16.2737	17.8667	tr		390	833	17.1632	17.8612	-0.698008	E9PF18	E9PF18_HUMAN	Hydroxyacyl-coenzyme A dehydrogenase, mitochondrial	HADH	HADH
14.4022	13.8952	11.7603	13.7164	15.0865	15.7305	sp		276	1581	13.7496	14.4474	-0.697721	Q86Y82	STX12_HUMAN	Syntaxin-12	STX12	STX12
14.6556	14.3554	14.628	14.2821	11.752	14.4795	sp		776	941	13.6785	14.3723	-0.693795	Q13616	CUL1_HUMAN	Cullin-1 (CUL-1)	CUL1	CUL1
15.9238	16.0614	14.2555	16.0344	15.883	16.0465	tr		411	1672	15.3541	16.0474	-0.693312	A0A1B0GW37	A0A1B0GW37_HUMAN	Nuclear factor 1	NFIB	NFIB
15.5955	15.2094	13.1918	15.3026	15.3022	15.6444	tr		816	1023	14.6965	15.3855	-0.68899	G3V529	G3V529_HUMAN	ATP-dependent RNA helicase DDX24	DDX24	DDX24
15.6677	15.4428	14.1882	15.1202	14.3026	15.6591	sp		1375	1465	14.7195	15.4074	-0.687848	Q96K76	UBP47_HUMAN	Ubiquitin carboxyl-terminal hydrolase 47 (EC 3.4.19.12) (Deubiquitinating enzyme 47) (Ubiquitin thioesterase 47) (Ubiquitin-specific-processing protease 47)	USP47	USP47
14.3516	14.2915	12.1728	14.4073	14.1837	14.0548	tr		509	2618	13.5694	14.2512	-0.681795	A2A2G4	A2A2G4_HUMAN	Alpha-1,3-glucosyltransferase (EC 2.4.1.-)	ALG6	ALG6
14.5861	14.3269	12.8723	14.3878	13.1299	13.9173	tr		206	2397	13.5294	14.2106	-0.681217	C9JPX5	C9JPX5_HUMAN	STARD3 N-terminal-like protein (Fragment)	STARD3NL	STARD3NL
15.5897	15.2527	12.7293	15.3221	15.7413	15.5172	sp		496	1673	14.6868	15.364	-0.677226	P30419	NMT1_HUMAN	Glycylpeptide N-tetradecanoyltransferase 1 (EC 2.3.1.97) (Myristoyl-CoA:protein N-myristoyltransferase 1) (NMT 1) (Type I N-myristoyltransferase) (Peptide N-myristoyltransferase 1)	NMT1 NMT	NMT1
9.49809	12.0379	14.1453	14.1056	14.4733	13.9968	sp		708	1211	12.7056	13.3801	-0.674518	P49959-3	MRE11_HUMAN	Double-strand break repair protein MRE11 (EC 3.1.-.-) (Double-strand break repair protein MRE11A) (Meiotic recombination 11 homolog 1) (MRE11 homolog 1) (Meiotic recombination 11 homolog A) (MRE11 homolog A)	MRE11 HNGS1 MRE11A	MRE11
14.8981	14.9549	14.7189	14.9118	13.0029	14.7246	sp		437	1405	14.2066	14.8637	-0.657091	P62495	ERF1_HUMAN	Eukaryotic peptide chain release factor subunit 1 (Eukaryotic release factor 1) (eRF1) (Protein Cl1) (TB3-1)	ETF1 ERF1 RF1 SUP45L1	ETF1
16.8503	17.2664	16.9931	17.8676	17.1563	17.8187	sp		864	316	16.9999	17.6509	-0.650961	Q9UBC2	EP15R_HUMAN	Epidermal growth factor receptor substrate 15-like 1 (Eps15-related protein) (Eps15R)	EPS15L1 EPS15R	EPS15L1
16.6228	17.0106	16.3895	17	15.9013	16.8539	sp		874	380	16.3045	16.9548	-0.650303	Q9Y678	COPG1_HUMAN	Coatomer subunit gamma-1 (Gamma-1-coat protein) (Gamma-1-COP)	COPG1 COPG	COPG1
16.9389	17.547	16.8849	17.534	16.0514	16.7397	sp		578	1116	16.6251	17.2736	-0.648485	Q14699	RFTN1_HUMAN	Raftlin (Cell migration-inducing gene 2 protein) (Raft-linking protein)	RFTN1 KIAA0084 MIG2	RFTN1
16.2733	17.6774	17.3751	17.5305	17.104	17.4719	sp		290	1462	16.9175	17.5599	-0.642475	Q969X5	ERGI1_HUMAN	Endoplasmic reticulum-Golgi intermediate compartment protein 1 (ER-Golgi intermediate compartment 32 kDa protein) (ERGIC-32)	ERGIC1 ERGIC32 KIAA1181 HT034	ERGIC1
15.6872	15.4966	15.4063	16.2538	14.2364	15.4559	sp		750	807	15.11	15.7354	-0.625433	P22033	MUTA_HUMAN	Methylmalonyl-CoA mutase, mitochondrial (MCM) (EC 5.4.99.2) (Methylmalonyl-CoA isomerase)	MMUT MUT	MMUT
17.0632	18.5314	18.5236	17.3208	16.9651	18.5675	sp		1292	164	17.5173	18.1399	-0.622587	Q9BX66-11	SRBS1_HUMAN	Sorbin and SH3 domain-containing protein 1 (Ponsin) (SH3 domain protein 5) (SH3P12) (c-Cbl-associated protein) (CAP)	SORBS1 KIAA0894 KIAA1296 SH3D5	SORBS1
12.6354	14.1517	13.3796	14.2227	13.9367	13.4297	sp		1008	2306	13.3173	13.9347	-0.617438	Q9H2U1-2	DHX36_HUMAN	ATP-dependent DNA/RNA helicase DHX36 (EC 3.6.4.12) (EC 3.6.4.13) (DEAD/H box polypeptide 36) (DEAH-box protein 36) (G4-resolvase-1) (G4R1) (MLE-like protein 1) (RNA helicase associated with AU-rich element protein)	DHX36 DDX36 KIAA1488 MLEL1 RHAU	DHX36
12.2955	11.9134	12.0077	13.8951	13.7683	14.1076	sp		709	2657	12.6905	13.3054	-0.614885	Q9NUQ8	ABCF3_HUMAN	ATP-binding cassette sub-family F member 3	ABCF3	ABCF3
17.8672	17.8838	16.0461	17.9243	17.8591	17.8078	tr		256	2178	17.2575	17.872	-0.614502	G8JLK1	G8JLK1_HUMAN	Vesicle transport protein USE1	USE1	USE1
12.7194	12.5764	12.9418	12.8555	9.26177	11.3338	sp		312	2634	11.641	12.2552	-0.614276	Q6FI81	CPIN1_HUMAN	Anamorsin (Cytokine-induced apoptosis inhibitor 1) (Fe-S cluster assembly protein DRE2 homolog)	CIAPIN1 CUA001 PRO0915	CIAPIN1
15.6982	15.7805	15.6274	15.6994	14.1441	15.8326	sp		330	2605	15.1566	15.7708	-0.614241	O95218	ZRAB2_HUMAN	Zinc finger Ran-binding domain-containing protein 2 (Zinc finger protein 265) (Zinc finger, splicing)	ZRANB2 ZIS ZNF265	ZRANB2
13.8892	12.4958	12.8484	14.7589	13.318	14.635	sp		636	2252	13.3519	13.9632	-0.611348	Q86U38	NOP9_HUMAN	Nucleolar protein 9	NOP9 C14orf21 KIAA2021	NOP9
11.3156	13.2821	13.5336	13.3205	13.58	13.6595	sp		439	2522	12.8097	13.4207	-0.611006	Q06265	EXOS9_HUMAN	Exosome complex component RRP45 (Autoantigen PM/Scl 1) (Exosome component 9) (P75 polymyositis-scleroderma overlap syndrome-associated autoantigen) (Polymyositis/scleroderma autoantigen 1) (Polymyositis/scleroderma autoantigen 75 kDa) (PM/Scl-75)	EXOSC9 PMSCL1	EXOSC9
18.0492	19.9798	20.0712	20.0159	20.0426	19.9925	sp		439	719	19.3876	19.9961	-0.60841	Q07960	RHG01_HUMAN	Rho GTPase-activating protein 1 (CDC42 GTPase-activating protein) (GTPase-activating protein rhoGAP) (Rho-related small GTPase protein activator) (Rho-type GTPase-activating protein 1) (p50-RhoGAP)	ARHGAP1 CDC42GAP RHOGAP1	ARHGAP1
16.6281	16.7865	16.5702	17.9942	16.8492	17.0903	sp		1590	1613	16.6825	17.2903	-0.607826	P51531	SMCA2_HUMAN	Probable global transcription activator SNF2L2 (EC 3.6.4.-) (ATP-dependent helicase SMARCA2) (BRG1-associated factor 190B) (BAF190B) (Protein brahma homolog) (hBRM) (SNF2-alpha) (SWI/SNF-related matrix-associated actin-dependent regulator of chromatin subfamily A member 2)	SMARCA2 BAF190B BRM SNF2A SNF2L2	SMARCA2
13.2859	13.4503	12.8377	13.1468	12.034	13.3841	tr		848	1257	12.7192	13.3271	-0.607824	A0A1B0GUZ7	A0A1B0GUZ7_HUMAN	Protein EFR3 homolog A	EFR3A	EFR3A
16.0213	16.3441	16.0584	16.3132	15.4274	16.6719	sp		1009	1316	15.8357	16.4431	-0.607397	P49916-2	DNLI3_HUMAN	DNA ligase 3 (EC 6.5.1.1) (DNA ligase III) (Polydeoxyribonucleotide synthase [ATP] 3)	LIG3	LIG3
18.2152	19.8741	19.6419	19.4975	19.5551	19.8603	sp		354	1420	19.1374	19.744	-0.606567	P63096	GNAI1_HUMAN	Guanine nucleotide-binding protein G(i) subunit alpha-1 (Adenylate cyclase-inhibiting G alpha protein)	GNAI1	GNAI1
14.5199	14.6342	13.389	14.9608	14.5217	14.6478	tr		1133	2712	14.1435	14.7476	-0.604098	M0R2B7	M0R2B7_HUMAN	DNA polymerase (EC 2.7.7.7)	POLD1	POLD1
15.9024	15.9416	15.0187	15.9516	15.1191	15.9583	sp		1466	1648	15.3467	15.9505	-0.603752	P02461	CO3A1_HUMAN	Collagen alpha-1(III) chain	COL3A1	COL3A1
17.9268	18.2582	18.051	18.2002	18.0857	19.3985	sp		161	519	18.0211	18.6189	-0.597799	O75947	ATP5H_HUMAN	ATP synthase subunit d, mitochondrial (ATPase subunit d) (ATP synthase peripheral stalk subunit d)	ATP5PD ATP5H My032	ATP5PD
14.0769	14.9576	14.4747	15.2215	15.0548	15.2193	sp		681	1607	14.5354	15.1328	-0.597383	Q99424	ACOX2_HUMAN	Peroxisomal acyl-coenzyme A oxidase 2 (EC 1.17.99.3) (3-alpha,7-alpha,12-alpha-trihydroxy-5-beta-cholestanoyl-CoA 24-hydroxylase) (3-alpha,7-alpha,12-alpha-trihydroxy-5-beta-cholestanoyl-CoA oxidase) (Trihydroxycoprostanoyl-CoA oxidase) (THCA-CoA oxidase) (THCCox)	ACOX2	ACOX2
14.0131	13.829	11.9241	13.9048	13.9033	13.894	sp		296	2266	13.2802	13.8759	-0.595777	P49069	CAMLG_HUMAN	Calcium signal-modulating cyclophilin ligand (CAML)	CAMLG CAML	CAMLG
12.6645	12.8876	10.8046	12.7295	12.8311	12.4698	tr		641	2402	12.1	12.6956	-0.5956	E9PCN2	E9PCN2_HUMAN	Guanylate cyclase soluble subunit beta-1	GUCY1B1	GUCY1B1
15.0572	16.3933	15.6173	15.5568	15.1835	15.6807	sp		286	1618	15.286	15.8769	-0.590939	P52907	CAZA1_HUMAN	F-actin-capping protein subunit alpha-1 (CapZ alpha-1)	CAPZA1	CAPZA1
14.5393	15.0048	14.6222	14.8898	13.9367	14.971	sp		137	2088	14.3661	14.9552	-0.589151	P17568	NDUB7_HUMAN	NADH dehydrogenase [ubiquinone] 1 beta subcomplex subunit 7 (Cell adhesion protein SQM1) (Complex I-B18) (CI-B18) (NADH-ubiquinone oxidoreductase B18 subunit)	NDUFB7	NDUFB7
17.4474	18.0908	17.7949	18.514	17.6813	18.083	tr		1810	258	17.6412	18.2293	-0.588026	G3XAI2	G3XAI2_HUMAN	Laminin subunit beta-1 (Laminin, beta 1, isoform CRA_a)	LAMB1 hCG_17112	LAMB1
12.9698	14.4566	13.246	14.9368	14.3313	12.9137	sp		2230	530	13.5157	14.1023	-0.586657	Q13439	GOGA4_HUMAN	Golgin subfamily A member 4 (256 kDa golgin) (Golgin-245) (Protein 72.1) (Trans-Golgi p230)	GOLGA4	GOLGA4
10.9276	13.5823	13.2463	13.1667	13.2959	12.4664	sp		157	2628	12.4899	13.0718	-0.581845	O95807	TM50A_HUMAN	Transmembrane protein 50A (Small membrane protein 1)	TMEM50A SMP1 UNQ386/PRO718	TMEM50A
16.7885	17.0571	16.8662	17.6143	16.2622	16.9889	sp		278	1921	16.639	17.2201	-0.581133	Q9BTZ2	DHRS4_HUMAN	Dehydrogenase/reductase SDR family member 4 (EC 1.1.1.184) (NADPH-dependent carbonyl reductase/NADP-retinol dehydrogenase) (CR) (PHCR) (NADPH-dependent retinol dehydrogenase/reductase) (NRDR) (humNRDR) (Peroxisomal short-chain alcohol dehydrogenase) (PSCD) (SCAD-SRL) (Short chain dehydrogenase/reductase family 25C member 2) (Short-chain dehydrogenase/reductase family member 4)	DHRS4 SDR25C2 UNQ851/PRO1800	DHRS4
15.7743	16.4127	15.6827	15.5096	15.0059	16.2807	sp		NaN	1764	15.4876	16.0677	-0.580027	Q70UQ0	IKIP_HUMAN
11.4245	14.12	14.1726	14.3305	14.2085	13.0892	sp		869	2507	13.2686	13.8466	-0.57803	P51797	CLCN6_HUMAN	Chloride transport protein 6 (Chloride channel protein 6) (ClC-6)	CLCN6 KIAA0046	CLCN6
10.4379	12.2076	15.4242	15.3314	15.0411	15.0881	sp		125	1897	13.6344	14.209	-0.574635	Q9Y2Q5	LTOR2_HUMAN	Ragulator complex protein LAMTOR2 (Endosomal adaptor protein p14) (Late endosomal/lysosomal Mp1-interacting protein) (Late endosomal/lysosomal adaptor and MAPK and MTOR activator 2) (Mitogen-activated protein-binding protein-interacting protein) (MAPBP-interacting protein) (Roadblock domain-containing protein 3)	LAMTOR2 MAPBPIP ROBLD3 HSPC003	LAMTOR2
15.6007	15.6631	13.1742	15.4623	15.6167	14.9828	sp		919	920	14.7972	15.3694	-0.572181	Q96HY7	DHTK1_HUMAN	Probable 2-oxoglutarate dehydrogenase E1 component DHKTD1, mitochondrial (EC 1.2.4.2) (Dehydrogenase E1 and transketolase domain-containing protein 1)	DHTKD1 KIAA1630	DHTKD1
15.9407	16.3333	15.0944	16.2109	15.9596	16.154	sp		1905	1024	15.6649	16.2327	-0.567806	A3KMH1	VWA8_HUMAN	von Willebrand factor A domain-containing protein 8 (PEX7-binding protein 2) (P7BP2)	VWA8 KIAA0564	VWA8
15.5526	15.7168	14.9029	16.2401	15.5074	15.7004	sp		911	1885	15.321	15.8857	-0.564765	Q9Y2U8	MAN1_HUMAN	Inner nuclear membrane protein Man1 (LEM domain-containing protein 3)	LEMD3 MAN1	LEMD3
15.6442	16.0384	16.073	16.1355	14.9487	16.18	sp		254	2472	15.5553	16.118	-0.562668	Q6Y1H2	HACD2_HUMAN	Very-long-chain (3R)-3-hydroxyacyl-CoA dehydratase 2 (EC 4.2.1.134) (3-hydroxyacyl-CoA dehydratase 2) (HACD2) (Protein-tyrosine phosphatase-like member B)	HACD2 PTPLB	HACD2
14.7314	15.4517	14.698	15.8865	15.9772	15.754	sp		2102	845	15.1356	15.6974	-0.561843	P42356	PI4KA_HUMAN	Phosphatidylinositol 4-kinase alpha (PI4-kinase alpha) (PI4K-alpha) (PtdIns-4-kinase alpha) (EC 2.7.1.67)	PI4KA PIK4 PIK4CA	PI4KA
16.6952	16.6756	16.0181	16.6658	15.3773	16.4212	sp		1118	664	16.0302	16.5875	-0.557354	Q9NZB2	F120A_HUMAN	Constitutive coactivator of PPAR-gamma-like protein 1 (Oxidative stress-associated Src activator) (Protein FAM120A)	FAM120A C9orf10 KIAA0183 OSSA	FAM120A
14.4164	14.2056	14.4359	14.0726	12.0111	14.2558	sp		683	1260	13.6211	14.178	-0.556849	O43395	PRPF3_HUMAN	U4/U6 small nuclear ribonucleoprotein Prp3 (Pre-mRNA-splicing factor 3) (hPrp3) (U4/U6 snRNP 90 kDa protein)	PRPF3 HPRP3 PRP3	PRPF3
15.2494	15.0701	13.3881	15.5185	15.5358	15.2238	sp		668	1799	14.7245	15.2708	-0.546352	O94776	MTA2_HUMAN	Metastasis-associated protein MTA2 (Metastasis-associated 1-like 1) (MTA1-L1 protein) (p53 target protein in deacetylase complex)	MTA2 MTA1L1 PID	MTA2
13.5618	13.8038	11.6863	11.6788	11.018	12.4184	sp		234	1384	12.0887	12.6337	-0.544959	Q14696	MESD_HUMAN	LRP chaperone MESD (LDLR chaperone MESD) (Mesoderm development LRP chaperone MESD) (Mesoderm development candidate 2) (Mesoderm development protein) (Renal carcinoma antigen NY-REN-61)	MESD KIAA0081 MESDC2 MESDM UNQ1911/PRO4369	MESD
17.2345	17.8236	17.5743	17.8418	16.9442	17.7202	sp		246	907	17.251	17.7952	-0.544184	Q04917	1433F_HUMAN	14-3-3 protein eta (Protein AS1)	YWHAH YWHA1	YWHAH
17.0282	16.8497	15.7935	16.8153	16.1414	16.9252	sp		153	2100	16.321	16.8634	-0.542362	Q16540	RM23_HUMAN	39S ribosomal protein L23, mitochondrial (L23mt) (MRP-L23) (L23 mitochondrial-related protein) (Mitochondrial large ribosomal subunit protein uL23m) (Ribosomal protein L23-like)	MRPL23 L23MRP RPL23L	MRPL23
11.9441	15.9409	15.9135	15.9766	15.9237	13.467	sp		264	1407	14.5938	15.1282	-0.534405	P28070	PSB4_HUMAN	Proteasome subunit beta type-4 (EC 3.4.25.1) (26 kDa prosomal protein) (HsBPROS26) (PROS-26) (Macropain beta chain) (Multicatalytic endopeptidase complex beta chain) (Proteasome beta chain) (Proteasome chain 3) (HsN3)	PSMB4 PROS26	PSMB4
13.5564	13.6025	14.4468	14.8227	13.2588	14.4293	sp		734	1035	13.754	14.2848	-0.530831	Q9Y4W2	LAS1L_HUMAN	Ribosomal biogenesis protein LAS1L (Protein LAS1 homolog)	LAS1L MSTP060	LAS1L
14.1697	13.1048	10.1547	11.5135	11.911	13.2086	tr		157	2441	12.0785	12.609	-0.530526	A0A096LPJ4	A0A096LPJ4_HUMAN	Ubiquitin-like protein ISG15	ISG15	ISG15
11.7771	13.5008	13.5529	13.518	13.684	13.5855	sp		735	1507	13.0047	13.5348	-0.530136	Q9UPT5-1	EXOC7_HUMAN	Exocyst complex component 7 (Exocyst complex component Exo70)	EXOC7 EXO70 KIAA1067	EXOC7
15.1787	14.4146	11.6898	14.8133	14.9067	14.134	sp		507	1716	13.9251	14.454	-0.528917	Q6ZVM7	TM1L2_HUMAN	TOM1-like protein 2 (Target of Myb-like protein 2)	TOM1L2	TOM1L2
14.7756	14.6375	14.4959	14.9765	13.9995	15.2378	tr		169	2532	14.4236	14.9506	-0.526968	B5MCD7	B5MCD7_HUMAN	cDNA FLJ52856, highly similar to Synaptogyrin-1	SYNGR1	SYNGR1
16.7273	16.9364	16.802	17.0635	15.9963	17.0966	sp		458	1382	16.5085	17.0322	-0.523643	O43464	HTRA2_HUMAN	Serine protease HTRA2, mitochondrial (EC 3.4.21.108) (High temperature requirement protein A2) (HtrA2) (Omi stress-regulated endoprotease) (Serine protease 25) (Serine proteinase OMI)	HTRA2 OMI PRSS25	HTRA2
16.3208	17.0259	16.357	17.1869	16.8646	16.8965	sp		320	1357	16.5141	17.0364	-0.522316	O75821	EIF3G_HUMAN	Eukaryotic translation initiation factor 3 subunit G (eIF3g) (Eukaryotic translation initiation factor 3 RNA-binding subunit) (eIF-3 RNA-binding subunit) (Eukaryotic translation initiation factor 3 subunit 4) (eIF-3-delta) (eIF3 p42) (eIF3 p44)	EIF3G EIF3S4	EIF3G
13.4691	13.904	13.1272	13.5864	13.1074	13.7669	sp		1508	1803	13.2346	13.7524	-0.517873	Q8TEQ6	GEMI5_HUMAN	Gem-associated protein 5 (Gemin5)	GEMIN5	GEMIN5
14.2614	14.3407	13.077	13.4118	13.2639	14.4009	sp		226	2694	13.5341	14.0511	-0.517059	Q96LL9	DJC30_HUMAN	DnaJ homolog subfamily C member 30, mitochondrial (Williams-Beuren syndrome chromosomal region 18 protein)	DNAJC30 WBSCR18	DNAJC30
12.2057	13.8785	14.3013	13.9413	13.9207	14.1562	sp		210	2409	13.4759	13.992	-0.516078	Q16595	FRDA_HUMAN	Frataxin, mitochondrial (EC 1.16.3.1) (Friedreich ataxia protein) (Fxn) [Cleaved into: Frataxin intermediate form (i-FXN);Frataxin(56-210) (m56-FXN);Frataxin(78-210) (d-FXN) (m78-FXN);Frataxin mature form (Frataxin(81-210)) (m81-FXN)]	FXN FRDA X25	FXN
17.8863	18.4743	17.5669	18.2027	17.8848	18.1959	sp		589	1896	17.7793	18.291	-0.511629	Q9HD45	TM9S3_HUMAN	Transmembrane 9 superfamily member 3 (EP70-P-iso) (SM-11044-binding protein)	TM9SF3 SMBP UNQ245/PRO282	TM9SF3
15.0982	16.0231	15.2693	16.0241	15.4454	15.2981	sp		470	1555	15.271	15.7818	-0.510777	Q96TC7	RMD3_HUMAN	Regulator of microtubule dynamics protein 3 (RMD-3) (hRMD-3) (Cerebral protein 10) (Protein FAM82A2) (Protein FAM82C) (Protein tyrosine phosphatase-interacting protein 51) (TCPTP-interacting protein 51)	RMDN3 FAM82A2 FAM82C PTPIP51 hucep-10 UNQ3122/PRO10274	RMDN3
12.2474	12.9166	12.8389	13.548	13.5302	13.6839	tr		173	2318	12.8722	13.3828	-0.510668	E9PGT6	E9PGT6_HUMAN	COP9 signalosome complex subunit 8	COPS8	COPS8
14.1727	15.1258	14.7552	15.1312	14.5969	14.7976	tr		2017	558	14.5083	15.0182	-0.509921	J3KN16	J3KN16_HUMAN	Proteasome adapter and scaffold protein ECM29	ECPAS	ECPAS
16.819	15.8466	15.6968	15.9593	13.5361	15.7727	sp		415	2138	15.3507	15.8595	-0.508869	Q15018	ABRX2_HUMAN	BRISC complex subunit Abraxas 2 (Abraxas brother protein 1) (Protein FAM175B)	ABRAXAS2 ABRO1 FAM175B KIAA0157	ABRAXAS2
14.9136	15.3146	13.915	14.8976	15.0159	15.1515	tr		1224	2019	14.6148	15.1212	-0.506372	Q5T1Z8	Q5T1Z8_HUMAN	Pumilio homolog 1 (Pumilio homolog 1 (Drosophila), isoform CRA_c)	PUM1 hCG_19946	PUM1
14.1883	14.8391	14.3127	14.3848	13.8386	14.634	sp		293	1497	14.1132	14.6193	-0.506074	Q8IZ81	ELMD2_HUMAN	ELMO domain-containing protein 2	ELMOD2	ELMOD2
15.9137	15.83	14.6683	15.8283	15.6625	16.1009	sp		928	1180	15.4148	15.9197	-0.504877	Q9BZQ8	NIBAN_HUMAN	Protein Niban 1 (Cell growth-inhibiting gene 39 protein) (Protein FAM129A)	NIBAN1 C1orf24 FAM129A NIBAN GIG39	NIBAN1
17.7942	18.4155	17.7899	18.615	18.5816	18.6493	sp		244	1083	18.0552	18.5599	-0.504709	Q9Y224	RTRAF_HUMAN	RNA transcription, translation and transport factor protein (CLE7 homolog) (CLE) (hCLE)	RTRAF C14orf166 CGI-99	RTRAF
15.2943	15.1486	14.8053	15.2756	15.909	17.09	sp		411	2199	15.3362	15.8381	-0.501887	P17050	NAGAB_HUMAN	Alpha-N-acetylgalactosaminidase (EC 3.2.1.49) (Alpha-galactosidase B)	NAGA	NAGA
15.7966	15.1189	13.8328	15.0471	14.0171	14.9671	sp		225	2361	14.5488	15.0444	-0.495572	Q13637	RAB32_HUMAN	Ras-related protein Rab-32	RAB32	RAB32
16.1925	17.0833	16.7988	17.1128	16.8233	17.1029	sp		215	838	16.6049	17.0996	-0.494776	P61106	RAB14_HUMAN	Ras-related protein Rab-14	RAB14	RAB14
13.5006	16.1829	16.7909	16.377	16.9718	16.1846	sp		275	1636	15.7544	16.2481	-0.49372	Q9UBW8	CSN7A_HUMAN	COP9 signalosome complex subunit 7a (SGN7a) (Signalosome subunit 7a) (Dermal papilla-derived protein 10) (JAB1-containing signalosome subunit 7a)	COPS7A CSN7A DERP10	COPS7A
12.9461	14.5996	14.6886	14.5713	14.8254	14.7599	tr		1132	1679	14.1534	14.6436	-0.490229	A0A0G2JK23	A0A0G2JK23_HUMAN	Large proline-rich protein BAG6	BAG6	BAG6
16.7293	17.9793	17.776	17.826	17.7617	17.9251	sp		2243	175	17.4224	17.9101	-0.48778	O75165	DJC13_HUMAN	DnaJ homolog subfamily C member 13 (Required for receptor-mediated endocytosis 8) (RME-8)	DNAJC13 KIAA0678 RME8	DNAJC13
12.9619	14.5983	14.6459	14.4364	14.2023	14.2318	sp		399	2154	13.9367	14.4222	-0.485445	Q5JVF3	PCID2_HUMAN	PCI domain-containing protein 2 (CSN12-like protein)	PCID2 HT004	PCID2
15.1717	14.998	14.9657	15.1196	13.4598	14.9314	sp		1341	2111	14.5324	15.0163	-0.483932	Q9UKV3-5	ACINU_HUMAN	Apoptotic chromatin condensation inducer in the nucleus (Acinus)	ACIN1 ACINUS KIAA0670	ACIN1
16.3678	16.7067	15.8886	16.6167	16.1444	16.5239	sp		189	1875	16.1336	16.6158	-0.48217	Q9NRV9	HEBP1_HUMAN	Heme-binding protein 1 (p22HBP)	HEBP1 HBP	HEBP1
14.9065	15.7104	15.1215	15.223	15.1928	15.7259	sp		282	1476	15.0736	15.5531	-0.479507	Q07021	C1QBP_HUMAN	Complement component 1 Q subcomponent-binding protein, mitochondrial (ASF/SF2-associated protein p32) (Glycoprotein gC1qBP) (C1qBP) (Hyaluronan-binding protein 1) (Mitochondrial matrix protein p32) (gC1q-R protein) (p33) (SF2AP32)	C1QBP GC1QBP HABP1 SF2P32	C1QBP
18.6866	18.8266	18.4686	18.8322	17.8106	18.7383	sp		664	192	18.3219	18.799	-0.477093	P02545	LMNA_HUMAN	Prelamin-A/C [Cleaved into: Lamin-A/C (70 kDa lamin) (Renal carcinoma antigen NY-REN-32)]	LMNA LMN1	LMNA
12.5414	9.59736	12.7012	14.5332	11.8333	14.3722	sp		757	1963	12.3586	12.8343	-0.475629	Q96J84	KIRR1_HUMAN	Kin of IRRE-like protein 1 (Kin of irregular chiasm-like protein 1) (Nephrin-like protein 1)	KIRREL1 KIRREL NEPH1	KIRREL1
13.2305	14.2744	12.6644	14.3173	13.4544	12.1843	sp		472	2568	13.1164	13.592	-0.47555	Q9Y646	CBPQ_HUMAN	Carboxypeptidase Q (EC 3.4.17.-) (Lysosomal dipeptidase) (Plasma glutamate carboxypeptidase)	CPQ LCH1 PGCP	CPQ
16.0142	16.523	16.564	16.8972	16.0791	16.6598	sp		339	1879	16.2191	16.6933	-0.474209	Q13825	AUHM_HUMAN	Methylglutaconyl-CoA hydratase, mitochondrial (EC 4.2.1.18) (AU-specific RNA-binding enoyl-CoA hydratase) (AU-binding protein/enoyl-CoA hydratase) (Itaconyl-CoA hydratase) (EC 4.2.1.56)	AUH	AUH
12.569	13.4003	11.8392	11.7141	12.7264	13.4402	sp		1500	2608	12.3782	12.8516	-0.473333	P31327	CPSM_HUMAN	Carbamoyl-phosphate synthase [ammonia], mitochondrial (EC 6.3.4.16) (Carbamoyl-phosphate synthetase I) (CPSase I)	CPS1	CPS1
13.4247	11.4137	11.8731	12.1927	9.93505	13.0419	sp		620	2415	11.7443	12.2161	-0.471831	Q53F19	NCBP3_HUMAN	Nuclear cap-binding protein subunit 3 (Protein ELG)	NCBP3 C17orf85	NCBP3
13.1321	13.5517	13.6636	15.1533	12.4606	11.9485	sp		444	2354	13.0854	13.5512	-0.465738	O60427	FADS1_HUMAN	Acyl-CoA (8-3)-desaturase (EC 1.14.19.44) (Delta(5) fatty acid desaturase) (D5D) (Delta(5) desaturase) (Delta-5 desaturase) (Fatty acid desaturase 1)	FADS1 FADSD5	FADS1
14.1512	15.0627	14.9573	15.1568	14.7778	15.0545	sp		257	2513	14.6288	15.0913	-0.462528	Q969M3	YIPF5_HUMAN	Protein YIPF5 (Five-pass transmembrane protein localizing in the Golgi apparatus and the endoplasmic reticulum 5) (Smooth muscle cell-associated protein 5) (SMAP-5) (YIP1 family member 5) (YPT-interacting protein 1 A)	YIPF5 FINGER5 YIP1A PP12723 SB140 UNQ3123/PRO10275	YIPF5
16.1437	17.3111	17.0605	17.3379	17.0995	17.0416	sp		461	537	16.7679	17.2302	-0.462288	Q02818	NUCB1_HUMAN	Nucleobindin-1 (CALNUC)	NUCB1 NUC	NUCB1
14.2263	14.2787	14.2724	14.8864	14.3197	15.0315	sp		317	1051	14.2728	14.7322	-0.459365	P02649	APOE_HUMAN	Apolipoprotein E (Apo-E)	APOE	APOE
15.5619	15.1034	15.5245	14.8658	12.2921	14.787	tr		194	2660	14.4595	14.9187	-0.459249	H0YFT9	H0YFT9_HUMAN	Ubiquitin carboxyl-terminal hydrolase 28 (Fragment)	USP28	USP28
15.6013	15.7628	15.2647	15.7937	15.1936	15.8794	sp		332	1895	15.3532	15.812	-0.458807	Q06136	KDSR_HUMAN	3-ketodihydrosphingosine reductase (KDS reductase) (EC 1.1.1.102) (3-dehydrosphinganine reductase) (Follicular variant translocation protein 1) (FVT-1) (Short chain dehydrogenase/reductase family 35C member 1)	KDSR FVT1 SDR35C1	KDSR
14.6651	14.1007	14.2704	14.296	12.1272	14.0314	tr		379	2276	13.6876	14.1427	-0.455125	J3KPT4	J3KPT4_HUMAN	TraB domain-containing protein	TRABD	TRABD
15.6087	16.2566	15.5696	16.0838	15.9612	16.1608	tr		2162	1047	15.7131	16.1671	-0.453926	F8VPD4	F8VPD4_HUMAN	CAD protein	CAD	CAD
17.2891	17.9468	17.8311	18.1796	17.8998	18.2467	tr		736	393	17.6733	18.1244	-0.451073	F5H365	F5H365_HUMAN	Protein transport protein SEC23	SEC23A	SEC23A
15.0765	14.6822	15.1761	14.8861	13.0442	15.0747	sp		521	2145	14.4322	14.881	-0.448752	Q8N465	D2HDH_HUMAN	D-2-hydroxyglutarate dehydrogenase, mitochondrial (EC 1.1.99.-)	D2HGDH D2HGD	D2HGDH
17.7046	18.5155	17.9722	18.5433	17.7849	17.7435	sp		99	1862	17.8206	18.2674	-0.446852	O43678	NDUA2_HUMAN	NADH dehydrogenase [ubiquinone] 1 alpha subcomplex subunit 2 (Complex I-B8) (CI-B8) (NADH-ubiquinone oxidoreductase B8 subunit)	NDUFA2	NDUFA2
18.5027	18.3974	18.5716	19.2688	18.5224	19.2702	cont		NaN	2596	18.5322	18.9788	-0.446554	51	sp
14.9064	15.5087	15.661	15.856	14.9847	15.5251	sp		1019	1925	15.184	15.6299	-0.445889	P14735	IDE_HUMAN	Insulin-degrading enzyme (EC 3.4.24.56) (Abeta-degrading protease) (Insulin protease) (Insulinase) (Insulysin)	IDE	IDE
15.1101	15.6263	14.9186	15.5776	15.1911	15.3478	sp		326	2072	15.0733	15.5172	-0.443946	Q8NFH5	NUP35_HUMAN	Nucleoporin NUP35 (35 kDa nucleoporin) (Mitotic phosphoprotein 44) (MP-44) (Nuclear pore complex protein Nup53) (Nucleoporin NUP53)	NUP35 MP44 NUP53	NUP35
15.9776	16.8687	16.0483	16.838	16.9182	16.5692	sp		474	871	16.3147	16.7586	-0.443932	Q9ULV4	COR1C_HUMAN	Coronin-1C (Coronin-3) (hCRNN4)	CORO1C CRN2 CRNN4	CORO1C
15.8134	16.4558	16.2928	16.2838	15.8421	16.5405	sp		879	805	15.9828	16.4267	-0.443921	Q8NCN5	PDPR_HUMAN	Pyruvate dehydrogenase phosphatase regulatory subunit, mitochondrial (PDPr)	PDPR KIAA1990	PDPR
15.1929	15.4149	14.8683	15.5841	15.0166	15.408	sp		646	1299	15.0259	15.469	-0.443121	Q6PCB7	S27A1_HUMAN	Long-chain fatty acid transport protein 1 (FATP-1) (Fatty acid transport protein 1) (EC 6.2.1.-) (Solute carrier family 27 member 1)	SLC27A1 ACSVL5 FATP1	SLC27A1
16.4808	16.7134	15.8529	16.8203	16.6639	16.7798	sp		184	1691	16.3325	16.7712	-0.438639	Q9BU61	NDUF3_HUMAN	NADH dehydrogenase [ubiquinone] 1 alpha subcomplex assembly factor 3	NDUFAF3 C3orf60	NDUFAF3
14.4614	13.3555	11.8109	14.4301	14.5597	14.3386	tr		280	1890	13.6107	14.0414	-0.430729	A0A087WY55	A0A087WY55_HUMAN	Chromosome 6 open reading frame 55, isoform CRA_b (Vacuolar protein sorting-associated protein VTA1 homolog)	VTA1 C6orf55 hCG_18120	VTA1
15.1426	15.7751	15.3435	15.8154	15.4135	15.6002	tr		584	2165	15.2999	15.7302	-0.430354	F6S8M0	F6S8M0_HUMAN	N-acetylglucosamine-6-sulfatase	GNS	GNS
11.5131	13.3563	12.7886	11.0992	12.2348	13.3719	sp		675	2450	12.1788	12.6091	-0.430328	O43301	HS12A_HUMAN	Heat shock 70 kDa protein 12A	HSPA12A KIAA0417	HSPA12A
13.5708	14.5375	15.6013	14.7881	14.0892	15.2258	sp		205	2133	14.4204	14.8504	-0.430012	Q9Y5Z4	HEBP2_HUMAN	Heme-binding protein 2 (Placental protein 23) (PP23) (Protein SOUL)	HEBP2 C6orf34 SOUL	HEBP2
14.6578	14.5895	14.7787	14.6364	9.7384	11.2357	sp		130	2661	13.0583	13.4872	-0.428911	Q8IUE6	H2A2B_HUMAN	Histone H2A type 2-B	HIST2H2AB	HIST2H2AB
18.0697	18.0602	17.2046	17.8572	17.3961	18.0371	sp		207	1187	17.5568	17.9849	-0.428032	P30405	PPIF_HUMAN	Peptidyl-prolyl cis-trans isomerase F, mitochondrial (PPIase F) (EC 5.2.1.8) (Cyclophilin D) (CyP-D) (CypD) (Cyclophilin F) (Mitochondrial cyclophilin) (CyP-M) (Rotamase F)	PPIF CYP3	PPIF
17.0942	17.1757	15.9906	17.1943	16.9725	16.9705	sp		297	1702	16.6858	17.1135	-0.427736	Q9BSH4	TACO1_HUMAN	Translational activator of cytochrome c oxidase 1 (Coiled-coil domain-containing protein 44) (Translational activator of mitochondrially-encoded cytochrome c oxidase I)	TACO1 CCDC44 PRO0477	TACO1
14.2074	14.8984	14.1731	14.6661	14.9512	15.0495	sp		102	2399	14.4439	14.8713	-0.427389	Q9Y6A9	SPCS1_HUMAN	Signal peptidase complex subunit 1 (EC 3.4.-.-) (Microsomal signal peptidase 12 kDa subunit) (SPase 12 kDa subunit)	SPCS1 SPC12 HSPC033	SPCS1
15.5295	16.8587	16.8465	16.8946	16.9019	16.8042	sp		91	1904	16.426	16.8525	-0.426525	P07919	QCR6_HUMAN	Cytochrome b-c1 complex subunit 6, mitochondrial (Complex III subunit 6) (Complex III subunit VIII) (Cytochrome c1 non-heme 11 kDa protein) (Mitochondrial hinge protein) (Ubiquinol-cytochrome c reductase complex 11 kDa protein)	UQCRH	UQCRH
11.2085	11.375	11.8082	10.4168	8.9796	11.4817	sp		538	2389	10.6654	11.0912	-0.42573	Q9H0W5	CCDC8_HUMAN	Coiled-coil domain-containing protein 8	CCDC8	CCDC8
13.7923	12.3136	13.3753	14.473	12.6202	14.2731	tr		685	1755	13.2626	13.6866	-0.423984	A0A0B4J1R2	A0A0B4J1R2_HUMAN	Acyl-CoA synthetase short-chain family member 3, mitochondrial (FLJ21963 protein, isoform CRA_b)	ACSS3 FLJ21963 hCG_23730	ACSS3
15.4393	15.9756	14.8631	15.1506	14.6964	15.1424	sp		630	1119	14.9996	15.4229	-0.423286	Q14258	TRI25_HUMAN	E3 ubiquitin/ISG15 ligase TRIM25 (EC 6.3.2.n3) (Estrogen-responsive finger protein) (RING finger protein 147) (RING-type E3 ubiquitin transferase) (EC 2.3.2.27) (RING-type E3 ubiquitin transferase TRIM25) (Tripartite motif-containing protein 25) (Ubiquitin/ISG15-conjugating enzyme TRIM25) (Zinc finger protein 147)	TRIM25 EFP RNF147 ZNF147	TRIM25
14.6802	14.4662	12.745	14.4563	14.7946	14.5672	sp		547	1531	14.0733	14.4966	-0.423263	Q9H9T3-2	ELP3_HUMAN	Elongator complex protein 3 (hELP3) (Protein lysine acetyltransferase ELP3) (EC 2.3.1.-) (tRNA uridine(34) acetyltransferase) (EC 2.3.1.-)	ELP3	ELP3
14.1629	14.917	14.4327	14.9223	14.4538	14.4743	sp		419	1328	14.3498	14.7712	-0.421436	O75600	KBL_HUMAN	2-amino-3-ketobutyrate coenzyme A ligase, mitochondrial (AKB ligase) (EC 2.3.1.29) (Aminoacetone synthase) (Glycine acetyltransferase)	GCAT KBL	GCAT
15.4932	15.8086	15.378	15.7871	14.9565	15.4913	sp		3259	98	15.2759	15.6957	-0.419776	Q14789	GOGB1_HUMAN	Golgin subfamily B member 1 (372 kDa Golgi complex-associated protein) (GCP372) (Giantin) (Macrogolgin)	GOLGB1	GOLGB1
14.8276	16.7299	17.0216	16.6065	16.9866	16.7402	sp		1835	2344	16.2786	16.6922	-0.413591	Q68CP9	ARID2_HUMAN	AT-rich interactive domain-containing protein 2 (ARID domain-containing protein 2) (BRG1-associated factor 200) (BAF200) (Zinc finger protein with activation potential) (Zipzap/p200)	ARID2 BAF200 KIAA1557	ARID2
12.7182	11.7842	13.0729	13.8529	12.9482	14.3367	tr		817	2084	12.9131	13.3246	-0.411496	D3DTX6	D3DTX6_HUMAN	Neurabin-2 (Neurabin-II) (Protein phosphatase 1 regulatory subunit 9B) (Spinophilin)	PPP1R9B PPP1R6	PPP1R9B
17.8322	18.5788	18.1443	18.2987	18.2055	18.5365	sp		462	287	18.0607	18.4713	-0.410666	P68104	EF1A1_HUMAN	Elongation factor 1-alpha 1 (EF-1-alpha-1) (Elongation factor Tu) (EF-Tu) (Eukaryotic elongation factor 1 A-1) (eEF1A-1) (Leukocyte receptor cluster member 7)	EEF1A1 EEF1A EF1A LENG7	EEF1A1
16.0483	16.0199	14.6093	16.0483	16.0989	15.9185	sp		677	1085	15.5855	15.9956	-0.410074	P16278	BGAL_HUMAN	Beta-galactosidase (EC 3.2.1.23) (Acid beta-galactosidase) (Lactase) (Elastin receptor 1)	GLB1 ELNR1	GLB1
11.7145	16.2523	16.4259	16.3279	16.4801	13.2697	tr		300	1837	14.8735	15.2833	-0.409785	K7ES61	K7ES61_HUMAN	39S ribosomal protein L4, mitochondrial (Fragment)	MRPL4	MRPL4
17.2738	17.5882	17.0557	17.6142	17.3326	17.685	sp		319	650	17.2207	17.6291	-0.408394	P09525	ANXA4_HUMAN	Annexin A4 (35-beta calcimedin) (Annexin IV) (Annexin-4) (Carbohydrate-binding protein p33/p41) (Chromobindin-4) (Endonexin I) (Lipocortin IV) (P32.5) (PP4-X) (Placental anticoagulant protein II) (PAP-II) (Protein II)	ANXA4 ANX4	ANXA4
13.0854	13.0434	12.3894	13.7146	13.1184	13.0555	sp		567	2695	12.8644	13.2712	-0.406767	Q6NXT6	TAPT1_HUMAN	Transmembrane anterior posterior transformation protein 1 homolog (Cytomegalovirus partial fusion receptor)	TAPT1 CMVFR	TAPT1
13.2999	14.0399	13.6628	13.4508	13.0465	13.7345	sp		385	1948	13.3364	13.7418	-0.405357	Q9BRX2	PELO_HUMAN	Protein pelota homolog (EC 3.1.-.-)	PELO CGI-17	PELO
16.0154	15.9823	14.7238	16.0458	16.0398	15.9443	tr		371	1605	15.593	15.9908	-0.397806	K7EP32	K7EP32_HUMAN	UBX domain-containing protein 6 (Fragment)	UBXN6	UBXN6
14.7696	15.0135	14.1427	14.1297	14.8122	15.7738	sp		3753	541	14.5749	14.9723	-0.397477	Q709C8	VP13C_HUMAN	Vacuolar protein sorting-associated protein 13C	VPS13C KIAA1421	VPS13C
13.9921	14.5265	13.9038	14.1507	13.9477	14.3565	sp		151	2624	13.9479	14.3446	-0.396717	Q9Y6H1	CHCH2_HUMAN	Coiled-coil-helix-coiled-coil-helix domain-containing protein 2 (Aging-associated gene 10 protein) (HCV NS2 trans-regulated protein) (NS2TP)	CHCHD2 C7orf17 AAG10	CHCHD2
12.6572	15.0673	15.2252	13.9264	15.054	15.132	sp		713	2164	14.3121	14.7086	-0.396444	Q99797	MIPEP_HUMAN	Mitochondrial intermediate peptidase (MIP) (EC 3.4.24.59)	MIPEP MIP	MIPEP
16.4853	16.8975	16.5111	16.7075	16.2734	16.8498	tr		185	1526	16.4233	16.8183	-0.394978	A8K878	A8K878_HUMAN	Mesencephalic astrocyte-derived neurotrophic factor (cDNA FLJ77177, highly similar to Homo sapiens arginine-rich, mutated in early stage tumors (ARMET), mRNA)	MANF	MANF
17.6708	18.0835	17.9041	18.1868	17.9498	18.4375	sp		1063	137	17.8416	18.2359	-0.394382	O00159	MYO1C_HUMAN	Unconventional myosin-Ic (Myosin I beta) (MMI-beta) (MMIb)	MYO1C	MYO1C
15.1662	15.7814	15.4727	15.7806	15.6406	15.8942	sp		441	1453	15.4265	15.8188	-0.392241	Q7L592	NDUF7_HUMAN	Protein arginine methyltransferase NDUFAF7, mitochondrial (EC 2.1.1.320) (NADH dehydrogenase [ubiquinone] complex I, assembly factor 7) (Protein midA homolog)	NDUFAF7 C2orf56 PRO1853	NDUFAF7
13.7964	14.2236	13.9399	14.263	13.9934	14.4183	sp		1278	2023	13.9099	14.3016	-0.391717	O15118	NPC1_HUMAN	NPC intracellular cholesterol transporter 1 (Niemann-Pick C1 protein)	NPC1	NPC1
16.1401	16.4921	16.2884	16.5689	15.9217	16.4594	sp		284	78	16.1167	16.5068	-0.390072	P09493	TPM1_HUMAN	Tropomyosin alpha-1 chain (Alpha-tropomyosin) (Tropomyosin-1)	TPM1 C15orf13 TMSA	TPM1
13.8349	13.9723	14.1121	15.0846	13.9877	14.0447	sp		318	1777	13.9782	14.3672	-0.388969	Q96QD9	UIF_HUMAN	UAP56-interacting factor (Forty-two-three domain-containing protein 1) (Protein 40-2-3)	FYTTD1 UIF	FYTTD1
15.6425	16.4194	16.3261	16.4327	15.957	16.2346	sp		227	2135	15.9752	16.3622	-0.387008	Q13445	TMED1_HUMAN	Transmembrane emp24 domain-containing protein 1 (Interleukin-1 receptor-like 1 ligand) (Putative T1/ST2 receptor-binding protein) (p24 family protein gamma-1) (Tp24) (p24gamma1)	TMED1 IL1RL1L IL1RL1LG	TMED1
12.7793	12.4269	12.7645	11.4224	9.58135	12.4352	sp		421	2574	11.7084	12.0948	-0.386454	Q9UGI8	TES_HUMAN	Testin (TESS)	TES	TES
17.6234	19.455	17.7041	17.309	17.6606	17.3751	sp		324	1684	17.6627	18.0464	-0.383667	P52952	NKX25_HUMAN	Homeobox protein Nkx-2.5 (Cardiac-specific homeobox) (Homeobox protein CSX) (Homeobox protein NK-2 homolog E)	NKX2-5 CSX NKX2.5 NKX2E	NKX2-5
13.774	14.6474	14.4622	14.6077	14.5262	14.6565	tr		339	2588	14.2541	14.6372	-0.383072	A0A087X0K1	A0A087X0K1_HUMAN	Calcium-binding protein 39	CAB39	CAB39
11.8722	11.6263	11.2961	12.9004	12.8863	12.677	sp		544	2443	12.0182	12.4012	-0.38306	Q96D53	COQ8B_HUMAN	Atypical kinase COQ8B, mitochondrial (EC 2.7.-.-) (AarF domain-containing protein kinase 4) (Coenzyme Q protein 8B)	COQ8B ADCK4	COQ8B
13.1068	13.5892	13.8904	14.2963	13.5854	13.8452	tr		470	2098	13.5275	13.9102	-0.382678	E9PHG5	E9PHG5_HUMAN	Cytochrome P450 20A1	CYP20A1	CYP20A1
16.0586	16.2194	16.1152	15.9985	14.8606	15.9614	sp		1204	553	15.6781	16.0598	-0.381619	Q9HD20	AT131_HUMAN	Manganese-transporting ATPase 13A1 (EC 3.6.3.-)	ATP13A1 ATP13A KIAA1825 CGI-152	ATP13A1
12.9534	12.0807	14.0018	13.9759	12.0026	14.0327	sp		250	1772	12.986	13.3631	-0.377164	Q96EY8	MMAB_HUMAN	Corrinoid adenosyltransferase (EC 2.5.1.17) (Cob(II)alamin adenosyltransferase) (Cob(II)yrinic acid a,c-diamide adenosyltransferase) (Cobinamide/cobalamin adenosyltransferase) (Methylmalonic aciduria type B protein)	MMAB	MMAB
15.1559	14.3842	13.8842	15.139	14.5899	15.2366	sp		1465	1314	14.5433	14.9199	-0.376614	P54296	MYOM2_HUMAN	Myomesin-2 (165 kDa connectin-associated protein) (165 kDa titin-associated protein) (M-protein) (Myomesin family member 2)	MYOM2	MYOM2
13.4493	13.9584	13.84	13.2243	12.4312	13.6673	tr		642	2606	13.2402	13.6167	-0.376509	A0A286YFD0	A0A286YFD0_HUMAN	Methylenetetrahydrofolate reductase (EC 1.5.1.20)	MTHFR	MTHFR
15.151	16.2071	16.0961	16.0652	15.8248	15.9281	sp		235	1245	15.6906	16.0668	-0.376142	Q9BVK6	TMED9_HUMAN	Transmembrane emp24 domain-containing protein 9 (GMP25) (Glycoprotein 25L2) (p24 family protein alpha-2) (p24alpha2) (p25)	TMED9 GP25L2	TMED9
17.1524	17.4807	16.7558	17.2954	17.0253	17.2775	sp		297	1288	16.9778	17.3512	-0.373373	Q16762	THTR_HUMAN	Thiosulfate sulfurtransferase (EC 2.8.1.1) (Rhodanese)	TST	TST
16.4531	16.9378	16.2062	16.9405	17.321	17.2187	sp		1249	237	16.6601	17.0324	-0.372269	P29144	TPP2_HUMAN	Tripeptidyl-peptidase 2 (TPP-2) (EC 3.4.14.10) (Tripeptidyl aminopeptidase) (Tripeptidyl-peptidase II) (TPP-II)	TPP2	TPP2
15.6166	16.527	15.2935	16.8471	15.8898	14.5395	sp		649	1044	15.6	15.9712	-0.371202	P46063	RECQ1_HUMAN	ATP-dependent DNA helicase Q1 (EC 3.6.4.12) (DNA helicase, RecQ-like type 1) (RecQ1) (DNA-dependent ATPase Q1) (RecQ protein-like 1)	RECQL RECQ1 RECQL1	RECQL
13.9809	14.2597	13.4123	14.2538	14.3372	14.3296	sp		1505	576	13.9101	14.281	-0.370889	P39880-3	CUX1_HUMAN	Homeobox protein cut-like 1 (CCAAT displacement protein) (CDP) (Homeobox protein cux-1)	CUX1 CUTL1	CUX1
13.2396	13.7127	13.2676	13.7848	13.68	13.7998	tr		326	2651	13.3958	13.7658	-0.370026	A0A0J9YWM3	A0A0J9YWM3_HUMAN	Solute carrier family 22 member 18	SLC22A18	SLC22A18
14.5306	14.9373	14.6908	15.1536	14.8309	15.0705	sp		522	1306	14.6841	15.0538	-0.369734	P37198	NUP62_HUMAN	Nuclear pore glycoprotein p62 (62 kDa nucleoporin) (Nucleoporin Nup62)	NUP62	NUP62
15.3708	15.1323	13.6647	15.2549	15.3234	15.0799	sp		369	2063	14.7863	15.1557	-0.369418	Q9NZJ6	COQ3_HUMAN	Ubiquinone biosynthesis O-methyltransferase, mitochondrial (3-demethylubiquinol 3-O-methyltransferase) (EC 2.1.1.64) (Polyprenyldihydroxybenzoate methyltransferase) (EC 2.1.1.114)	COQ3 UG0215E05	COQ3
16.5114	16.7677	16.2477	16.7911	16.4651	16.7733	sp		149	2429	16.4081	16.7773	-0.369291	Q9NRP0	OSTC_HUMAN	Oligosaccharyltransferase complex subunit OSTC (Hydrophobic protein HSF-28)	OSTC DC2 HDCMD45P HSPC307	OSTC
17.1657	17.5913	17.3893	17.478	17.171	17.7581	sp		663	1283	17.242	17.6091	-0.367115	Q99805	TM9S2_HUMAN	Transmembrane 9 superfamily member 2 (p76)	TM9SF2	TM9SF2
19.1625	19.1275	19.221	19.7639	19.2375	19.8268	sp		828	191	19.207	19.5727	-0.365711	Q14BN4	SLMAP_HUMAN	Sarcolemmal membrane-associated protein (Sarcolemmal-associated protein)	SLMAP KIAA1601 SLAP UNQ1847/PRO3577	SLMAP
14.5778	15.1032	14.9849	15.1053	14.5404	14.9878	sp		504	1860	14.701	15.0654	-0.364379	P61011	SRP54_HUMAN	Signal recognition particle 54 kDa protein (SRP54)	SRP54	SRP54
14.6757	15.1191	15.2926	15.2367	14.4375	15.1429	sp		3174	591	14.8019	15.1662	-0.364299	Q96RL7	VP13A_HUMAN	Vacuolar protein sorting-associated protein 13A (Chorea-acanthocytosis protein) (Chorein)	VPS13A CHAC KIAA0986	VPS13A
13.6416	14.6433	14.8026	14.5705	14.6212	14.938	sp		337	2219	14.3551	14.7173	-0.362137	Q9ULX7	CAH14_HUMAN	Carbonic anhydrase 14 (EC 4.2.1.1) (Carbonate dehydratase XIV) (Carbonic anhydrase XIV) (CA-XIV)	CA14 UNQ690/PRO1335	CA14
16.509	17.203	16.9598	17.2277	16.2006	16.3252	tr		1009	851	16.5565	16.9186	-0.362122	B1AKY9	B1AKY9_HUMAN	Sodium/potassium-transporting ATPase subunit alpha	ATP1A2	ATP1A2
14.239	15.3734	14.0919	14.5151	15.0964	14.6215	sp		3224	320	14.4758	14.8367	-0.360917	P49792	RBP2_HUMAN	E3 SUMO-protein ligase RanBP2 (EC 2.3.2.-) (358 kDa nucleoporin) (Nuclear pore complex protein Nup358) (Nucleoporin Nup358) (Ran-binding protein 2) (RanBP2) (p270)	RANBP2 NUP358	RANBP2
16.6186	17.0894	16.6355	16.9932	16.8991	17.1519	sp		5795	103	16.7177	17.0782	-0.360464	Q8IVF2	AHNK2_HUMAN	Protein AHNAK2	AHNAK2 C14orf78 KIAA2019	AHNAK2
14.5445	14.7414	13.189	14.5682	14.1601	13.657	tr		827	1838	13.9645	14.3222	-0.35766	H7BXH2	H7BXH2_HUMAN	Serine/threonine-protein phosphatase 6 regulatory subunit 3	PPP6R3	PPP6R3
14.2134	14.6393	14.5433	14.6961	14.4016	14.8932	sp		540	1218	14.3861	14.7429	-0.356787	Q9NZW5	MPP6_HUMAN	MAGUK p55 subfamily member 6 (Veli-associated MAGUK 1) (VAM-1)	MPP6 VAM1	MPP6
15.7178	15.8548	14.6888	14.8336	14.7119	15.4842	sp		270	1763	15.0395	15.3909	-0.351381	P15927-2	RFA2_HUMAN	Replication protein A 32 kDa subunit (RP-A p32) (Replication factor A protein 2) (RF-A protein 2) (Replication protein A 34 kDa subunit) (RP-A p34)	RPA2 REPA2 RPA32 RPA34	RPA2
15.6228	15.8075	15.4806	15.741	15.2055	15.8121	sp		447	912	15.4363	15.7869	-0.35059	Q9Y4P3	TBL2_HUMAN	Transducin beta-like protein 2 (WS beta-transducin repeats protein) (WS-betaTRP) (Williams-Beuren syndrome chromosomal region 13 protein)	TBL2 WBSCR13 UNQ563/PRO1125	TBL2
16.4253	16.6223	16.1004	16.6952	16.4922	16.7498	sp		956	761	16.3393	16.6891	-0.349779	O00339-2	MATN2_HUMAN	Matrilin-2	MATN2 UNQ193/PRO219	MATN2
12.4395	12.9663	12.719	12.7748	12.3182	12.7798	sp		258	2575	12.4922	12.8403	-0.348066	Q96K19	RN170_HUMAN	E3 ubiquitin-protein ligase RNF170 (EC 2.3.2.27) (Putative LAG1-interacting protein) (RING finger protein 170) (RING-type E3 ubiquitin transferase RNF170)	RNF170	RNF170
14.6305	15.2324	14.5502	14.923	14.8863	14.9476	sp		1220	1369	14.689	15.0343	-0.345351	P20020-6	AT2B1_HUMAN	Plasma membrane calcium-transporting ATPase 1 (EC 7.2.2.10) (Plasma membrane calcium ATPase isoform 1) (PMCA1) (Plasma membrane calcium pump isoform 1)	ATP2B1 PMCA1	ATP2B1
17.4873	17.4661	17.3475	17.4364	16.3189	17.2846	sp		357	1276	17.0512	17.3957	-0.34449	O00303	EIF3F_HUMAN	Eukaryotic translation initiation factor 3 subunit F (eIF3f) (Deubiquitinating enzyme eIF3f) (EC 3.4.19.12) (Eukaryotic translation initiation factor 3 subunit 5) (eIF-3-epsilon) (eIF3 p47)	EIF3F EIF3S5	EIF3F
14.1782	14.8456	12.4955	14.5457	13.6224	11.9353	sp		346	2317	13.432	13.7755	-0.343505	Q8WVM0	TFB1M_HUMAN	Dimethyladenosine transferase 1, mitochondrial (EC 2.1.1.-) (Mitochondrial 12S rRNA dimethylase 1) (Mitochondrial transcription factor B1) (h-mtTFB) (h-mtTFB1) (hTFB1M) (mtTFB1) (S-adenosylmethionine-6-N', N'-adenosyl(rRNA) dimethyltransferase 1)	TFB1M CGI-75	TFB1M
14.1535	14.6253	14.1611	14.6551	14.5253	14.5846	sp		619	1151	14.28	14.6217	-0.341681	Q9UBU9	NXF1_HUMAN	Nuclear RNA export factor 1 (Tip-associated protein) (Tip-associating protein) (mRNA export factor TAP)	NXF1 TAP	NXF1
13.8411	13.9048	13.179	14.7512	13.93	13.3171	sp		834	1823	13.65	13.9911	-0.34103	Q9ULQ0	STRP2_HUMAN	Striatin-interacting protein 2 (Protein FAM40B)	STRIP2 FAM40B KIAA1170	STRIP2
16.3104	16.6498	16.4411	16.7895	16.2979	16.6248	sp		620	2183	16.3498	16.688	-0.338251	Q03252	LMNB2_HUMAN	Lamin-B2	LMNB2 LMN2	LMNB2
14.4686	15.6904	15.8249	15.8048	14.8451	14.6558	sp		586	886	15.0462	15.3837	-0.337458	P20700	LMNB1_HUMAN	Lamin-B1	LMNB1 LMN2 LMNB	LMNB1
16.6736	16.8179	16.0873	16.786	16.5757	16.7441	sp		216	1270	16.4455	16.7827	-0.337118	P51148	RAB5C_HUMAN	Ras-related protein Rab-5C (L1880) (RAB5L)	RAB5C RABL	RAB5C
16.5809	17.012	16.5598	16.9824	16.8402	16.9947	sp		247	847	16.6603	16.9964	-0.336054	Q9UFN0	NPS3A_HUMAN	Protein NipSnap homolog 3A (NipSnap3A) (Protein NipSnap homolog 4) (NipSnap4) (Target for Salmonella secreted protein C) (TassC)	NIPSNAP3A NIPSNAP4 HSPC299	NIPSNAP3A
15.875	15.9991	15.0825	15.3435	15.2631	15.8812	sp		1042	874	15.4069	15.7413	-0.334406	P42285	MTREX_HUMAN	Exosome RNA helicase MTR4 (EC 3.6.4.13) (ATP-dependent RNA helicase DOB1) (ATP-dependent RNA helicase SKIV2L2) (Superkiller viralicidic activity 2-like 2) (TRAMP-like complex helicase)	MTREX DOB1 KIAA0052 MTR4 SKIV2L2	MTREX
21.848	22.1211	21.8503	22.1179	21.5422	22.0033	tr		453	265	21.7468	22.0807	-0.333933	B4DJV2	B4DJV2_HUMAN	Citrate synthase	CS	CS
14.9296	15.2919	15.2771	15.1415	15.1405	15.9074	sp		740	1846	15.1157	15.4469	-0.331183	P51812	KS6A3_HUMAN	Ribosomal protein S6 kinase alpha-3 (S6K-alpha-3) (EC 2.7.11.1) (90 kDa ribosomal protein S6 kinase 3) (p90-RSK 3) (p90RSK3) (Insulin-stimulated protein kinase 1) (ISPK-1) (MAP kinase-activated protein kinase 1b) (MAPK-activated protein kinase 1b) (MAPKAP kinase 1b) (MAPKAPK-1b) (Ribosomal S6 kinase 2) (RSK-2) (pp90RSK2)	RPS6KA3 ISPK1 MAPKAPK1B RSK2	RPS6KA3
16.9568	17.243	16.9869	17.2187	16.9365	17.4106	sp		472	2044	16.9601	17.2908	-0.330694	Q96N66	MBOA7_HUMAN	Lysophospholipid acyltransferase 7 (LPLAT 7) (EC 2.3.1.-) (1-acylglycerophosphatidylinositol O-acyltransferase) (EC 2.3.1.n4) (Bladder and breast carcinoma-overexpressed gene 1 protein) (Leukocyte receptor cluster member 4) (Lysophosphatidylinositol acyltransferase) (LPIAT) (Lyso-PI acyltransferase) (Membrane-bound O-acyltransferase domain-containing protein 7) (O-acyltransferase domain-containin…	MBOAT7 BB1 LENG4 OACT7	MBOAT7
17.1822	17.4555	17.1836	17.4378	16.976	17.4365	tr		268	859	17.1139	17.4432	-0.3293	A0A0B4J2D5	A0A0B4J2D5_HUMAN	Glutamine amidotransferase-like class 1 domain-containing protein 3B, mitochondrial (Keio novel protein-I) (KNP-I) (Protein GT335) (Protein HES1)	GATD3B HES1 KNPI	GATD3B
13.9435	13.853	13.407	13.7856	13.3855	14.0831	sp		439	1649	13.5787	13.9072	-0.328551	Q9NP92	RT30_HUMAN	39S ribosomal protein S30, mitochondrial (MRP-S30) (S30mt) (Mitochondrial large ribosomal subunit protein mL65) (Mitochondrial large ribosomal subunit protein mS30) (Programmed cell death protein 9)	MRPS30 PDCD9 BM-047	MRPS30
15.5281	15.7986	15.5965	15.891	15.3494	15.7683	sp		174	2691	15.4913	15.8193	-0.327974	P03923	NU6M_HUMAN	NADH-ubiquinone oxidoreductase chain 6 (EC 7.1.1.2) (NADH dehydrogenase subunit 6)	MT-ND6 MTND6 NADH6 ND6	MT-ND6
17.6126	17.8239	17.3539	17.844	17.586	17.8685	tr		432	582	17.5175	17.8455	-0.327959	D6RER5	D6RER5_HUMAN	Septin-11	SEPTIN11	SEPTIN11
14.51	14.6683	14.7028	15.0707	14.4579	14.9155	tr		137	2572	14.5569	14.8848	-0.327956	H3BQQ9	H3BQQ9_HUMAN	SUMO-conjugating enzyme UBC9 (Fragment)	UBE2I	UBE2I
14.5398	15.0534	14.455	15.2018	15.2133	14.9338	sp		227	2126	14.736	15.063	-0.326952	Q92520	FAM3C_HUMAN	Protein FAM3C (Interleukin-like EMT inducer)	FAM3C ILEI GS3786	FAM3C
15.1391	15.0089	14.8726	15.6795	15.0065	15.3106	sp		103	2272	15.0061	15.333	-0.326944	Q9Y5J6	T10B_HUMAN	Mitochondrial import inner membrane translocase subunit Tim10 B (Fracture callus protein 1) (FxC1) (Mitochondrial import inner membrane translocase subunit Tim9 B) (TIMM10B) (Tim10b)	TIMM10B FXC1 TIM9B TIMM9B	TIMM10B
16.9847	17.2897	16.8607	17.2673	17.0252	17.2906	sp		480	1202	16.9569	17.2825	-0.325651	Q92743	HTRA1_HUMAN	Serine protease HTRA1 (EC 3.4.21.-) (High-temperature requirement A serine peptidase 1) (L56) (Serine protease 11)	HTRA1 HTRA PRSS11	HTRA1
17.3774	17.3782	16.9123	17.3839	17.1103	17.6022	sp		409	1191	17.1333	17.4548	-0.321436	P54727	RD23B_HUMAN	UV excision repair protein RAD23 homolog B (HR23B) (hHR23B) (XP-C repair-complementing complex 58 kDa protein) (p58)	RAD23B	RAD23B
15.3413	15.41	14.8578	15.5777	15.2303	15.4053	sp		469	2665	15.1432	15.4644	-0.3212	Q92504	S39A7_HUMAN	Zinc transporter SLC39A7 (Histidine-rich membrane protein Ke4) (Really interesting new gene 5 protein) (Solute carrier family 39 member 7) (Zrt-, Irt-like protein 7) (ZIP7)	SLC39A7 HKE4 RING5	SLC39A7
15.1902	15.9487	16.344	16.2915	14.923	15.176	sp		435	1118	15.4857	15.8054	-0.319668	P18031	PTN1_HUMAN	Tyrosine-protein phosphatase non-receptor type 1 (EC 3.1.3.48) (Protein-tyrosine phosphatase 1B) (PTP-1B)	PTPN1 PTP1B	PTPN1
17.2629	17.3267	16.5725	17.3892	17.2715	17.3496	tr		260	1423	17.0356	17.3551	-0.319534	M0QXB5	M0QXB5_HUMAN	Persulfide dioxygenase ETHE1, mitochondrial	ETHE1	ETHE1
13.6831	13.7665	12.4223	13.3635	13.4184	13.3515	tr		468	2131	13.1746	13.4938	-0.319237	D6REA1	D6REA1_HUMAN	Nucleotide exchange factor SIL1	SIL1	SIL1
12.6311	12.5142	12.3537	13.3353	12.6758	12.7678	tr		416	1623	12.5535	12.8724	-0.318848	E9PC52	E9PC52_HUMAN	Histone-binding protein RBBP7	RBBP7	RBBP7
17.1253	17.5576	17.188	17.3562	17.2486	17.6044	sp		955	525	17.1873	17.506	-0.318783	Q9Y2W1	TR150_HUMAN	Thyroid hormone receptor-associated protein 3 (BCLAF1 and THRAP3 family member 2) (Thyroid hormone receptor-associated protein complex 150 kDa component) (Trap150)	THRAP3 BCLAF2 TRAP150	THRAP3
13.3256	12.1313	13.579	15.3931	12.5751	12.9085	sp		221	1967	13.1599	13.4776	-0.317754	Q9HCN8	SDF2L_HUMAN	Stromal cell-derived factor 2-like protein 1 (SDF2-like protein 1) (PWP1-interacting protein 8)	SDF2L1 UNQ1941/PRO4424	SDF2L1
16.5644	16.9861	16.786	17.0651	16.7662	17.018	sp		259	1251	16.7055	17.0231	-0.317591	O96011	PX11B_HUMAN	Peroxisomal membrane protein 11B (Peroxin-11B) (Peroxisomal biogenesis factor 11B) (Protein PEX11 homolog beta) (PEX11-beta)	PEX11B	PEX11B
15.9654	16.126	15.1603	15.9176	15.9357	15.9695	sp		631	1048	15.6871	16.0044	-0.317234	O60216	RAD21_HUMAN	Double-strand-break repair protein rad21 homolog (hHR21) (Nuclear matrix protein 1) (NXP-1) (SCC1 homolog) [Cleaved into: 64-kDa C-terminal product (64-kDa carboxy-terminal product) (65-kDa carboxy-terminal product)]	RAD21 HR21 KIAA0078 NXP1 SCC1	RAD21
13.8361	14.1459	13.4902	14.0638	13.8122	13.8786	sp		279	2371	13.7128	14.0295	-0.316641	O00165	HAX1_HUMAN	HCLS1-associated protein X-1 (HS1-associating protein X-1) (HAX-1) (HS1-binding protein 1) (HSP1BP-1)	HAX1 HS1BP1	HAX1
18.4081	18.7501	18.4136	18.6798	18.31	18.6511	sp		432	881	18.3772	18.6936	-0.316414	P45954	ACDSB_HUMAN	Short/branched chain specific acyl-CoA dehydrogenase, mitochondrial (SBCAD) (EC 1.3.8.5) (2-methyl branched chain acyl-CoA dehydrogenase) (2-MEBCAD) (2-methylbutyryl-coenzyme A dehydrogenase) (2-methylbutyryl-CoA dehydrogenase)	ACADSB	ACADSB
14.2168	15.8258	15.8089	15.1271	15.9014	15.9207	tr		278	1870	15.309	15.6245	-0.315484	F6WQW2	F6WQW2_HUMAN	Ran-specific GTPase-activating protein	RANBP1	RANBP1
17.3123	17.2549	17.247	16.6694	15.9244	17.5055	sp		118	1923	16.8279	17.1433	-0.315363	Q5XKP0	MIC13_HUMAN	MICOS complex subunit MIC13 (Protein P117)	MICOS13 C19orf70 MIC13 QIL1	MICOS13
18.2552	18.3525	17.6859	18.3616	18.1862	18.3587	tr		739	293	18.0424	18.3576	-0.315187	I3L0N3	I3L0N3_HUMAN	Vesicle-fusing ATPase	NSF	NSF
17.1026	17.6423	17.4254	17.5148	17.3242	17.64	sp		434	642	17.2841	17.599	-0.314983	Q8NFW8	NEUA_HUMAN	N-acylneuraminate cytidylyltransferase (EC 2.7.7.43) (CMP-N-acetylneuraminic acid synthase) (CMP-NeuNAc synthase)	CMAS	CMAS
15.6953	15.9451	15.8619	15.9905	15.4607	16.0233	sp		391	1543	15.6726	15.9863	-0.313708	P38159	RBMX_HUMAN	RNA-binding motif protein, X chromosome (Glycoprotein p43) (Heterogeneous nuclear ribonucleoprotein G) (hnRNP G) [Cleaved into: RNA-binding motif protein, X chromosome, N-terminally processed]	RBMX HNRPG RBMXP1	RBMX
16.2972	16.248	16.2454	16.3797	15.3558	16.2076	sp		582	2091	15.9661	16.2784	-0.312284	P50281	MMP14_HUMAN	Matrix metalloproteinase-14 (MMP-14) (EC 3.4.24.80) (MMP-X1) (Membrane-type matrix metalloproteinase 1) (MT-MMP 1) (MTMMP1) (Membrane-type-1 matrix metalloproteinase) (MT1-MMP) (MT1MMP)	MMP14	MMP14
14.9596	15.2353	15.0623	15.1414	14.5489	15.1301	sp		632	743	14.8569	15.1689	-0.311955	Q06787-6	FMR1_HUMAN	Synaptic functional regulator FMR1 (Fragile X mental retardation protein 1) (FMRP) (Protein FMR-1)	FMR1	FMR1
18.0382	18.473	18.2855	18.58	18.2229	18.4284	sp		398	1592	18.1822	18.4938	-0.311623	Q9Y639-5	NPTN_HUMAN	Neuroplastin (Stromal cell-derived receptor 1) (SDR-1)	NPTN SDFR1 SDR1	NPTN
13.7516	13.968	13.4601	13.867	13.7948	14.106	tr		1458	1651	13.6688	13.9803	-0.311492	Q5TG12	Q5TG12_HUMAN	Receptor-type tyrosine-protein phosphatase kappa	PTPRK	PTPRK
14.8459	15.5791	15.3837	15.208	15.0034	15.3741	sp		261	2554	15.0777	15.387	-0.309354	P00414	COX3_HUMAN	Cytochrome c oxidase subunit 3 (Cytochrome c oxidase polypeptide III)	MT-CO3 COIII COXIII MTCO3	MT-CO3
17.0786	17.1634	16.3894	17.1794	17.0693	17.1213	tr		163	1989	16.8458	17.1547	-0.308952	E5RJR5	E5RJR5_HUMAN	S-phase kinase-associated protein 1	SKP1	SKP1
13.737	14.0714	13.7759	14.217	13.9138	14.0648	tr		170	2437	13.8089	14.1177	-0.3088	E9PL57	E9PL57_HUMAN	NEDD8-MDP1 readthrough (Fragment)	NEDD8-MDP1	NEDD8-MDP1
14.6568	15.3051	15.2711	15.3829	15.1431	15.3078	sp		1978	677	15.0237	15.3319	-0.30827	Q14966	ZN638_HUMAN	Zinc finger protein 638 (Cutaneous T-cell lymphoma-associated antigen se33-1) (CTCL-associated antigen se33-1) (Nuclear protein 220) (Zinc finger matrin-like protein)	ZNF638 NP220 ZFML	ZNF638
14.8353	15.3451	15.088	15.4398	15.1476	15.2069	sp		259	2186	15.0237	15.3306	-0.306981	Q16563-2	SYPL1_HUMAN	Synaptophysin-like protein 1 (Pantophysin)	SYPL1 SYPL	SYPL1
15.3997	16.014	15.5795	15.8752	15.6289	15.6389	sp		68	2682	15.5361	15.8427	-0.306636	P60059	SC61G_HUMAN	Protein transport protein Sec61 subunit gamma	SEC61G	SEC61G
16.2228	16.1193	16.2306	16.1867	15.1236	16.1902	tr		647	312	15.859	16.1654	-0.306418	A0A0D9SG12	A0A0D9SG12_HUMAN	ATP-dependent RNA helicase DDX3X	DDX3X	DDX3X
13.682	13.8793	12.6484	13.9662	13.2196	12.6208	sp		288	2338	13.1833	13.4888	-0.305453	Q53H82	LACB2_HUMAN	Endoribonuclease LACTB2 (EC 3.1.27.-) (Beta-lactamase-like protein 2)	LACTB2 CGI-83	LACTB2
17.3972	16.6447	15.6785	16.6467	15.252	15.9525	sp		364	652	16.1092	16.4146	-0.305418	Q53GG5-2	PDLI3_HUMAN	PDZ and LIM domain protein 3 (Actinin-associated LIM protein) (Alpha-actinin-2-associated LIM protein)	PDLIM3 ALP	PDLIM3
17.569	17.6374	17.5365	17.5565	16.8364	17.6599	sp		1103	285	17.314	17.618	-0.30398	P54289-4	CA2D1_HUMAN	Voltage-dependent calcium channel subunit alpha-2/delta-1 (Voltage-gated calcium channel subunit alpha-2/delta-1) [Cleaved into: Voltage-dependent calcium channel subunit alpha-2-1;Voltage-dependent calcium channel subunit delta-1]	CACNA2D1 CACNL2A CCHL2A MHS3	CACNA2D1
15.0447	14.9053	13.7552	14.8016	14.9318	14.9343	tr		431	1809	14.5772	14.8804	-0.303196	B1AMS2	B1AMS2_HUMAN	Septin 6, isoform CRA_b (Septin-6)	SEPTIN6 SEPT6 hCG_23191	SEPTIN6
18.7841	19.0774	18.7532	19.1818	19.011	19.1929	sp		397	424	18.8494	19.1507	-0.301279	P42765	THIM_HUMAN	3-ketoacyl-CoA thiolase, mitochondrial (EC 2.3.1.16) (Acetyl-CoA acetyltransferase) (EC 2.3.1.9) (Acetyl-CoA acyltransferase) (Acyl-CoA hydrolase, mitochondrial) (EC 3.1.2.-) (EC 3.1.2.1) (EC 3.1.2.2) (Beta-ketothiolase) (Mitochondrial 3-oxoacyl-CoA thiolase) (T1)	ACAA2	ACAA2
17.0409	17.5351	17.387	17.5028	17.3098	17.5991	sp		191	1404	17.2459	17.5457	-0.299772	O75340	PDCD6_HUMAN	Programmed cell death protein 6 (Apoptosis-linked gene 2 protein homolog) (ALG-2)	PDCD6 ALG2	PDCD6
17.3899	17.2801	17.0334	17.4917	16.9704	17.5209	sp		680	400	17.1312	17.4309	-0.299665	Q96AC1-3	FERM2_HUMAN	Fermitin family homolog 2 (Kindlin-2) (Mitogen-inducible gene 2 protein) (MIG-2) (Pleckstrin homology domain-containing family C member 1) (PH domain-containing family C member 1)	FERMT2 KIND2 MIG2 PLEKHC1	FERMT2
16.4713	17.3696	17.3587	17.377	17.3174	17.2979	sp		520	948	17.0492	17.3481	-0.298971	Q9H857-2	NT5D2_HUMAN	5'-nucleotidase domain-containing protein 2 (EC 3.1.3.-)	NT5DC2	NT5DC2
14.3869	15.2729	15.3658	15.3146	15.1336	15.1928	sp		741	1580	14.9621	15.26	-0.297938	Q8IWA4	MFN1_HUMAN	Mitofusin-1 (EC 3.6.5.-) (Fzo homolog) (Transmembrane GTPase MFN1)	MFN1	MFN1
15.7245	14.6553	15.7473	16.0169	14.3094	16.0012	sp		128	2504	15.2604	15.5578	-0.297374	O60783	RT14_HUMAN	28S ribosomal protein S14, mitochondrial (MRP-S14) (S14mt) (Mitochondrial small ribosomal subunit protein uS14m)	MRPS14	MRPS14
15.1282	15.3962	15.3846	15.2526	14.7008	15.4528	tr		892	1033	15.0712	15.3672	-0.296021	A0A0C4DFT3	A0A0C4DFT3_HUMAN	Disks large homolog 1	DLG1	DLG1
16.957	17.4336	17.4447	17.4965	17.135	17.494	sp		343	960	17.1789	17.4747	-0.295805	Q02338	BDH_HUMAN	D-beta-hydroxybutyrate dehydrogenase, mitochondrial (EC 1.1.1.30) (3-hydroxybutyrate dehydrogenase) (BDH) (Short chain dehydrogenase/reductase family 9C member 1)	BDH1 BDH SDR9C1	BDH1
16.0903	15.5099	14.7545	16.3228	16.2319	16.1306	sp		1010	1177	15.6922	15.9878	-0.295565	P22102	PUR2_HUMAN	Trifunctional purine biosynthetic protein adenosine-3 [Includes: Phosphoribosylamine--glycine ligase (EC 6.3.4.13) (Glycinamide ribonucleotide synthetase) (GARS) (Phosphoribosylglycinamide synthetase);Phosphoribosylformylglycinamidine cyclo-ligase (EC 6.3.3.1) (AIR synthase) (AIRS) (Phosphoribosyl-aminoimidazole synthetase);Phosphoribosylglycinamide formyltransferase (EC 2.1.2.2) (5'-phosphoribos…	GART PGFT PRGS	GART
14.2222	14.187	13.5937	14.3137	14.102	14.3018	sp		318	1880	13.9726	14.2675	-0.294883	Q92820	GGH_HUMAN	Gamma-glutamyl hydrolase (EC 3.4.19.9) (Conjugase) (GH) (Gamma-Glu-X carboxypeptidase)	GGH	GGH
17.2505	17.6287	17.3292	17.6552	17.3933	17.5724	sp		172	1081	17.3243	17.6188	-0.294468	O96000	NDUBA_HUMAN	NADH dehydrogenase [ubiquinone] 1 beta subcomplex subunit 10 (Complex I-PDSW) (CI-PDSW) (NADH-ubiquinone oxidoreductase PDSW subunit)	NDUFB10	NDUFB10
16.5716	17.1084	17.0544	17.0837	16.9216	17.2388	sp		939	358	16.8492	17.1436	-0.294437	O94973	AP2A2_HUMAN	AP-2 complex subunit alpha-2 (100 kDa coated vesicle protein C) (Adaptor protein complex AP-2 subunit alpha-2) (Adaptor-related protein complex 2 subunit alpha-2) (Alpha-adaptin C) (Alpha2-adaptin) (Clathrin assembly protein complex 2 alpha-C large chain) (Huntingtin yeast partner J) (Huntingtin-interacting protein 9) (HIP-9) (Huntingtin-interacting protein J) (Plasma membrane adaptor HA2/AP2 ada…	AP2A2 ADTAB CLAPA2 HIP9 HYPJ KIAA0899	AP2A2
17.213	17.3588	16.5346	17.032	17.0463	17.2821	sp		326	1195	16.9313	17.2243	-0.292957	Q9NQG5	RPR1B_HUMAN	Regulation of nuclear pre-mRNA domain-containing protein 1B (Cell cycle-related and expression-elevated protein in tumor)	RPRD1B C20orf77 CREPT	RPRD1B
12.1877	10.26	12.3788	12.7985	9.07874	11.4647	sp		1907	1951	11.2151	11.5077	-0.292662	Q96L96	ALPK3_HUMAN	Alpha-protein kinase 3 (EC 2.7.11.1) (Muscle alpha-protein kinase)	ALPK3 KIAA1330 MAK	ALPK3
14.6734	14.9859	14.7129	14.8783	14.7764	15.1715	sp		152	2673	14.7209	15.0119	-0.290974	P15531	NDKA_HUMAN	Nucleoside diphosphate kinase A (NDK A) (NDP kinase A) (EC 2.7.4.6) (Granzyme A-activated DNase) (GAAD) (Metastasis inhibition factor nm23) (NM23-H1) (Tumor metastatic process-associated protein)	NME1 NDPKA NM23	NME1
16.8333	17.3038	16.9319	17.194	16.9978	17.1345	sp		631	707	16.921	17.2108	-0.289764	Q969Z0	FAKD4_HUMAN	FAST kinase domain-containing protein 4 (Cell cycle progression restoration protein 2) (Cell cycle progression protein 2) (Protein TBRG4) (Transforming growth factor beta regulator 4)	TBRG4 CPR2 FASTKD4 KIAA0948	TBRG4
11.8317	12.6105	13.1428	12.3172	12.3333	13.2462	sp		1236	1632	12.4359	12.7246	-0.288682	O75155	CAND2_HUMAN	Cullin-associated NEDD8-dissociated protein 2 (Cullin-associated and neddylation-dissociated protein 2) (Epididymis tissue protein Li 169) (TBP-interacting protein of 120 kDa B) (TBP-interacting protein 120B) (p120 CAND2)	CAND2 KIAA0667 TIP120B	CAND2
18.1225	18.4271	18.1717	18.5565	18.1038	18.2803	sp		400	858	18.1327	18.4213	-0.28861	Q9BTV4	TMM43_HUMAN	Transmembrane protein 43 (Protein LUMA)	TMEM43 UNQ2564/PRO6244	TMEM43
19.2066	19.544	19.1746	19.5041	19.2146	19.4123	sp		520	398	19.1986	19.4868	-0.288189	P55809	SCOT1_HUMAN	Succinyl-CoA:3-ketoacid coenzyme A transferase 1, mitochondrial (EC 2.8.3.5) (3-oxoacid CoA-transferase 1) (Somatic-type succinyl-CoA:3-oxoacid CoA-transferase) (SCOT-s)	OXCT1 OXCT SCOT	OXCT1
15.3838	15.8412	15.4201	15.6594	15.4898	15.6524	sp		1037	453	15.4312	15.7177	-0.286434	Q5JRX3	PREP_HUMAN	Presequence protease, mitochondrial (hPreP) (EC 3.4.24.-) (Pitrilysin metalloproteinase 1) (Metalloprotease 1) (hMP1)	PITRM1 KIAA1104 MP1 PREP	PITRM1
13.1353	13.3422	13.1714	13.5342	10.1324	10.4207	sp		506	1015	12.1464	12.4324	-0.285991	P49590	SYHM_HUMAN	Probable histidine--tRNA ligase, mitochondrial (EC 6.1.1.21) (Histidine--tRNA ligase-like) (Histidyl-tRNA synthetase) (HisRS)	HARS2 HARSL HARSR HO3	HARS2
14.9989	15.3692	15.2147	15.3287	15.1053	15.4784	sp		151	2516	15.1063	15.3921	-0.285762	O15511	ARPC5_HUMAN	Actin-related protein 2/3 complex subunit 5 (Arp2/3 complex 16 kDa subunit) (p16-ARC)	ARPC5 ARC16	ARPC5
15.803	16.2945	16.2888	16.3103	16.0611	16.3962	sp		793	993	16.051	16.3337	-0.282703	Q8IXB1	DJC10_HUMAN	DnaJ homolog subfamily C member 10 (EC 1.8.4.-) (Endoplasmic reticulum DNA J domain-containing protein 5) (ER-resident protein ERdj5) (ERdj5) (Macrothioredoxin) (MTHr)	DNAJC10 ERDJ5 UNQ495/PRO1012	DNAJC10
18.3257	18.5945	18.2612	18.5893	18.1189	18.3695	sp		239	635	18.2353	18.5178	-0.282505	P54819	KAD2_HUMAN	Adenylate kinase 2, mitochondrial (AK 2) (EC 2.7.4.3) (ATP-AMP transphosphorylase 2) (ATP:AMP phosphotransferase) (Adenylate monophosphate kinase) [Cleaved into: Adenylate kinase 2, mitochondrial, N-terminally processed]	AK2 ADK2	AK2
14.4288	14.6102	14.4071	14.9641	14.8822	14.9885	sp		477	1626	14.5727	14.8542	-0.281571	P50336	PPOX_HUMAN	Protoporphyrinogen oxidase (PPO) (EC 1.3.3.4)	PPOX	PPOX
17.937	18.2651	17.9169	17.9931	17.8119	18.2454	sp		346	818	17.8886	18.1679	-0.279257	P53597	SUCA_HUMAN	Succinate--CoA ligase [ADP/GDP-forming] subunit alpha, mitochondrial (EC 6.2.1.4) (EC 6.2.1.5) (Succinyl-CoA synthetase subunit alpha) (SCS-alpha)	SUCLG1	SUCLG1
17.448	17.1355	16.7301	17.2834	16.7631	17.3586	sp		154	986	16.9804	17.2592	-0.27878	P63241	IF5A1_HUMAN	Eukaryotic translation initiation factor 5A-1 (eIF-5A-1) (eIF-5A1) (Eukaryotic initiation factor 5A isoform 1) (eIF-5A) (Rev-binding factor) (eIF-4D)	EIF5A	EIF5A
13.5422	13.8332	13.7298	13.9367	13.5223	13.8577	sp		590	2274	13.5981	13.8759	-0.27775	P13647	K2C5_HUMAN	Keratin, type II cytoskeletal 5 (58 kDa cytokeratin) (Cytokeratin-5) (CK-5) (Keratin-5) (K5) (Type-II keratin Kb5)	KRT5	KRT5
13.4332	13.5624	13.6484	13.9766	13.7874	14.1622	sp		661	2364	13.623	13.9004	-0.27741	Q9H7D7	WDR26_HUMAN	WD repeat-containing protein 26 (CUL4- and DDB1-associated WDR protein 2) (Myocardial ischemic preconditioning up-regulated protein 2)	WDR26 CDW2 MIP2 PRO0852	WDR26
18.9039	19.1651	18.832	19.1772	18.8723	19.096	sp		1032	2024	18.8694	19.1461	-0.276674	O95197-3	RTN3_HUMAN	Reticulon-3 (Homolog of ASY protein) (HAP) (Neuroendocrine-specific protein-like 2) (NSP-like protein 2) (Neuroendocrine-specific protein-like II) (NSP-like protein II) (NSPLII)	RTN3 ASYIP NSPL2	RTN3
19.7197	19.9809	19.7671	19.9607	19.6629	20.0355	tr		767	203	19.7166	19.9924	-0.275814	A0A0A0MT01	A0A0A0MT01_HUMAN	Gelsolin	GSN	GSN
14.7088	14.9593	14.5948	14.8564	14.7029	15.0172	tr		460	2493	14.6688	14.9443	-0.275471	E5RK69	E5RK69_HUMAN	Annexin	ANXA6	ANXA6
14.4748	14.5805	14.4305	14.9206	14.5494	14.7764	sp		337	1563	14.4849	14.7592	-0.2743	Q6P4A7	SFXN4_HUMAN	Sideroflexin-4 (Breast cancer resistance marker 1)	SFXN4 BCRM1	SFXN4
21.2522	21.5726	21.3319	21.5891	21.2985	21.5431	sp		427	355	21.2942	21.5683	-0.274063	P24752	THIL_HUMAN	Acetyl-CoA acetyltransferase, mitochondrial (EC 2.3.1.9) (Acetoacetyl-CoA thiolase) (T2)	ACAT1 ACAT MAT	ACAT1
15.9235	16.2313	15.7332	16.0336	15.9187	16.1311	sp		200	2310	15.8585	16.132	-0.273502	O15347	HMGB3_HUMAN	High mobility group protein B3 (High mobility group protein 2a) (HMG-2a) (High mobility group protein 4) (HMG-4)	HMGB3 HMG2A HMG4	HMGB3
16.7955	17.0509	16.7807	16.9541	16.5794	16.9604	tr		263	1882	16.7185	16.9885	-0.26993	F8W031	F8W031_HUMAN	DUF3456 domain-containing protein (Fragment)
15.6721	15.7777	15.5983	16.1941	16.2786	16.3862	sp		123	2070	15.8497	16.1193	-0.26966	P42766	RL35_HUMAN	60S ribosomal protein L35 (Large ribosomal subunit protein uL29)	RPL35	RPL35
17.0596	17.3346	17.0968	17.4393	17.1923	17.3818	sp		315	363	17.1162	17.3852	-0.268984	O43852	CALU_HUMAN	Calumenin (Crocalbin) (IEF SSP 9302)	CALU	CALU
18.414	18.6626	18.4232	18.5979	18.2731	18.6551	sp		294	1113	18.3701	18.6386	-0.26848	P06748	NPM_HUMAN	Nucleophosmin (NPM) (Nucleolar phosphoprotein B23) (Nucleolar protein NO38) (Numatrin)	NPM1 NPM	NPM1
15.4201	15.4169	14.9609	15.3987	15.2192	15.5894	sp		158	1737	15.2001	15.4683	-0.268276	Q8N5N7	RM50_HUMAN	39S ribosomal protein L50, mitochondrial (L50mt) (MRP-L50) (Mitochondrial large ribosomal subunit protein mL50)	MRPL50	MRPL50
14.38	15.5011	15.6236	14.6715	15.2746	15.9048	sp		314	2278	15.0927	15.3591	-0.266383	Q5BJH7	YIF1B_HUMAN	Protein YIF1B (YIP1-interacting factor homolog B)	YIF1B PP4519 UNQ3073/PRO9905	YIF1B
15.3767	15.6311	15.5294	15.8949	15.5018	15.6753	sp		207	1668	15.4693	15.7338	-0.264471	P61006	RAB8A_HUMAN	Ras-related protein Rab-8A (Oncogene c-mel)	RAB8A MEL RAB8	RAB8A
14.372	14.8061	14.5281	14.6913	14.3489	14.5442	sp		344	1417	14.4163	14.6805	-0.264214	Q13247	SRSF6_HUMAN	Serine/arginine-rich splicing factor 6 (Pre-mRNA-splicing factor SRP55) (Splicing factor, arginine/serine-rich 6)	SRSF6 SFRS6 SRP55	SRSF6
18.8528	19.0533	18.8288	19.1091	18.7677	19.0786	sp		330	919	18.8164	19.0803	-0.26392	Q3SXM5	HSDL1_HUMAN	Inactive hydroxysteroid dehydrogenase-like protein 1 (Short chain dehydrogenase/reductase family 12C member 3)	HSDL1 SDR12C3	HSDL1
18.2714	18.8332	18.5984	18.5142	18.5262	18.8385	sp		271	815	18.4653	18.7286	-0.263275	Q13162	PRDX4_HUMAN	Peroxiredoxin-4 (EC 1.11.1.15) (Antioxidant enzyme AOE372) (AOE37-2) (Peroxiredoxin IV) (Prx-IV) (Thioredoxin peroxidase AO372) (Thioredoxin-dependent peroxide reductase A0372)	PRDX4	PRDX4
20.1994	20.4019	20.1859	20.3983	20.0178	20.3923	sp		317	446	20.1344	20.3975	-0.263107	P63244	RACK1_HUMAN	Receptor of activated protein C kinase 1 (Cell proliferation-inducing gene 21 protein) (Guanine nucleotide-binding protein subunit beta-2-like 1) (Guanine nucleotide-binding protein subunit beta-like protein 12.3) (Human lung cancer oncogene 7 protein) (HLC-7) (Receptor for activated C kinase) (Small ribosomal subunit protein RACK1) [Cleaved into: Receptor of activated protein C kinase 1, N-termi…	RACK1 GNB2L1 HLC7 PIG21	RACK1
14.9347	14.9889	14.7509	15.1322	14.7909	15.1441	tr		222	2036	14.8255	15.0884	-0.262859	E9PM62	E9PM62_HUMAN	Protein wntless homolog (Fragment)	WLS	WLS
19.1781	19.4634	19.2064	19.3819	19.1467	19.4732	sp		534	257	19.177	19.4395	-0.262484	P13674	P4HA1_HUMAN	Prolyl 4-hydroxylase subunit alpha-1 (4-PH alpha-1) (EC 1.14.11.2) (Procollagen-proline,2-oxoglutarate-4-dioxygenase subunit alpha-1)	P4HA1 P4HA	P4HA1
13.2581	14.2434	14.223	13.7254	13.9021	14.2011	tr		305	2591	13.7944	14.0566	-0.262228	A0A2C9F2P4	A0A2C9F2P4_HUMAN	Palmitoyl-protein thioesterase 1	PPT1	PPT1
18.4383	18.5619	18.3428	18.7266	18.177	18.4538	sp		302	1019	18.3194	18.5808	-0.261389	P42126	ECI1_HUMAN	Enoyl-CoA delta isomerase 1, mitochondrial (EC 5.3.3.8) (3,2-trans-enoyl-CoA isomerase) (Delta(3),Delta(2)-enoyl-CoA isomerase) (D3,D2-enoyl-CoA isomerase) (Dodecenoyl-CoA isomerase)	ECI1 DCI	ECI1
12.9698	14.0354	13.8779	13.6143	13.8082	13.7891	sp		669	2612	13.5519	13.8129	-0.260992	Q8N442	GUF1_HUMAN	Translation factor GUF1, mitochondrial (EC 3.6.5.-) (Elongation factor 4 homolog) (EF-4) (GTPase GUF1) (Ribosomal back-translocase)	GUF1	GUF1
18.5927	18.8657	18.6281	18.8386	18.5997	18.8981	sp		432	410	18.6069	18.8675	-0.260611	Q96I99	SUCB2_HUMAN	Succinate--CoA ligase [GDP-forming] subunit beta, mitochondrial (EC 6.2.1.4) (GTP-specific succinyl-CoA synthetase subunit beta) (G-SCS) (GTPSCS) (Succinyl-CoA synthetase beta-G chain) (SCS-betaG)	SUCLG2	SUCLG2
20.447	20.7322	20.4561	20.6791	20.488	20.7605	tr		1679	21	20.4637	20.7239	-0.260252	A0A087WVQ6	A0A087WVQ6_HUMAN	Clathrin heavy chain	CLTC hCG_1818599	CLTC
16.513	16.4455	15.8767	16.4677	16.2601	16.5161	sp		395	1117	16.2166	16.4764	-0.259829	Q92665	RT31_HUMAN	28S ribosomal protein S31, mitochondrial (MRP-S31) (S31mt) (Imogen 38) (Mitochondrial small ribosomal subunit protein mS31)	MRPS31 IMOGN38	MRPS31
15.8831	16.106	15.9319	15.8497	15.3039	15.9383	sp		1475	1129	15.7063	15.9646	-0.258355	P49790	NU153_HUMAN	Nuclear pore complex protein Nup153 (153 kDa nucleoporin) (Nucleoporin Nup153)	NUP153	NUP153
16.9841	17.1212	17.0006	17.1106	16.6201	17.1462	sp		743	584	16.8683	17.126	-0.257708	Q9Y4J8-15	DTNA_HUMAN	Dystrobrevin alpha (DTN-A) (Alpha-dystrobrevin) (Dystrophin-related protein 3)	DTNA DRP3	DTNA
18.2871	18.6051	18.2656	18.5099	18.3553	18.5656	sp		345	1835	18.3027	18.5602	-0.257532	Q9H3K2	GHITM_HUMAN	Growth hormone-inducible transmembrane protein (Dermal papilla-derived protein 2) (Mitochondrial morphology and cristae structure 1) (MICS1) (Transmembrane BAX inhibitor motif-containing protein 5)	GHITM DERP2 MICS1 TMBIM5 My021 UNQ244/PRO281	GHITM
16.3468	16.5434	16.3239	16.6529	16.3727	16.6191	sp		217	1565	16.3478	16.6051	-0.257284	Q9HAV7	GRPE1_HUMAN	GrpE protein homolog 1, mitochondrial (HMGE) (Mt-GrpE#1)	GRPEL1 GREPEL1	GRPEL1
14.7632	15.0127	14.6666	15.0275	14.8031	14.9612	tr		256	2198	14.7443	15.0005	-0.256192	J3QTA6	J3QTA6_HUMAN	MICOS complex subunit	CHCHD6	CHCHD6
13.7883	14.0451	14.1832	13.8555	13.4009	14.2379	sp		398	2701	13.7908	14.0462	-0.255358	P15291-2	B4GT1_HUMAN	Beta-1,4-galactosyltransferase 1 (Beta-1,4-GalTase 1) (Beta4Gal-T1) (b4Gal-T1) (EC 2.4.1.-) (Beta-N-acetylglucosaminyl-glycolipid beta-1,4-galactosyltransferase) (Beta-N-acetylglucosaminylglycopeptide beta-1,4-galactosyltransferase) (EC 2.4.1.38) (Lactose synthase A protein) (EC 2.4.1.22) (N-acetyllactosamine synthase) (EC 2.4.1.90) (Nal synthase) (UDP-Gal:beta-GlcNAc beta-1,4-galactosyltransfera…	B4GALT1 GGTB2	B4GALT1
18.1125	18.0508	17.9879	18.352	17.9538	18.4173	sp		998	228	18.0181	18.2733	-0.255276	P78347	GTF2I_HUMAN	General transcription factor II-I (GTFII-I) (TFII-I) (Bruton tyrosine kinase-associated protein 135) (BAP-135) (BTK-associated protein 135) (SRF-Phox1-interacting protein) (SPIN) (Williams-Beuren syndrome chromosomal region 6 protein)	GTF2I BAP135 WBSCR6	GTF2I
17.7004	17.9676	17.7263	17.9746	17.809	18.058	sp		210	926	17.7453	18	-0.254789	P09211	GSTP1_HUMAN	Glutathione S-transferase P (EC 2.5.1.18) (GST class-pi) (GSTP1-1)	GSTP1 FAEES3 GST3	GSTP1
17.2817	17.571	17.4151	17.621	17.3122	17.5764	sp		169	2294	17.3364	17.5895	-0.253138	Q99643	C560_HUMAN	Succinate dehydrogenase cytochrome b560 subunit, mitochondrial (Integral membrane protein CII-3) (QPs-1) (QPs1) (Succinate dehydrogenase complex subunit C) (Succinate-ubiquinone oxidoreductase cytochrome B large subunit) (CYBL)	SDHC CYB560 SDH3	SDHC
16.2745	16.4958	16.1356	16.5345	16.2939	16.433	tr		128	2650	16.2347	16.4877	-0.253094	F5H6U7	F5H6U7_HUMAN	Vesicle transport protein GOT1B	GOLT1B	GOLT1B
15.7535	16.0103	15.7678	15.9639	15.6542	15.9573	sp		NaN	184	15.7252	15.9772	-0.252019	Q0ZGT2	NEXN_HUMAN
17.2573	17.6301	16.953	17.6018	17.4469	17.1788	sp		257	1062	17.219	17.4703	-0.251223	P62917	RL8_HUMAN	60S ribosomal protein L8 (Large ribosomal subunit protein uL2)	RPL8	RPL8
17.8239	18.0858	17.8676	18.1517	17.9127	18.1195	tr		206	1614	17.8681	18.119	-0.250952	H0Y886	H0Y886_HUMAN	NADH dehydrogenase [ubiquinone] 1 beta subcomplex subunit 5, mitochondrial (Fragment)	NDUFB5	NDUFB5
18.456	18.6946	18.3599	18.6399	18.4752	18.7058	sp		141	1756	18.4304	18.6801	-0.249708	Q86Y39	NDUAB_HUMAN	NADH dehydrogenase [ubiquinone] 1 alpha subcomplex subunit 11 (Complex I-B14.7) (CI-B14.7) (NADH-ubiquinone oxidoreductase subunit B14.7)	NDUFA11	NDUFA11
19.1114	19.4349	19.13	19.3529	19.1384	19.3404	sp		210	1540	19.1266	19.3761	-0.249445	O00217	NDUS8_HUMAN	NADH dehydrogenase [ubiquinone] iron-sulfur protein 8, mitochondrial (EC 1.6.99.3) (EC 7.1.1.2) (Complex I-23kD) (CI-23kD) (NADH-ubiquinone oxidoreductase 23 kDa subunit) (TYKY subunit)	NDUFS8	NDUFS8
16.4716	16.6364	16.4486	16.7035	16.3101	16.6327	sp		627	715	16.4101	16.6575	-0.247431	Q9UHB9	SRP68_HUMAN	Signal recognition particle subunit SRP68 (SRP68) (Signal recognition particle 68 kDa protein)	SRP68	SRP68
17.2228	17.4002	17.1299	17.4026	17.1719	17.4615	tr		1268	194	17.1749	17.4214	-0.246538	A0A024R4E5	A0A024R4E5_HUMAN	High density lipoprotein binding protein (Vigilin), isoform CRA_a (Vigilin)	HDLBP hCG_33048	HDLBP
14.4685	14.3571	14.4194	14.4793	13.6425	14.4323	sp		755	1184	14.1768	14.4229	-0.246152	O43719	HTSF1_HUMAN	HIV Tat-specific factor 1 (Tat-SF1)	HTATSF1	HTATSF1
16.8235	17.232	17.203	17.3644	17.0759	17.2441	sp		493	793	17.0341	17.2801	-0.246025	O95822	DCMC_HUMAN	Malonyl-CoA decarboxylase, mitochondrial (MCD) (EC 4.1.1.9)	MLYCD	MLYCD
16.4563	16.3412	15.6702	16.43	16.3905	16.4832	sp		385	1920	16.1724	16.4181	-0.245768	Q12824	SNF5_HUMAN	SWI/SNF-related matrix-associated actin-dependent regulator of chromatin subfamily B member 1 (BRG1-associated factor 47) (BAF47) (Integrase interactor 1 protein) (SNF5 homolog) (hSNF5)	SMARCB1 BAF47 INI1 SNF5L1	SMARCB1
13.262	13.4423	13.6581	13.7832	13.1536	13.5841	tr		597	2208	13.3579	13.6032	-0.245321	E7EWR4	E7EWR4_HUMAN	Cleavage stimulation factor subunit 2	CSTF2	CSTF2
19.8809	20.372	20.2771	20.3845	20.3095	20.4446	sp		644	388	20.1558	20.4004	-0.244526	P04264	K2C1_HUMAN	Keratin, type II cytoskeletal 1 (67 kDa cytokeratin) (Cytokeratin-1) (CK-1) (Hair alpha protein) (Keratin-1) (K1) (Type-II keratin Kb1)	KRT1 KRTA	KRT1
13.9374	14.5097	14.0178	14.1311	14.4832	14.5303	sp		647	2467	14.1461	14.3904	-0.244246	Q9UFC0	LRWD1_HUMAN	Leucine-rich repeat and WD repeat-containing protein 1 (Centromere protein 33) (CENP-33) (Origin recognition complex-associated protein) (ORC-associated protein) (ORCA)	LRWD1 CENP-33 ORCA	LRWD1
14.0117	14.3836	14.0038	14.3187	14.2617	14.3059	sp		592	924	14.0924	14.3361	-0.243667	O00186	STXB3_HUMAN	Syntaxin-binding protein 3 (Platelet Sec1 protein) (PSP) (Protein unc-18 homolog 3) (Unc18-3) (Protein unc-18 homolog C) (Unc-18C)	STXBP3	STXBP3
13.8269	14.3941	14.4016	14.2253	14.2241	14.563	sp		283	2127	14.1508	14.3941	-0.243275	Q99943	PLCA_HUMAN	1-acyl-sn-glycerol-3-phosphate acyltransferase alpha (EC 2.3.1.51) (1-acylglycerol-3-phosphate O-acyltransferase 1) (1-AGP acyltransferase 1) (1-AGPAT 1) (Lysophosphatidic acid acyltransferase alpha) (LPAAT-alpha) (Protein G15)	AGPAT1 G15	AGPAT1
20.8314	21.0431	20.7599	21.0181	20.742	21.0015	sp		377	401	20.7778	21.0209	-0.243156	Q16795	NDUA9_HUMAN	NADH dehydrogenase [ubiquinone] 1 alpha subcomplex subunit 9, mitochondrial (Complex I-39kD) (CI-39kD) (NADH-ubiquinone oxidoreductase 39 kDa subunit)	NDUFA9 NDUFS2L	NDUFA9
15.5059	15.7444	15.6763	15.7265	15.1502	15.5904	sp		218	1877	15.4442	15.6871	-0.242934	Q9UBQ5	EIF3K_HUMAN	Eukaryotic translation initiation factor 3 subunit K (eIF3k) (Eukaryotic translation initiation factor 3 subunit 12) (Muscle-specific gene M9 protein) (PLAC-24) (eIF-3 p25) (eIF-3 p28)	EIF3K EIF3S12 ARG134 HSPC029 MSTP001 PTD001	EIF3K
17.7064	18.2566	18.0375	18.1113	17.8935	17.9955	sp		906	458	17.8791	18.1211	-0.241989	P35606	COPB2_HUMAN	Coatomer subunit beta' (Beta'-coat protein) (Beta'-COP) (p102)	COPB2	COPB2
15.5963	15.7619	15.5757	15.917	15.6151	15.8341	sp		277	1390	15.5957	15.8377	-0.241979	P47756	CAPZB_HUMAN	F-actin-capping protein subunit beta (CapZ beta)	CAPZB	CAPZB
16.3583	16.3758	16.2863	16.5181	16.0078	16.4827	tr		518	860	16.2175	16.4589	-0.241398	M0QWZ7	M0QWZ7_HUMAN	Serine--tRNA ligase, mitochondrial (Seryl-tRNA synthetase 2, isoform CRA_d)	SARS2 hCG_20526	SARS2
19.4943	19.7884	19.5497	19.766	19.5419	19.7544	tr		252	972	19.5286	19.7696	-0.240944	E7EPT4	E7EPT4_HUMAN	NADH dehydrogenase [ubiquinone] flavoprotein 2, mitochondrial	NDUFV2	NDUFV2
17.2003	17.3447	17.1546	17.3518	17.0353	17.4158	tr		906	577	17.1301	17.3708	-0.240728	E9PEP6	E9PEP6_HUMAN	Neuropilin	NRP1	NRP1
14.6651	15.8602	15.7745	14.9247	15.2136	15.5891	sp		1375	1325	15.2177	15.458	-0.24027	Q8IY17	PLPL6_HUMAN	Neuropathy target esterase (EC 3.1.1.5) (Patatin-like phospholipase domain-containing protein 6)	PNPLA6 NTE	PNPLA6
15.3876	15.5689	15.5439	15.6924	15.6742	16.0651	sp		110	1665	15.5352	15.7755	-0.240225	P18077	RL35A_HUMAN	60S ribosomal protein L35a (Cell growth-inhibiting gene 33 protein) (Large ribosomal subunit protein eL33)	RPL35A GIG33	RPL35A
15.385	15.3257	14.5074	15.1933	15.0128	15.1066	tr		1698	788	14.9684	15.2085	-0.240117	A0A140TA49	A0A140TA49_HUMAN	Complement C4-A	C4A	C4A
18.9841	18.9654	18.7808	18.9518	18.4241	18.991	tr		8923	7	18.7296	18.9694	-0.239765	A6NGQ3	A6NGQ3_HUMAN	Obscurin	OBSCN	OBSCN
14.9576	15.1957	14.8761	15.0491	14.866	15.1726	sp		438	1682	14.8999	15.1392	-0.239252	Q92947	GCDH_HUMAN	Glutaryl-CoA dehydrogenase, mitochondrial (GCD) (EC 1.3.8.6)	GCDH	GCDH
15.4385	15.4443	14.8105	15.5974	14.6798	14.6048	sp		1859	773	14.9763	15.2155	-0.23925	Q92538	GBF1_HUMAN	Golgi-specific brefeldin A-resistance guanine nucleotide exchange factor 1 (BFA-resistant GEF 1)	GBF1 KIAA0248	GBF1
19.5676	19.4998	18.7947	18.8872	18.8232	19.5143	sp		218	957	19.0618	19.3004	-0.238569	Q15907	RB11B_HUMAN	Ras-related protein Rab-11B (GTP-binding protein YPT3)	RAB11B YPT3	RAB11B
17.2895	17.6265	17.4054	17.6443	17.4549	17.5943	sp		127	1954	17.3833	17.6217	-0.238426	P53999	TCP4_HUMAN	Activated RNA polymerase II transcriptional coactivator p15 (Positive cofactor 4) (PC4) (SUB1 homolog) (p14)	SUB1 PC4 RPO2TC1	SUB1
17.5347	17.6515	17.4493	17.6828	17.3915	17.7558	sp		183	1343	17.4585	17.6967	-0.238216	Q13185	CBX3_HUMAN	Chromobox protein homolog 3 (HECH) (Heterochromatin protein 1 homolog gamma) (HP1 gamma) (Modifier 2 protein)	CBX3	CBX3
17.8896	18.097	17.8184	18.0619	17.7809	18.0428	sp		482	532	17.8296	18.0672	-0.237602	P11182	ODB2_HUMAN	Lipoamide acyltransferase component of branched-chain alpha-keto acid dehydrogenase complex, mitochondrial (EC 2.3.1.168) (52 kDa mitochondrial autoantigen of primary biliary cirrhosis) (Branched chain 2-oxo-acid dehydrogenase complex component E2) (BCOADC-E2) (Branched-chain alpha-keto acid dehydrogenase complex component E2) (BCKAD-E2) (BCKADE2) (Dihydrolipoamide acetyltransferase component of …	DBT BCATE2	DBT
17.449	17.7372	17.4342	17.7079	17.5071	17.6542	sp		213	1946	17.4634	17.6998	-0.236345	O14735	CDIPT_HUMAN	CDP-diacylglycerol--inositol 3-phosphatidyltransferase (EC 2.7.8.11) (Phosphatidylinositol synthase) (PI synthase) (PtdIns synthase)	CDIPT PIS PIS1	CDIPT
18.3603	18.5883	18.3753	18.6107	18.3681	18.6135	tr		515	438	18.3679	18.6042	-0.236279	H3BRN4	H3BRN4_HUMAN	4-aminobutyrate aminotransferase, mitochondrial	ABAT	ABAT
17.9853	18.2847	18.0129	18.0704	17.8784	18.23	tr		550	404	17.9588	18.1951	-0.236238	E9PDR0	E9PDR0_HUMAN	Propionyl-CoA carboxylase beta chain, mitochondrial	PCCB	PCCB
14.7977	15.0818	14.8736	15.1971	15.0162	15.1118	sp		241	1430	14.8958	15.1302	-0.23439	O00299	CLIC1_HUMAN	Chloride intracellular channel protein 1 (Chloride channel ABP) (Nuclear chloride ion channel 27) (NCC27) (Regulatory nuclear chloride ion channel protein) (hRNCC)	CLIC1 G6 NCC27	CLIC1
16.65	17.2148	16.7739	16.8306	17.1155	17.1966	sp		528	1042	16.8465	17.0807	-0.234192	Q9H3P7	GCP60_HUMAN	Golgi resident protein GCP60 (Acyl-CoA-binding domain-containing protein 3) (Golgi complex-associated protein 1) (GOCAP1) (Golgi phosphoprotein 1) (GOLPH1) (PBR- and PKA-associated protein 7) (Peripheral benzodiazepine receptor-associated protein PAP7) [Cleaved into: Golgi resident protein GCP60, N-terminally processed]	ACBD3 GCP60 GOCAP1 GOLPH1	ACBD3
15.8083	16.0422	15.898	16.109	15.8061	16.0628	sp		455	2512	15.8375	16.0713	-0.23385	Q14728	MFS10_HUMAN	Major facilitator superfamily domain-containing protein 10 (Tetracycline transporter-like protein)	MFSD10 TETRAN	MFSD10
15.3059	15.6314	15.2716	15.4728	15.0426	15.2138	sp		113	2074	15.2067	15.4393	-0.232654	P63172	DYLT1_HUMAN	Dynein light chain Tctex-type 1 (Protein CW-1) (T-complex testis-specific protein 1 homolog)	DYNLT1 TCTEL1 TCTEX-1 TCTEX1	DYNLT1
14.3848	14.8159	14.9564	14.6457	13.0875	13.6634	sp		133	2066	14.1429	14.375	-0.232119	P62847	RS24_HUMAN	40S ribosomal protein S24 (Small ribosomal subunit protein eS24)	RPS24	RPS24
17.1914	17.295	15.9805	16.2333	16.9729	17.3122	sp		717	1446	16.7149	16.9468	-0.231894	Q12996	CSTF3_HUMAN	Cleavage stimulation factor subunit 3 (CF-1 77 kDa subunit) (Cleavage stimulation factor 77 kDa subunit) (CSTF 77 kDa subunit) (CstF-77)	CSTF3	CSTF3
13.2162	13.7112	13.2053	13.5124	13.8264	13.7139	tr		933	2365	13.416	13.6458	-0.229864	A0A0U1RQQ9	A0A0U1RQQ9_HUMAN	SCY1-like protein 2	SCYL2	SCYL2
18.1485	18.4018	18.1076	18.4015	18.2362	18.3772	sp		626	484	18.1641	18.3935	-0.229418	P43155	CACP_HUMAN	Carnitine O-acetyltransferase (Carnitine acetylase) (EC 2.3.1.7) (Carnitine acetyltransferase) (CAT) (CrAT)	CRAT CAT1	CRAT
20.682	20.9038	20.6586	20.9073	20.6946	20.9107	sp		359	521	20.6784	20.9073	-0.228863	P11177	ODPB_HUMAN	Pyruvate dehydrogenase E1 component subunit beta, mitochondrial (PDHE1-B) (EC 1.2.4.1)	PDHB PHE1B	PDHB
17.679	17.8811	17.5268	17.7886	17.7001	17.922	sp		645	403	17.6353	17.8639	-0.228592	Q6PI48	SYDM_HUMAN	Aspartate--tRNA ligase, mitochondrial (EC 6.1.1.12) (Aspartyl-tRNA synthetase) (AspRS)	DARS2	DARS2
16.7395	16.6968	16.2486	16.8398	16.613	16.75	sp		357	1294	16.5337	16.7622	-0.228539	Q96DI7	SNR40_HUMAN	U5 small nuclear ribonucleoprotein 40 kDa protein (U5 snRNP 40 kDa protein) (U5-40K) (38 kDa-splicing factor) (Prp8-binding protein) (hPRP8BP) (U5 snRNP-specific 40 kDa protein) (WD repeat-containing protein 57)	SNRNP40 PRP8BP SFP38 WDR57	SNRNP40
14.3571	14.9528	14.7504	14.689	14.57	14.7201	sp		148	2377	14.5592	14.7873	-0.228125	Q96A72	MGN2_HUMAN	Protein mago nashi homolog 2	MAGOHB MAGOH2	MAGOHB
14.4381	14.7746	15.0645	15.141	14.237	14.5078	tr		458	1164	14.5799	14.8078	-0.227945	A0A0A6YYJ8	A0A0A6YYJ8_HUMAN	Putative RNA-binding protein Luc7-like 2	LUC7L2	LUC7L2
11.8177	15.5992	11.7108	13.1236	15.6337	11.1199	sp		621	1865	13.0541	13.2809	-0.226864	Q9NVH0	EXD2_HUMAN	Exonuclease 3'-5' domain-containing protein 2 (EC 3.1.11.1) (3'-5' exoribonuclease EXD2) (EC 3.1.13.-) (Exonuclease 3'-5' domain-like-containing protein 2)	EXD2 C14orf114 EXDL2	EXD2
17.7021	18.1543	17.7944	18.2101	17.8238	17.6318	sp		923	289	17.7734	17.9988	-0.225334	Q8N163	CCAR2_HUMAN	Cell cycle and apoptosis regulator protein 2 (Cell division cycle and apoptosis regulator protein 2) (DBIRD complex subunit KIAA1967) (Deleted in breast cancer gene 1 protein) (DBC-1) (DBC.1) (NET35) (p30 DBC)	CCAR2 DBC1 KIAA1967	CCAR2
14.5741	15.4278	15.2652	15.3473	14.8541	14.5902	sp		1214	1337	14.8978	15.1218	-0.223968	Q9Y6M7	S4A7_HUMAN	Sodium bicarbonate cotransporter 3 (Electroneutral Na/HCO(3) cotransporter) (Sodium bicarbonate cotransporter 2) (Sodium bicarbonate cotransporter 2b) (Bicarbonate transporter) (Solute carrier family 4 member 7)	SLC4A7 BT NBC2 NBC2B NBC3 NBCn1 SBC2 SLC4A6	SLC4A7
18.342	18.5835	18.1717	18.5883	18.5784	18.5916	sp		455	994	18.364	18.5878	-0.223755	P07099	HYEP_HUMAN	Epoxide hydrolase 1 (EC 3.3.2.9) (Epoxide hydratase) (Microsomal epoxide hydrolase) (mEH)	EPHX1 EPHX EPOX	EPHX1
15.3009	15.545	15.474	15.5688	15.4965	15.8276	sp		538	2267	15.4238	15.6471	-0.223332	Q96KA5	CLP1L_HUMAN	Cleft lip and palate transmembrane protein 1-like protein (CLPTM1-like protein) (Cisplatin resistance-related protein 9) (CRR9p)	CLPTM1L CRR9	CLPTM1L
19.4381	19.6981	19.2928	19.5784	19.4634	19.5878	sp		679	153	19.3981	19.6214	-0.223331	P38646	GRP75_HUMAN	Stress-70 protein, mitochondrial (75 kDa glucose-regulated protein) (GRP-75) (Heat shock 70 kDa protein 9) (Mortalin) (MOT) (Peptide-binding protein 74) (PBP74)	HSPA9 GRP75 HSPA9B mt-HSP70	HSPA9
16.9696	17.3124	16.9953	17.332	17.3938	17.3827	sp		982	272	17.1196	17.3424	-0.22278	O60237-6	MYPT2_HUMAN	Protein phosphatase 1 regulatory subunit 12B (Myosin phosphatase-targeting subunit 2) (Myosin phosphatase target subunit 2)	PPP1R12B MYPT2	PPP1R12B
16.6441	17.0376	16.4098	16.7292	16.9531	16.9077	sp		388	1634	16.669	16.8915	-0.222477	Q8NFZ8	CADM4_HUMAN	Cell adhesion molecule 4 (Immunoglobulin superfamily member 4C) (IgSF4C) (Nectin-like protein 4) (NECL-4) (TSLC1-like protein 2)	CADM4 IGSF4C NECL4 TSLL2	CADM4
15.715	16.4711	16.3364	16.4494	16.545	16.3431	sp		178	1307	16.1988	16.4212	-0.222412	Q9BYD1	RM13_HUMAN	39S ribosomal protein L13, mitochondrial (L13mt) (MRP-L13) (Mitochondrial large ribosomal subunit protein uL13m)	MRPL13	MRPL13
19.006	19.3118	19.1118	19.161	18.9945	19.3061	sp		468	490	19.0375	19.2597	-0.22221	Q96HE7	ERO1A_HUMAN	ERO1-like protein alpha (ERO1-L) (ERO1-L-alpha) (EC 1.8.4.-) (Endoplasmic oxidoreductin-1-like protein) (Endoplasmic reticulum oxidoreductase alpha) (Oxidoreductin-1-L-alpha)	ERO1A ERO1L UNQ434/PRO865	ERO1A
19.0854	19.2183	18.9597	19.2454	19.0586	19.3064	sp		143	1669	19.0346	19.2567	-0.222158	P62266	RS23_HUMAN	40S ribosomal protein S23 (Small ribosomal subunit protein uS12)	RPS23	RPS23
13.2936	14.0536	14.2823	14.0232	14.1292	14.294	sp		380	2248	13.9017	14.1236	-0.221895	Q6DKK2	TTC19_HUMAN	Tetratricopeptide repeat protein 19, mitochondrial (TPR repeat protein 19)	TTC19	TTC19
20.4672	20.7451	20.4427	20.6849	20.494	20.6394	sp		325	794	20.468	20.6898	-0.221821	P08574	CY1_HUMAN	Cytochrome c1, heme protein, mitochondrial (Complex III subunit 4) (Complex III subunit IV) (Cytochrome b-c1 complex subunit 4) (Ubiquinol-cytochrome-c reductase complex cytochrome c1 subunit) (Cytochrome c-1)	CYC1	CYC1
18.4154	18.6271	18.4135	18.6648	18.4283	18.6303	tr		171	1424	18.4191	18.6407	-0.22168	J3QQT2	J3QQT2_HUMAN	60S ribosomal protein L17 (Fragment)	RPL17	RPL17
13.7681	14.1274	13.8585	14.0327	13.9746	14.1032	sp		254	2382	13.867	14.0878	-0.220743	Q9UMS0	NFU1_HUMAN	NFU1 iron-sulfur cluster scaffold homolog, mitochondrial (HIRA-interacting protein 5)	NFU1 HIRIP5 CGI-33	NFU1
19.0705	19.0289	18.9996	19.0009	18.9813	19.6827	sp		1048	122	19.0171	19.2375	-0.220345	P06756	ITAV_HUMAN	Integrin alpha-V (Vitronectin receptor) (Vitronectin receptor subunit alpha) (CD antigen CD51) [Cleaved into: Integrin alpha-V heavy chain;Integrin alpha-V light chain]	ITGAV MSK8 VNRA VTNR	ITGAV
18.5255	18.5801	18.3961	18.6497	18.2662	18.6168	sp		493	621	18.396	18.6155	-0.219578	Q16658	FSCN1_HUMAN	Fascin (55 kDa actin-bundling protein) (Singed-like protein) (p55)	FSCN1 FAN1 HSN SNL	FSCN1
19.6791	19.8843	19.6677	19.8888	19.6684	19.8986	sp		705	1053	19.6717	19.8905	-0.218821	P46977	STT3A_HUMAN	Dolichyl-diphosphooligosaccharide--protein glycosyltransferase subunit STT3A (Oligosaccharyl transferase subunit STT3A) (STT3-A) (EC 2.4.99.18) (B5) (Integral membrane protein 1) (Transmembrane protein TMC)	STT3A ITM1 TMC	STT3A
16.0265	16.3558	16.1879	16.3669	16.1651	16.3132	sp		526	1348	16.1265	16.3453	-0.218819	P35637	FUS_HUMAN	RNA-binding protein FUS (75 kDa DNA-pairing protein) (Oncogene FUS) (Oncogene TLS) (POMp75) (Translocated in liposarcoma protein)	FUS TLS	FUS
18.3304	18.5299	18.2822	18.5308	18.258	18.4657	sp		406	666	18.2902	18.5088	-0.218645	Q9BS26	ERP44_HUMAN	Endoplasmic reticulum resident protein 44 (ER protein 44) (ERp44) (Thioredoxin domain-containing protein 4)	ERP44 KIAA0573 TXNDC4 UNQ532/PRO1075	ERP44
16.5467	16.7961	16.5856	16.6436	16.4722	16.8204	sp		297	1486	16.5349	16.7534	-0.218512	Q14249	NUCG_HUMAN	Endonuclease G, mitochondrial (Endo G) (EC 3.1.30.-)	ENDOG	ENDOG
17.4022	17.7574	17.5765	17.5052	17.1835	17.5541	sp		621	308	17.3874	17.6055	-0.218151	Q9H845	ACAD9_HUMAN	Complex I assembly factor ACAD9, mitochondrial (Acyl-CoA dehydrogenase family member 9) (ACAD-9) (EC 1.3.8.-)	ACAD9	ACAD9
17.6319	17.8796	17.5847	17.8135	17.6223	17.7994	sp		203	1007	17.613	17.8308	-0.217848	P40429	RL13A_HUMAN	60S ribosomal protein L13a (23 kDa highly basic protein) (Large ribosomal subunit protein uL13)	RPL13A	RPL13A
22.0835	22.3066	22.0941	22.3257	22.0956	22.2933	sp		452	159	22.0911	22.3085	-0.21748	P48735	IDHP_HUMAN	Isocitrate dehydrogenase [NADP], mitochondrial (IDH) (EC 1.1.1.42) (ICD-M) (IDP) (NADP(+)-specific ICDH) (Oxalosuccinate decarboxylase)	IDH2	IDH2
16.4385	16.7473	16.4739	16.612	16.382	16.5872	sp		819	340	16.4315	16.6488	-0.217348	Q8N1F7	NUP93_HUMAN	Nuclear pore complex protein Nup93 (93 kDa nucleoporin) (Nucleoporin Nup93)	NUP93 KIAA0095	NUP93
16.1876	16.1634	16.1667	16.5825	16.2087	16.469	sp		486	1518	16.1877	16.405	-0.217291	Q96CU9	FXRD1_HUMAN	FAD-dependent oxidoreductase domain-containing protein 1 (EC 1.-.-.-)	FOXRED1 FP634	FOXRED1
18.1842	18.4787	18.3391	18.4316	18.2124	18.4768	sp		465	1161	18.2453	18.4623	-0.217079	O15427	MOT4_HUMAN	Monocarboxylate transporter 4 (MCT 4) (Solute carrier family 16 member 3)	SLC16A3 MCT4	SLC16A3
14.9922	15.1365	14.7595	15.0857	15.0492	15.2294	sp		305	1833	14.9336	15.1505	-0.216884	Q5T653	RM02_HUMAN	39S ribosomal protein L2, mitochondrial (L2mt) (MRP-L2) (Mitochondrial large ribosomal subunit protein uL2m)	MRPL2 CGI-22	MRPL2
15.1643	15.5103	15.4908	15.6759	15.4055	15.5205	sp		371	2658	15.3535	15.5689	-0.21533	Q8N357	S35F6_HUMAN	Solute carrier family 35 member F6 (ANT2-binding protein) (ANT2BP) (Transport and Golgi organization 9 homolog)	SLC35F6 C2orf18 UNQ3047/PRO9863	SLC35F6
18.0835	18.3289	18.0663	18.225	18.0682	18.3096	sp		439	396	18.0727	18.2878	-0.215155	Q9Y305	ACOT9_HUMAN	Acyl-coenzyme A thioesterase 9, mitochondrial (Acyl-CoA thioesterase 9) (EC 3.1.2.-) (Acyl-CoA thioester hydrolase 9)	ACOT9 CGI-16	ACOT9
18.1428	18.4639	18.2779	18.5286	18.3773	18.4507	sp		119	2212	18.266	18.4811	-0.215067	P60866	RS20_HUMAN	40S ribosomal protein S20 (Small ribosomal subunit protein uS10)	RPS20	RPS20
17.5394	17.546	17.0701	17.5109	17.4733	17.6697	tr		364	520	17.361	17.5755	-0.214567	A0A0C4DGA2	A0A0C4DGA2_HUMAN	Enoyl-CoA delta isomerase 2, mitochondrial (Testicular secretory protein Li 33)	ECI2	ECI2
12.9561	13.0369	11.5869	13.9669	13.8817	12.0642	sp		1239	2094	12.8082	13.0226	-0.214414	P54098	DPOG1_HUMAN	DNA polymerase subunit gamma-1 (EC 2.7.7.7) (Mitochondrial DNA polymerase catalytic subunit) (PolG-alpha)	POLG MDP1 POLG1 POLGA	POLG
15.1762	15.2907	14.961	15.3298	14.9563	15.116	tr		1478	442	15.0312	15.2455	-0.214328	F8WA11	F8WA11_HUMAN	CLIP-associating protein 1	CLASP1	CLASP1
15.3777	15.7021	15.5211	15.7596	15.5988	15.6787	tr		802	767	15.4992	15.7135	-0.214278	R4GMU1	R4GMU1_HUMAN	GDH/6PGL endoplasmic bifunctional protein	H6PD	H6PD
11.1503	13.0389	12.057	11.7243	11.8781	10.9647	sp		875	2654	11.6952	11.9093	-0.214176	Q96P47	AGAP3_HUMAN	Arf-GAP with GTPase, ANK repeat and PH domain-containing protein 3 (AGAP-3) (CRAM-associated GTPase) (CRAG) (Centaurin-gamma-3) (Cnt-g3) (MR1-interacting protein) (MRIP-1)	AGAP3 CENTG3	AGAP3
15.8157	15.7974	15.0809	15.7907	15.8161	15.7645	sp		1116	1147	15.5709	15.7842	-0.21327	Q9HAU0-6	PKHA5_HUMAN	Pleckstrin homology domain-containing family A member 5 (PH domain-containing family A member 5) (Phosphoinositol 3-phosphate-binding protein 2) (PEPP-2)	PLEKHA5 KIAA1686 PEPP2	PLEKHA5
14.2938	14.637	14.4296	14.5527	14.5061	14.6795	tr		323	2677	14.4098	14.6231	-0.213229	H7C0X4	H7C0X4_HUMAN	Dol-P-Man:Man(5)GlcNAc(2)-PP-Dol alpha-1,3-mannosyltransferase (EC 2.4.1.258) (Dol-P-Man-dependent alpha(1-3)-mannosyltransferase) (Fragment)	ALG3	ALG3
17.4074	17.1428	17.3663	17.2397	16.2591	17.2874	sp		968	436	17.011	17.2233	-0.212355	P49588	SYAC_HUMAN	Alanine--tRNA ligase, cytoplasmic (EC 6.1.1.7) (Alanyl-tRNA synthetase) (AlaRS) (Renal carcinoma antigen NY-REN-42)	AARS	AARS
19.7376	17.0009	16.6132	19.9865	19.7749	19.7745	sp		4544	81	18.7086	18.9206	-0.212004	Q07954	LRP1_HUMAN	Prolow-density lipoprotein receptor-related protein 1 (LRP-1) (Alpha-2-macroglobulin receptor) (A2MR) (Apolipoprotein E receptor) (APOER) (CD antigen CD91) [Cleaved into: Low-density lipoprotein receptor-related protein 1 85 kDa subunit (LRP-85);Low-density lipoprotein receptor-related protein 1 515 kDa subunit (LRP-515);Low-density lipoprotein receptor-related protein 1 intracellular domain (LRP…	LRP1 A2MR APR	LRP1
15.4229	15.7052	15.7744	15.8836	15.5217	15.762	sp		169	1725	15.573	15.7836	-0.210619	Q8N183	NDUF2_HUMAN	NADH dehydrogenase [ubiquinone] 1 alpha subcomplex assembly factor 2 (B17.2-like) (B17.2L) (Mimitin) (Myc-induced mitochondrial protein) (MMTN) (NDUFA12-like protein)	NDUFAF2 NDUFA12L	NDUFAF2
18.0812	18.1342	17.9743	18.3456	18.2706	18.478	sp		1382	97	18.1087	18.3193	-0.210558	Q14152	EIF3A_HUMAN	Eukaryotic translation initiation factor 3 subunit A (eIF3a) (Eukaryotic translation initiation factor 3 subunit 10) (eIF-3-theta) (eIF3 p167) (eIF3 p180) (eIF3 p185)	EIF3A EIF3S10 KIAA0139	EIF3A
18.6735	18.7516	18.2807	18.7254	18.6085	18.7161	sp		320	375	18.5209	18.731	-0.210163	P08758	ANXA5_HUMAN	Annexin A5 (Anchorin CII) (Annexin V) (Annexin-5) (Calphobindin I) (CBP-I) (Endonexin II) (Lipocortin V) (Placental anticoagulant protein 4) (PP4) (Placental anticoagulant protein I) (PAP-I) (Thromboplastin inhibitor) (Vascular anticoagulant-alpha) (VAC-alpha)	ANXA5 ANX5 ENX2 PP4	ANXA5
14.6412	14.8364	14.7886	15.1585	14.872	14.937	sp		423	795	14.7672	14.9773	-0.210028	P22830	HEMH_HUMAN	Ferrochelatase, mitochondrial (EC 4.99.1.1) (Heme synthase) (Protoheme ferro-lyase)	FECH	FECH
15.5568	15.8892	15.7909	15.8812	15.6041	15.8109	sp		260	2118	15.6506	15.8605	-0.209892	Q9BSF4	TIM29_HUMAN	Mitochondrial import inner membrane translocase subunit Tim29 (TIM29)	TIMM29 c19orf52	TIMM29
13.9537	14.0175	13.8834	14.0915	13.9887	14.3451	sp		410	1282	13.9419	14.1514	-0.209439	Q9NZA1-2	CLIC5_HUMAN	Chloride intracellular channel protein 5	CLIC5	CLIC5
16.3698	16.6388	16.3363	16.699	16.654	16.6496	sp		858	750	16.4534	16.6625	-0.209093	Q92598	HS105_HUMAN	Heat shock protein 105 kDa (Antigen NY-CO-25) (Heat shock 110 kDa protein)	HSPH1 HSP105 HSP110 KIAA0201	HSPH1
16.3407	16.521	16.3269	16.401	16.2211	16.5938	sp		1479	283	16.2962	16.5053	-0.209036	Q92626	PXDN_HUMAN	Peroxidasin homolog (EC 1.11.1.7) (Melanoma-associated antigen MG50) (Vascular peroxidase 1) (p53-responsive gene 2 protein)	PXDN KIAA0230 MG50 PRG2 VPO VPO1	PXDN
20.6161	20.8578	20.6609	20.8438	20.6764	20.8785	sp		430	195	20.6512	20.86	-0.208872	P00505	AATM_HUMAN	Aspartate aminotransferase, mitochondrial (mAspAT) (EC 2.6.1.1) (EC 2.6.1.7) (Fatty acid-binding protein) (FABP-1) (Glutamate oxaloacetate transaminase 2) (Kynurenine aminotransferase 4) (Kynurenine aminotransferase IV) (Kynurenine--oxoglutarate transaminase 4) (Kynurenine--oxoglutarate transaminase IV) (Plasma membrane-associated fatty acid-binding protein) (FABPpm) (Transaminase A)	GOT2	GOT2
17.0858	17.1608	16.6604	17.0899	17.1014	17.2233	sp		483	1262	16.9492	17.158	-0.208807	Q92599-2	SEPT8_HUMAN	Septin-8	SEPTIN8 KIAA0202 SEPT8	SEPTIN8
19.1299	19.1597	18.8555	19.2072	18.8951	19.1395	sp		732	318	18.9602	19.1688	-0.208614	P48449	ERG7_HUMAN	Lanosterol synthase (EC 5.4.99.7) (2,3-epoxysqualene--lanosterol cyclase) (Oxidosqualene--lanosterol cyclase) (OSC) (hOSC)	LSS OSC	LSS
17.17	17.7692	17.5781	17.6814	17.7685	17.691	sp		206	2142	17.5055	17.7139	-0.208332	P11233	RALA_HUMAN	Ras-related protein Ral-A	RALA RAL	RALA
17.1956	17.2411	17.3021	17.3566	17.0053	17.53	sp		2032	206	17.1676	17.3759	-0.208281	Q14008	CKAP5_HUMAN	Cytoskeleton-associated protein 5 (Colonic and hepatic tumor overexpressed gene protein) (Ch-TOG)	CKAP5 KIAA0097	CKAP5
16.7614	17.0046	16.595	16.8544	16.8705	16.9899	sp		765	786	16.7423	16.9496	-0.207336	P11387	TOP1_HUMAN	DNA topoisomerase 1 (EC 5.6.2.1) (DNA topoisomerase I)	TOP1	TOP1
17.708	17.9327	17.7865	17.9661	17.6726	17.8898	tr		618	1575	17.7224	17.9295	-0.207165	B0QYK0	B0QYK0_HUMAN	RNA-binding protein EWS	EWSR1	EWSR1
19.6557	19.9288	19.6148	19.9592	19.9416	19.9446	sp		541	185	19.7374	19.9442	-0.206818	P48643	TCPE_HUMAN	T-complex protein 1 subunit epsilon (TCP-1-epsilon) (CCT-epsilon)	CCT5 CCTE KIAA0098	CCT5
16.883	17.1455	16.983	17.1905	17.0139	17.1635	sp		423	798	16.96	17.1665	-0.206514	Q9BXW7	HDHD5_HUMAN	Haloacid dehalogenase-like hydrolase domain-containing 5 (Cat eye syndrome critical region protein 5)	HDHD5 CECR5	HDHD5
14.9937	15.1388	14.7448	15.0379	14.9594	15.1395	sp		293	2337	14.8993	15.1054	-0.206085	Q15800	MSMO1_HUMAN	Methylsterol monooxygenase 1 (EC 1.14.18.9) (C-4 methylsterol oxidase)	MSMO1 DESP4 ERG25 SC4MOL	MSMO1
19.2943	19.4365	19.1336	19.4467	19.253	19.4157	sp		539	280	19.227	19.433	-0.205994	P49419-2	AL7A1_HUMAN	Alpha-aminoadipic semialdehyde dehydrogenase (Alpha-AASA dehydrogenase) (EC 1.2.1.31) (Aldehyde dehydrogenase family 7 member A1) (EC 1.2.1.3) (Antiquitin-1) (Betaine aldehyde dehydrogenase) (EC 1.2.1.8) (Delta1-piperideine-6-carboxylate dehydrogenase) (P6c dehydrogenase)	ALDH7A1 ATQ1	ALDH7A1
15.1443	15.4481	15.1243	15.309	15.3137	15.4431	sp		229	1950	15.1941	15.4001	-0.20596	P09497-2	CLCB_HUMAN	Clathrin light chain B (Lcb)	CLTB	CLTB
15.5151	16.9404	17.4498	18.0107	18.2591	16.8864	sp		882	1658	17.0746	17.2792	-0.204567	P29590	PML_HUMAN	Protein PML (Promyelocytic leukemia protein) (RING finger protein 71) (Tripartite motif-containing protein 19)	PML MYL PP8675 RNF71 TRIM19	PML
18.8086	19.0782	18.8411	19.0807	19.035	19.1387	sp		1070	263	18.8949	19.0992	-0.204319	Q13308	PTK7_HUMAN	Inactive tyrosine-protein kinase 7 (Colon carcinoma kinase 4) (CCK-4) (Protein-tyrosine kinase 7) (Pseudo tyrosine kinase receptor 7) (Tyrosine-protein kinase-like 7)	PTK7 CCK4	PTK7
21.1904	21.4167	21.2145	21.4094	21.1988	21.3899	sp		727	117	21.2012	21.4054	-0.204117	P28331-2	NDUS1_HUMAN	NADH-ubiquinone oxidoreductase 75 kDa subunit, mitochondrial (EC 1.6.99.3) (EC 7.1.1.2) (Complex I-75kD) (CI-75kD)	NDUFS1	NDUFS1
18.0521	18.3138	18.169	18.312	18.0893	18.2959	tr		325	1120	18.1035	18.3073	-0.203756	A0A1P0AYU5	A0A1P0AYU5_HUMAN	Sidoreflexin	SFXN3	SFXN3
19.5794	19.7566	19.537	19.8046	19.6321	19.7975	sp		584	493	19.5828	19.7862	-0.203384	P13645	K1C10_HUMAN	Keratin, type I cytoskeletal 10 (Cytokeratin-10) (CK-10) (Keratin-10) (K10)	KRT10 KPP	KRT10
13.5832	12.8512	12.6785	14.077	14.2869	14.2299	sp		1724	2647	13.5162	13.7194	-0.20314	Q9UKK3	PARP4_HUMAN	Protein mono-ADP-ribosyltransferase PARP4 (EC 2.4.2.-) (193 kDa vault protein) (ADP-ribosyltransferase diphtheria toxin-like 4) (ARTD4) (PARP-related/IalphaI-related H5/proline-rich) (PH5P) (Poly [ADP-ribose] polymerase 4) (PARP-4) (Vault poly(ADP-ribose) polymerase) (VPARP)	PARP4 ADPRTL1 KIAA0177 PARPL	PARP4
16.5188	16.5218	16.2409	16.6422	16.3825	16.5851	sp		286	1150	16.3807	16.583	-0.202255	P47755	CAZA2_HUMAN	F-actin-capping protein subunit alpha-2 (CapZ alpha-2)	CAPZA2	CAPZA2
16.1435	16.5619	16.3054	16.5455	16.6062	16.5535	sp		217	1666	16.3517	16.5536	-0.201923	P62993	GRB2_HUMAN	Growth factor receptor-bound protein 2 (Adapter protein GRB2) (Protein Ash) (SH2/SH3 adapter GRB2)	GRB2 ASH	GRB2
15.0264	15.0309	14.8704	14.8887	14.6443	15.225	tr		786	1197	14.847	15.0482	-0.201178	A0A0U1RRL8	A0A0U1RRL8_HUMAN	Spermatogenesis-associated protein 20	SPATA20	SPATA20
14.6843	14.7314	14.6632	15.2281	14.9876	14.9777	sp		180	2130	14.7784	14.9791	-0.200668	Q9H0U6	RM18_HUMAN	39S ribosomal protein L18, mitochondrial (L18mt) (MRP-L18) (Mitochondrial large ribosomal subunit protein uL18m)	MRPL18 HSPC071	MRPL18
15.3258	15.3373	14.9722	15.1564	15.1073	15.5124	sp		305	1567	15.1351	15.3354	-0.200306	Q9GZS3	WDR61_HUMAN	WD repeat-containing protein 61 (Meiotic recombination REC14 protein homolog) (SKI8 homolog) (Ski8) [Cleaved into: WD repeat-containing protein 61, N-terminally processed]	WDR61	WDR61
14.949	15.3741	15.3676	15.4842	15.4364	15.4955	sp		334	1519	15.251	15.4513	-0.200261	P61964	WDR5_HUMAN	WD repeat-containing protein 5 (BMP2-induced 3-kb gene protein)	WDR5 BIG3	WDR5
17.3915	17.7211	17.5964	17.6751	17.5762	17.7685	sp		1179	147	17.5214	17.7216	-0.200239	Q92896-2	GSLG1_HUMAN	Golgi apparatus protein 1 (CFR-1) (Cysteine-rich fibroblast growth factor receptor) (E-selectin ligand 1) (ESL-1) (Golgi sialoglycoprotein MG-160)	GLG1 CFR1 ESL1 MG160	GLG1
14.4122	14.6828	14.3757	14.4924	14.6313	14.8446	sp		461	1916	14.4731	14.6733	-0.200212	O43294	TGFI1_HUMAN	Transforming growth factor beta-1-induced transcript 1 protein (Androgen receptor coactivator 55 kDa protein) (Androgen receptor-associated protein of 55 kDa) (Hydrogen peroxide-inducible clone 5 protein) (Hic-5)	TGFB1I1 ARA55	TGFB1I1
18.208	18.4693	18.2149	18.3925	18.2614	18.4225	tr		101	1411	18.2281	18.4281	-0.199997	C9JFR7	C9JFR7_HUMAN	Cytochrome c (Fragment)	CYCS	CYCS
15.5649	15.6878	15.5625	15.6502	14.5005	14.8894	sp		786	937	15.2093	15.4091	-0.199844	Q8IYB8	SUV3_HUMAN	ATP-dependent RNA helicase SUPV3L1, mitochondrial (EC 3.6.4.13) (Suppressor of var1 3-like protein 1) (SUV3-like protein 1)	SUPV3L1 SUV3	SUPV3L1
17.1651	17.4608	17.5306	17.4962	17.1726	17.5091	sp		468	1090	17.2894	17.4887	-0.199276	Q9Y2Z9-3	COQ6_HUMAN	Ubiquinone biosynthesis monooxygenase COQ6, mitochondrial (EC 1.14.13.-) (Coenzyme Q10 monooxygenase 6)	COQ6 CGI-10	COQ6
16.2279	16.3319	16.0788	16.3407	16.0125	16.244	sp		435	2289	16.1064	16.3055	-0.19912	Q9H490	PIGU_HUMAN	Phosphatidylinositol glycan anchor biosynthesis class U protein (Cell division cycle protein 91-like 1) (Protein CDC91-like 1) (GPI transamidase component PIG-U)	PIGU CDC91L1 PSEC0205 UNQ3055/PRO9875	PIGU
18.7402	18.939	18.6672	18.937	18.5991	18.7271	tr		186	1707	18.6688	18.8677	-0.198856	Q5T8U5	Q5T8U5_HUMAN	Surfeit 4 (Surfeit locus protein 4)	SURF4 RP11-244N20.4-004	SURF4
15.9207	16.2026	16.1181	16.2199	16.0169	16.2295	sp		406	524	16.0186	16.2173	-0.198738	P60842	IF4A1_HUMAN	Eukaryotic initiation factor 4A-I (eIF-4A-I) (eIF4A-I) (EC 3.6.4.13) (ATP-dependent RNA helicase eIF4A-1)	EIF4A1 DDX2A EIF4A	EIF4A1
19.5582	19.7541	19.5337	19.7511	19.5783	19.7609	tr		114	1201	19.5567	19.7554	-0.198652	E5RI99	E5RI99_HUMAN	60S ribosomal protein L30 (Fragment)	RPL30	RPL30
16.4007	16.5639	16.2664	16.5606	16.4213	16.5597	sp		2472	2281	16.3628	16.5614	-0.198557	Q13813-3	SPTN1_HUMAN	Spectrin alpha chain, non-erythrocytic 1 (Alpha-II spectrin) (Fodrin alpha chain) (Spectrin, non-erythroid alpha subunit)	SPTAN1 NEAS SPTA2	SPTAN1
15.6152	15.9528	15.8278	15.9343	15.8348	15.9843	sp		696	1105	15.7593	15.9572	-0.19788	O00461	GOLI4_HUMAN	Golgi integral membrane protein 4 (Golgi integral membrane protein, cis) (GIMPc) (Golgi phosphoprotein 4) (Golgi-localized phosphoprotein of 130 kDa) (Golgi phosphoprotein of 130 kDa)	GOLIM4 GIMPC GOLPH4 GPP130	GOLIM4
15.6043	15.9405	16.0182	16.1044	15.9581	16.1289	sp		1059	931	15.8602	16.0579	-0.197739	Q6JQN1	ACD10_HUMAN	Acyl-CoA dehydrogenase family member 10 (ACAD-10) (EC 1.3.99.-)	ACAD10	ACAD10
17.2783	17.6407	17.5011	17.625	17.5986	17.7049	sp		772	620	17.4594	17.6569	-0.197498	Q92523	CPT1B_HUMAN	Carnitine O-palmitoyltransferase 1, muscle isoform (CPT1-M) (EC 2.3.1.21) (Carnitine O-palmitoyltransferase I, muscle isoform) (CPT I) (CPTI-M) (Carnitine palmitoyltransferase 1B) (Carnitine palmitoyltransferase I-like protein)	CPT1B KIAA1670	CPT1B
17.6037	17.5379	17.4352	17.5752	17.0936	17.6096	sp		826	772	17.3775	17.5742	-0.196741	Q8TCJ2	STT3B_HUMAN	Dolichyl-diphosphooligosaccharide--protein glycosyltransferase subunit STT3B (Oligosaccharyl transferase subunit STT3B) (STT3-B) (EC 2.4.99.18) (Source of immunodominant MHC-associated peptides homolog)	STT3B SIMP	STT3B
19.9701	20.1868	19.9987	20.1928	20.0425	20.2206	sp		492	1190	20.0038	20.2	-0.196293	P11166	GTR1_HUMAN	Solute carrier family 2, facilitated glucose transporter member 1 (Glucose transporter type 1, erythrocyte/brain) (GLUT-1) (HepG2 glucose transporter)	SLC2A1 GLUT1	SLC2A1
15.0253	15.0804	14.8032	15.054	14.887	15.1695	sp		215	2192	14.9052	15.1013	-0.196116	P20339	RAB5A_HUMAN	Ras-related protein Rab-5A	RAB5A RAB5	RAB5A
16.9405	17.1532	16.8718	17.0057	16.8633	17.1041	sp		915	1076	16.8919	17.0877	-0.195797	Q6ZXV5	TMTC3_HUMAN	Protein O-mannosyl-transferase TMTC3 (EC 2.4.1.109) (Protein SMILE) (Transmembrane and TPR repeat-containing protein 3)	TMTC3	TMTC3
15.6594	15.5684	15.5625	16.0782	15.4221	15.584	sp		963	687	15.548	15.7435	-0.195572	Q15020	SART3_HUMAN	Squamous cell carcinoma antigen recognized by T-cells 3 (SART-3) (Tat-interacting protein of 110 kDa) (Tip110) (p110 nuclear RNA-binding protein)	SART3 KIAA0156 TIP110	SART3
19.1944	19.5023	19.2359	19.3575	19.2432	19.397	sp		910	125	19.2245	19.4189	-0.194414	Q7KZF4	SND1_HUMAN	Staphylococcal nuclease domain-containing protein 1 (EC 3.1.31.1) (100 kDa coactivator) (EBNA2 coactivator p100) (Tudor domain-containing protein 11) (p100 co-activator)	SND1 TDRD11	SND1
21.6627	21.8639	21.6648	21.8872	21.704	21.8625	sp		256	627	21.6772	21.8712	-0.193977	P30048	PRDX3_HUMAN	Thioredoxin-dependent peroxide reductase, mitochondrial (EC 1.11.1.15) (Antioxidant protein 1) (AOP-1) (HBC189) (Peroxiredoxin III) (Prx-III) (Peroxiredoxin-3) (Protein MER5 homolog)	PRDX3 AOP1	PRDX3
16.4509	16.633	16.518	16.7132	16.561	16.7649	sp		1411	53	16.51	16.7037	-0.193682	Q15075	EEA1_HUMAN	Early endosome antigen 1 (Endosome-associated protein p162) (Zinc finger FYVE domain-containing protein 2)	EEA1 ZFYVE2	EEA1
18.804	18.9453	18.5814	18.6798	18.6349	18.9731	sp		645	136	18.6734	18.866	-0.192602	P13667	PDIA4_HUMAN	Protein disulfide-isomerase A4 (EC 5.3.4.1) (Endoplasmic reticulum resident protein 70) (ER protein 70) (ERp70) (Endoplasmic reticulum resident protein 72) (ER protein 72) (ERp-72) (ERp72)	PDIA4 ERP70 ERP72	PDIA4
19.0739	19.1388	18.9665	19.2247	19.0235	19.2773	sp		1224	120	19.0213	19.2136	-0.19231	P53621	COPA_HUMAN	Coatomer subunit alpha (Alpha-coat protein) (Alpha-COP) (HEP-COP) (HEPCOP) [Cleaved into: Xenin (Xenopsin-related peptide);Proxenin]	COPA	COPA
15.575	15.0273	13.4626	15.7636	15.5237	14.346	sp		496	1595	14.8538	15.0456	-0.191825	P42785	PCP_HUMAN	Lysosomal Pro-X carboxypeptidase (EC 3.4.16.2) (Angiotensinase C) (Lysosomal carboxypeptidase C) (Proline carboxypeptidase) (Prolylcarboxypeptidase) (PRCP)	PRCP PCP	PRCP
17.0179	17.0088	17.0053	16.9079	16.9581	17.6391	tr		7555	14	16.9938	17.1853	-0.191523	H3BPE1	H3BPE1_HUMAN	Microtubule-actin cross-linking factor 1, isoforms 1/2/3/5	MACF1	MACF1
17.3935	17.5991	17.4308	17.6562	17.4322	17.5753	sp		414	738	17.4188	17.6102	-0.191341	O75874	IDHC_HUMAN	Isocitrate dehydrogenase [NADP] cytoplasmic (IDH) (EC 1.1.1.42) (Cytosolic NADP-isocitrate dehydrogenase) (IDP) (NADP(+)-specific ICDH) (Oxalosuccinate decarboxylase)	IDH1 PICD	IDH1
16.5125	16.5547	16.4187	16.6352	16.2823	16.5971	tr		601	1503	16.4045	16.5957	-0.191204	A0A0G2JJD3	A0A0G2JJD3_HUMAN	HLA-B associated transcript 5, isoform CRA_b (Phosphatidylserine lipase ABHD16A)	ABHD16A BAT5 hCG_43724	ABHD16A
18.3702	18.3767	17.976	18.4133	18.2123	18.3422	sp		501	567	18.1862	18.3774	-0.191191	O00330	ODPX_HUMAN	Pyruvate dehydrogenase protein X component, mitochondrial (Dihydrolipoamide dehydrogenase-binding protein of pyruvate dehydrogenase complex) (E3-binding protein) (E3BP) (Lipoyl-containing pyruvate dehydrogenase complex component X) (proX)	PDHX PDX1	PDHX
18.3553	18.4475	18.3637	18.5238	18.0486	18.3693	sp		412	636	18.2559	18.4468	-0.190996	P16219	ACADS_HUMAN	Short-chain specific acyl-CoA dehydrogenase, mitochondrial (SCAD) (EC 1.3.8.1) (Butyryl-CoA dehydrogenase)	ACADS	ACADS
15.7887	15.8218	15.7548	15.7192	15.4258	16.0011	sp		638	547	15.6564	15.8474	-0.190912	Q13409-3	DC1I2_HUMAN	Cytoplasmic dynein 1 intermediate chain 2 (Cytoplasmic dynein intermediate chain 2) (Dynein intermediate chain 2, cytosolic) (DH IC-2)	DYNC1I2 DNCI2 DNCIC2	DYNC1I2
15.6095	15.8013	15.923	16.0225	15.9586	16.2387	tr		393	1611	15.8304	16.0208	-0.190469	B4DGM3	B4DGM3_HUMAN	SWI/SNF-related matrix-associated actin-dependent regulator of chromatin subfamily E member 1 (cDNA FLJ55202, highly similar to SWI/SNF-related matrix-associatedactin-dependent regulator of chromatin subfamily E member 1)	SMARCE1	SMARCE1
18.0538	18.2352	18.2361	18.2919	17.8926	18.2254	sp		1383	275	18.0609	18.2508	-0.189968	Q8WX93	PALLD_HUMAN	Palladin (SIH002) (Sarcoma antigen NY-SAR-77)	PALLD KIAA0992 CGI-151	PALLD
17.6093	17.7804	17.7572	17.7831	17.5318	17.9034	sp		727	193	17.6328	17.8223	-0.189507	Q02809	PLOD1_HUMAN	Procollagen-lysine,2-oxoglutarate 5-dioxygenase 1 (EC 1.14.11.4) (Lysyl hydroxylase 1) (LH1)	PLOD1 LLH PLOD	PLOD1
18.3499	18.573	18.3353	18.4968	18.2209	18.4046	sp		227	702	18.302	18.4915	-0.189465	Q9UIJ7	KAD3_HUMAN	GTP:AMP phosphotransferase AK3, mitochondrial (EC 2.7.4.10) (Adenylate kinase 3) (AK 3) (Adenylate kinase 3 alpha-like 1)	AK3 AK3L1 AK6 AKL3L	AK3
19.6892	19.9269	19.7124	19.8938	19.7452	19.8935	sp		294	563	19.7156	19.9047	-0.189152	P45880	VDAC2_HUMAN	Voltage-dependent anion-selective channel protein 2 (VDAC-2) (hVDAC2) (Outer mitochondrial membrane protein porin 2)	VDAC2	VDAC2
17.0235	17.2759	16.7052	17.0321	17.038	17.024	sp		205	1711	16.9222	17.1107	-0.188448	P17081	RHOQ_HUMAN	Rho-related GTP-binding protein RhoQ (Ras-like protein TC10) (Ras-like protein family member 7A)	RHOQ ARHQ RASL7A TC10	RHOQ
18.2129	18.3715	18.1414	18.4178	18.1431	18.2724	sp		129	1545	18.1658	18.3539	-0.188091	O95168	NDUB4_HUMAN	NADH dehydrogenase [ubiquinone] 1 beta subcomplex subunit 4 (Complex I-B15) (CI-B15) (NADH-ubiquinone oxidoreductase B15 subunit)	NDUFB4	NDUFB4
15.3532	15.7416	15.529	15.698	15.8243	15.831	sp		669	1434	15.5688	15.7569	-0.188033	O00178	GTPB1_HUMAN	GTP-binding protein 1 (G-protein 1) (GP-1) (GP1)	GTPBP1	GTPBP1
17.4823	17.602	17.5722	17.7229	17.262	17.5552	sp		215	1225	17.4388	17.6267	-0.187923	P09429	HMGB1_HUMAN	High mobility group protein B1 (High mobility group protein 1) (HMG-1)	HMGB1 HMG1	HMGB1
14.0223	14.9831	15.1541	14.9687	15.1796	14.9676	sp		673	961	14.7853	14.9731	-0.187799	P51116	FXR2_HUMAN	Fragile X mental retardation syndrome-related protein 2	FXR2 FMR1L2	FXR2
18.8332	18.9654	18.8248	18.976	18.6359	18.9141	sp		215	1239	18.7646	18.9518	-0.187241	O75396	SC22B_HUMAN	Vesicle-trafficking protein SEC22b (ER-Golgi SNARE of 24 kDa) (ERS-24) (ERS24) (SEC22 vesicle-trafficking protein homolog B) (SEC22 vesicle-trafficking protein-like 1)	SEC22B SEC22L1	SEC22B
15.6835	15.7713	15.5277	15.8771	15.6926	15.8148	sp		136	2689	15.6346	15.8211	-0.18646	Q8N6L1	KTAP2_HUMAN	Keratinocyte-associated protein 2 (KCP-2) (Dolichyl-diphosphooligosaccharide--protein glycosyltransferase subunit KCP2) (Oligosaccharyl transferase subunit KCP2)	KRTCAP2 KCP2	KRTCAP2
16.1862	16.0556	15.8076	16.3362	16.0883	16.2494	sp		258	1731	16.0274	16.2137	-0.186337	O75822	EIF3J_HUMAN	Eukaryotic translation initiation factor 3 subunit J (eIF3j) (Eukaryotic translation initiation factor 3 subunit 1) (eIF-3-alpha) (eIF3 p35)	EIF3J EIF3S1 PRO0391	EIF3J
14.6784	15.0809	15.0493	14.9353	14.8609	15.1306	sp		433	1285	14.8629	15.049	-0.186107	Q52LJ0	FA98B_HUMAN	Protein FAM98B	FAM98B	FAM98B
18.4839	18.7817	18.5347	18.6919	18.6105	18.7132	sp		261	487	18.543	18.729	-0.185911	Q99714	HCD2_HUMAN	3-hydroxyacyl-CoA dehydrogenase type-2 (EC 1.1.1.35) (17-beta-hydroxysteroid dehydrogenase 10) (17-beta-HSD 10) (EC 1.1.1.51) (2-methyl-3-hydroxybutyryl-CoA dehydrogenase) (MHBD) (3-hydroxy-2-methylbutyryl-CoA dehydrogenase) (EC 1.1.1.178) (3-hydroxyacyl-CoA dehydrogenase type II) (Endoplasmic reticulum-associated amyloid beta-peptide-binding protein) (Mitochondrial ribonuclease P protein 2) (Mit…	HSD17B10 ERAB HADH2 MRPP2 SCHAD SDR5C1 XH98G2	HSD17B10
16.0269	16.2815	16.0289	16.1382	16	16.1911	tr		170	2169	16.0186	16.2036	-0.185013	K7ELQ9	K7ELQ9_HUMAN	Transmembrane protein 205 (Fragment)	TMEM205	TMEM205
15.31	15.7327	15.9501	15.9324	15.8489	15.9983	tr		185	2003	15.703	15.8878	-0.184805	K7EN02	K7EN02_HUMAN	Troponin I, cardiac muscle	TNNI3	TNNI3
16.0318	15.9919	15.8202	15.9905	15.5956	16.0181	tr		1032	585	15.8159	16.0002	-0.184258	A0A0C4DG89	A0A0C4DG89_HUMAN	Probable ATP-dependent RNA helicase DDX46	DDX46	DDX46
16.5767	16.8148	16.6416	16.8466	16.6955	16.7992	sp		394	1415	16.6379	16.8202	-0.182268	P61160	ARP2_HUMAN	Actin-related protein 2 (Actin-like protein 2)	ACTR2 ARP2	ACTR2
15.4742	16.4787	16.4231	16.4831	16.5703	16.0526	sp		1078	324	16.1559	16.3381	-0.182234	Q9Y4D1	DAAM1_HUMAN	Disheveled-associated activator of morphogenesis 1	DAAM1 KIAA0666	DAAM1
15.2362	15.3935	15.0269	15.3483	15.2394	15.3069	sp		1118	1099	15.1675	15.3496	-0.182016	Q14126	DSG2_HUMAN	Desmoglein-2 (Cadherin family member 5) (HDGC)	DSG2 CDHF5	DSG2
20.2688	20.2671	20.271	20.3413	19.8725	20.35	tr		454	418	20.1374	20.3194	-0.182014	Q5T4U5	Q5T4U5_HUMAN	Acyl-Coenzyme A dehydrogenase, C-4 to C-12 straight chain, isoform CRA_a (Medium-chain-specific acyl-CoA dehydrogenase, mitochondrial)	ACADM hCG_22915	ACADM
15.6104	15.8389	15.6175	15.7895	15.7173	15.8616	sp		926	330	15.6484	15.83	-0.181581	Q9UDR5	AASS_HUMAN	Alpha-aminoadipic semialdehyde synthase, mitochondrial (LKR/SDH) [Includes: Lysine ketoglutarate reductase (LKR) (LOR) (EC 1.5.1.8);Saccharopine dehydrogenase (SDH) (EC 1.5.1.9)]	AASS	AASS
20.687	20.8814	20.656	20.8576	20.6941	20.8408	sp		508	130	20.679	20.8599	-0.180876	P07237	PDIA1_HUMAN	Protein disulfide-isomerase (PDI) (EC 5.3.4.1) (Cellular thyroid hormone-binding protein) (Prolyl 4-hydroxylase subunit beta) (p55)	P4HB ERBA2L PDI PDIA1 PO4DB	P4HB
18.3666	18.5304	18.3359	18.5074	18.3456	18.5519	sp		906	46	18.3493	18.5299	-0.180563	P35221	CTNA1_HUMAN	Catenin alpha-1 (Alpha E-catenin) (Cadherin-associated protein) (Renal carcinoma antigen NY-REN-13)	CTNNA1	CTNNA1
19.8064	19.978	19.7654	19.9628	19.7919	19.9637	sp		463	321	19.7879	19.9682	-0.18025	O75306	NDUS2_HUMAN	NADH dehydrogenase [ubiquinone] iron-sulfur protein 2, mitochondrial (EC 1.6.99.3) (EC 7.1.1.2) (Complex I-49kD) (CI-49kD) (NADH-ubiquinone oxidoreductase 49 kDa subunit)	NDUFS2	NDUFS2
15.2373	15.5749	15.5947	15.5562	15.4474	15.6861	sp		354	1255	15.4265	15.6058	-0.179279	P08754	GNAI3_HUMAN	Guanine nucleotide-binding protein G(i) subunit alpha (G(i) alpha-3)	GNAI3	GNAI3
17.6326	17.8936	17.5815	17.6148	17.7992	18.0378	sp		523	1871	17.6711	17.8487	-0.177635	Q9UI10	EI2BD_HUMAN	Translation initiation factor eIF-2B subunit delta (eIF-2B GDP-GTP exchange factor subunit delta)	EIF2B4 EIF2BD	EIF2B4
16.7944	17.001	16.8723	16.989	16.8095	17.019	sp		192	2141	16.8254	17.003	-0.177605	P17152	TMM11_HUMAN	Transmembrane protein 11, mitochondrial (Protein PM1) (Protein PMI)	TMEM11 C17orf35 PM1	TMEM11
17.8147	17.9793	17.8766	17.8125	17.6506	18.0799	sp		623	710	17.7806	17.9573	-0.176626	P35527	K1C9_HUMAN	Keratin, type I cytoskeletal 9 (Cytokeratin-9) (CK-9) (Keratin-9) (K9)	KRT9	KRT9
17.7241	17.9288	17.7325	17.9535	17.7445	17.8484	sp		3396	817	17.7337	17.9102	-0.176519	P13611	CSPG2_HUMAN	Versican core protein (Chondroitin sulfate proteoglycan core protein 2) (Chondroitin sulfate proteoglycan 2) (Glial hyaluronate-binding protein) (GHAP) (Large fibroblast proteoglycan) (PG-M)	VCAN CSPG2	VCAN
16.9218	17.1009	16.8068	17.1296	17.1495	17.1758	sp		285	852	16.9594	17.1354	-0.176092	Q9NPL8	TIDC1_HUMAN	Complex I assembly factor TIMMDC1, mitochondrial (Protein M5-14) (Translocase of inner mitochondrial membrane domain-containing protein 1) (TIMM domain containing-protein 1)	TIMMDC1 C3orf1 UNQ247/PRO284	TIMMDC1
12.2907	12.9206	15.2369	15.6846	14.694	14.1439	tr		164	2291	14.0739	14.2497	-0.175805	A0A087X1G7	A0A087X1G7_HUMAN	Selenoprotein F	SELENOF	SELENOF
17.7324	17.986	17.7746	17.9853	17.802	17.865	sp		297	883	17.7697	17.9454	-0.175751	P46777	RL5_HUMAN	60S ribosomal protein L5 (Large ribosomal subunit protein uL18)	RPL5 MSTP030	RPL5
18.6565	18.8852	18.7327	18.8576	18.7021	18.8745	tr		374	654	18.6971	18.8724	-0.175346	A0A1B0GW68	A0A1B0GW68_HUMAN	Acid ceramidase	ASAH1	ASAH1
16.8359	17.0255	16.8266	17.0259	16.8868	17.0233	sp		327	511	16.8498	17.0249	-0.175156	P62140	PP1B_HUMAN	Serine/threonine-protein phosphatase PP1-beta catalytic subunit (PP-1B) (PPP1CD) (EC 3.1.3.16) (EC 3.1.3.53)	PPP1CB	PPP1CB
18.3552	18.45	18.327	18.5242	18.294	18.5268	sp		86	1515	18.3254	18.5003	-0.174948	P14854	CX6B1_HUMAN	Cytochrome c oxidase subunit 6B1 (Cytochrome c oxidase subunit VIb isoform 1) (COX VIb-1)	COX6B1 COX6B	COX6B1
21.5205	21.6993	21.5372	21.749	21.5735	21.7072	sp		803	41	21.5438	21.7185	-0.174723	P14625	ENPL_HUMAN	Endoplasmin (94 kDa glucose-regulated protein) (GRP-94) (Heat shock protein 90 kDa beta member 1) (Tumor rejection antigen 1) (gp96 homolog)	HSP90B1 GRP94 TRA1	HSP90B1
15.142	15.2342	15.0094	15.3385	15.0152	15.1171	sp		262	2567	15.0555	15.23	-0.174414	Q86VU5	CMTD1_HUMAN	Catechol O-methyltransferase domain-containing protein 1 (EC 2.1.1.-)	COMTD1 UNQ766/PRO1558	COMTD1
19.1433	19.3199	19.1191	19.3189	19.1647	19.3112	sp		553	570	19.1424	19.3167	-0.174292	Q5SSJ5	HP1B3_HUMAN	Heterochromatin protein 1-binding protein 3 (Protein HP1-BP74)	HP1BP3	HP1BP3
16.1498	16.1908	16.2691	16.2225	15.6946	16.2228	sp		322	1776	16.0378	16.212	-0.174219	P55735	SEC13_HUMAN	Protein SEC13 homolog (GATOR complex protein SEC13) (SEC13-like protein 1) (SEC13-related protein)	SEC13 D3S1231E SEC13A SEC13L1 SEC13R	SEC13
20.2709	20.4464	20.2417	20.4228	20.2557	20.4216	sp		631	311	20.2561	20.4303	-0.17415	P04844	RPN2_HUMAN	Dolichyl-diphosphooligosaccharide--protein glycosyltransferase subunit 2 (Dolichyl-diphosphooligosaccharide--protein glycosyltransferase 63 kDa subunit) (RIBIIR) (Ribophorin II) (RPN-II) (Ribophorin-2)	RPN2	RPN2
15.2446	15.1266	14.6796	15.2191	15.087	15.1879	sp		297	1460	15.0038	15.1779	-0.174084	P25325-2	THTM_HUMAN	3-mercaptopyruvate sulfurtransferase (MST) (EC 2.8.1.2)	MPST TST2	MPST
14.9847	15.2776	15.058	15.1325	15.0007	15.1524	sp		123	2474	15.0145	15.1875	-0.173071	Q9BRA2	TXD17_HUMAN	Thioredoxin domain-containing protein 17 (14 kDa thioredoxin-related protein) (TRP14) (Protein 42-9-9) (Thioredoxin-like protein 5)	TXNDC17 TXNL5	TXNDC17
17.2515	17.206	17.3067	18.0421	17.5121	17.339	sp		350	822	17.3567	17.529	-0.172279	Q9Y3F4-2	STRAP_HUMAN	Serine-threonine kinase receptor-associated protein (MAP activator with WD repeats) (UNR-interacting protein) (WD-40 repeat protein PT-WD)	STRAP MAWD UNRIP	STRAP
14.0813	14.3347	14.043	14.2572	14.1252	14.1698	sp		180	2273	14.0832	14.2539	-0.170729	P84085	ARF5_HUMAN	ADP-ribosylation factor 5	ARF5	ARF5
16.7596	16.8924	16.9047	17.015	16.5326	16.8016	sp		773	1193	16.7323	16.903	-0.170719	P50416	CPT1A_HUMAN	Carnitine O-palmitoyltransferase 1, liver isoform (CPT1-L) (EC 2.3.1.21) (Carnitine O-palmitoyltransferase I, liver isoform) (CPT I) (CPTI-L) (Carnitine palmitoyltransferase 1A)	CPT1A CPT1	CPT1A
16.1005	16.4386	16.3221	16.3313	16.2238	16.3878	sp		925	712	16.2155	16.3859	-0.170408	P57740	NU107_HUMAN	Nuclear pore complex protein Nup107 (107 kDa nucleoporin) (Nucleoporin Nup107)	NUP107	NUP107
15.0175	15.6182	15.4726	14.7462	14.8078	15.4438	sp		2376	548	15.0993	15.2694	-0.170072	A5YKK6	CNOT1_HUMAN	CCR4-NOT transcription complex subunit 1 (CCR4-associated factor 1) (Negative regulator of transcription subunit 1 homolog) (NOT1H) (hNOT1)	CNOT1 CDC39 KIAA1007 NOT1 AD-005	CNOT1
15.1548	15.3311	15.1392	15.4625	15.3898	15.4	sp		284	1999	15.2279	15.3979	-0.16995	Q9UBV8	PEF1_HUMAN	Peflin (PEF protein with a long N-terminal hydrophobic domain) (Penta-EF hand domain-containing protein 1)	PEF1 ABP32 UNQ1845/PRO3573	PEF1
11.4214	13.4035	13.4556	13.0673	13.8654	12.7813	sp		657	2629	12.9142	13.0841	-0.1699	Q9Y2V7	COG6_HUMAN	Conserved oligomeric Golgi complex subunit 6 (COG complex subunit 6) (Component of oligomeric Golgi complex 6)	COG6 KIAA1134	COG6
15.8464	15.6561	15.6175	16.146	15.8834	16.0549	sp		783	573	15.7824	15.9523	-0.169888	Q8TCS8	PNPT1_HUMAN	Polyribonucleotide nucleotidyltransferase 1, mitochondrial (EC 2.7.7.8) (3'-5' RNA exonuclease OLD35) (PNPase old-35) (Polynucleotide phosphorylase 1) (PNPase 1) (Polynucleotide phosphorylase-like protein)	PNPT1 PNPASE	PNPT1
13.4901	12.9187	15.2063	15.2646	15.4481	16.4699	sp		258	1752	14.7148	14.8844	-0.169574	O95336	6PGL_HUMAN	6-phosphogluconolactonase (6PGL) (EC 3.1.1.31)	PGLS	PGLS
19.8693	20.0725	19.9162	20.0516	19.8901	20.0589	sp		148	1312	19.8919	20.061	-0.169155	Q04837	SSBP_HUMAN	Single-stranded DNA-binding protein, mitochondrial (Mt-SSB) (MtSSB) (PWP1-interacting protein 17)	SSBP1 SSBP	SSBP1
16.6833	16.8791	16.744	16.8408	16.7461	16.9604	sp		379	1223	16.7245	16.8934	-0.168978	Q86WV6	STING_HUMAN	Stimulator of interferon genes protein (hSTING) (Endoplasmic reticulum interferon stimulator) (ERIS) (Mediator of IRF3 activation) (hMITA) (Transmembrane protein 173)	TMEM173 ERIS MITA STING	TMEM173
17.1061	17.1952	17.1086	17.1722	16.8616	17.214	sp		1267	210	17.0254	17.1938	-0.168352	Q5JPE7	NOMO2_HUMAN	Nodal modulator 2 (pM5 protein 2)	NOMO2	NOMO2
16.8589	17.0759	16.9133	17.0728	17.0768	17.2048	sp		3433	23	16.9497	17.1178	-0.168142	P46939	UTRO_HUMAN	Utrophin (Dystrophin-related protein 1) (DRP-1)	UTRN DMDL DRP1	UTRN
17.9233	18.1222	17.8884	18.0301	17.9122	18.0744	sp		328	623	17.908	18.0756	-0.167606	Q13011	ECH1_HUMAN	Delta(3,5)-Delta(2,4)-dienoyl-CoA isomerase, mitochondrial (EC 5.3.3.-)	ECH1	ECH1
20.1617	20.1373	20.1637	20.2824	19.8713	20.2797	sp		4128	8	20.0656	20.2331	-0.167589	P78527	PRKDC_HUMAN	DNA-dependent protein kinase catalytic subunit (DNA-PK catalytic subunit) (DNA-PKcs) (EC 2.7.11.1) (DNPK1) (p460)	PRKDC HYRC HYRC1	PRKDC
17.5265	17.6484	17.0662	17.6828	17.2514	17.0131	sp		642	930	17.2814	17.4481	-0.166718	Q8WVM8	SCFD1_HUMAN	Sec1 family domain-containing protein 1 (SLY1 homolog) (Sly1p) (Syntaxin-binding protein 1-like 2)	SCFD1 C14orf163 KIAA0917 STXBP1L2 FKSG23	SCFD1
20.3933	20.4943	20.2828	20.557	20.3692	20.4935	tr		457	337	20.3484	20.5149	-0.166513	G3V0I5	G3V0I5_HUMAN	NADH dehydrogenase [ubiquinone] flavoprotein 1, mitochondrial (EC 1.6.99.3) (EC 7.1.1.2)	NDUFV1 hCG_21057	NDUFV1
21.3858	21.5744	21.4234	21.5478	21.3917	21.5781	sp		227	1422	21.4003	21.5668	-0.166479	P00403	COX2_HUMAN	Cytochrome c oxidase subunit 2 (Cytochrome c oxidase polypeptide II)	MT-CO2 COII COX2 COXII MTCO2	MT-CO2
17.096	16.1825	15.9434	17.2533	17.379	17.4806	tr		600	1577	16.8061	16.9722	-0.166031	A0A0A0MR39	A0A0A0MR39_HUMAN	Myelin expression factor 2 (Myelin expression factor 2, isoform CRA_a)	MYEF2 hCG_40072	MYEF2
18.699	18.956	18.7247	18.9196	18.6111	18.6572	sp		312	634	18.6783	18.8443	-0.165997	Q53GQ0	DHB12_HUMAN	Very-long-chain 3-oxoacyl-CoA reductase (EC 1.1.1.330) (17-beta-hydroxysteroid dehydrogenase 12) (17-beta-HSD 12) (3-ketoacyl-CoA reductase) (KAR) (Estradiol 17-beta-dehydrogenase 12) (EC 1.1.1.62) (Short chain dehydrogenase/reductase family 12C member 1)	HSD17B12 SDR12C1	HSD17B12
16.8669	17.1338	17.0743	17.1682	16.9919	17.129	tr		535	483	16.9777	17.1437	-0.165955	K7ELL7	K7ELL7_HUMAN	Glucosidase 2 subunit beta	PRKCSH	PRKCSH
20.0551	20.206	20.0257	20.1831	19.9893	20.1776	sp		194	1059	20.0233	20.1889	-0.165545	P62081	RS7_HUMAN	40S ribosomal protein S7 (Small ribosomal subunit protein eS7)	RPS7	RPS7
16.7352	16.7988	16.6117	16.8169	16.5241	16.7486	sp		176	2404	16.6236	16.7881	-0.164452	Q8N0U8	VKORL_HUMAN	Vitamin K epoxide reductase complex subunit 1-like protein 1 (VKORC1-like protein 1) (EC 1.17.4.4)	VKORC1L1	VKORC1L1
17.6063	17.8247	17.6597	17.805	17.6852	17.8143	sp		417	1886	17.6504	17.8147	-0.164284	P11279	LAMP1_HUMAN	Lysosome-associated membrane glycoprotein 1 (LAMP-1) (Lysosome-associated membrane protein 1) (CD107 antigen-like family member A) (CD antigen CD107a)	LAMP1	LAMP1
18.6716	18.8316	18.646	18.8657	18.7049	18.8178	sp		290	583	18.6742	18.8383	-0.164165	P30084	ECHM_HUMAN	Enoyl-CoA hydratase, mitochondrial (EC 4.2.1.17) (Enoyl-CoA hydratase 1) (Short-chain enoyl-CoA hydratase) (SCEH)	ECHS1	ECHS1
22.574	22.7294	22.535	22.7024	22.5337	22.703	sp		338	387	22.5476	22.7116	-0.164053	P40926	MDHM_HUMAN	Malate dehydrogenase, mitochondrial (EC 1.1.1.37)	MDH2	MDH2
17.936	18.2127	18.0507	18.1123	17.9849	18.1383	sp		616	430	17.9905	18.1544	-0.163872	Q7Z3D6-2	GLUCM_HUMAN	D-glutamate cyclase, mitochondrial (EC 4.2.1.48)	DGLUCY C14orf159 UNQ2439/PRO5000	DGLUCY
14.1315	14.2938	13.5831	14.5448	14.5515	13.9172	sp		902	1996	14.0887	14.2519	-0.163214	Q9BSJ2-4	GCP2_HUMAN	Gamma-tubulin complex component 2 (GCP-2) (hGCP2) (Gamma-ring complex protein 103 kDa) (h103p) (hGrip103) (Spindle pole body protein Spc97 homolog) (hSpc97)	TUBGCP2 GCP2	TUBGCP2
14.2494	14.6276	14.2072	14.3675	14.2608	14.2106	tr		529	2636	14.2391	14.4019	-0.16279	H0Y6V6	H0Y6V6_HUMAN	Limb region 1 protein homolog (Fragment)	LMBR1	LMBR1
15.3058	15.3779	15.2192	15.5017	15.3337	15.467	sp		675	2626	15.2862	15.4489	-0.162646	Q0ZGT2-2	NEXN_HUMAN	Nexilin (F-actin-binding protein) (Nelin)	NEXN	NEXN
16.2168	16.2289	16.2284	16.39	16.0585	16.3724	sp		374	1106	16.1679	16.3304	-0.162521	Q7L2H7	EIF3M_HUMAN	Eukaryotic translation initiation factor 3 subunit M (eIF3m) (Fetal lung protein B5) (hFL-B5) (PCI domain-containing protein 1)	EIF3M HFLB5 PCID1 GA17 PNAS-125	EIF3M
19.4832	19.62	19.4563	19.619	19.4152	19.6019	sp		200	1200	19.4516	19.6136	-0.162062	P61026	RAB10_HUMAN	Ras-related protein Rab-10	RAB10	RAB10
16.3352	16.4676	16.2727	16.3985	16.2513	16.4789	tr		466	1562	16.2864	16.4483	-0.161915	H3BSM7	H3BSM7_HUMAN	RUS1 family protein C16orf58	C16orf58	C16orf58
17.3017	17.5077	17.4704	17.5425	17.2574	17.4646	sp		315	1359	17.3432	17.5049	-0.161766	Q8NFV4	ABHDB_HUMAN	Protein ABHD11 (EC 3.-.-.-) (Alpha/beta hydrolase domain-containing protein 11) (Abhydrolase domain-containing protein 11) (Williams-Beuren syndrome chromosomal region 21 protein)	ABHD11 WBSCR21 PP1226	ABHD11
17.7895	17.9806	17.6874	17.8682	17.8741	17.9867	sp		160	2039	17.7837	17.9452	-0.16148	P46778	RL21_HUMAN	60S ribosomal protein L21 (Large ribosomal subunit protein eL21)	RPL21	RPL21
15.2754	15.7314	15.0821	15.5708	15.2193	14.7573	sp		421	2670	15.1923	15.3532	-0.160912	Q86TX2	ACOT1_HUMAN	Acyl-coenzyme A thioesterase 1 (Acyl-CoA thioesterase 1) (EC 3.1.2.-) (CTE-I) (CTE-Ib) (Inducible cytosolic acyl-coenzyme A thioester hydrolase) (Long chain acyl-CoA thioester hydrolase) (Long chain acyl-CoA hydrolase) (Palmitoyl-coenzyme A thioesterase) (EC 3.1.2.2)	ACOT1 CTE1	ACOT1
18.3719	18.4603	18.3681	18.6105	18.3227	18.4737	sp		393	928	18.3542	18.5149	-0.160648	P51553	IDH3G_HUMAN	Isocitrate dehydrogenase [NAD] subunit gamma, mitochondrial (Isocitric dehydrogenase subunit gamma) (NAD(+)-specific ICDH subunit gamma)	IDH3G	IDH3G
18.1296	17.9758	18.0296	18.2184	17.6657	18.1121	sp		408	603	17.9416	18.1021	-0.160461	Q8NC51	PAIRB_HUMAN	Plasminogen activator inhibitor 1 RNA-binding protein (PAI1 RNA-binding protein 1) (PAI-RBP1) (SERPINE1 mRNA-binding protein 1)	SERBP1 PAIRBP1 CGI-55	SERBP1
20.1915	20.3331	20.1255	20.3173	20.1303	20.2782	sp		144	1016	20.1491	20.3095	-0.160421	Q9P0J0	NDUAD_HUMAN	NADH dehydrogenase [ubiquinone] 1 alpha subcomplex subunit 13 (Cell death regulatory protein GRIM-19) (Complex I-B16.6) (CI-B16.6) (Gene associated with retinoic and interferon-induced mortality 19 protein) (GRIM-19) (Gene associated with retinoic and IFN-induced mortality 19 protein) (NADH-ubiquinone oxidoreductase B16.6 subunit)	NDUFA13 GRIM19 CDA016 CGI-39	NDUFA13
19.1408	19.3435	19.1656	19.3284	19.1744	19.2891	sp		403	417	19.1603	19.3203	-0.16008	P39023	RL3_HUMAN	60S ribosomal protein L3 (HIV-1 TAR RNA-binding protein B) (TARBP-B) (Large ribosomal subunit protein uL3)	RPL3 OK/SW-cl.32	RPL3
14.7609	14.4259	13.1374	14.5025	14.8534	14.3034	sp		534	1227	14.2506	14.4106	-0.160024	Q13564	ULA1_HUMAN	NEDD8-activating enzyme E1 regulatory subunit (Amyloid beta precursor protein-binding protein 1, 59 kDa) (APP-BP1) (Amyloid protein-binding protein 1) (Proto-oncogene protein 1)	NAE1 APPBP1 HPP1	NAE1
19.7614	19.9239	19.7791	19.9223	19.7066	19.8772	sp		430	235	19.749	19.9078	-0.158745	P05783	K1C18_HUMAN	Keratin, type I cytoskeletal 18 (Cell proliferation-inducing gene 46 protein) (Cytokeratin-18) (CK-18) (Keratin-18) (K18)	KRT18 CYK18 PIG46	KRT18
17.5709	17.5201	17.3107	17.726	17.6243	17.7353	sp		488	1249	17.502	17.6605	-0.158495	P20073	ANXA7_HUMAN	Annexin A7 (Annexin VII) (Annexin-7) (Synexin)	ANXA7 ANX7 SNX OK/SW-cl.95	ANXA7
17.6467	17.7975	17.6965	17.7695	17.5913	17.8413	sp		424	725	17.6448	17.8027	-0.157894	P09110	THIK_HUMAN	3-ketoacyl-CoA thiolase, peroxisomal (EC 2.3.1.16) (Acetyl-CoA acyltransferase) (Beta-ketothiolase) (Peroxisomal 3-oxoacyl-CoA thiolase)	ACAA1 ACAA PTHIO	ACAA1
19.8972	20.0462	19.9046	20.0849	19.8947	20.0375	sp		146	1178	19.8988	20.0562	-0.15736	P62249	RS16_HUMAN	40S ribosomal protein S16 (Small ribosomal subunit protein uS9)	RPS16	RPS16
13.4732	11.1176	13.0751	13.5964	11.3801	13.6857	sp		678	2614	12.6428	12.7999	-0.157086	Q13948-9	CASP_HUMAN	Protein CASP	CUX1 CUTL1	CUX1
20.0494	20.2269	20.0964	20.2438	20.0678	20.2129	sp		136	1374	20.0712	20.2279	-0.156693	P61353	RL27_HUMAN	60S ribosomal protein L27 (Large ribosomal subunit protein eL27)	RPL27	RPL27
18.3662	18.5601	18.373	18.5611	18.4168	18.5044	sp		378	744	18.3853	18.5419	-0.156544	P51991	ROA3_HUMAN	Heterogeneous nuclear ribonucleoprotein A3 (hnRNP A3)	HNRNPA3 HNRPA3	HNRNPA3
15.2762	15.3155	14.987	15.2749	15.102	15.2441	sp		203	1467	15.1217	15.2782	-0.156416	Q969Q5	RAB24_HUMAN	Ras-related protein Rab-24	RAB24	RAB24
20.7822	20.9514	20.78	20.9516	20.8112	20.9371	sp		255	695	20.7911	20.9467	-0.155567	P38117	ETFB_HUMAN	Electron transfer flavoprotein subunit beta (Beta-ETF)	ETFB FP585	ETFB
18.4544	18.6543	18.4881	18.6428	18.5052	18.6157	sp		1230	162	18.4825	18.6376	-0.155073	Q86VP6	CAND1_HUMAN	Cullin-associated NEDD8-dissociated protein 1 (Cullin-associated and neddylation-dissociated protein 1) (TBP-interacting protein of 120 kDa A) (TBP-interacting protein 120A) (p120 CAND1)	CAND1 KIAA0829 TIP120 TIP120A	CAND1
16.3957	15.9981	15.5245	16.0437	16.1487	16.4922	sp		395	1964	16.023	16.178	-0.155031	P31153	METK2_HUMAN	S-adenosylmethionine synthase isoform type-2 (AdoMet synthase 2) (EC 2.5.1.6) (Methionine adenosyltransferase 2) (MAT 2) (Methionine adenosyltransferase II) (MAT-II)	MAT2A AMS2 MATA2	MAT2A
17.1102	17.318	17.1393	17.2778	17.1318	17.2505	tr		105	1601	17.1271	17.2821	-0.154972	Q5R3B4	Q5R3B4_HUMAN	Mitochondrial pyruvate carrier (Fragment)	MPC2	MPC2
14.4734	13.0683	10.9975	12.9693	14.4452	14.341	sp		232	2052	13.3054	13.4595	-0.154152	Q9UEU0	VTI1B_HUMAN	Vesicle transport through interaction with t-SNAREs homolog 1B (Vesicle transport v-SNARE protein Vti1-like 1) (Vti1-rp1)	VTI1B VTI1 VTI1L VTI1L1 VTI2	VTI1B
15.4978	15.699	15.3555	15.4965	15.4076	15.5266	sp		260	1985	15.4203	15.5741	-0.153731	Q9BUB7	TMM70_HUMAN	Transmembrane protein 70, mitochondrial	TMEM70	TMEM70
20.1617	20.3177	20.1007	20.2834	20.1217	20.2438	sp		168	1802	20.128	20.2816	-0.153599	P30049	ATPD_HUMAN	ATP synthase subunit delta, mitochondrial (ATP synthase F1 subunit delta) (F-ATPase delta subunit)	ATP5F1D ATP5D	ATP5F1D
21.3114	21.4781	21.3141	21.461	21.3324	21.4782	sp		592	99	21.3193	21.4724	-0.153162	P27824	CALX_HUMAN	Calnexin (IP90) (Major histocompatibility complex class I antigen-binding protein p88) (p90)	CANX	CANX
15.5526	15.7006	16.06	16.1586	16.1375	16.3488	sp		546	936	15.9167	16.0693	-0.152627	Q9NRG9	AAAS_HUMAN	Aladin (Adracalin)	AAAS ADRACALA GL003	AAAS
15.4023	15.5283	15.3301	15.4932	15.4827	15.6471	sp		492	2086	15.405	15.5562	-0.151151	Q2TAA5	ALG11_HUMAN	GDP-Man:Man(3)GlcNAc(2)-PP-Dol alpha-1,2-mannosyltransferase (EC 2.4.1.131) (Asparagine-linked glycosylation protein 11 homolog) (Glycolipid 2-alpha-mannosyltransferase)	ALG11 GT8	ALG11
19.792	19.9412	19.7352	19.9587	19.8341	19.9148	tr		390	461	19.7871	19.9383	-0.151125	E7ESZ7	E7ESZ7_HUMAN	NADH dehydrogenase [ubiquinone] 1 alpha subcomplex subunit 10, mitochondrial	NDUFA10	NDUFA10
16.5429	16.6389	16.497	16.6441	16.5806	16.7905	sp		108	2675	16.5402	16.6912	-0.15103	P56181	NDUV3_HUMAN	NADH dehydrogenase [ubiquinone] flavoprotein 3, mitochondrial (Complex I-9kD) (CI-9kD) (NADH-ubiquinone oxidoreductase 9 kDa subunit) (Renal carcinoma antigen NY-REN-4)	NDUFV3	NDUFV3
17.6785	17.7512	17.6271	17.7836	17.638	17.8611	sp		401	777	17.6479	17.7987	-0.150791	Q13561	DCTN2_HUMAN	Dynactin subunit 2 (50 kDa dynein-associated polypeptide) (Dynactin complex 50 kDa subunit) (DCTN-50) (p50 dynamitin)	DCTN2 DCTN50	DCTN2
17.968	18.2053	18.0567	18.1177	18.0715	18.2234	sp		261	1443	18.0321	18.1821	-0.150066	Q92506	DHB8_HUMAN	Estradiol 17-beta-dehydrogenase 8 (EC 1.1.1.62) (17-beta-hydroxysteroid dehydrogenase 8) (17-beta-HSD 8) (3-ketoacyl-[acyl-carrier-protein] reductase alpha subunit) (KAR alpha subunit) (3-oxoacyl-[acyl-carrier-protein] reductase) (EC 1.1.1.-) (Protein Ke6) (Ke-6) (Really interesting new gene 2 protein) (Short chain dehydrogenase/reductase family 30C member 1) (Testosterone 17-beta-dehydrogenase 8…	HSD17B8 FABGL HKE6 RING2 SDR30C1	HSD17B8
17.7779	17.8668	17.7638	17.9775	17.7108	17.8579	sp		217	1274	17.7508	17.9007	-0.149893	P62906	RL10A_HUMAN	60S ribosomal protein L10a (CSA-19) (Large ribosomal subunit protein uL1) (Neural precursor cell expressed developmentally down-regulated protein 6) (NEDD-6)	RPL10A NEDD6	RPL10A
18.9591	19.1179	18.9607	19.1124	18.9917	19.1305	sp		151	1269	18.9705	19.1203	-0.149746	P62277	RS13_HUMAN	40S ribosomal protein S13 (Small ribosomal subunit protein uS15)	RPS13	RPS13
17.8275	17.9542	17.82	17.9039	17.7273	17.9638	sp		445	714	17.7916	17.9407	-0.149071	P60228	EIF3E_HUMAN	Eukaryotic translation initiation factor 3 subunit E (eIF3e) (Eukaryotic translation initiation factor 3 subunit 6) (Viral integration site protein INT-6 homolog) (eIF-3 p48)	EIF3E EIF3S6 INT6	EIF3E
16.1474	16.6903	16.6154	16.816	16.7395	16.4414	sp		1002	760	16.5008	16.6493	-0.148495	Q08379	GOGA2_HUMAN	Golgin subfamily A member 2 (130 kDa cis-Golgi matrix protein) (GM130) (GM130 autoantigen) (Golgin-95)	GOLGA2	GOLGA2
14.4302	14.594	15.1517	14.8643	14.4695	15.0381	sp		319	2239	14.6838	14.8321	-0.14834	Q8TB37	NUBPL_HUMAN	Iron-sulfur protein NUBPL (IND1 homolog) (Nucleotide-binding protein-like) (huInd1)	NUBPL C14orf127	NUBPL
14.9182	15.8085	15.877	15.7206	15.9249	15.6356	tr		616	2205	15.5734	15.7216	-0.148196	E7EX17	E7EX17_HUMAN	Eukaryotic translation initiation factor 4B	EIF4B	EIF4B
17.2699	17.4816	17.4063	17.456	17.2853	17.4684	sp		145	1212	17.3205	17.4687	-0.14819	Q9UI09	NDUAC_HUMAN	NADH dehydrogenase [ubiquinone] 1 alpha subcomplex subunit 12 (13 kDa differentiation-associated protein) (Complex I-B17.2) (CI-B17.2) (CIB17.2) (NADH-ubiquinone oxidoreductase subunit B17.2)	NDUFA12 DAP13	NDUFA12
17.9856	18.146	17.9951	18.1554	18.0026	18.1258	sp		290	1355	17.9944	18.1424	-0.147974	Q01105-2	SET_HUMAN	Protein SET (HLA-DR-associated protein II) (Inhibitor of granzyme A-activated DNase) (IGAAD) (PHAPII) (Phosphatase 2A inhibitor I2PP2A) (I-2PP2A) (Template-activating factor I) (TAF-I)	SET	SET
17.2179	17.4309	17.2854	17.3909	17.319	17.4424	tr		188	2496	17.2741	17.4214	-0.147291	Q5JR08	Q5JR08_HUMAN	Rho-related GTP-binding protein RhoC (Fragment)	RHOC	RHOC
16.7704	17.0514	16.9189	17.1303	16.9113	16.8578	sp		938	766	16.8669	17.0132	-0.146278	Q86XP3	DDX42_HUMAN	ATP-dependent RNA helicase DDX42 (EC 3.6.4.13) (DEAD box protein 42) (RNA helicase-like protein) (RHELP) (RNA helicase-related protein) (RNAHP) (SF3b DEAD box protein) (Splicing factor 3B-associated 125 kDa protein) (SF3b125)	DDX42	DDX42
19.1945	19.3626	19.1574	19.2847	19.2148	19.3559	sp		116	1366	19.1889	19.3344	-0.145477	Q16718	NDUA5_HUMAN	NADH dehydrogenase [ubiquinone] 1 alpha subcomplex subunit 5 (Complex I subunit B13) (Complex I-13kD-B) (CI-13kD-B) (NADH-ubiquinone oxidoreductase 13 kDa-B subunit)	NDUFA5	NDUFA5
18.2749	18.5736	18.512	18.5986	18.5416	18.5923	tr		607	383	18.4429	18.5882	-0.145302	B0QY89	B0QY89_HUMAN	Eukaryotic translation initiation factor 3 subunit L (eIF3l) (Eukaryotic translation initiation factor 3 subunit 6-interacting protein) (Eukaryotic translation initiation factor 3 subunit E-interacting protein)	EIF3L EIF3EIP EIF3S6IP	EIF3L
19.3612	19.5338	19.3166	19.4757	19.4098	19.5136	sp		535	138	19.3625	19.5077	-0.145164	P78371	TCPB_HUMAN	T-complex protein 1 subunit beta (TCP-1-beta) (CCT-beta)	CCT2 99D8.1 CCTB	CCT2
16.3685	16.4786	16.2945	16.5045	16.3644	16.4795	sp		181	1625	16.3424	16.4875	-0.145088	P40616	ARL1_HUMAN	ADP-ribosylation factor-like protein 1	ARL1	ARL1
15.202	15.4387	15.3181	15.3899	15.355	15.4808	sp		589	2476	15.2917	15.4364	-0.144742	Q9UMX0	UBQL1_HUMAN	Ubiquilin-1 (Protein linking IAP with cytoskeleton 1) (PLIC-1) (hPLIC-1)	UBQLN1 DA41 PLIC1	UBQLN1
17.7441	17.9144	17.7265	17.9081	17.7381	17.8203	sp		58	2403	17.7363	17.881	-0.144705	O75438	NDUB1_HUMAN	NADH dehydrogenase [ubiquinone] 1 beta subcomplex subunit 1 (Complex I-MNLL) (CI-MNLL) (NADH-ubiquinone oxidoreductase MNLL subunit)	NDUFB1	NDUFB1
14.7004	14.7555	14.3485	14.3441	14.5514	14.9329	sp		463	339	14.5335	14.6775	-0.14403	P61978-3	HNRPK_HUMAN	Heterogeneous nuclear ribonucleoprotein K (hnRNP K) (Transformation up-regulated nuclear protein) (TUNP)	HNRNPK HNRPK	HNRNPK
15.5606	15.4494	15.5415	15.4567	15.5984	16.2263	sp		447	1825	15.5668	15.7108	-0.14395	P63151	2ABA_HUMAN	Serine/threonine-protein phosphatase 2A 55 kDa regulatory subunit B alpha isoform (PP2A subunit B isoform B55-alpha) (PP2A subunit B isoform PR55-alpha) (PP2A subunit B isoform R2-alpha) (PP2A subunit B isoform alpha)	PPP2R2A	PPP2R2A
13.0484	10.7059	10.0001	14.4035	14.3223	12.6927	sp		417	2012	12.4569	12.6007	-0.143736	Q9NZ32	ARP10_HUMAN	Actin-related protein 10 (Actin-related protein 11) (hARP11)	ACTR10 ACTR11 ARP11	ACTR10
15.019	15.1357	15.1211	15.3163	15.1775	15.2968	tr		292	827	15.1059	15.2496	-0.143717	Q32Q12	Q32Q12_HUMAN	Nucleoside diphosphate kinase (EC 2.7.4.6)	NME1-NME2 hCG_2001850	NME1-NME2
18.5287	18.6175	18.4669	18.643	18.4657	18.6303	tr		631	555	18.4871	18.6303	-0.143167	J3KPF3	J3KPF3_HUMAN	4F2 cell-surface antigen heavy chain (Solute carrier family 3 (Activators of dibasic and neutral amino acid transport), member 2, isoform CRA_a)	SLC3A2 hCG_2016598	SLC3A2
17.9991	17.9371	18.0325	18.2795	18.0261	18.27	sp		132	1472	18.0192	18.1622	-0.142962	P25398	RS12_HUMAN	40S ribosomal protein S12 (Small ribosomal subunit protein eS12)	RPS12	RPS12
16.5774	16.6976	16.6041	16.6247	16.4245	16.7125	sp		137	1210	16.5353	16.6783	-0.142952	P46779	RL28_HUMAN	60S ribosomal protein L28 (Large ribosomal subunit protein eL28)	RPL28	RPL28
15.6773	15.8312	15.6837	15.843	15.7699	15.8848	sp		196	2327	15.7103	15.853	-0.142702	O15258	RER1_HUMAN	Protein RER1	RER1	RER1
14.1627	14.1537	14.0157	14.2504	14.0731	14.2752	tr		1478	2197	14.0838	14.2264	-0.14258	A0A0C4DG98	A0A0C4DG98_HUMAN	THO complex subunit 2	THOC2	THOC2
19.0266	19.1702	18.6741	18.8	18.7455	18.9018	sp		558	660	18.8154	18.9574	-0.141943	P35052	GPC1_HUMAN	Glypican-1 [Cleaved into: Secreted glypican-1]	GPC1	GPC1
14.7779	15.005	14.6985	14.8842	14.9207	14.9334	sp		1116	762	14.799	14.9409	-0.141852	Q8IUD2	RB6I2_HUMAN	ELKS/Rab6-interacting/CAST family member 1 (ERC-1) (Rab6-interacting protein 2)	ERC1 ELKS KIAA1081 RAB6IP2	ERC1
17.3188	17.4376	17.3966	17.5094	17.3221	17.5141	tr		1327	419	17.3458	17.4871	-0.141256	E9PF10	E9PF10_HUMAN	Nuclear pore complex protein Nup155	NUP155	NUP155
14.9972	14.8616	14.5376	15.0495	14.663	14.71	tr		255	2346	14.7326	14.8737	-0.1411	J3KNF4	J3KNF4_HUMAN	Copper chaperone for superoxide dismutase	CCS	CCS
16.6653	16.7179	16.6416	16.8511	16.641	16.8015	sp		551	1138	16.6493	16.7901	-0.140848	P19525	E2AK2_HUMAN	Interferon-induced, double-stranded RNA-activated protein kinase (EC 2.7.11.1) (Eukaryotic translation initiation factor 2-alpha kinase 2) (eIF-2A protein kinase 2) (Interferon-inducible RNA-dependent protein kinase) (P1/eIF-2A protein kinase) (Protein kinase RNA-activated) (PKR) (Protein kinase R) (Tyrosine-protein kinase EIF2AK2) (EC 2.7.10.2) (p68 kinase)	EIF2AK2 PKR PRKR	EIF2AK2
16.0189	16.0581	16.0584	16.1636	16.0379	16.3157	sp		237	1922	16.0384	16.1791	-0.140697	Q8N4T8	CBR4_HUMAN	Carbonyl reductase family member 4 (EC 1.-.-.-) (3-ketoacyl-[acyl-carrier-protein] reductase beta subunit) (KAR beta subunit) (3-oxoacyl-[acyl-carrier-protein] reductase) (EC 1.1.1.-) (Quinone reductase CBR4) (Short chain dehydrogenase/reductase family 45C member 1)	CBR4 SDR45C1	CBR4
18.9779	20.5261	21.5368	20.5736	21.5289	21.3643	sp		375	1050	20.6812	20.8213	-0.140141	P63261	ACTG_HUMAN	Actin, cytoplasmic 2 (Gamma-actin) [Cleaved into: Actin, cytoplasmic 2, N-terminally processed]	ACTG1 ACTG	ACTG1
12.9205	14.0435	14.5524	13.9659	14.1557	14.0391	sp		275	2709	13.8762	14.0162	-0.139975	Q9H1Y0	ATG5_HUMAN	Autophagy protein 5 (APG5-like) (Apoptosis-specific protein)	ATG5 APG5L ASP	ATG5
15.8196	15.8962	15.8147	15.9425	15.7591	15.9747	sp		102	2616	15.7978	15.9378	-0.139973	P62310	LSM3_HUMAN	U6 snRNA-associated Sm-like protein LSm3	LSM3 MDS017	LSM3
14.934	14.4075	14.2242	14.9274	14.2267	14.4683	tr		571	2570	14.4617	14.6011	-0.139415	G5E994	G5E994_HUMAN	G protein-coupled receptor 107, isoform CRA_c (Protein GPR107)	GPR107 hCG_1810895	GPR107
15.336	15.4768	15.3982	15.7492	15.6602	15.5866	sp		1584	1173	15.4648	15.6042	-0.139406	Q5SW79	CE170_HUMAN	Centrosomal protein of 170 kDa (Cep170) (KARP-1-binding protein) (KARP1-binding protein)	CEP170 FAM68A KAB KIAA0470	CEP170
15.6763	15.8626	15.6408	15.8318	15.6668	15.7068	sp		195	1830	15.6613	15.8004	-0.139121	P49006	MRP_HUMAN	MARCKS-related protein (MARCKS-like protein 1) (Macrophage myristoylated alanine-rich C kinase substrate) (Mac-MARCKS) (MacMARCKS)	MARCKSL1 MLP MRP	MARCKSL1
16.4428	16.6791	16.5298	16.6985	16.588	16.5997	tr		632	2669	16.5202	16.6591	-0.138876	E7EV99	E7EV99_HUMAN	Alpha-adducin	ADD1	ADD1
15.7288	15.948	15.877	15.9039	15.8605	16.0307	sp		153	2006	15.8221	15.9609	-0.138757	Q9BPX5	ARP5L_HUMAN	Actin-related protein 2/3 complex subunit 5-like protein (Arp2/3 complex 16 kDa subunit 2) (ARC16-2)	ARPC5L	ARPC5L
14.3622	14.4841	14.402	14.4918	14.071	14.272	tr		490	1584	14.2784	14.4159	-0.13752	M0QYH2	M0QYH2_HUMAN	Bifunctional polynucleotide phosphatase/kinase	PNKP	PNKP
16.7609	16.8527	16.7584	16.6548	16.6987	17.1229	sp		393	631	16.7393	16.8768	-0.137489	Q99536	VAT1_HUMAN	Synaptic vesicle membrane protein VAT-1 homolog (EC 1.-.-.-)	VAT1	VAT1
16.2079	16.4579	16.2837	16.5092	16.3386	16.2744	sp		475	1983	16.2767	16.4138	-0.137094	O75844	FACE1_HUMAN	CAAX prenyl protease 1 homolog (EC 3.4.24.84) (Farnesylated proteins-converting enzyme 1) (FACE-1) (Prenyl protein-specific endoprotease 1) (Zinc metalloproteinase Ste24 homolog)	ZMPSTE24 FACE1 STE24	ZMPSTE24
17.6537	18.1014	17.8371	17.8045	18.0569	18.0526	sp		414	876	17.8492	17.9862	-0.136961	Q92552-2	RT27_HUMAN	28S ribosomal protein S27, mitochondrial (MRP-S27) (S27mt) (Mitochondrial ribosomal protein S27) (Mitochondrial small ribosomal subunit protein mS27)	MRPS27 KIAA0264	MRPS27
15.857	16.0885	14.6498	14.6278	16.0259	16.2271	sp		96	2335	15.5109	15.6478	-0.136882	P60468	SC61B_HUMAN	Protein transport protein Sec61 subunit beta	SEC61B	SEC61B
17.6815	17.8316	17.675	17.7966	17.7682	17.9064	sp		323	1045	17.7083	17.8449	-0.1366	Q13642-5	FHL1_HUMAN	Four and a half LIM domains protein 1 (FHL-1) (Skeletal muscle LIM-protein 1) (SLIM) (SLIM-1)	FHL1 SLIM1	FHL1
18.4868	18.5979	18.475	18.617	18.502	18.6559	sp		999	177	18.4879	18.6236	-0.135696	Q9Y4L1	HYOU1_HUMAN	Hypoxia up-regulated protein 1 (150 kDa oxygen-regulated protein) (ORP-150) (170 kDa glucose-regulated protein) (GRP-170)	HYOU1 GRP170 ORP150	HYOU1
20.4	20.5304	20.4381	20.53	20.4217	20.6043	sp		452	204	20.4199	20.5549	-0.134985	P49411	EFTU_HUMAN	Elongation factor Tu, mitochondrial (EF-Tu) (P43)	TUFM	TUFM
12.9277	13.3281	13.284	13.5356	12.8727	12.6242	tr		506	2176	13.0281	13.1627	-0.134536	H3BTB7	H3BTB7_HUMAN	Probable glutamate--tRNA ligase, mitochondrial	EARS2	EARS2
15.0687	15.5533	15.2111	15.1506	15.2157	15.1925	sp		135	1109	15.1652	15.2988	-0.133657	P08708	RS17_HUMAN	40S ribosomal protein S17 (Small ribosomal subunit protein eS17)	RPS17 RPS17L	RPS17
15.5473	15.8743	15.8538	16.0407	15.7044	15.5895	tr		322	1740	15.7018	15.8349	-0.133018	A0A0C4DGQ5	A0A0C4DGQ5_HUMAN	Calpain small subunit 1 (Epididymis secretory sperm binding protein)	CAPNS1	CAPNS1
13.6233	14.2581	13.3744	13.4776	13.469	13.1294	sp		734	2056	13.4889	13.6217	-0.13282	Q9UBT7	CTNL1_HUMAN	Alpha-catulin (Alpha-catenin-related protein) (ACRP) (Catenin alpha-like protein 1)	CTNNAL1	CTNNAL1
21.4334	21.5702	21.4319	21.5769	21.4698	21.5833	sp		1086	56	21.445	21.5768	-0.131779	Q13423	NNTM_HUMAN	NAD(P) transhydrogenase, mitochondrial (EC 7.1.1.1) (Nicotinamide nucleotide transhydrogenase) (Pyridine nucleotide transhydrogenase)	NNT	NNT
16.5057	16.9613	16.825	16.8196	16.8457	16.7904	sp		616	626	16.7255	16.8571	-0.131645	P27694	RFA1_HUMAN	Replication protein A 70 kDa DNA-binding subunit (RP-A p70) (Replication factor A protein 1) (RF-A protein 1) (Single-stranded DNA-binding protein) [Cleaved into: Replication protein A 70 kDa DNA-binding subunit, N-terminally processed]	RPA1 REPA1 RPA70	RPA1
16.8406	16.6166	16.3748	16.5236	15.9612	16.4299	sp		241	1692	16.3922	16.5233	-0.131149	P78417	GSTO1_HUMAN	Glutathione S-transferase omega-1 (GSTO-1) (EC 2.5.1.18) (Glutathione S-transferase omega 1-1) (GSTO 1-1) (Glutathione-dependent dehydroascorbate reductase) (EC 1.8.5.1) (Monomethylarsonic acid reductase) (MMA(V) reductase) (EC 1.20.4.2) (S-(Phenacyl)glutathione reductase) (SPG-R)	GSTO1 GSTTLP28	GSTO1
17.1635	17.3064	17.0308	17.277	17.1935	17.1977	sp		175	1741	17.1293	17.2604	-0.131104	Q9P032	NDUF4_HUMAN	NADH dehydrogenase [ubiquinone] 1 alpha subcomplex assembly factor 4 (Hormone-regulated proliferation-associated protein of 20 kDa)	NDUFAF4 C6orf66 HRPAP20 HSPC125 My013	NDUFAF4
17.5085	17.6764	17.0958	17.2271	17.5789	17.6715	sp		511	748	17.3944	17.525	-0.130655	P48444	COPD_HUMAN	Coatomer subunit delta (Archain) (Delta-coat protein) (Delta-COP)	ARCN1 COPD	ARCN1
13.8966	14.3456	14.1107	14.0224	14.0438	14.0746	sp		737	1992	14.017	14.1475	-0.130494	Q9BQ39	DDX50_HUMAN	ATP-dependent RNA helicase DDX50 (EC 3.6.4.13) (DEAD box protein 50) (Gu-beta) (Nucleolar protein Gu2)	DDX50	DDX50
17.0206	16.9805	16.8613	16.968	16.7453	17.068	sp		399	2180	16.8758	17.0055	-0.129753	Q99442	SEC62_HUMAN	Translocation protein SEC62 (Translocation protein 1) (TP-1) (hTP-1)	SEC62 TLOC1	SEC62
13.5624	13.5996	13.7757	13.7613	13.6945	14.0607	tr		114	2637	13.6775	13.8072	-0.129687	A0A087WYS5	A0A087WYS5_HUMAN	Trafficking protein particle complex subunit 3	TRAPPC3	TRAPPC3
15.1526	15.5673	15.2045	15.2384	15.1665	15.103	sp		1156	618	15.1745	15.3029	-0.128379	Q8WUM0	NU133_HUMAN	Nuclear pore complex protein Nup133 (133 kDa nucleoporin) (Nucleoporin Nup133)	NUP133	NUP133
17.8745	17.9882	17.8951	17.9986	17.8732	18.0384	sp		130	1396	17.8809	18.0084	-0.127443	P62244	RS15A_HUMAN	40S ribosomal protein S15a (Small ribosomal subunit protein uS8)	RPS15A OK/SW-cl.82	RPS15A
18.9724	19.0862	18.8987	19.0454	18.8737	18.995	sp		505	440	18.9149	19.0422	-0.127266	Q9UHG3	PCYOX_HUMAN	Prenylcysteine oxidase 1 (EC 1.8.3.5) (Prenylcysteine lyase)	PCYOX1 KIAA0908 PCL1 UNQ597/PRO1183	PCYOX1
16.1493	15.9911	16.369	16.4414	15.859	16.325	tr		479	799	16.1258	16.2525	-0.126722	F5H5P2	F5H5P2_HUMAN	2-oxoisovalerate dehydrogenase subunit alpha (EC 1.2.4.4) (Branched-chain alpha-keto acid dehydrogenase E1 component alpha chain)
14.1841	13.9471	13.7942	14.1949	13.6707	13.8868	sp		717	1275	13.883	14.0096	-0.126623	Q9H307	PININ_HUMAN	Pinin (140 kDa nuclear and cell adhesion-related phosphoprotein) (Desmosome-associated protein) (Domain-rich serine protein) (DRS protein) (DRSP) (Melanoma metastasis clone A protein) (Nuclear protein SDK3) (SR-like protein)	PNN DRS MEMA	PNN
16.2169	16.2704	16.2238	16.449	16.2869	16.3869	sp		206	1671	16.2425	16.3688	-0.126228	O43399-7	TPD54_HUMAN	Tumor protein D54 (hD54) (Tumor protein D52-like 2)	TPD52L2	TPD52L2
15.4157	15.4294	15.3614	15.5724	15.4764	15.63	sp		208	2270	15.4178	15.5439	-0.126119	Q9NRW1	RAB6B_HUMAN	Ras-related protein Rab-6B	RAB6B	RAB6B
16.9992	17.1825	16.9984	17.0481	17.053	17.197	tr		257	1585	17.0169	17.1426	-0.125668	E9PI68	E9PI68_HUMAN	Signal peptidase complex subunit 2	SPCS2	SPCS2
11.671	13.526	13.4041	13.6881	13.5452	11.7829	sp		726	1137	12.8734	12.999	-0.125576	P35612	ADDB_HUMAN	Beta-adducin (Erythrocyte adducin subunit beta)	ADD2 ADDB	ADD2
14.676	15.0054	14.581	14.4405	14.1661	14.3522	sp		859	523	14.4743	14.5994	-0.125042	Q9UKV8	AGO2_HUMAN	Protein argonaute-2 (Argonaute2) (hAgo2) (EC 3.1.26.n2) (Argonaute RISC catalytic component 2) (Eukaryotic translation initiation factor 2C 2) (eIF-2C 2) (eIF2C 2) (PAZ Piwi domain protein) (PPD) (Protein slicer)	AGO2 EIF2C2	AGO2
17.5378	17.9368	17.8222	17.7811	17.8636	17.8806	sp		372	1498	17.7412	17.8662	-0.124987	Q9NVD7	PARVA_HUMAN	Alpha-parvin (Actopaxin) (CH-ILKBP) (Calponin-like integrin-linked kinase-binding protein) (Matrix-remodeling-associated protein 2)	PARVA MXRA2	PARVA
14.7264	15.3178	15.0314	15.2464	15.6382	15.2063	sp		673	2000	15.132	15.2568	-0.124859	Q8IUR7	ARMC8_HUMAN	Armadillo repeat-containing protein 8	ARMC8 S863-2	ARMC8
17.4115	16.9786	17.3633	16.9164	15.6302	16.8833	sp		184	1532	16.8017	16.9261	-0.124418	Q04760	LGUL_HUMAN	Lactoylglutathione lyase (EC 4.4.1.5) (Aldoketomutase) (Glyoxalase I) (Glx I) (Ketone-aldehyde mutase) (Methylglyoxalase) (S-D-lactoylglutathione methylglyoxal lyase)	GLO1	GLO1
15.0748	15.4166	15.215	15.2587	15.1975	15.1852	sp		201	1791	15.1624	15.2868	-0.124372	Q15286	RAB35_HUMAN	Ras-related protein Rab-35 (GTP-binding protein RAY) (Ras-related protein Rab-1C)	RAB35 RAB1C RAY	RAB35
15.4898	15.5034	15.3941	15.4021	15.3078	15.6584	sp		124	1754	15.3972	15.5213	-0.124063	Q9UHA4	LTOR3_HUMAN	Ragulator complex protein LAMTOR3 (Late endosomal/lysosomal adaptor and MAPK and MTOR activator 3) (MEK-binding partner 1) (Mp1) (Mitogen-activated protein kinase kinase 1-interacting protein 1) (Mitogen-activated protein kinase scaffold protein 1)	LAMTOR3 MAP2K1IP1 MAPKSP1 PRO2783	LAMTOR3
18.6792	18.8276	18.6793	18.8296	18.6871	18.7589	sp		317	505	18.6819	18.8054	-0.123484	P05388	RLA0_HUMAN	60S acidic ribosomal protein P0 (60S ribosomal protein L10E) (Large ribosomal subunit protein uL10)	RPLP0	RPLP0
14.8856	15.0876	15.1265	15.1206	15.0725	15.2465	sp		634	1454	15.0282	15.1516	-0.123392	Q8IYS2	K2013_HUMAN	Uncharacterized protein KIAA2013	KIAA2013	KIAA2013
20.5395	20.6892	20.5503	20.6588	20.5602	20.6718	sp		5890	1	20.55	20.6733	-0.12326	Q09666	AHNK_HUMAN	Neuroblast differentiation-associated protein AHNAK (Desmoyokin)	AHNAK PM227	AHNAK
19.2278	19.2187	19.228	19.3307	18.9704	19.2458	sp		876	224	19.1421	19.2651	-0.123018	Q14974	IMB1_HUMAN	Importin subunit beta-1 (Importin-90) (Karyopherin subunit beta-1) (Nuclear factor p97) (Pore targeting complex 97 kDa subunit) (PTAC97)	KPNB1 NTF97	KPNB1
15.1711	15.0932	15.0898	15.2333	14.9862	15.2896	sp		727	1525	15.0824	15.2054	-0.122988	P46199	IF2M_HUMAN	Translation initiation factor IF-2, mitochondrial (IF-2(Mt)) (IF-2Mt) (IF2(mt))	MTIF2	MTIF2
12.5889	11.7024	12.6828	13.1025	12.6007	13.4338	sp		580	2218	12.6241	12.7463	-0.122147	Q9NXV6	CARF_HUMAN	CDKN2A-interacting protein (Collaborator of ARF)	CDKN2AIP CARF	CDKN2AIP
14.3064	14.874	13.5754	13.8056	14.8766	14.4442	sp		776	877	14.2528	14.3746	-0.12184	Q6ZVF9	GRIN3_HUMAN	G protein-regulated inducer of neurite outgrowth 3 (GRIN3)	GPRIN3 KIAA2027	GPRIN3
16.6132	16.8518	16.6191	16.5166	16.657	16.8863	sp		392	1703	16.6298	16.7516	-0.121771	P21953	ODBB_HUMAN	2-oxoisovalerate dehydrogenase subunit beta, mitochondrial (EC 1.2.4.4) (Branched-chain alpha-keto acid dehydrogenase E1 component beta chain) (BCKDE1B) (BCKDH E1-beta)	BCKDHB	BCKDHB
15.2644	15.5259	15.4899	15.1186	15.3948	15.8698	tr		714	1152	15.383	15.5048	-0.121748	E9PG40	E9PG40_HUMAN	Amyloid-beta precursor protein	APP	APP
19.7563	19.8705	19.7124	19.8562	19.7155	19.8223	sp		427	229	19.7281	19.8497	-0.121584	O75955	FLOT1_HUMAN	Flotillin-1	FLOT1	FLOT1
20.5253	20.6694	20.5561	20.6772	20.5369	20.6345	sp		129	1551	20.5394	20.6604	-0.120934	P10606	COX5B_HUMAN	Cytochrome c oxidase subunit 5B, mitochondrial (Cytochrome c oxidase polypeptide Vb)	COX5B	COX5B
10.2783	12.9632	13.2361	11.7775	13.5416	12.6778	sp		486	2257	12.352	12.4728	-0.120829	P51608	MECP2_HUMAN	Methyl-CpG-binding protein 2 (MeCp-2 protein) (MeCp2)	MECP2	MECP2
14.9037	14.9684	15.0398	15.2175	15.0412	15.1607	sp		745	1569	14.9949	15.1155	-0.120646	P33897	ABCD1_HUMAN	ATP-binding cassette sub-family D member 1 (EC 7.6.2.4) (Adrenoleukodystrophy protein) (ALDP)	ABCD1 ALD	ABCD1
18.3423	18.454	18.3106	18.4125	18.3592	18.5073	sp		365	1235	18.3374	18.458	-0.120594	Q15366-3	PCBP2_HUMAN	Poly(rC)-binding protein 2 (Alpha-CP2) (Heterogeneous nuclear ribonucleoprotein E2) (hnRNP E2)	PCBP2	PCBP2
15.8286	16.033	15.8555	15.9368	15.9926	16.068	sp		652	1410	15.8922	16.0126	-0.120366	Q08357	S20A2_HUMAN	Sodium-dependent phosphate transporter 2 (Gibbon ape leukemia virus receptor 2) (GLVR-2) (Phosphate transporter 2) (PiT-2) (Pit2) (hPit2) (Solute carrier family 20 member 2)	SLC20A2 GLVR2 PIT2	SLC20A2
18.9181	19.0011	18.9265	19.0982	19.0067	19.1127	sp		145	1065	18.9504	19.0707	-0.120251	P39019	RS19_HUMAN	40S ribosomal protein S19 (Small ribosomal subunit protein eS19)	RPS19	RPS19
20.2492	20.386	20.2292	20.3749	20.2661	20.3432	tr		749	2417	20.2482	20.368	-0.119831	G3V325	G3V325_HUMAN	ATP5MF-PTCD1 readthrough	ATP5MF-PTCD1	ATP5MF-PTCD1
14.7239	15.1397	14.8123	15.8769	16.0087	14.887	sp		462	2453	15.1816	15.3012	-0.119576	Q9NVC3	S38A7_HUMAN	Putative sodium-coupled neutral amino acid transporter 7 (Solute carrier family 38 member 7)	SLC38A7 SNAT7	SLC38A7
18.6508	19.0044	18.8276	18.9044	18.9099	18.836	sp		704	305	18.7961	18.9149	-0.118811	Q12931	TRAP1_HUMAN	Heat shock protein 75 kDa, mitochondrial (HSP 75) (TNFR-associated protein 1) (Tumor necrosis factor type 1 receptor-associated protein) (TRAP-1)	TRAP1 HSP75	TRAP1
21.7245	21.7093	21.7071	21.6897	21.2851	21.6726	sp		673	37	21.5722	21.6905	-0.118282	P08133	ANXA6_HUMAN	Annexin A6 (67 kDa calelectrin) (Annexin VI) (Annexin-6) (Calphobindin-II) (CPB-II) (Chromobindin-20) (Lipocortin VI) (Protein III) (p68) (p70)	ANXA6 ANX6	ANXA6
19.5354	19.683	19.5976	19.7181	19.5833	19.6686	sp		1023	47	19.5721	19.6899	-0.117792	Q02218	ODO1_HUMAN	2-oxoglutarate dehydrogenase, mitochondrial (EC 1.2.4.2) (2-oxoglutarate dehydrogenase complex component E1) (OGDC-E1) (Alpha-ketoglutarate dehydrogenase)	OGDH	OGDH
15.3894	15.9685	15.4569	15.7373	16.0926	15.5857	sp		279	1461	15.6463	15.7639	-0.117552	Q68D91	MBLC2_HUMAN	Metallo-beta-lactamase domain-containing protein 2 (EC 3.-.-.-)	MBLAC2	MBLAC2
20.6907	20.8219	20.7072	20.847	20.7186	20.7992	tr		439	594	20.7055	20.8227	-0.117182	A0A0C4DGS1	A0A0C4DGS1_HUMAN	Dolichyl-diphosphooligosaccharide--protein glycosyltransferase 48 kDa subunit (Oligosaccharyl transferase 48 kDa subunit)	DDOST	DDOST
21.3536	21.4648	21.3468	21.4769	21.3665	21.4747	sp		654	124	21.3556	21.4722	-0.116539	P11021	BIP_HUMAN	Endoplasmic reticulum chaperone BiP (EC 3.6.4.10) (78 kDa glucose-regulated protein) (GRP-78) (Binding-immunoglobulin protein) (BiP) (Heat shock protein 70 family protein 5) (HSP70 family protein 5) (Heat shock protein family A member 5) (Immunoglobulin heavy chain-binding protein)	HSPA5 GRP78	HSPA5
20.2432	20.3701	20.2327	20.3831	20.2929	20.3626	sp		798	368	20.2563	20.3719	-0.115675	P05556	ITB1_HUMAN	Integrin beta-1 (Fibronectin receptor subunit beta) (Glycoprotein IIa) (GPIIA) (VLA-4 subunit beta) (CD antigen CD29)	ITGB1 FNRB MDF2 MSK12	ITGB1
16.2773	16.2161	16.2358	15.7255	15.385	16.3025	sp		203	1313	15.966	16.0814	-0.115336	P07203	GPX1_HUMAN	Glutathione peroxidase 1 (GPx-1) (GSHPx-1) (EC 1.11.1.9) (Cellular glutathione peroxidase)	GPX1	GPX1
20.8406	20.9708	20.8722	20.9951	20.8556	20.9474	sp		453	540	20.8561	20.9711	-0.114946	P36957	ODO2_HUMAN	Dihydrolipoyllysine-residue succinyltransferase component of 2-oxoglutarate dehydrogenase complex, mitochondrial (EC 2.3.1.61) (2-oxoglutarate dehydrogenase complex component E2) (OGDC-E2) (Dihydrolipoamide succinyltransferase component of 2-oxoglutarate dehydrogenase complex) (E2K)	DLST DLTS	DLST
15.3502	15.4869	15.483	15.613	15.5515	15.6295	tr		121	2104	15.4616	15.5765	-0.11489	A0A087WYP2	A0A087WYP2_HUMAN	Selenoprotein H	SELENOH	SELENOH
14.1111	14.5008	14.2169	12.1097	12.0581	14.1197	sp		576	2579	13.4621	13.5767	-0.114691	Q4G176	ACSF3_HUMAN	Malonate--CoA ligase ACSF3, mitochondrial (EC 6.2.1.n3) (Acyl-CoA synthetase family member 3)	ACSF3 PSEC0197	ACSF3
15.9446	15.8981	15.6699	16.2228	15.9114	15.748	tr		711	1724	15.8419	15.9563	-0.114388	A0A0A0MSI8	A0A0A0MSI8_HUMAN	Exocyst complex component 5	EXOC5	EXOC5
19.0404	19.1845	19.0202	19.1282	19.0092	19.1002	sp		437	486	19.0233	19.1376	-0.114325	Q16181	SEPT7_HUMAN	Septin-7 (CDC10 protein homolog)	SEPTIN7 CDC10 SEPT7	SEPTIN7
18.4052	18.6428	18.6659	18.6439	18.5697	18.6959	sp		125	1945	18.5469	18.6609	-0.113977	P62899	RL31_HUMAN	60S ribosomal protein L31 (Large ribosomal subunit protein eL31)	RPL31	RPL31
19.2467	19.4137	19.2151	19.322	19.3111	19.3765	sp		166	700	19.2576	19.3708	-0.113117	P23528	COF1_HUMAN	Cofilin-1 (18 kDa phosphoprotein) (p18) (Cofilin, non-muscle isoform)	CFL1 CFL	CFL1
20.1037	20.2504	20.1137	20.2298	20.1561	20.2315	tr		483	304	20.1245	20.2372	-0.112707	E7EMK3	E7EMK3_HUMAN	Flotillin-2	FLOT2	FLOT2
17.272	17.4367	17.3888	17.4362	17.2408	17.3657	sp		325	844	17.3005	17.4129	-0.112339	Q13347	EIF3I_HUMAN	Eukaryotic translation initiation factor 3 subunit I (eIF3i) (Eukaryotic translation initiation factor 3 subunit 2) (TGF-beta receptor-interacting protein 1) (TRIP-1) (eIF-3-beta) (eIF3 p36)	EIF3I EIF3S2 TRIP1	EIF3I
13.2242	13.4202	13.2814	13.2111	13.057	13.2669	sp		1604	2529	13.1875	13.2994	-0.111903	Q07092	COGA1_HUMAN	Collagen alpha-1(XVI) chain	COL16A1 FP1572	COL16A1
19.7144	19.8666	19.7315	19.7865	19.7043	19.8322	tr		194	590	19.7167	19.8284	-0.111698	A0A024R4M0	A0A024R4M0_HUMAN	40S ribosomal protein S9 (Ribosomal protein S9, isoform CRA_a)	RPS9 hCG_2009111	RPS9
19.9011	20.0137	19.8583	20.0005	19.9505	20.0297	sp		188	1610	19.9033	20.0146	-0.11134	O75915	PRAF3_HUMAN	PRA1 family protein 3 (ADP-ribosylation factor-like protein 6-interacting protein 5) (ARL-6-interacting protein 5) (Aip-5) (Cytoskeleton-related vitamin A-responsive protein) (Dermal papilla-derived protein 11) (GTRAP3-18) (Glutamate transporter EAAC1-interacting protein) (JM5) (Prenylated Rab acceptor protein 2) (Protein JWa) (Putative MAPK-activating protein PM27)	ARL6IP5 DERP11 JWA PRA2 PRAF3 HSPC127	ARL6IP5
13.6344	13.7983	13.7373	13.5591	13.7804	14.1275	sp		913	2607	13.7174	13.8283	-0.110924	Q5JSH3	WDR44_HUMAN	WD repeat-containing protein 44 (Rabphilin-11)	WDR44	WDR44
15.6959	15.614	15.6038	15.7687	15.4899	15.7393	tr		449	1739	15.5965	15.7073	-0.110811	J3KQL8	J3KQL8_HUMAN	Apolipoprotein L2	APOL2	APOL2
16.6264	14.9521	14.9771	16.9269	16.6247	16.6802	sp		197	1957	16.0761	16.1864	-0.110296	P61758	PFD3_HUMAN	Prefoldin subunit 3 (HIBBJ46) (von Hippel-Lindau-binding protein 1) (VBP-1) (VHL-binding protein 1)	VBP1 PFDN3	VBP1
19.5503	19.6887	19.5826	19.6588	19.5437	19.6588	sp		176	1320	19.5588	19.6688	-0.109921	Q02543	RL18A_HUMAN	60S ribosomal protein L18a (Large ribosomal subunit protein eL20)	RPL18A	RPL18A
16.3109	16.8358	16.7429	16.8215	16.5871	16.3133	sp		707	2018	16.547	16.6569	-0.109884	Q9BU23	LMF2_HUMAN	Lipase maturation factor 2 (Transmembrane protein 112B) (Transmembrane protein 153)	LMF2 TMEM112B TMEM153	LMF2
13.9265	14.4819	13.9015	14.515	14.4215	13.5806	sp		403	2245	14.0832	14.1925	-0.109339	Q5EBL4	RIPL1_HUMAN	RILP-like protein 1 (Rab-interacting lysosomal-like protein 1)	RILPL1 RLP1	RILPL1
19.4716	19.5504	19.4676	19.5693	19.4807	19.6279	sp		158	879	19.4733	19.5826	-0.109249	P62280	RS11_HUMAN	40S ribosomal protein S11 (Small ribosomal subunit protein uS17)	RPS11	RPS11
18.4196	18.5681	18.4325	18.5637	18.537	18.5835	sp		658	298	18.4631	18.5718	-0.108713	P23786	CPT2_HUMAN	Carnitine O-palmitoyltransferase 2, mitochondrial (EC 2.3.1.21) (Carnitine palmitoyltransferase II) (CPT II)	CPT2 CPT1	CPT2
17.2874	17.2749	17.2138	17.4214	17.2945	17.4241	tr		143	1722	17.2652	17.3735	-0.108221	B0QYF8	B0QYF8_HUMAN	Myoglobin (Fragment)	MB	MB
16.6616	16.5464	14.0328	13.9053	12.514	13.0814	sp		299	2611	14.4028	14.511	-0.108206	Q92600	CNOT9_HUMAN	CCR4-NOT transcription complex subunit 9 (Cell differentiation protein RQCD1 homolog) (Rcd-1)	CNOT9 RCD1 RQCD1	CNOT9
18.4965	18.5731	18.5681	18.6848	18.4818	18.6131	sp		318	504	18.5155	18.6237	-0.108198	P27695	APEX1_HUMAN	DNA-(apurinic or apyrimidinic site) lyase (EC 3.1.-.-) (EC 4.2.99.18) (APEX nuclease) (APEN) (Apurinic-apyrimidinic endonuclease 1) (AP endonuclease 1) (APE-1) (REF-1) (Redox factor-1) [Cleaved into: DNA-(apurinic or apyrimidinic site) lyase, mitochondrial]	APEX1 APE APE1 APEX APX HAP1 REF1	APEX1
20.5026	20.6209	20.4734	20.5689	20.4894	20.5989	sp		333	496	20.4884	20.5962	-0.10775	P13804	ETFA_HUMAN	Electron transfer flavoprotein subunit alpha, mitochondrial (Alpha-ETF)	ETFA	ETFA
16.9188	16.9281	16.8417	17.2285	17.0967	17.0236	sp		128	2485	16.9524	17.0601	-0.10766	P0C0S5	H2AZ_HUMAN	Histone H2A.Z (H2A/z)	H2AFZ H2AZ	H2AFZ
18.8822	18.9344	18.9431	19.0838	18.9672	19.097	sp		586	389	18.9309	19.0384	-0.107546	Q9UHD8-2	SEPT9_HUMAN	Septin-9 (MLL septin-like fusion protein MSF-A) (MLL septin-like fusion protein) (Ovarian/Breast septin) (Ov/Br septin) (Septin D1)	SEPTIN9 KIAA0991 MSF SEPT9	SEPTIN9
21.4994	21.5896	21.4775	21.6195	21.4844	21.5739	sp		301	227	21.4871	21.5943	-0.107176	P00387-2	NB5R3_HUMAN	NADH-cytochrome b5 reductase 3 (B5R) (Cytochrome b5 reductase) (EC 1.6.2.2) (Diaphorase-1) [Cleaved into: NADH-cytochrome b5 reductase 3 membrane-bound form;NADH-cytochrome b5 reductase 3 soluble form]	CYB5R3 DIA1	CYB5R3
16.9403	17.0191	16.9391	17.0095	16.922	17.0938	sp		1735	182	16.9338	17.0408	-0.10705	Q9HBL0	TENS1_HUMAN	Tensin-1	TNS1 TNS	TNS1
15.7584	15.8494	15.7833	15.9397	15.8292	15.9013	sp		280	1938	15.7903	15.8968	-0.106508	Q9H3N1	TMX1_HUMAN	Thioredoxin-related transmembrane protein 1 (Thioredoxin domain-containing protein 1) (Transmembrane Trx-related protein)	TMX1 TMX TXNDC TXNDC1 PSEC0085 UNQ235/PRO268	TMX1
20.3315	20.4157	20.3453	20.3217	20.3494	20.6076	sp		213	753	20.342	20.4483	-0.106268	P48047	ATPO_HUMAN	ATP synthase subunit O, mitochondrial (ATP synthase peripheral stalk subunit OSCP) (Oligomycin sensitivity conferral protein) (OSCP)	ATP5PO ATP5O ATPO	ATP5PO
18.0369	18.149	18.1136	18.2085	18.1435	18.2549	tr		187	728	18.098	18.2041	-0.106138	A0A087WT47	A0A087WT47_HUMAN	Troponin I, slow skeletal muscle	TNNI1	TNNI1
18.4094	18.552	18.4432	18.4927	18.468	18.5927	tr		292	1148	18.4402	18.5458	-0.105576	G3V4C1	G3V4C1_HUMAN	Heterogeneous nuclear ribonucleoproteins C1/C2	HNRNPC	HNRNPC
16.5911	16.6102	16.1177	16.4397	16.622	16.5972	sp		594	1667	16.4436	16.5491	-0.105457	Q6UN15-3	FIP1_HUMAN	Pre-mRNA 3'-end-processing factor FIP1 (hFip1) (FIP1-like 1 protein) (Factor interacting with PAP) (Rearranged in hypereosinophilia)	FIP1L1 FIP1 RHE	FIP1L1
18.106	18.2115	18.2175	18.2799	18.2398	18.3882	sp		165	1593	18.1878	18.2932	-0.105444	P30050	RL12_HUMAN	60S ribosomal protein L12 (Large ribosomal subunit protein uL11)	RPL12	RPL12
16.6381	16.5661	16.498	16.579	16.4472	16.7545	tr		283	1496	16.5278	16.6332	-0.105408	D6RD18	D6RD18_HUMAN	Heterogeneous nuclear ribonucleoprotein A/B	HNRNPAB	HNRNPAB
18.8674	18.9316	18.8484	19.0049	18.8086	18.9039	sp		164	1535	18.8415	18.9468	-0.105328	P84103	SRSF3_HUMAN	Serine/arginine-rich splicing factor 3 (Pre-mRNA-splicing factor SRP20) (Splicing factor, arginine/serine-rich 3)	SRSF3 SFRS3 SRP20	SRSF3
15.7492	16.0448	15.4922	15.9035	15.7133	15.3223	sp		508	1695	15.6516	15.7569	-0.105305	Q92575	UBXN4_HUMAN	UBX domain-containing protein 4 (Erasin) (UBX domain-containing protein 2)	UBXN4 KIAA0242 UBXD2 UBXDC1	UBXN4
19.1822	19.2562	19.1954	19.3491	19.2884	19.3764	sp		136	1522	19.222	19.3272	-0.105251	P37108	SRP14_HUMAN	Signal recognition particle 14 kDa protein (SRP14) (18 kDa Alu RNA-binding protein)	SRP14	SRP14
18.6802	18.8268	18.7383	18.8599	18.7413	18.7882	sp		264	522	18.7199	18.825	-0.105047	P61247	RS3A_HUMAN	40S ribosomal protein S3a (Small ribosomal subunit protein eS1) (v-fos transformation effector protein) (Fte-1)	RPS3A FTE1 MFTL	RPS3A
14.9211	15.0403	15.0936	15.1008	14.8998	15.0876	sp		92	2578	14.9715	15.0762	-0.104718	Q9P2X0-2	DPM3_HUMAN	Dolichol-phosphate mannosyltransferase subunit 3 (Dolichol-phosphate mannose synthase subunit 3) (DPM synthase subunit 3) (Dolichyl-phosphate beta-D-mannosyltransferase subunit 3) (Mannose-P-dolichol synthase subunit 3) (MPD synthase subunit 3) (Prostin-1)	DPM3	DPM3
16.9322	17.1291	16.9788	16.986	17.135	17.2444	sp		709	1720	17.0153	17.1198	-0.10453	Q92542	NICA_HUMAN	Nicastrin	NCSTN KIAA0253 UNQ1874/PRO4317	NCSTN
14.2117	14.0732	9.6735	10.4149	12.2724	11.9831	sp		89	2555	12.0525	12.1571	-0.104515	O75531	BAF_HUMAN	Barrier-to-autointegration factor (Breakpoint cluster region protein 1) [Cleaved into: Barrier-to-autointegration factor, N-terminally processed]	BANF1 BAF BCRG1	BANF1
15.2021	15.4684	15.4083	15.3692	15.3321	15.4184	sp		274	2099	15.3142	15.4187	-0.10448	Q9H0E2	TOLIP_HUMAN	Toll-interacting protein	TOLLIP	TOLLIP
15.6321	15.7365	15.3134	15.5908	15.8543	15.7851	sp		212	2345	15.5999	15.7041	-0.104198	P45877	PPIC_HUMAN	Peptidyl-prolyl cis-trans isomerase C (PPIase C) (EC 5.2.1.8) (Cyclophilin C) (Rotamase C)	PPIC CYPC	PPIC
19.2622	19.4123	19.2458	19.3744	19.3108	19.3408	sp		NaN	246	19.2729	19.3758	-0.102903	Q12797	ASPH_HUMAN
16.5752	16.5215	16.5249	16.6201	16.3633	16.6293	sp		306	1675	16.4878	16.5903	-0.102468	Q86U42-2	PABP2_HUMAN	Polyadenylate-binding protein 2 (PABP-2) (Poly(A)-binding protein 2) (Nuclear poly(A)-binding protein 1) (Poly(A)-binding protein II) (PABII) (Polyadenylate-binding nuclear protein 1)	PABPN1 PAB2 PABP2	PABPN1
18.9465	19.0422	18.8111	19.028	19.0493	19.0427	sp		111	971	18.9356	19.0376	-0.102028	P14927	QCR7_HUMAN	Cytochrome b-c1 complex subunit 7 (Complex III subunit 7) (Complex III subunit VII) (QP-C) (Ubiquinol-cytochrome c reductase complex 14 kDa protein)	UQCRB UQBP	UQCRB
19.6482	19.7218	19.737	19.8598	19.7367	19.8452	tr		423	480	19.7073	19.8089	-0.101635	A0A0A0MT83	A0A0A0MT83_HUMAN	Isovaleryl-CoA dehydrogenase isoform 1 (Isovaleryl-CoA dehydrogenase, mitochondrial)	IVD	IVD
15.599	15.9606	15.9352	15.898	15.9673	15.9474	sp		283	698	15.8339	15.9354	-0.101495	Q9Y277	VDAC3_HUMAN	Voltage-dependent anion-selective channel protein 3 (VDAC-3) (hVDAC3) (Outer mitochondrial membrane protein porin 3)	VDAC3	VDAC3
15.4599	15.3566	15.7361	15.6381	15.2279	15.7322	sp		1498	1153	15.4746	15.5756	-0.100969	Q08378	GOGA3_HUMAN	Golgin subfamily A member 3 (Golgi complex-associated protein of 170 kDa) (GCP170) (Golgin-160)	GOLGA3	GOLGA3
17.2566	17.2854	17.1647	17.3188	17.133	17.2514	sp		463	1089	17.1848	17.2852	-0.100395	Q9H9P8	L2HDH_HUMAN	L-2-hydroxyglutarate dehydrogenase, mitochondrial (EC 1.1.99.2) (Duranin)	L2HGDH C14orf160	L2HGDH
15.3086	15.972	15.7337	15.4897	15.6747	15.5563	sp		1436	1104	15.5723	15.6727	-0.10033	Q12769	NU160_HUMAN	Nuclear pore complex protein Nup160 (160 kDa nucleoporin) (Nucleoporin Nup160)	NUP160 KIAA0197 NUP120	NUP160
17.1129	17.1241	17.0088	17.1402	17.0592	17.2165	sp		2012	381	17.0603	17.1603	-0.0999966	Q92621	NU205_HUMAN	Nuclear pore complex protein Nup205 (205 kDa nucleoporin) (Nucleoporin Nup205)	NUP205 C7orf14 KIAA0225	NUP205
18.1264	18.2338	18.1509	18.0986	18.0704	18.3149	sp		246	964	18.1159	18.2158	-0.0998707	Q00059	TFAM_HUMAN	Transcription factor A, mitochondrial (mtTFA) (Mitochondrial transcription factor 1) (MtTF1) (Transcription factor 6) (TCF-6) (Transcription factor 6-like 2)	TFAM TCF6 TCF6L2	TFAM
18.7006	18.7695	18.596	18.7752	18.6614	18.7126	sp		558	1293	18.6527	18.7524	-0.0997295	Q9NPH2	INO1_HUMAN	Inositol-3-phosphate synthase 1 (IPS 1) (EC 5.5.1.4) (Myo-inositol 1-phosphate synthase) (MI-1-P synthase) (MIP synthase) (hIPS) (Myo-inositol 1-phosphate synthase A1) (hINO1)	ISYNA1 INO1	ISYNA1
15.5551	15.5015	15.5472	15.5599	15.097	15.4367	tr		93	2408	15.3997	15.4994	-0.0996218	D6RAN8	D6RAN8_HUMAN	39S ribosomal protein L27, mitochondrial (Mitochondrial ribosomal protein L27, isoform CRA_c)	MRPL27 hCG_29617	MRPL27
20.1974	20.3022	20.195	20.2894	20.247	20.3464	sp		208	1071	20.2131	20.3126	-0.0995293	P62241	RS8_HUMAN	40S ribosomal protein S8 (Small ribosomal subunit protein eS8)	RPS8 OK/SW-cl.83	RPS8
19.0129	19.0946	19.0018	19.1095	18.9799	19.0888	tr		181	1713	18.9982	19.0976	-0.0994549	F8WCF6	F8WCF6_HUMAN	Actin-related protein 2/3 complex subunit 4	ARPC4-TTLL3	ARPC4-TTLL3
17.1407	17.2254	17.1378	17.2669	17.0691	17.1532	sp		189	2283	17.1159	17.2152	-0.099329	P01111	RASN_HUMAN	GTPase NRas (Transforming protein N-Ras)	NRAS HRAS1	NRAS
16.6641	16.5352	16.2146	16.6734	16.6444	16.6125	sp		475	956	16.5077	16.6071	-0.0993176	Q96KP4	CNDP2_HUMAN	Cytosolic non-specific dipeptidase (EC 3.4.13.18) (CNDP dipeptidase 2) (Carnosine dipeptidase II) (Epididymis secretory protein Li 13) (Glutamate carboxypeptidase-like protein 1) (Peptidase A)	CNDP2 CN2 CPGL HEL-S-13 PEPA	CNDP2
15.6691	15.3114	15.2649	15.8424	15.8483	15.925	sp		1270	821	15.5941	15.6929	-0.0988207	Q9ULD2	MTUS1_HUMAN	Microtubule-associated tumor suppressor 1 (AT2 receptor-binding protein) (Angiotensin-II type 2 receptor-interacting protein) (Mitochondrial tumor suppressor 1)	MTUS1 ATBP ATIP GK1 KIAA1288 MTSG1	MTUS1
14.2359	13.8381	13.6036	14.0787	14.2456	14.4645	sp		193	2302	14.0284	14.1271	-0.0987148	P61601	NCALD_HUMAN	Neurocalcin-delta	NCALD	NCALD
17.8255	17.9679	17.8984	17.9649	17.8482	17.9345	sp		618	482	17.8574	17.9558	-0.098423	Q8IXI2-7	MIRO1_HUMAN	Mitochondrial Rho GTPase 1 (MIRO-1) (hMiro-1) (EC 3.6.5.-) (Rac-GTP-binding protein-like protein) (Ras homolog gene family member T1)	RHOT1 ARHT1	RHOT1
17.1041	16.9475	17.0551	17.0688	16.6019	17.0388	sp		739	780	16.9203	17.0183	-0.0980053	P41250	GARS_HUMAN	Glycine--tRNA ligase (EC 6.1.1.14) (Diadenosine tetraphosphate synthetase) (Ap4A synthetase) (EC 2.7.7.-) (Glycyl-tRNA synthetase) (GlyRS)	GARS	GARS
18.1129	18.1332	18.2153	17.9548	17.4697	18.0037	sp		559	571	17.9326	18.0306	-0.0979252	Q9NVH1	DJC11_HUMAN	DnaJ homolog subfamily C member 11	DNAJC11	DNAJC11
15.9722	16.265	15.9486	15.8844	16.0468	16.1116	sp		166	1990	15.9892	16.087	-0.0978346	Q13405	RM49_HUMAN	39S ribosomal protein L49, mitochondrial (L49mt) (MRP-L49) (Mitochondrial large ribosomal subunit protein mL49) (Neighbor of FAU) (NOF) (Protein NOF1)	MRPL49 C11orf4 NOF1 OK/SW-cl.67	MRPL49
12.0015	13.0171	14.8359	14.4942	15.0458	14.6652	sp		208	2101	13.9611	14.0588	-0.0977678	O14807	RASM_HUMAN	Ras-related protein M-Ras (Ras-related protein R-Ras3)	MRAS RRAS3	MRAS
16.2327	16.1612	15.599	16.2151	16.3895	16.1364	sp		1217	216	16.0737	16.1709	-0.0971832	Q9UQE7	SMC3_HUMAN	Structural maintenance of chromosomes protein 3 (SMC protein 3) (SMC-3) (Basement membrane-associated chondroitin proteoglycan) (Bamacan) (Chondroitin sulfate proteoglycan 6) (Chromosome-associated polypeptide) (hCAP)	SMC3 BAM BMH CSPG6 SMC3L1	SMC3
15.5224	15.638	15.52	15.6546	15.6402	15.6809	sp		445	1771	15.5608	15.6579	-0.0970087	O95674	CDS2_HUMAN	Phosphatidate cytidylyltransferase 2 (EC 2.7.7.41) (CDP-DAG synthase 2) (CDP-DG synthase 2) (CDP-diacylglycerol synthase 2) (CDS 2) (CDP-diglyceride pyrophosphorylase 2) (CDP-diglyceride synthase 2) (CTP:phosphatidate cytidylyltransferase 2)	CDS2	CDS2
20.486	20.5855	20.4982	20.6011	20.4857	20.5737	sp		463	357	20.49	20.5867	-0.0967369	Q9P2R7	SUCB1_HUMAN	Succinate--CoA ligase [ADP-forming] subunit beta, mitochondrial (EC 6.2.1.5) (ATP-specific succinyl-CoA synthetase subunit beta) (A-SCS) (Succinyl-CoA synthetase beta-A chain) (SCS-betaA)	SUCLA2	SUCLA2
18.5993	18.5117	18.5352	18.6182	18.352	18.6443	sp		1170	413	18.4955	18.5914	-0.0959187	P07996	TSP1_HUMAN	Thrombospondin-1 (Glycoprotein G)	THBS1 TSP TSP1	THBS1
17.1818	17.6388	17.8484	17.5103	17.5012	17.6698	sp		245	717	17.5104	17.6063	-0.09585	Q9NX40	OCAD1_HUMAN	OCIA domain-containing protein 1 (Ovarian cancer immunoreactive antigen domain containing 1) (Ovarian carcinoma immunoreactive antigen)	OCIAD1 ASRIJ OCIA	OCIAD1
17.3725	17.3573	17.351	17.4945	17.3295	17.4883	sp		617	395	17.351	17.4467	-0.0957298	Q16134	ETFD_HUMAN	Electron transfer flavoprotein-ubiquinone oxidoreductase, mitochondrial (ETF-QO) (ETF-ubiquinone oxidoreductase) (EC 1.5.5.1) (Electron-transferring-flavoprotein dehydrogenase) (ETF dehydrogenase)	ETFDH	ETFDH
18.6281	18.7413	18.608	18.68	18.6209	18.7209	sp		814	397	18.619	18.7141	-0.0950527	P55884	EIF3B_HUMAN	Eukaryotic translation initiation factor 3 subunit B (eIF3b) (Eukaryotic translation initiation factor 3 subunit 9) (Prt1 homolog) (hPrt1) (eIF-3-eta) (eIF3 p110) (eIF3 p116)	EIF3B EIF3S9	EIF3B
17.7571	17.8663	17.749	17.88	17.8211	17.8642	tr		1076	188	17.7757	17.8702	-0.0944138	C9JME2	C9JME2_HUMAN	FERM, ARHGEF and pleckstrin domain-containing protein 1	FARP1	FARP1
14.8191	15.6835	16.1593	15.7523	15.8486	15.6743	sp		780	601	15.609	15.7034	-0.0943546	O43815	STRN_HUMAN	Striatin	STRN	STRN
16.1594	16.2754	16.0858	16.2187	16.1357	16.1685	sp		98	2087	16.127	16.2209	-0.0939045	P04080	CYTB_HUMAN	Cystatin-B (CPI-B) (Liver thiol proteinase inhibitor) (Stefin-B)	CSTB CST6 STFB	CSTB
15.4343	15.6256	15.409	15.4699	15.4306	15.4598	sp		291	2387	15.4246	15.5185	-0.0938406	Q8WWC4	MAIP1_HUMAN	m-AAA protease-interacting protein 1, mitochondrial (Matrix AAA peptidase-interacting protein 1)	MAIP1 C2orf47	MAIP1
17.0058	17.051	16.8857	17.078	17.0984	17.1418	sp		731	882	16.9966	17.0903	-0.0936356	Q96AQ6	PBIP1_HUMAN	Pre-B-cell leukemia transcription factor-interacting protein 1 (Hematopoietic PBX-interacting protein)	PBXIP1 HPIP	PBXIP1
19.3609	19.4417	19.3282	19.4142	19.3147	19.425	sp		249	1230	19.3346	19.427	-0.0923767	P62753	RS6_HUMAN	40S ribosomal protein S6 (Phosphoprotein NP33) (Small ribosomal subunit protein eS6)	RPS6 OK/SW-cl.2	RPS6
13.9417	14.4768	14.376	14.1058	14.2826	14.2939	tr		211	2564	14.2001	14.2922	-0.0920658	H3BV80	H3BV80_HUMAN	RNA-binding protein with serine-rich domain 1	RNPS1	RNPS1
16.5622	16.7203	16.6987	16.7136	16.6453	16.7477	tr		1560	242	16.6354	16.7272	-0.0917835	E7EUU4	E7EUU4_HUMAN	Eukaryotic translation initiation factor 4 gamma 1	EIF4G1	EIF4G1
16.685	16.8209	16.7344	16.7605	16.7984	16.9112	sp		117	1910	16.7393	16.8309	-0.0916119	P49207	RL34_HUMAN	60S ribosomal protein L34 (Large ribosomal subunit protein eL34)	RPL34	RPL34
18.2979	18.4064	18.0587	18.0991	18.3424	18.4681	sp		494	776	18.233	18.3245	-0.0915356	P49189	AL9A1_HUMAN	4-trimethylaminobutyraldehyde dehydrogenase (TMABA-DH) (TMABALDH) (EC 1.2.1.47) (Aldehyde dehydrogenase E3 isozyme) (Aldehyde dehydrogenase family 9 member A1) (EC 1.2.1.3) (Gamma-aminobutyraldehyde dehydrogenase) (EC 1.2.1.19) (R-aminobutyraldehyde dehydrogenase) [Cleaved into: 4-trimethylaminobutyraldehyde dehydrogenase, N-terminally processed]	ALDH9A1 ALDH4 ALDH7 ALDH9	ALDH9A1
17.9804	18.2389	17.9889	18.1146	18.1567	18.0457	sp		1304	68	18.042	18.1331	-0.0910873	O75533	SF3B1_HUMAN	Splicing factor 3B subunit 1 (Pre-mRNA-splicing factor SF3b 155 kDa subunit) (SF3b155) (Spliceosome-associated protein 155) (SAP 155)	SF3B1 SAP155	SF3B1
12.1063	13.6192	13.1761	12.4558	13.6094	13.0898	sp		510	2444	12.9639	13.0549	-0.0910311	Q9UKZ1	CNO11_HUMAN	CCR4-NOT transcription complex subunit 11	CNOT11 C2orf29 C40	CNOT11
18.8409	18.9593	18.9104	18.9826	18.8914	18.9738	sp		375	898	18.8809	18.9719	-0.0909824	P35659	DEK_HUMAN	Protein DEK	DEK	DEK
14.7641	14.488	14.4683	15.3044	14.87	14.5829	sp		572	996	14.7008	14.7917	-0.0909405	O14531	DPYL4_HUMAN	Dihydropyrimidinase-related protein 4 (DRP-4) (Collapsin response mediator protein 3) (CRMP-3) (UNC33-like phosphoprotein 4) (ULIP-4)	DPYSL4 CRMP3 ULIP4	DPYSL4
15.47	15.5868	15.5623	15.7219	15.5906	15.5868	sp		418	842	15.541	15.6318	-0.0908213	P31323	KAP3_HUMAN	cAMP-dependent protein kinase type II-beta regulatory subunit	PRKAR2B	PRKAR2B
17.4856	17.5144	17.4142	17.6076	17.5465	17.5943	tr		225	1449	17.4821	17.5721	-0.0899868	C9JJ19	C9JJ19_HUMAN	28S ribosomal protein S34, mitochondrial	MRPS34	MRPS34
15.9778	16.5359	16.5531	16.4425	16.6261	16.4472	tr		533	1408	16.3857	16.4752	-0.0895367	F2Z2V0	F2Z2V0_HUMAN	Copine-1 (Fragment)	CPNE1	CPNE1
16.1023	16.3084	16.0812	16.297	15.8496	15.6958	sp		760	797	16.011	16.1004	-0.0893745	Q9UGP8	SEC63_HUMAN	Translocation protein SEC63 homolog	SEC63 SEC63L	SEC63
20.1246	20.1597	20.0398	20.0618	20.0499	20.2603	sp		264	697	20.0715	20.1606	-0.0891476	O75489	NDUS3_HUMAN	NADH dehydrogenase [ubiquinone] iron-sulfur protein 3, mitochondrial (EC 1.6.99.3) (EC 7.1.1.2) (Complex I-30kD) (CI-30kD) (NADH-ubiquinone oxidoreductase 30 kDa subunit)	NDUFS3	NDUFS3
15.857	15.7692	15.1371	16.0231	15.8869	15.3559	sp		145	2077	15.627	15.7161	-0.0890818	Q6P1L8	RM14_HUMAN	39S ribosomal protein L14, mitochondrial (L14mt) (MRP-L14) (39S ribosomal protein L32, mitochondrial) (L32mt) (MRP-L32) (Mitochondrial large ribosomal subunit protein uL14m)	MRPL14 MRPL32 RPML32	MRPL14
15.2425	15.2879	15.2371	15.4445	15.4279	15.4424	sp		247	1561	15.3025	15.3916	-0.0890808	Q9BS92	NPS3B_HUMAN	Protein NipSnap homolog 3B (NipSnap3B) (SNAP1)	NIPSNAP3B NIPSNAP3	NIPSNAP3B
19.0389	19.1147	19.0319	19.1316	19.0274	19.1176	tr		200	1296	19.0327	19.1213	-0.0885582	M0R0F0	M0R0F0_HUMAN	40S ribosomal protein S5 (Fragment)	RPS5	RPS5
16.7632	16.5305	16.2417	16.0989	15.9848	16.6243	sp		166	1818	16.3299	16.4179	-0.087986	Q9UDX5	MTFP1_HUMAN	Mitochondrial fission process protein 1 (Mitochondrial 18 kDa protein) (MTP18)	MTFP1 MTP18 HSPC242 My022	MTFP1
16.3636	16.5057	16.3231	16.5434	16.6531	16.5547	sp		504	1162	16.4466	16.5346	-0.0879822	Q16401	PSMD5_HUMAN	26S proteasome non-ATPase regulatory subunit 5 (26S protease subunit S5 basic) (26S proteasome subunit S5B)	PSMD5 KIAA0072	PSMD5
18.3251	18.3082	16.892	17.0987	18.1762	18.2497	tr		141	1714	17.7977	17.8855	-0.0877705	H7C525	H7C525_HUMAN	Coiled-coil domain-containing protein 58 (Fragment)	CCDC58	CCDC58
17.9522	18.0564	18.0149	18.1072	18.0385	18.1048	sp		180	2320	18.0019	18.0895	-0.0875912	P61009	SPCS3_HUMAN	Signal peptidase complex subunit 3 (EC 3.4.-.-) (Microsomal signal peptidase 22/23 kDa subunit) (SPC22/23) (SPase 22/23 kDa subunit)	SPCS3 SPC22 UNQ1841/PRO3567	SPCS3
16.7028	16.7618	16.8554	17.0026	16.9805	17.036	sp		115	2075	16.8462	16.9334	-0.0872288	P62854	RS26_HUMAN	40S ribosomal protein S26 (Small ribosomal subunit protein eS26)	RPS26	RPS26
14.391	14.5685	14.4762	14.5386	14.489	14.5097	sp		104	1807	14.452	14.5389	-0.0868778	P84090	ERH_HUMAN	Enhancer of rudimentary homolog	ERH	ERH
14.8901	15.5245	15.3484	15.5344	15.6087	15.0484	sp		359	1061	15.2824	15.3691	-0.0867033	P28289	TMOD1_HUMAN	Tropomodulin-1 (Erythrocyte tropomodulin) (E-Tmod)	TMOD1 D9S57E TMOD	TMOD1
15.9167	15.9964	15.8508	15.9268	15.8381	15.9423	tr		148	2449	15.8685	15.9552	-0.0866451	B1AKR6	B1AKR6_HUMAN	Dynein light chain roadblock-type 1	DYNLRB1	DYNLRB1
17.9193	18.0525	17.9089	17.9881	17.868	17.912	sp		178	2080	17.8988	17.9842	-0.0854416	P62913	RL11_HUMAN	60S ribosomal protein L11 (CLL-associated antigen KW-12) (Large ribosomal subunit protein uL5)	RPL11	RPL11
15.5768	15.2602	15.2444	15.2587	14.898	15.4566	sp		340	1599	15.2398	15.3252	-0.0854092	Q8N0X4	CLYBL_HUMAN	Citramalyl-CoA lyase, mitochondrial (EC 4.1.3.25) ((3S)-malyl-CoA thioesterase) (EC 3.1.2.30) (Beta-methylmalate synthase) (EC 2.3.3.-) (Citrate lyase subunit beta-like protein) (Citrate lyase beta-like) (Malate synthase) (EC 2.3.3.9)	CLYBL CLB	CLYBL
19.3385	19.4999	19.4326	19.5332	19.3799	19.3737	sp		223	962	19.3837	19.4689	-0.085247	P27144	KAD4_HUMAN	Adenylate kinase 4, mitochondrial (AK 4) (EC 2.7.4.10) (EC 2.7.4.6) (Adenylate kinase 3-like) (GTP:AMP phosphotransferase AK4)	AK4 AK3 AK3L1	AK4
19.9468	20.0015	19.9565	20.0216	19.9023	20.0364	sp		634	394	19.9352	20.0199	-0.0846748	Q9NVI7-2	ATD3A_HUMAN	ATPase family AAA domain-containing protein 3A	ATAD3A	ATAD3A
17.6874	17.7399	17.6294	17.7572	17.7031	17.7755	sp		81	2359	17.6733	17.7575	-0.0842209	O00483	NDUA4_HUMAN	Cytochrome c oxidase subunit NDUFA4 (Complex I-MLRQ) (CI-MLRQ) (NADH-ubiquinone oxidoreductase MLRQ subunit)	NDUFA4	NDUFA4
18.1757	18.2827	18.0816	18.2062	18.0872	18.1066	sp		796	411	18.1148	18.1985	-0.083704	Q96QK1	VPS35_HUMAN	Vacuolar protein sorting-associated protein 35 (hVPS35) (Maternal-embryonic 3) (Vesicle protein sorting 35)	VPS35 MEM3 TCCCTA00141	VPS35
19.6456	19.8014	19.7424	19.7336	19.6401	19.7435	sp		539	269	19.676	19.7595	-0.0834675	P50991	TCPD_HUMAN	T-complex protein 1 subunit delta (TCP-1-delta) (CCT-delta) (Stimulator of TAR RNA-binding)	CCT4 CCTD SRB	CCT4
17.9838	18.0758	17.946	18.038	17.9712	18.0368	sp		489	622	17.967	18.0502	-0.0832558	O75439	MPPB_HUMAN	Mitochondrial-processing peptidase subunit beta (EC 3.4.24.64) (Beta-MPP) (P-52)	PMPCB MPPB	PMPCB
16.659	16.7328	16.5584	16.7702	16.7179	16.68	sp		189	1659	16.6451	16.7277	-0.0825825	Q9BWH2	FUND2_HUMAN	FUN14 domain-containing protein 2 (Cervical cancer proto-oncogene 3 protein) (HCC-3) (Hepatitis C virus core-binding protein 6)	FUNDC2 HCBP6 DC44 HCC3 PD03104	FUNDC2
18.7655	18.8762	18.8288	18.9053	18.7854	18.845	sp		151	1172	18.7932	18.8755	-0.0822735	P62263	RS14_HUMAN	40S ribosomal protein S14 (Small ribosomal subunit protein uS11)	RPS14 PRO2640	RPS14
16.7272	16.8504	16.8103	16.8661	16.8125	16.8763	tr		153	1942	16.7833	16.8642	-0.0809002	F8W727	F8W727_HUMAN	60S ribosomal protein L32	RPL32	RPL32
18.3882	18.5384	18.3959	18.464	18.3964	18.4188	sp		410	2334	18.3935	18.4737	-0.0802402	P13473	LAMP2_HUMAN	Lysosome-associated membrane glycoprotein 2 (LAMP-2) (Lysosome-associated membrane protein 2) (CD107 antigen-like family member B) (LGP-96) (CD antigen CD107b)	LAMP2	LAMP2
18.8012	18.8806	18.8065	18.8487	18.8228	18.9408	sp		336	709	18.8102	18.89	-0.0798626	P31937	3HIDH_HUMAN	3-hydroxyisobutyrate dehydrogenase, mitochondrial (HIBADH) (EC 1.1.1.31)	HIBADH	HIBADH
15.3035	15.2199	14.9394	15.0646	14.7485	14.9448	sp		719	1509	14.9971	15.0764	-0.0793009	P33993	MCM7_HUMAN	DNA replication licensing factor MCM7 (EC 3.6.4.12) (CDC47 homolog) (P1.1-MCM3)	MCM7 CDC47 MCM2	MCM7
19.3257	19.3264	19.3138	19.4475	19.3197	19.4224	sp		960	44	19.3197	19.3987	-0.0790367	O60313-2	OPA1_HUMAN	Dynamin-like 120 kDa protein, mitochondrial (EC 3.6.5.5) (Optic atrophy protein 1) [Cleaved into: Dynamin-like 120 kDa protein, form S1]	OPA1 KIAA0567	OPA1
15.8084	15.9041	15.7945	15.8891	15.6579	15.7043	sp		204	1935	15.7536	15.8325	-0.0788631	P84157	MXRA7_HUMAN	Matrix-remodeling-associated protein 7	MXRA7	MXRA7
19.3048	19.3242	19.2606	19.3784	19.2846	19.3832	sp		157	1708	19.2833	19.3619	-0.0786095	P83731	RL24_HUMAN	60S ribosomal protein L24 (60S ribosomal protein L30) (Large ribosomal subunit protein eL24)	RPL24	RPL24
18.6695	18.7177	18.6456	18.7692	18.7586	18.8217	tr		352	539	18.6912	18.7695	-0.0782928	B4DY09	B4DY09_HUMAN	Interleukin enhancer-binding factor 2 (cDNA FLJ51660, highly similar to Interleukin enhancer-binding factor 2)	ILF2	ILF2
17.3831	17.4734	17.5002	17.5581	17.4456	17.5309	sp		361	804	17.4429	17.5208	-0.0778484	Q8NBU5	ATAD1_HUMAN	ATPase family AAA domain-containing protein 1 (EC 3.6.1.3) (Thorase)	ATAD1 FNP001	ATAD1
19.3222	19.2501	18.7481	19.2059	19.4155	19.2632	sp		714	201	19.1619	19.2397	-0.0778084	P07384	CAN1_HUMAN	Calpain-1 catalytic subunit (EC 3.4.22.52) (Calcium-activated neutral proteinase 1) (CANP 1) (Calpain mu-type) (Calpain-1 large subunit) (Cell proliferation-inducing gene 30 protein) (Micromolar-calpain) (muCANP)	CAPN1 CANPL1 PIG30	CAPN1
15.1523	15.2189	15.2072	15.3204	15.1517	15.2029	sp		677	370	15.1704	15.2474	-0.0770073	P16435	NCPR_HUMAN	NADPH--cytochrome P450 reductase (CPR) (P450R) (EC 1.6.2.4)	POR CYPOR	POR
18.3017	18.3793	18.331	18.4418	18.4261	18.4681	sp		794	279	18.3529	18.4297	-0.0767956	O94874	UFL1_HUMAN	E3 UFM1-protein ligase 1 (EC 2.3.2.-) (E3 UFM1-protein transferase 1) (Multiple alpha-helix protein located at ER) (Novel LZAP-binding protein) (Regulator of C53/LZAP and DDRGK1)	UFL1 KIAA0776 MAXER NLBP RCAD	UFL1
18.9885	19.06	19.0006	19.1416	19.0411	19.0589	sp		711	282	19.0101	19.0868	-0.0767727	Q92945	FUBP2_HUMAN	Far upstream element-binding protein 2 (FUSE-binding protein 2) (KH type-splicing regulatory protein) (KSRP) (p75)	KHSRP FUBP2	KHSRP
17.2273	16.8244	17.126	17.2792	16.823	17.3029	sp		506	1820	17.0588	17.1355	-0.0767269	Q96JB5	CK5P3_HUMAN	CDK5 regulatory subunit-associated protein 3 (CDK5 activator-binding protein C53) (LXXLL/leucine-zipper-containing ARF-binding protein) (Protein HSF-27)	CDK5RAP3 IC53 LZAP MSTP016 OK/SW-cl.114 PP1553	CDK5RAP3
20.3056	20.4217	20.2771	20.3649	20.273	20.2987	sp		450	2481	20.2852	20.3618	-0.0765324	Q6PEY2	TBA3E_HUMAN	Tubulin alpha-3E chain (Alpha-tubulin 3E) [Cleaved into: Detyrosinated tubulin alpha-3E chain]	TUBA3E	TUBA3E
15.286	15.1887	15.3123	15.287	15.0669	15.4159	sp		1059	1189	15.2217	15.2972	-0.0754471	Q66K74	MAP1S_HUMAN	Microtubule-associated protein 1S (MAP-1S) (BPY2-interacting protein 1) (Microtubule-associated protein 8) (Variable charge Y chromosome 2-interacting protein 1) (VCY2-interacting protein 1) (VCY2IP-1) [Cleaved into: MAP1S heavy chain;MAP1S light chain]	MAP1S BPY2IP1 C19orf5 MAP8 VCY2IP1	MAP1S
18.7465	18.8395	18.786	18.8749	18.7753	18.8187	sp		356	720	18.7692	18.8444	-0.0751247	Q12907	LMAN2_HUMAN	Vesicular integral-membrane protein VIP36 (Glycoprotein GP36b) (Lectin mannose-binding 2) (Vesicular integral-membrane protein 36) (VIP36)	LMAN2 C5orf8	LMAN2
12.7023	11.9338	12.2418	12.8991	12.2191	12.5534	tr		1374	2161	12.3877	12.4621	-0.0743732	Q5JWT2	Q5JWT2_HUMAN	Mediator of RNA polymerase II transcription subunit 23	MED23	MED23
13.8906	14.232	14.648	14.3618	13.5765	13.7443	sp		699	1984	14.0384	14.1127	-0.074337	Q14978	NOLC1_HUMAN	Nucleolar and coiled-body phosphoprotein 1 (140 kDa nucleolar phosphoprotein) (Nopp140) (Hepatitis C virus NS5A-transactivated protein 13) (HCV NS5A-transactivated protein 13) (Nucleolar 130 kDa protein) (Nucleolar phosphoprotein p130)	NOLC1 KIAA0035 NS5ATP13	NOLC1
19.3373	19.1049	18.2742	18.7297	19.1394	19.1383	sp		1140	160	18.917	18.991	-0.0739918	Q16531	DDB1_HUMAN	DNA damage-binding protein 1 (DDB p127 subunit) (DNA damage-binding protein a) (DDBa) (Damage-specific DNA-binding protein 1) (HBV X-associated protein 1) (XAP-1) (UV-damaged DNA-binding factor) (UV-damaged DNA-binding protein 1) (UV-DDB 1) (XPE-binding factor) (XPE-BF) (Xeroderma pigmentosum group E-complementing protein) (XPCe)	DDB1 XAP1	DDB1
15.4705	15.5939	15.4121	15.5455	15.3081	15.273	sp		392	1004	15.3969	15.4708	-0.0738659	O15382	BCAT2_HUMAN	Branched-chain-amino-acid aminotransferase, mitochondrial (BCAT(m)) (EC 2.6.1.42) (Placental protein 18) (PP18)	BCAT2 BCATM BCT2 ECA40	BCAT2
13.5141	13.7709	13.729	13.2697	13.4002	13.8237	sp		399	2490	13.5478	13.6214	-0.0736523	Q86YH6	DLP1_HUMAN	Decaprenyl-diphosphate synthase subunit 2 (EC 2.5.1.91) (All-trans-decaprenyl-diphosphate synthase subunit 2) (Candidate tumor suppressor protein) (Decaprenyl pyrophosphate synthase subunit 2)	PDSS2 C6orf210 DLP1	PDSS2
16.1453	16.4244	16.2408	16.1103	16.3721	16.444	sp		1907	488	16.2527	16.3262	-0.0734806	Q5JRA6	TGO1_HUMAN	Transport and Golgi organization protein 1 homolog (TANGO1) (C219-reactive peptide) (D320) (Melanoma inhibitory activity protein 3)	MIA3 KIAA0268 TANGO UNQ6077/PRO20088	MIA3
20.5895	20.6669	20.5775	20.6675	20.6308	20.6831	sp		207	616	20.5993	20.6725	-0.0732555	P51149	RAB7A_HUMAN	Ras-related protein Rab-7a	RAB7A RAB7	RAB7A
14.6131	14.5303	14.5258	14.3351	14.1852	14.6779	sp		201	2166	14.4413	14.5144	-0.0730953	Q96FZ7	CHMP6_HUMAN	Charged multivesicular body protein 6 (Chromatin-modifying protein 6) (Vacuolar protein sorting-associated protein 20) (Vps20) (hVps20)	CHMP6 VPS20	CHMP6
18.0281	18.1841	18.1504	18.226	18.2621	18.2484	tr		177	1124	18.1469	18.2195	-0.0726395	H0YN26	H0YN26_HUMAN	Acidic leucine-rich nuclear phosphoprotein 32 family member A	ANP32A	ANP32A
17.8978	18.008	17.9431	18.0952	18.0282	17.9837	sp		718	296	17.9564	18.029	-0.072607	Q9BW92	SYTM_HUMAN	Threonine--tRNA ligase, mitochondrial (EC 6.1.1.3) (Threonyl-tRNA synthetase) (ThrRS) (Threonyl-tRNA synthetase-like 1)	TARS2 TARSL1	TARS2
15.9285	15.7746	15.6202	15.5637	15.2618	15.6895	sp		483	676	15.6035	15.6759	-0.0724049	Q6STE5	SMRD3_HUMAN	SWI/SNF-related matrix-associated actin-dependent regulator of chromatin subfamily D member 3 (60 kDa BRG-1/Brm-associated factor subunit C) (BRG1-associated factor 60C) (BAF60C)	SMARCD3 BAF60C	SMARCD3
18.573	18.6778	18.5269	18.6088	18.6209	18.6506	tr		190	1381	18.5736	18.6457	-0.0721455	J3QQ67	J3QQ67_HUMAN	60S ribosomal protein L18 (Fragment)	RPL18	RPL18
15.4992	15.5387	15.493	15.6186	15.4696	15.5178	sp		299	2078	15.4873	15.5584	-0.0711088	Q9NVA1	UQCC1_HUMAN	Ubiquinol-cytochrome-c reductase complex assembly factor 1 (Basic FGF-repressed Zic-binding protein) (bFGF-repressed Zic-binding protein) (bFZb) (Ubiquinol-cytochrome c reductase complex chaperone CBP3 homolog)	UQCC1 BZFB C20orf44 UQCC	UQCC1
16.3901	16.2419	16.4293	16.596	16.263	16.4559	sp		205	1036	16.3608	16.4313	-0.0704689	P62820	RAB1A_HUMAN	Ras-related protein Rab-1A (YPT1-related protein)	RAB1A RAB1	RAB1A
14.9537	15.0963	14.3415	14.9646	15.228	14.6736	sp		1711	595	14.8411	14.9115	-0.0704155	Q9Y5S2	MRCKB_HUMAN	Serine/threonine-protein kinase MRCK beta (EC 2.7.11.1) (CDC42-binding protein kinase beta) (CDC42BP-beta) (DMPK-like beta) (Myotonic dystrophy kinase-related CDC42-binding kinase beta) (MRCK beta) (Myotonic dystrophy protein kinase-like beta)	CDC42BPB KIAA1124	CDC42BPB
16.9009	16.9279	16.8605	16.9311	16.8265	16.9353	sp		525	617	16.8626	16.9314	-0.0687885	Q10713	MPPA_HUMAN	Mitochondrial-processing peptidase subunit alpha (Alpha-MPP) (P-55)	PMPCA INPP5E KIAA0123 MPPA	PMPCA
13.5997	12.9232	13.4651	14.9644	13.401	12.7835	sp		415	2639	13.4886	13.557	-0.0684423	P78368	KC1G2_HUMAN	Casein kinase I isoform gamma-2 (CKI-gamma 2) (EC 2.7.11.1)	CSNK1G2 CK1G2	CSNK1G2
15.3127	15.8565	15.7462	15.4956	15.795	15.7054	sp		794	1229	15.618	15.6858	-0.0678492	Q9UBV2	SE1L1_HUMAN	Protein sel-1 homolog 1 (Suppressor of lin-12-like protein 1) (Sel-1L)	SEL1L TSA305 UNQ128/PRO1063	SEL1L
17.0479	16.7644	16.0178	16.8391	17.056	16.7216	sp		1102	1003	16.7073	16.775	-0.0677681	Q93009	UBP7_HUMAN	Ubiquitin carboxyl-terminal hydrolase 7 (EC 3.4.19.12) (Deubiquitinating enzyme 7) (Herpesvirus-associated ubiquitin-specific protease) (Ubiquitin thioesterase 7) (Ubiquitin-specific-processing protease 7)	USP7 HAUSP	USP7
19.4791	19.5366	19.4766	19.552	19.4677	19.5379	sp		736	165	19.4745	19.5422	-0.0677013	P51659	DHB4_HUMAN	Peroxisomal multifunctional enzyme type 2 (MFE-2) (17-beta-hydroxysteroid dehydrogenase 4) (17-beta-HSD 4) (D-bifunctional protein) (DBP) (Multifunctional protein 2) (MPF-2) (Short chain dehydrogenase/reductase family 8C member 1) [Cleaved into: (3R)-hydroxyacyl-CoA dehydrogenase (EC 1.1.1.n12);Enoyl-CoA hydratase 2 (EC 4.2.1.107) (EC 4.2.1.119) (3-alpha,7-alpha,12-alpha-trihydroxy-5-beta-cholest…	HSD17B4 EDH17B4 SDR8C1	HSD17B4
16.4291	16.492	16.6694	16.6519	16.3262	16.4807	sp		800	659	16.4749	16.5415	-0.0666103	O43290	SNUT1_HUMAN	U4/U6.U5 tri-snRNP-associated protein 1 (SNU66 homolog) (hSnu66) (Squamous cell carcinoma antigen recognized by T-cells 1) (SART-1) (hSART-1) (U4/U6.U5 tri-snRNP-associated 110 kDa protein) (allergen Hom s 1)	SART1	SART1
17.9006	17.9638	17.7525	17.9973	17.9609	17.852	sp		727	373	17.8713	17.9377	-0.0663605	P43304	GPDM_HUMAN	Glycerol-3-phosphate dehydrogenase, mitochondrial (GPD-M) (GPDH-M) (EC 1.1.5.3) (mtGPD)	GPD2	GPD2
19.5307	19.578	19.4251	19.5127	19.5499	19.6129	sp		4646	3	19.5019	19.5678	-0.0659084	Q14204	DYHC1_HUMAN	Cytoplasmic dynein 1 heavy chain 1 (Cytoplasmic dynein heavy chain 1) (Dynein heavy chain, cytosolic)	DYNC1H1 DHC1 DNCH1 DNCL DNECL DYHC KIAA0325	DYNC1H1
12.8478	12.5719	11.6664	12.3779	12.5548	12.3166	tr		2875	1361	12.3563	12.4221	-0.0658283	E9PBC6	E9PBC6_HUMAN	Transforming acidic coiled-coil-containing protein 2	TACC2	TACC2
20.2703	20.342	20.2912	20.3356	20.2562	20.3368	sp		293	683	20.2725	20.3381	-0.0656052	P15880	RS2_HUMAN	40S ribosomal protein S2 (40S ribosomal protein S4) (Protein LLRep3) (Small ribosomal subunit protein uS5)	RPS2 RPS4	RPS2
17.7965	17.9442	17.6565	17.5321	17.5006	17.6741	sp		288	1017	17.6512	17.7168	-0.0655785	P27105	STOM_HUMAN	Erythrocyte band 7 integral membrane protein (Protein 7.2b) (Stomatin)	STOM BND7 EPB72	STOM
16.8318	16.9215	16.8434	17.054	17.0473	16.9429	sp		1168	999	16.9075	16.9728	-0.0653019	O43306	ADCY6_HUMAN	Adenylate cyclase type 6 (EC 4.6.1.1) (ATP pyrophosphate-lyase 6) (Adenylate cyclase type VI) (Adenylyl cyclase 6) (Ca(2+)-inhibitable adenylyl cyclase)	ADCY6 KIAA0422	ADCY6
12.2332	13.887	13.0136	13.29	12.8378	11.1002	sp		425	2381	12.6948	12.7591	-0.064249	O95810	CAVN2_HUMAN	Caveolae-associated protein 2 (Cavin-2) (PS-p68) (Phosphatidylserine-binding protein) (Serum deprivation-response protein)	CAVIN2 SDPR	CAVIN2
17.7134	17.7041	17.7492	17.8868	17.5879	17.6515	tr		625	1735	17.6835	17.7475	-0.0639973	A0A0C4DFM1	A0A0C4DFM1_HUMAN	Transmembrane 9 superfamily member	TM9SF4 hCG_38809	TM9SF4
19.4757	19.4777	19.4541	19.4569	19.4575	19.6438	sp		837	360	19.4624	19.5261	-0.0637054	Q13724	MOGS_HUMAN	Mannosyl-oligosaccharide glucosidase (EC 3.2.1.106) (Processing A-glucosidase I)	MOGS GCS1	MOGS
17.7423	17.7738	17.7629	17.7714	17.7255	17.8765	sp		261	1331	17.7436	17.8073	-0.0636711	P30040	ERP29_HUMAN	Endoplasmic reticulum resident protein 29 (ERp29) (Endoplasmic reticulum resident protein 28) (ERp28) (Endoplasmic reticulum resident protein 31) (ERp31)	ERP29 C12orf8 ERP28	ERP29
14.0115	13.8854	14.1536	14.089	13.851	14.232	sp		1087	92	14.0054	14.0688	-0.0634413	Q9Y2J2-2	E41L3_HUMAN	Band 4.1-like protein 3 (4.1B) (Differentially expressed in adenocarcinoma of the lung protein 1) (DAL-1) [Cleaved into: Band 4.1-like protein 3, N-terminally processed]	EPB41L3 DAL1 KIAA0987	EPB41L3
19.3103	19.4242	19.3852	19.3868	19.3358	19.4093	sp		509	390	19.3438	19.4068	-0.0629711	P09622	DLDH_HUMAN	Dihydrolipoyl dehydrogenase, mitochondrial (EC 1.8.1.4) (Dihydrolipoamide dehydrogenase) (Glycine cleavage system L protein)	DLD GCSL LAD PHE3	DLD
19.1157	19.1714	19.0522	19.1787	19.1862	19.1929	sp		148	1849	19.118	19.181	-0.0629559	P46776	RL27A_HUMAN	60S ribosomal protein L27a (Large ribosomal subunit protein uL15)	RPL27A	RPL27A
18.4434	18.5066	18.4054	18.5752	18.4906	18.4449	sp		156	918	18.4465	18.5089	-0.0624161	P62750	RL23A_HUMAN	60S ribosomal protein L23a (Large ribosomal subunit protein uL23)	RPL23A	RPL23A
12.0508	11.8973	13.262	11.3687	9.89984	12.1319	tr		138	2542	11.7375	11.7993	-0.0617599	H0YLT4	H0YLT4_HUMAN	Pre-B-cell leukemia transcription factor 1 (Fragment)	PBX1	PBX1
17.5716	17.5472	17.5193	17.5831	17.4989	17.6446	sp		261	1881	17.5299	17.5916	-0.0617237	Q9P0I2	EMC3_HUMAN	ER membrane protein complex subunit 3 (Transmembrane protein 111)	EMC3 TMEM111	EMC3
18.0104	18.1621	18.2682	18.2548	18.2353	18.2817	sp		271	998	18.1713	18.2329	-0.0615749	Q9Y5M8	SRPRB_HUMAN	Signal recognition particle receptor subunit beta (SR-beta) (Protein APMCF1)	SRPRB PSEC0230	SRPRB
15.5003	15.7077	15.7529	15.6832	15.6008	15.6477	sp		777	1458	15.618	15.6795	-0.0615358	O14964	HGS_HUMAN	Hepatocyte growth factor-regulated tyrosine kinase substrate (Hrs) (Protein pp110)	HGS HRS	HGS
13.1096	12.71	12.8954	13.4122	12.6902	12.7568	tr		1962	2427	12.8984	12.9597	-0.0612507	K4DIA1	K4DIA1_HUMAN	Sodium channel protein	SCN5A	SCN5A
20.062	20.078	20.0215	20.1216	20.0465	20.1127	sp		224	465	20.0433	20.1041	-0.0607986	P30041	PRDX6_HUMAN	Peroxiredoxin-6 (EC 1.11.1.15) (1-Cys peroxiredoxin) (1-Cys PRX) (24 kDa protein) (Acidic calcium-independent phospholipase A2) (aiPLA2) (EC 3.1.1.4) (Antioxidant protein 2) (Liver 2D page spot 40) (Non-selenium glutathione peroxidase) (NSGPx) (Red blood cells page spot 12)	PRDX6 AOP2 KIAA0106	PRDX6
18.6104	18.5479	18.4042	18.5623	18.4833	18.5696	sp		2115	24	18.4993	18.5599	-0.0606709	Q14980-2	NUMA1_HUMAN	Nuclear mitotic apparatus protein 1 (Nuclear matrix protein-22) (NMP-22) (Nuclear mitotic apparatus protein) (NuMA protein) (SP-H antigen)	NUMA1 NMP22 NUMA	NUMA1
19.578	19.6674	19.6004	19.6849	19.6981	19.7059	sp		707	262	19.6255	19.6861	-0.0605583	P23246	SFPQ_HUMAN	Splicing factor, proline- and glutamine-rich (100 kDa DNA-pairing protein) (hPOMp100) (DNA-binding p52/p100 complex, 100 kDa subunit) (Polypyrimidine tract-binding protein-associated-splicing factor) (PSF) (PTB-associated-splicing factor)	SFPQ PSF	SFPQ
16.5245	16.5875	16.511	16.5712	16.2045	16.2621	sp		293	1677	16.4134	16.4736	-0.0601959	Q9NRG7-2	D39U1_HUMAN	Epimerase family protein SDR39U1 (EC 1.1.1.-) (Short-chain dehydrogenase/reductase family 39U member 1)	SDR39U1 C14orf124 HCDI	SDR39U1
22.7132	22.8175	22.732	22.8308	22.7768	22.7539	sp		977	161	22.7406	22.8007	-0.0600815	O95782	AP2A1_HUMAN	AP-2 complex subunit alpha-1 (100 kDa coated vesicle protein A) (Adaptor protein complex AP-2 subunit alpha-1) (Adaptor-related protein complex 2 subunit alpha-1) (Alpha-adaptin A) (Alpha1-adaptin) (Clathrin assembly protein complex 2 alpha-A large chain) (Plasma membrane adaptor HA2/AP2 adaptin alpha A subunit)	AP2A1 ADTAA CLAPA1	AP2A1
14.6451	14.7221	14.435	14.5843	14.5525	14.5065	sp		147	2480	14.5442	14.6043	-0.0600691	Q9Y2V2	CHSP1_HUMAN	Calcium-regulated heat-stable protein 1 (Calcium-regulated heat-stable protein of 24 kDa) (CRHSP-24)	CARHSP1	CARHSP1
14.64	14.7867	14.8109	14.827	14.9034	14.9205	sp		511	1034	14.7848	14.8447	-0.0599537	P21281	VATB2_HUMAN	V-type proton ATPase subunit B, brain isoform (V-ATPase subunit B 2) (Endomembrane proton pump 58 kDa subunit) (HO57) (Vacuolar proton pump subunit B 2)	ATP6V1B2 ATP6B2 VPP3	ATP6V1B2
14.8924	15.3686	14.6045	13.8746	14.7443	15.1765	sp		313	1927	14.7471	14.8066	-0.0595026	Q9Y6I9	TX264_HUMAN	Testis-expressed protein 264 (Putative secreted protein Zsig11)	TEX264 ZSIG11 UNQ337/PRO536	TEX264
17.0949	17.0653	17.0197	17.1332	17.0463	17.1407	sp		466	1163	17.0536	17.1131	-0.0594501	Q13505	MTX1_HUMAN	Metaxin-1 (Mitochondrial outer membrane import complex protein 1)	MTX1 MTX MTXN	MTX1
17.6575	17.7365	17.6983	17.7364	17.6621	17.7233	sp		332	1145	17.6726	17.7321	-0.0594215	P29966	MARCS_HUMAN	Myristoylated alanine-rich C-kinase substrate (MARCKS) (Protein kinase C substrate, 80 kDa protein, light chain) (80K-L protein) (PKCSL)	MARCKS MACS PRKCSL	MARCKS
16.1283	16.3301	16.2177	15.975	16.0033	16.2224	sp		568	751	16.1164	16.1758	-0.0593815	O95470	SGPL1_HUMAN	Sphingosine-1-phosphate lyase 1 (S1PL) (SP-lyase 1) (SPL 1) (hSPL) (EC 4.1.2.27) (Sphingosine-1-phosphate aldolase)	SGPL1 KIAA1252	SGPL1
16.5108	16.2511	15.8929	16.2851	16.5448	16.5903	tr		397	1977	16.3162	16.3755	-0.0593109	H0Y5K5	H0Y5K5_HUMAN	Endoplasmic reticulum-Golgi intermediate compartment protein 3 (Fragment)	ERGIC3	ERGIC3
16.4662	16.3237	16.2026	16.2858	15.6055	15.8424	tr		1220	665	16.0914	16.1506	-0.0592232	A0A087WUT6	A0A087WUT6_HUMAN	Eukaryotic translation initiation factor 5B	EIF5B	EIF5B
17.1936	17.2287	16.9867	17.1142	17.2312	17.2459	sp		314	1344	17.1372	17.1963	-0.0591068	Q96GK7	FAH2A_HUMAN	Fumarylacetoacetate hydrolase domain-containing protein 2A (EC 3.-.-.-)	FAHD2A CGI-105	FAHD2A
17.2557	17.3027	17.0038	17.0821	17.065	17.1168	sp		118	2009	17.1082	17.1672	-0.0590553	P30046	DOPD_HUMAN	D-dopachrome decarboxylase (EC 4.1.1.84) (D-dopachrome tautomerase) (Phenylpyruvate tautomerase II)	DDT	DDT
14.1575	14.118	14.0884	14.0082	13.9573	14.2536	sp		390	2556	14.0677	14.1266	-0.0588417	Q96E39	RMXL1_HUMAN	RNA binding motif protein, X-linked-like-1 (Heterogeneous nuclear ribonucleoprotein G-like 1)	RBMXL1	RBMXL1
19.0542	19.0757	18.9506	19.1059	19.0085	19.0078	sp		204	935	19.0044	19.0631	-0.058712	P61313	RL15_HUMAN	60S ribosomal protein L15 (Large ribosomal subunit protein eL15)	RPL15 EC45 TCBAP0781	RPL15
16.6142	16.5587	16.5089	16.571	16.4967	16.6653	sp		308	1234	16.5399	16.5983	-0.058382	O14579	COPE_HUMAN	Coatomer subunit epsilon (Epsilon-coat protein) (Epsilon-COP)	COPE	COPE
18.3331	18.416	18.3329	18.3756	18.3881	18.4344	sp		140	1859	18.3514	18.4087	-0.0572739	P62829	RL23_HUMAN	60S ribosomal protein L23 (60S ribosomal protein L17) (Large ribosomal subunit protein uL14)	RPL23	RPL23
20.1471	20.2209	20.1387	20.2124	20.1703	20.1929	sp		298	745	20.152	20.2088	-0.0567093	P36542	ATPG_HUMAN	ATP synthase subunit gamma, mitochondrial (ATP synthase F1 subunit gamma) (F-ATPase gamma subunit)	ATP5F1C ATP5C ATP5C1 ATP5CL1	ATP5F1C
17.6564	17.6393	17.568	17.6726	17.5426	17.6245	sp		563	435	17.589	17.6455	-0.0564461	Q9HCC0	MCCB_HUMAN	Methylcrotonoyl-CoA carboxylase beta chain, mitochondrial (MCCase subunit beta) (EC 6.4.1.4) (3-methylcrotonyl-CoA carboxylase 2) (3-methylcrotonyl-CoA carboxylase non-biotin-containing subunit) (3-methylcrotonyl-CoA:carbon dioxide ligase subunit beta)	MCCC2 MCCB	MCCC2
16.8435	16.9419	16.9143	16.9416	16.8724	16.9158	sp		454	722	16.8767	16.9331	-0.0563507	Q96JJ7	TMX3_HUMAN	Protein disulfide-isomerase TMX3 (EC 5.3.4.1) (Thioredoxin domain-containing protein 10) (Thioredoxin-related transmembrane protein 3)	TMX3 KIAA1830 TXNDC10	TMX3
15.2398	15.9324	15.7286	15.5838	16.0205	15.6374	sp		271	1932	15.663	15.7179	-0.054925	Q8IY95	TM192_HUMAN	Transmembrane protein 192	TMEM192	TMEM192
20.0309	19.9851	19.8637	20.013	19.9176	19.9788	sp		675	462	19.9374	19.9923	-0.0549068	Q9UJS0	CMC2_HUMAN	Calcium-binding mitochondrial carrier protein Aralar2 (Citrin) (Mitochondrial aspartate glutamate carrier 2) (Solute carrier family 25 member 13)	SLC25A13 ARALAR2	SLC25A13
16.5599	16.3501	15.9909	16.678	17.1283	16.8155	sp		941	1542	16.5597	16.6145	-0.0548401	Q9NZ08	ERAP1_HUMAN	Endoplasmic reticulum aminopeptidase 1 (EC 3.4.11.-) (ARTS-1) (Adipocyte-derived leucine aminopeptidase) (A-LAP) (Aminopeptidase PILS) (Puromycin-insensitive leucyl-specific aminopeptidase) (PILS-AP) (Type 1 tumor necrosis factor receptor shedding aminopeptidase regulator)	ERAP1 APPILS ARTS1 KIAA0525 UNQ584/PRO1154	ERAP1
14.0563	13.3684	13.7462	13.7028	12.652	13.5463	sp		289	2045	13.4848	13.5392	-0.0543146	Q8TC26	TM163_HUMAN	Transmembrane protein 163	TMEM163	TMEM163
16.8548	16.882	16.8238	16.8199	17.1332	17.2727	sp		535	1387	16.9372	16.9915	-0.054285	P51649-2	SSDH_HUMAN	Succinate-semialdehyde dehydrogenase, mitochondrial (EC 1.2.1.24) (Aldehyde dehydrogenase family 5 member A1) (NAD(+)-dependent succinic semialdehyde dehydrogenase)	ALDH5A1 SSADH	ALDH5A1
17.9162	17.9207	17.8187	17.9785	17.8736	17.8718	sp		725	531	17.8695	17.9237	-0.0541821	Q96RQ3	MCCA_HUMAN	Methylcrotonoyl-CoA carboxylase subunit alpha, mitochondrial (MCCase subunit alpha) (EC 6.4.1.4) (3-methylcrotonyl-CoA carboxylase 1) (3-methylcrotonyl-CoA carboxylase biotin-containing subunit) (3-methylcrotonyl-CoA:carbon dioxide ligase subunit alpha)	MCCC1 MCCA	MCCC1
15.192	15.5292	15.5744	15.1871	15.4351	15.6458	sp		1102	1102	15.4005	15.454	-0.0535698	Q9H2P0	ADNP_HUMAN	Activity-dependent neuroprotector homeobox protein (Activity-dependent neuroprotective protein)	ADNP ADNP1 KIAA0784	ADNP
15.1014	14.9109	14.9369	14.939	14.9841	15.3325	sp		1443	1000	15.0075	15.0608	-0.0532923	Q10570	CPSF1_HUMAN	Cleavage and polyadenylation specificity factor subunit 1 (Cleavage and polyadenylation specificity factor 160 kDa subunit) (CPSF 160 kDa subunit)	CPSF1 CPSF160	CPSF1
16.768	16.8613	16.8235	16.945	16.5938	16.5374	sp		445	1058	16.7284	16.7813	-0.0528202	Q96CS3	FAF2_HUMAN	FAS-associated factor 2 (Protein ETEA) (UBX domain-containing protein 3B) (UBX domain-containing protein 8)	FAF2 ETEA KIAA0887 UBXD8 UBXN3B	FAF2
18.8534	18.8812	18.7827	18.844	18.8708	18.939	sp		644	431	18.8356	18.8881	-0.0524368	Q96AE4-2	FUBP1_HUMAN	Far upstream element-binding protein 1 (FBP) (FUSE-binding protein 1) (DNA helicase V) (hDH V)	FUBP1	FUBP1
16.0577	16.1656	16.0317	16.3076	16.2384	16.0115	sp		386	970	16.1093	16.1616	-0.0523281	P53582	MAP11_HUMAN	Methionine aminopeptidase 1 (MAP 1) (MetAP 1) (EC 3.4.11.18) (Peptidase M 1)	METAP1 KIAA0094	METAP1
14.1371	14.8049	15.4584	14.3415	14.4088	15.0116	sp		248	2043	14.6681	14.7194	-0.0512571	Q9Y3Y2	CHTOP_HUMAN	Chromatin target of PRMT1 protein (Friend of PRMT1 protein) (Small arginine- and glycine-rich protein) (SRAG)	CHTOP C1orf77 FOP HT031 PP7704	CHTOP
15.0175	15.0819	15.0676	15.1311	15.1456	15.1692	sp		524	2704	15.0769	15.1274	-0.050499	Q96E52	OMA1_HUMAN	Metalloendopeptidase OMA1, mitochondrial (EC 3.4.24.-) (Metalloprotease-related protein 1) (MPRP-1) (Overlapping with the m-AAA protease 1 homolog)	OMA1 MPRP1	OMA1
17.2053	17.256	17.0378	17.451	17.2659	16.9536	sp		949	1179	17.1697	17.2202	-0.0504971	Q10567-3	AP1B1_HUMAN	AP-1 complex subunit beta-1 (Adaptor protein complex AP-1 subunit beta-1) (Adaptor-related protein complex 1 subunit beta-1) (Beta-1-adaptin) (Beta-adaptin 1) (Clathrin assembly protein complex 1 beta large chain) (Golgi adaptor HA1/AP1 adaptin beta subunit)	AP1B1 ADTB1 BAM22 CLAPB2	AP1B1
17.8117	17.8895	17.7944	17.8407	17.8523	17.8787	sp		473	1774	17.8195	17.8696	-0.0501842	P48651	PTSS1_HUMAN	Phosphatidylserine synthase 1 (PSS-1) (PtdSer synthase 1) (EC 2.7.8.29) (Serine-exchange enzyme I)	PTDSS1 KIAA0024 PSSA	PTDSS1
21.6834	21.7253	21.6749	21.7325	21.6948	21.745	sp		763	83	21.6844	21.7343	-0.0498981	P40939	ECHA_HUMAN	Trifunctional enzyme subunit alpha, mitochondrial (78 kDa gastrin-binding protein) (Monolysocardiolipin acyltransferase) (EC 2.3.1.-) (TP-alpha) [Includes: Long-chain enoyl-CoA hydratase (EC 4.2.1.17);Long chain 3-hydroxyacyl-CoA dehydrogenase (EC 1.1.1.211)]	HADHA HADH	HADHA
15.3793	15.4462	15.2669	15.3628	15.3615	15.3479	sp		192	2638	15.3359	15.3856	-0.0497684	Q96KR6	F210B_HUMAN	Protein FAM210B, mitochondrial	FAM210B C20orf108 PSEC0265	FAM210B
16.5009	16.4916	16.4623	16.6304	16.5707	16.5582	sp		449	1295	16.5113	16.5601	-0.0487633	P55795	HNRH2_HUMAN	Heterogeneous nuclear ribonucleoprotein H2 (hnRNP H2) (FTP-3) (Heterogeneous nuclear ribonucleoprotein H') (hnRNP H') [Cleaved into: Heterogeneous nuclear ribonucleoprotein H2, N-terminally processed]	HNRNPH2 FTP3 HNRPH2	HNRNPH2
16.453	16.5204	16.4713	16.5128	16.3767	16.4134	sp		490	1719	16.4336	16.4822	-0.048542	Q8IV08	PLD3_HUMAN	Phospholipase D3 (PLD 3) (EC 3.1.4.4) (Choline phosphatase 3) (HindIII K4L homolog) (Hu-K4) (Phosphatidylcholine-hydrolyzing phospholipase D3)	PLD3	PLD3
18.6053	18.5997	18.505	18.6199	18.5961	18.6318	sp		156	843	18.5688	18.6171	-0.0483303	P62979	RS27A_HUMAN	Ubiquitin-40S ribosomal protein S27a (Ubiquitin carboxyl extension protein 80) [Cleaved into: Ubiquitin;40S ribosomal protein S27a (Small ribosomal subunit protein eS31)]	RPS27A UBA80 UBCEP1	RPS27A
17.214	17.116	18.11	17.9584	17.5546	17.947	sp		226	1300	17.6262	17.6738	-0.0475903	Q9Y2Q3-2	GSTK1_HUMAN	Glutathione S-transferase kappa 1 (EC 2.5.1.18) (GST 13-13) (GST class-kappa) (GSTK1-1) (hGSTK1) (Glutathione S-transferase subunit 13)	GSTK1 HDCMD47P	GSTK1
14.3394	14.3163	14.3136	14.4761	14.6321	14.6344	sp		334	2683	14.4284	14.4756	-0.0472393	Q9NZL9	MAT2B_HUMAN	Methionine adenosyltransferase 2 subunit beta (Methionine adenosyltransferase II beta) (MAT II beta) (Putative dTDP-4-keto-6-deoxy-D-glucose 4-reductase)	MAT2B TGR MSTP045 Nbla02999 UNQ2435/PRO4995	MAT2B
17.0314	17.0727	17.0313	17.0725	17.0692	17.1266	tr		406	1413	17.044	17.0906	-0.046627	K7EQ55	K7EQ55_HUMAN	DAZ-associated protein 1	DAZAP1	DAZAP1
16.166	15.9687	16.061	16.1642	15.8326	16.0656	tr		88	2413	16.0199	16.0662	-0.0462856	H3BSM5	H3BSM5_HUMAN	Gamma-aminobutyric acid receptor-associated protein-like 2	GABARAPL2	GABARAPL2
18.3529	18.3479	18.3613	18.4566	18.3439	18.3907	tr		270	1854	18.3527	18.3984	-0.045702	J3QL56	J3QL56_HUMAN	Protein SCO1 homolog, mitochondrial	SCO1	SCO1
16.9056	17.4155	16.7934	16.7509	17.0794	16.7481	tr		166	2058	16.9261	16.9715	-0.0453815	A0A087X1K9	A0A087X1K9_HUMAN	Acyl-protein thioesterase 1	LYPLA1	LYPLA1
16.046	15.4322	16.0408	16.1658	15.7495	16.3743	sp		423	1385	15.9454	15.9908	-0.0453634	Q9BXS5	AP1M1_HUMAN	AP-1 complex subunit mu-1 (AP-mu chain family member mu1A) (Adaptor protein complex AP-1 subunit mu-1) (Adaptor-related protein complex 1 subunit mu-1) (Clathrin assembly protein complex 1 mu-1 medium chain 1) (Clathrin coat assembly protein AP47) (Clathrin coat-associated protein AP47) (Golgi adaptor HA1/AP1 adaptin mu-1 subunit) (Mu-adaptin 1) (Mu1A-adaptin)	AP1M1 CLTNM	AP1M1
15.3244	15.3084	15.3703	15.4554	15.3612	15.4257	tr		232	1758	15.352	15.3965	-0.0445156	J3KQY1	J3KQY1_HUMAN	39S ribosomal protein L22, mitochondrial	MRPL22	MRPL22
15.568	15.8136	15.7507	15.7585	15.7842	15.6641	sp		360	1796	15.701	15.7454	-0.0444098	Q96EE3-1	SEH1_HUMAN	Nucleoporin SEH1 (GATOR complex protein SEH1) (Nup107-160 subcomplex subunit SEH1) (SEC13-like protein)	SEH1L SEC13L SEH1	SEH1L
15.9388	16.0068	16.0087	16.1249	15.9437	15.8905	sp		300	911	15.9637	16.0074	-0.0436821	O15144	ARPC2_HUMAN	Actin-related protein 2/3 complex subunit 2 (Arp2/3 complex 34 kDa subunit) (p34-ARC)	ARPC2 ARC34 PRO2446	ARPC2
17.6448	17.6406	17.4926	17.5237	17.5723	17.6763	sp		615	1394	17.5699	17.6136	-0.0436554	Q14739	LBR_HUMAN	Delta(14)-sterol reductase LBR (Delta-14-SR) (EC 1.3.1.70) (3-beta-hydroxysterol Delta (14)-reductase) (C-14 sterol reductase) (C14SR) (Integral nuclear envelope inner membrane protein) (LMN2R) (Lamin-B receptor) (Sterol C14-reductase)	LBR	LBR
19.1884	19.203	19.152	19.2492	19.2012	19.2192	sp		732	101	19.1805	19.2238	-0.0432777	P13010	XRCC5_HUMAN	X-ray repair cross-complementing protein 5 (EC 3.6.4.-) (86 kDa subunit of Ku antigen) (ATP-dependent DNA helicase 2 subunit 2) (ATP-dependent DNA helicase II 80 kDa subunit) (CTC box-binding factor 85 kDa subunit) (CTC85) (CTCBF) (DNA repair protein XRCC5) (Ku80) (Ku86) (Lupus Ku autoantigen protein p86) (Nuclear factor IV) (Thyroid-lupus autoantigen) (TLAA) (X-ray repair complementing defective…	XRCC5 G22P2	XRCC5
19.7722	19.8791	19.8291	19.8687	19.8235	19.8056	sp		730	140	19.8083	19.8511	-0.0428677	P52272-2	HNRPM_HUMAN	Heterogeneous nuclear ribonucleoprotein M (hnRNP M)	HNRNPM HNRPM NAGR1	HNRNPM
17.7784	17.7784	17.4517	17.5003	17.7483	17.8283	tr		223	1088	17.6595	17.7023	-0.0428543	J3KS22	J3KS22_HUMAN	L-xylulose reductase (Fragment)	DCXR	DCXR
18.3728	18.2652	18.4055	18.4745	18.268	18.434	sp		780	416	18.3487	18.3912	-0.0424995	P17858	PFKAL_HUMAN	ATP-dependent 6-phosphofructokinase, liver type (ATP-PFK) (PFK-L) (EC 2.7.1.11) (6-phosphofructokinase type B) (Phosphofructo-1-kinase isozyme B) (PFK-B) (Phosphohexokinase)	PFKL	PFKL
14.8648	14.9506	14.8705	14.9001	14.8604	14.8713	sp		977	763	14.8652	14.9073	-0.0421352	Q96T37	RBM15_HUMAN	RNA-binding protein 15 (One-twenty two protein 1) (RNA-binding motif protein 15)	RBM15 OTT OTT1	RBM15
19.5171	19.513	19.4926	19.5022	19.4902	19.6098	sp		556	169	19.5	19.5417	-0.0417023	P17987	TCPA_HUMAN	T-complex protein 1 subunit alpha (TCP-1-alpha) (CCT-alpha)	TCP1 CCT1 CCTA	TCP1
14.0348	13.7985	13.8979	14.2071	14.0888	14.1402	tr		512	2678	14.0072	14.0486	-0.0414085	J3QSH4	J3QSH4_HUMAN	Vascular endothelial zinc finger 1	VEZF1	VEZF1
15.1673	15.0196	14.9761	15.0233	14.9648	15.1891	sp		524	1787	15.036	15.0773	-0.0413055	Q13177	PAK2_HUMAN	Serine/threonine-protein kinase PAK 2 (EC 2.7.11.1) (Gamma-PAK) (PAK65) (S6/H4 kinase) (p21-activated kinase 2) (PAK-2) (p58) [Cleaved into: PAK-2p27 (p27);PAK-2p34 (p34) (C-t-PAK2)]	PAK2	PAK2
15.2979	15.5949	15.6369	14.8565	14.8939	15.5009	sp		500	2123	15.2762	15.3175	-0.0412445	O94919	ENDD1_HUMAN	Endonuclease domain-containing 1 protein (EC 3.1.30.-)	ENDOD1 KIAA0830	ENDOD1
17.4948	17.4097	17.5632	17.6998	17.5747	17.6462	sp		503	765	17.5442	17.5852	-0.0409737	Q8NC56	LEMD2_HUMAN	LEM domain-containing protein 2 (hLEM2)	LEMD2	LEMD2
19.1188	19.0942	19.0612	19.0933	19.0324	19.1478	sp		636	331	19.0708	19.1118	-0.0409698	P11940	PABP1_HUMAN	Polyadenylate-binding protein 1 (PABP-1) (Poly(A)-binding protein 1)	PABPC1 PAB1 PABP1 PABPC2	PABPC1
14.8173	14.4742	14.7568	14.6387	14.0961	14.6801	sp		268	2105	14.5567	14.5977	-0.0409365	Q9BTT0	AN32E_HUMAN	Acidic leucine-rich nuclear phosphoprotein 32 family member E (LANP-like protein) (LANP-L)	ANP32E	ANP32E
24.2481	24.2848	24.2364	24.2959	24.2328	24.2585	sp		553	61	24.2391	24.2797	-0.0406113	P25705	ATPA_HUMAN	ATP synthase subunit alpha, mitochondrial (ATP synthase F1 subunit alpha)	ATP5F1A ATP5A ATP5A1 ATP5AL2 ATPM	ATP5F1A
18.3949	18.354	18.2604	18.2845	18.4233	18.5605	sp		608	474	18.3596	18.3997	-0.0400963	O94826	TOM70_HUMAN	Mitochondrial import receptor subunit TOM70 (Mitochondrial precursor proteins import receptor) (Translocase of outer membrane 70 kDa subunit) (Translocase of outer mitochondrial membrane protein 70)	TOMM70 KIAA0719 TOM70 TOMM70A	TOMM70
16.4134	16.4889	16.4759	16.5051	16.5081	16.5236	tr		225	1887	16.4658	16.5058	-0.0400219	I3L0E3	I3L0E3_HUMAN	HCG1984214, isoform CRA_a	hCG_1984214	hCG_1984214
21.3162	21.3286	21.3112	21.345	21.2937	21.3665	sp		417	297	21.307	21.3467	-0.0396366	P27797	CALR_HUMAN	Calreticulin (CRP55) (Calregulin) (Endoplasmic reticulum resident protein 60) (ERp60) (HACBP) (grp60)	CALR CRTC	CALR
20.0167	20.083	20.0133	20.0211	20.0057	20.0502	sp		266	536	20.0119	20.0514	-0.0395336	P62424	RL7A_HUMAN	60S ribosomal protein L7a (Large ribosomal subunit protein eL8) (PLA-X polypeptide) (Surfeit locus protein 3)	RPL7A SURF-3 SURF3	RPL7A
14.4834	14.4885	14.516	14.538	14.1556	14.2459	sp		176	2093	14.385	14.4241	-0.0391111	Q9BRG1	VPS25_HUMAN	Vacuolar protein-sorting-associated protein 25 (hVps25) (Dermal papilla-derived protein 9) (ELL-associated protein of 20 kDa) (ESCRT-II complex subunit VPS25)	VPS25 DERP9 EAP20	VPS25
16.3391	16.1053	16.2966	16.6001	16.4402	16.4871	sp		318	1475	16.3586	16.3975	-0.0388355	O75208	COQ9_HUMAN	Ubiquinone biosynthesis protein COQ9, mitochondrial	COQ9 C16orf49 HSPC326 PSEC0129	COQ9
17.0621	17.1327	17.1078	17.1773	17.1247	17.0997	tr		979	497	17.0982	17.1366	-0.0383377	B7ZM99	B7ZM99_HUMAN	MTHFD1L protein (Methylenetetrahydrofolate dehydrogenase (NADP+ dependent) 1-like) (Monofunctional C1-tetrahydrofolate synthase, mitochondrial)	MTHFD1L	MTHFD1L
17.6352	17.6846	17.5659	17.5946	17.5474	17.5833	sp		2136	57	17.5828	17.6208	-0.0380096	O75643	U520_HUMAN	U5 small nuclear ribonucleoprotein 200 kDa helicase (EC 3.6.4.13) (Activating signal cointegrator 1 complex subunit 3-like 1) (BRR2 homolog) (U5 snRNP-specific 200 kDa protein) (U5-200KD)	SNRNP200 ASCC3L1 HELIC2 KIAA0788	SNRNP200
18.7344	18.6554	18.5222	18.7525	18.7005	18.6619	sp		937	132	18.6524	18.6899	-0.0375423	P63010	AP2B1_HUMAN	AP-2 complex subunit beta (AP105B) (Adaptor protein complex AP-2 subunit beta) (Adaptor-related protein complex 2 subunit beta) (Beta-2-adaptin) (Beta-adaptin) (Clathrin assembly protein complex 2 beta large chain) (Plasma membrane adaptor HA2/AP2 adaptin beta subunit)	AP2B1 ADTB2 CLAPB1	AP2B1
15.5943	15.5304	15.6776	15.6631	15.378	15.5683	sp		431	946	15.5499	15.5873	-0.037322	P55010	IF5_HUMAN	Eukaryotic translation initiation factor 5 (eIF-5)	EIF5	EIF5
18.4936	18.5906	18.5275	18.6807	18.4983	18.3597	tr		200	848	18.5065	18.5437	-0.03722	X1WI28	X1WI28_HUMAN	60S ribosomal protein L10 (Fragment)	RPL10	RPL10
17.7905	17.5256	17.6944	17.8861	17.5522	17.7369	sp		318	1220	17.679	17.7162	-0.0371819	Q8TC12	RDH11_HUMAN	Retinol dehydrogenase 11 (EC 1.1.1.300) (Androgen-regulated short-chain dehydrogenase/reductase 1) (HCV core-binding protein HCBP12) (Prostate short-chain dehydrogenase/reductase 1) (Retinal reductase 1) (RalR1) (Short chain dehydrogenase/reductase family 7C member 1)	RDH11 ARSDR1 PSDR1 SDR7C1 CGI-82	RDH11
16.79	16.8297	16.7649	16.8132	16.8995	16.9215	sp		363	1889	16.8181	16.8548	-0.0366592	Q5HYJ1	TECRL_HUMAN	Trans-2,3-enoyl-CoA reductase-like (EC 1.3.1.-) (Steroid 5-alpha-reductase 2-like 2 protein)	TECRL SRD5A2L2	TECRL
16.6616	16.7113	16.6943	16.7733	16.7881	16.7691	sp		357	938	16.7147	16.7512	-0.0365601	P30533	AMRP_HUMAN	Alpha-2-macroglobulin receptor-associated protein (Alpha-2-MRAP) (Low density lipoprotein receptor-related protein-associated protein 1) (RAP)	LRPAP1 A2MRAP	LRPAP1
18.6959	18.8904	18.673	18.6956	18.796	18.6877	sp		416	688	18.7216	18.7579	-0.0362339	Q9HDC9	APMAP_HUMAN	Adipocyte plasma membrane-associated protein (Protein BSCv)	APMAP C20orf3 UNQ1869/PRO4305	APMAP
15.7723	15.729	15.7501	15.8533	15.8301	15.8788	sp		472	2520	15.7842	15.8204	-0.0361986	P02533	K1C14_HUMAN	Keratin, type I cytoskeletal 14 (Cytokeratin-14) (CK-14) (Keratin-14) (K14)	KRT14	KRT14
14.4362	14.6866	14.7904	14.7759	14.7035	14.5762	sp		454	408	14.6434	14.6796	-0.0361853	P42167	LAP2B_HUMAN	Lamina-associated polypeptide 2, isoforms beta/gamma (Thymopoietin, isoforms beta/gamma) (TP beta/gamma) (Thymopoietin-related peptide isoforms beta/gamma) (TPRP isoforms beta/gamma) [Cleaved into: Thymopoietin (TP) (Splenin);Thymopentin (TP5)]	TMPO LAP2	TMPO
20.0474	19.9941	19.9206	20.0531	19.9891	20.0162	sp		240	1318	19.9857	20.0211	-0.0354271	Q6PI78	TMM65_HUMAN	Transmembrane protein 65	TMEM65	TMEM65
16.3613	16.5579	16.4488	16.4777	16.6193	16.4999	sp		415	1392	16.4765	16.5118	-0.0353508	P52597	HNRPF_HUMAN	Heterogeneous nuclear ribonucleoprotein F (hnRNP F) (Nucleolin-like protein mcs94-1) [Cleaved into: Heterogeneous nuclear ribonucleoprotein F, N-terminally processed]	HNRNPF HNRPF	HNRNPF
18.28	18.2543	18.2076	18.2441	18.1849	18.2782	sp		152	2188	18.2242	18.2589	-0.0347099	Q9Y3D6	FIS1_HUMAN	Mitochondrial fission 1 protein (FIS1 homolog) (hFis1) (Tetratricopeptide repeat protein 11) (TPR repeat protein 11)	FIS1 TTC11 CGI-135	FIS1
17.7682	17.8166	17.75	17.8376	17.7826	17.7504	sp		728	209	17.7669	17.8015	-0.0346031	P05165	PCCA_HUMAN	Propionyl-CoA carboxylase alpha chain, mitochondrial (PCCase subunit alpha) (EC 6.4.1.3) (Propanoyl-CoA:carbon dioxide ligase subunit alpha)	PCCA	PCCA
13.4375	13.5968	14.0018	13.7914	13.5134	13.6673	tr		152	1826	13.6509	13.6852	-0.0342875	K7ELC2	K7ELC2_HUMAN	40S ribosomal protein S15	RPS15	RPS15
16.6305	16.6496	16.6204	16.6676	16.5801	16.615	sp		617	685	16.6104	16.6441	-0.0337162	P38606	VATA_HUMAN	V-type proton ATPase catalytic subunit A (V-ATPase subunit A) (EC 7.1.2.2) (V-ATPase 69 kDa subunit) (Vacuolar ATPase isoform VA68) (Vacuolar proton pump subunit alpha)	ATP6V1A ATP6A1 ATP6V1A1 VPP2	ATP6V1A
20.9065	20.9574	20.9538	20.9654	20.9118	20.9491	sp		256	423	20.924	20.9573	-0.0332775	P24539	AT5F1_HUMAN	ATP synthase F(0) complex subunit B1, mitochondrial (ATP synthase peripheral stalk-membrane subunit b) (ATP synthase proton-transporting mitochondrial F(0) complex subunit B1) (ATP synthase subunit b) (ATPase subunit b)	ATP5PB ATP5F1	ATP5PB
17.2639	17.3291	17.2868	17.2441	17.2973	17.3721	sp		192	1541	17.2827	17.3151	-0.0324516	P63000	RAC1_HUMAN	Ras-related C3 botulinum toxin substrate 1 (EC 3.6.5.2) (Cell migration-inducing gene 5 protein) (Ras-like protein TC25) (p21-Rac1)	RAC1 TC25 MIG5	RAC1
17.4946	17.5087	17.22	17.4118	17.4009	17.2907	sp		353	1483	17.3718	17.4037	-0.0318909	Q3ZCQ8-2	TIM50_HUMAN	Mitochondrial import inner membrane translocase subunit TIM50	TIMM50 TIM50 PRO1512	TIMM50
21.9358	21.9825	21.9465	21.9865	21.9597	21.9681	sp		272	374	21.9473	21.979	-0.0316505	P35232	PHB_HUMAN	Prohibitin	PHB	PHB
16.316	16.365	16.3799	16.2706	16.1713	16.3261	sp		NaN	65	16.2891	16.3206	-0.0314941	Q16891-2	MIC60_HUMAN
17.8031	17.8852	17.9648	17.8316	17.658	17.8032	tr		1927	319	17.8086	17.84	-0.0313683	A6NNK5	A6NNK5_HUMAN	TP53-binding protein 1	TP53BP1	TP53BP1
17.2033	17.3742	17.4236	17.2419	17.1041	17.209	sp		879	916	17.2437	17.275	-0.0313358	Q9H330	TM245_HUMAN	Transmembrane protein 245 (Protein CG-2)	TMEM245 C9orf5	TMEM245
16.1225	16.1297	16.1809	16.2299	16.2286	16.2654	sp		1887	347	16.1773	16.2083	-0.0310173	Q8TEM1	PO210_HUMAN	Nuclear pore membrane glycoprotein 210 (Nuclear pore protein gp210) (Nuclear envelope pore membrane protein POM 210) (POM210) (Nucleoporin Nup210) (Pore membrane protein of 210 kDa)	NUP210 KIAA0906 PSEC0245	NUP210
14.4027	14.3855	14.4404	13.9632	13.6739	14.2614	sp		201	2697	14.1723	14.2034	-0.0310106	Q8TCD5	NT5C_HUMAN	5'(3')-deoxyribonucleotidase, cytosolic type (EC 3.1.3.-) (Cytosolic 5',3'-pyrimidine nucleotidase) (Deoxy-5'-nucleotidase 1) (dNT-1)	NT5C DNT1 UMPH2	NT5C
20.5962	20.6195	20.5739	20.6426	20.5961	20.5969	sp		169	1052	20.5888	20.6197	-0.030899	P13073	COX41_HUMAN	Cytochrome c oxidase subunit 4 isoform 1, mitochondrial (Cytochrome c oxidase polypeptide IV) (Cytochrome c oxidase subunit IV isoform 1) (COX IV-1)	COX4I1 COX4	COX4I1
16.5865	16.6492	16.7599	16.632	16.6101	16.7664	sp		240	1100	16.6522	16.6825	-0.0303555	P51858	HDGF_HUMAN	Hepatoma-derived growth factor (HDGF) (High mobility group protein 1-like 2) (HMG-1L2)	HDGF HMG1L2	HDGF
15.3707	15.2669	15.2468	15.2111	15.23	15.4602	sp		403	927	15.2825	15.3127	-0.0302563	Q7L0Y3	TM10C_HUMAN	tRNA methyltransferase 10 homolog C (HBV pre-S2 trans-regulated protein 2) (Mitochondrial ribonuclease P protein 1) (Mitochondrial RNase P protein 1) (RNA (guanine-9-)-methyltransferase domain-containing protein 1) (Renal carcinoma antigen NY-REN-49) (mRNA methyladenosine-N(1)-methyltransferase) (EC 2.1.1.-) (tRNA (adenine(9)-N(1))-methyltransferase) (EC 2.1.1.218) (tRNA (guanine(9)-N(1))-methylt…	TRMT10C MRPP1 RG9MTD1	TRMT10C
18.9769	18.9715	18.9372	19.0719	18.956	18.917	sp		292	863	18.9567	18.9868	-0.030098	Q14165	MLEC_HUMAN	Malectin	MLEC KIAA0152	MLEC
18.4158	18.4117	18.4012	18.4698	18.3725	18.3982	sp		227	1126	18.3965	18.4265	-0.0300312	O43809	CPSF5_HUMAN	Cleavage and polyadenylation specificity factor subunit 5 (Cleavage and polyadenylation specificity factor 25 kDa subunit) (CPSF 25 kDa subunit) (Cleavage factor Im complex 25 kDa subunit) (CFIm25) (Nucleoside diphosphate-linked moiety X motif 21) (Nudix motif 21) (Nudix hydrolase 21) (Pre-mRNA cleavage factor Im 68 kDa subunit)	NUDT21 CFIM25 CPSF25 CPSF5	NUDT21
15.8589	16.1032	16.0068	15.8837	15.8797	15.8482	sp		530	713	15.9151	15.945	-0.0298939	O75475	PSIP1_HUMAN	PC4 and SFRS1-interacting protein (CLL-associated antigen KW-7) (Dense fine speckles 70 kDa protein) (DFS 70) (Lens epithelium-derived growth factor) (Transcriptional coactivator p75/p52)	PSIP1 DFS70 LEDGF PSIP2	PSIP1
16.2603	16.1239	16.0357	16.3746	16.2316	16.1189	sp		476	1670	16.1759	16.2058	-0.0298882	O43148	MCES_HUMAN	mRNA cap guanine-N7 methyltransferase (EC 2.1.1.56) (RG7MT1) (mRNA (guanine-N(7)-)-methyltransferase) (mRNA cap methyltransferase) (hCMT1) (hMet) (hcm1p)	RNMT KIAA0398	RNMT
20.448	20.523	20.4462	20.4465	20.487	20.4999	tr		307	245	20.4604	20.4898	-0.0293941	F8W6I7	F8W6I7_HUMAN	Heterogeneous nuclear ribonucleoprotein A1	HNRNPA1	HNRNPA1
20.2496	20.304	20.2983	20.2909	20.3152	20.3551	sp		499	343	20.2877	20.3166	-0.0289707	Q13557-10	KCC2D_HUMAN	Calcium/calmodulin-dependent protein kinase type II subunit delta (CaM kinase II subunit delta) (CaMK-II subunit delta) (EC 2.7.11.17)	CAMK2D CAMKD	CAMK2D
19.9451	19.9504	19.9195	20.0088	19.8846	19.8762	sp		165	802	19.9164	19.9451	-0.0287151	P62937	PPIA_HUMAN	Peptidyl-prolyl cis-trans isomerase A (PPIase A) (EC 5.2.1.8) (Cyclophilin A) (Cyclosporin A-binding protein) (Rotamase A) [Cleaved into: Peptidyl-prolyl cis-trans isomerase A, N-terminally processed]	PPIA CYPA	PPIA
17.9318	17.9852	18.0003	17.9568	17.9371	18.0118	sp		962	341	17.9564	17.9846	-0.0282059	O60763	USO1_HUMAN	General vesicular transport factor p115 (Protein USO1 homolog) (Transcytosis-associated protein) (TAP) (Vesicle-docking protein)	USO1 VDP	USO1
17.7142	17.5488	17.0269	17.5782	17.8282	17.5269	tr		552	1321	17.5231	17.5513	-0.0281849	A0A087WXX9	A0A087WXX9_HUMAN	Non-specific serine/threonine protein kinase (EC 2.7.11.1)	PRKAA2	PRKAA2
15.2493	15.3009	15.1451	15.3568	15.4064	15.2274	sp		359	1602	15.2669	15.295	-0.0281162	Q9NX62	IMPA3_HUMAN	Inositol monophosphatase 3 (IMP 3) (IMPase 3) (EC 3.1.3.25) (EC 3.1.3.7) (Golgi 3-prime phosphoadenosine 5-prime phosphate 3-prime phosphatase) (Golgi-resident PAP phosphatase) (gPAPP) (Inositol monophosphatase domain-containing protein 1) (Inositol-1(or 4)-monophosphatase 3) (Myo-inositol monophosphatase A3)	IMPAD1 IMPA3	IMPAD1
18.424	18.4711	18.5793	18.5888	18.5567	18.5841	sp		913	310	18.52	18.548	-0.0280228	Q99613	EIF3C_HUMAN	Eukaryotic translation initiation factor 3 subunit C (eIF3c) (Eukaryotic translation initiation factor 3 subunit 8) (eIF3 p110)	EIF3C EIF3S8	EIF3C
13.3859	14.814	14.6141	14.7281	11.2568	9.79784	sp		300	2304	13.0856	13.1133	-0.0277357	Q15526	SURF1_HUMAN	Surfeit locus protein 1	SURF1 SURF-1	SURF1
20.0169	20.4145	20.1483	20.2358	20.2423	19.84	sp		322	1766	20.1358	20.1635	-0.0276489	Q96S97	MYADM_HUMAN	Myeloid-associated differentiation marker (Protein SB135)	MYADM UNQ553/PRO1110	MYADM
17.4064	17.4804	17.3507	17.1809	17.2946	17.4722	sp		898	349	17.3506	17.3778	-0.0272503	Q92973	TNPO1_HUMAN	Transportin-1 (Importin beta-2) (Karyopherin beta-2) (M9 region interaction protein) (MIP)	TNPO1 KPNB2 MIP1 TRN	TNPO1
16.1931	16.3092	16.2309	16.2131	16.1121	16.0956	tr		268	2299	16.1787	16.206	-0.0272465	K7EK00	K7EK00_HUMAN	Protein FAM210A (Fragment)	FAM210A	FAM210A
16.7841	17.1375	17.1811	16.7317	17.3355	17.5117	sp		2035	614	17.1002	17.127	-0.026783	P51610	HCFC1_HUMAN	Host cell factor 1 (HCF) (HCF-1) (C1 factor) (CFF) (VCAF) (VP16 accessory protein) [Cleaved into: HCF N-terminal chain 1;HCF N-terminal chain 2;HCF N-terminal chain 3;HCF N-terminal chain 4;HCF N-terminal chain 5;HCF N-terminal chain 6;HCF C-terminal chain 1;HCF C-terminal chain 2;HCF C-terminal chain 3;HCF C-terminal chain 4;HCF C-terminal chain 5;HCF C-terminal chain 6]	HCFC1 HCF1 HFC1	HCFC1
16.1395	16.6441	16.2138	16.1023	16.4232	16.1105	tr		1245	234	16.2588	16.2856	-0.0267754	F8VXC8	F8VXC8_HUMAN	SWI/SNF complex subunit SMARCC2	SMARCC2	SMARCC2
17.341	17.3069	17.2632	17.3346	17.2259	17.267	tr		536	640	17.2767	17.3028	-0.0260944	Q5T5C7	Q5T5C7_HUMAN	Serine--tRNA ligase, cytoplasmic	SARS	SARS
20.9951	21.025	20.9914	21.0055	20.9804	21.0126	sp		760	145	20.989	21.0144	-0.0253906	P02786	TFR1_HUMAN	Transferrin receptor protein 1 (TR) (TfR) (TfR1) (Trfr) (T9) (p90) (CD antigen CD71) [Cleaved into: Transferrin receptor protein 1, serum form (sTfR)]	TFRC	TFRC
15.4097	15.413	15.5784	15.6209	15.8681	15.8965	sp		731	1159	15.6187	15.6435	-0.0247459	Q8TBA6	GOGA5_HUMAN	Golgin subfamily A member 5 (Cell proliferation-inducing gene 31 protein) (Golgin-84) (Protein Ret-II) (RET-fused gene 5 protein)	GOLGA5 RETII RFG5 PIG31	GOLGA5
13.5105	12.0998	13.4183	13.3423	11.7447	13.3054	sp		633	953	12.8911	12.9158	-0.0246925	O76031	CLPX_HUMAN	ATP-dependent Clp protease ATP-binding subunit clpX-like, mitochondrial	CLPX	CLPX
14.8968	14.8308	14.9408	14.8971	14.8983	15.0816	sp		144	1767	14.9119	14.9365	-0.0245829	O14602	IF1AY_HUMAN	Eukaryotic translation initiation factor 1A, Y-chromosomal (eIF-1A Y isoform) (Eukaryotic translation initiation factor 4C) (eIF-4C)	EIF1AY	EIF1AY
20.2094	20.1898	20.2435	20.197	20.0588	20.1986	sp		480	254	20.1706	20.1951	-0.0245285	P31930	QCR1_HUMAN	Cytochrome b-c1 complex subunit 1, mitochondrial (Complex III subunit 1) (Core protein I) (Ubiquinol-cytochrome-c reductase complex core protein 1)	UQCRC1	UQCRC1
18.8886	18.9086	18.9195	18.939	18.9355	18.9696	sp		356	575	18.9146	18.9391	-0.0244904	Q9UJZ1	STML2_HUMAN	Stomatin-like protein 2, mitochondrial (SLP-2) (EPB72-like protein 2) (Paraprotein target 7) (Paratarg-7)	STOML2 SLP2 HSPC108	STOML2
11.7671	9.94506	9.16322	14.0044	13.8704	10.9244	sp		644	2151	11.6002	11.6246	-0.024416	Q14166	TTL12_HUMAN	Tubulin--tyrosine ligase-like protein 12 (Inactive tubulin--tyrosine ligase-like protein 12)	TTLL12 KIAA0153	TTLL12
18.1052	17.9728	17.9376	17.673	17.3713	17.8411	tr		470	689	17.8047	17.829	-0.0243149	H0Y4R1	H0Y4R1_HUMAN	Inosine-5'-monophosphate dehydrogenase 2 (Fragment)	IMPDH2	IMPDH2
16.9495	17.0896	17.0445	16.9989	17.0542	17.0312	tr		192	2475	17.0161	17.0399	-0.023838	J3QW43	J3QW43_HUMAN	Mannose-P-dolichol utilization defect 1 protein	MPDU1	MPDU1
16.0968	15.9278	16.1018	16.0808	15.9827	16.2438	sp		490	1123	16.0604	16.0841	-0.0236912	O76021	RL1D1_HUMAN	Ribosomal L1 domain-containing protein 1 (CATX-11) (Cellular senescence-inhibited gene protein) (Protein PBK1)	RSL1D1 CATX11 CSIG PBK1 L12	RSL1D1
15.408	15.4638	15.6847	15.5072	13.5657	13.7573	sp		407	1633	14.8861	14.9095	-0.023324	Q15119	PDK2_HUMAN	[Pyruvate dehydrogenase (acetyl-transferring)] kinase isozyme 2, mitochondrial (EC 2.7.11.2) (Pyruvate dehydrogenase kinase isoform 2) (PDH kinase 2) (PDKII)	PDK2 PDHK2	PDK2
16.9524	16.7894	16.7492	16.9131	16.9273	16.9957	sp		206	2265	16.8763	16.8994	-0.023077	Q14197	ICT1_HUMAN	Peptidyl-tRNA hydrolase ICT1, mitochondrial (EC 3.1.1.29) (39S ribosomal protein L58, mitochondrial) (MRP-L58) (Digestion substraction 1) (DS-1) (Immature colon carcinoma transcript 1 protein) (Mitochondrial large ribosomal subunit protein mL62)	MRPL58 DS1 ICT1	MRPL58
14.2078	14.4716	14.0083	14.3625	14.2637	13.7147	tr		268	2060	14.1599	14.1829	-0.0229626	A0A286YF37	A0A286YF37_HUMAN	F-box only protein 2 (Fragment)	FBXO2	FBXO2
13.592	13.7363	13.7334	13.6728	13.6458	13.6307	tr		532	2602	13.6571	13.6799	-0.0228586	B1AKN8	B1AKN8_HUMAN	Nuclear factor 1	NFIA	NFIA
17.3877	17.4107	17.4812	17.4908	17.2868	17.3223	sp		195	1416	17.3852	17.4079	-0.0226727	Q9H061	T126A_HUMAN	Transmembrane protein 126A	TMEM126A	TMEM126A
20.2435	20.3141	20.2328	20.2661	20.2956	20.2583	tr		263	662	20.2573	20.2795	-0.0222073	C9J9K3	C9J9K3_HUMAN	40S ribosomal protein SA (Fragment)	RPSA	RPSA
18.7932	18.8252	18.7528	18.818	18.8852	18.8537	sp		280	800	18.8104	18.8323	-0.0218773	P21912	SDHB_HUMAN	Succinate dehydrogenase [ubiquinone] iron-sulfur subunit, mitochondrial (EC 1.3.5.1) (Iron-sulfur subunit of complex II) (Ip)	SDHB SDH SDH1	SDHB
15.8403	15.7685	15.8759	15.8996	15.8283	15.9415	sp		86	2503	15.8482	15.8699	-0.0217018	P62306	RUXF_HUMAN	Small nuclear ribonucleoprotein F (snRNP-F) (Sm protein F) (Sm-F) (SmF)	SNRPF PBSCF	SNRPF
17.5892	17.7437	17.6785	17.4703	17.646	17.7643	sp		483	787	17.6379	17.6594	-0.0215645	P26196	DDX6_HUMAN	Probable ATP-dependent RNA helicase DDX6 (EC 3.6.4.13) (ATP-dependent RNA helicase p54) (DEAD box protein 6) (Oncogene RCK)	DDX6 HLR2 RCK	DDX6
16.282	16.2974	16.1114	16.2742	16.4714	16.3561	sp		957	958	16.2883	16.3093	-0.0209942	O75400	PR40A_HUMAN	Pre-mRNA-processing factor 40 homolog A (Fas ligand-associated factor 1) (Formin-binding protein 11) (Formin-binding protein 3) (Huntingtin yeast partner A) (Huntingtin-interacting protein 10) (HIP-10) (Huntingtin-interacting protein A) (Renal carcinoma antigen NY-REN-6)	PRPF40A FBP11 FLAF1 FNBP3 HIP10 HYPA HSPC225	PRPF40A
13.754	13.6662	13.3256	13.6355	13.5228	13.3632	sp		332	2331	13.5342	13.555	-0.0208092	O14656	TOR1A_HUMAN	Torsin-1A (Dystonia 1 protein) (Torsin ATPase-1A) (EC 3.6.4.-) (Torsin family 1 member A)	TOR1A DQ2 DYT1 TA TORA	TOR1A
18.0174	17.7075	17.7551	18.0887	18.0683	18.1066	sp		953	181	17.9469	17.9676	-0.0206528	P53618	COPB_HUMAN	Coatomer subunit beta (Beta-coat protein) (Beta-COP)	COPB1 COPB MSTP026	COPB1
21.9199	21.9594	21.9242	21.937	21.9326	21.9412	sp		607	168	21.9256	21.9458	-0.0202827	P04843	RPN1_HUMAN	Dolichyl-diphosphooligosaccharide--protein glycosyltransferase subunit 1 (Dolichyl-diphosphooligosaccharide--protein glycosyltransferase 67 kDa subunit) (Ribophorin I) (RPN-I) (Ribophorin-1)	RPN1	RPN1
18.0571	18.0678	18.0636	18.1414	18.0263	17.9973	sp		331	1022	18.049	18.0688	-0.0198402	Q8NBN7	RDH13_HUMAN	Retinol dehydrogenase 13 (EC 1.1.1.300) (Short chain dehydrogenase/reductase family 7C member 3)	RDH13 SDR7C3 PSEC0082 UNQ736/PRO1430	RDH13
16.1231	15.7686	15.7347	15.9835	15.6491	15.8137	sp		226	2202	15.8357	15.8553	-0.0196142	P36543	VATE1_HUMAN	V-type proton ATPase subunit E 1 (V-ATPase subunit E 1) (V-ATPase 31 kDa subunit) (p31) (Vacuolar proton pump subunit E 1)	ATP6V1E1 ATP6E ATP6E2	ATP6V1E1
16.1988	16.2884	16.1125	16.3867	16.299	15.9928	sp		555	607	16.2034	16.2226	-0.019207	Q96S52	PIGS_HUMAN	GPI transamidase component PIG-S (Phosphatidylinositol-glycan biosynthesis class S protein)	PIGS UNQ1873/PRO4316	PIGS
14.6642	14.7424	14.7406	14.7085	14.5264	14.5375	sp		531	1693	14.6437	14.6628	-0.0190678	Q6P1J9	CDC73_HUMAN	Parafibromin (Cell division cycle protein 73 homolog) (Hyperparathyroidism 2 protein)	CDC73 C1orf28 HRPT2	CDC73
18.9184	18.9895	19.0565	19.1216	19.0223	18.9432	sp		192	1064	18.999	19.0181	-0.0190258	P32969	RL9_HUMAN	60S ribosomal protein L9 (Large ribosomal subunit protein uL6)	RPL9 OK/SW-cl.103;RPL9P7;RPL9P8;RPL9P9	RPL9
19.2418	19.4103	19.2366	19.2823	19.1969	19.0383	sp		245	682	19.2251	19.2437	-0.0185604	P27348	1433T_HUMAN	14-3-3 protein theta (14-3-3 protein T-cell) (14-3-3 protein tau) (Protein HS1)	YWHAQ	YWHAQ
17.5652	17.5226	17.4947	17.4122	17.2655	17.446	sp		239	1782	17.4418	17.4603	-0.0184097	P28072	PSB6_HUMAN	Proteasome subunit beta type-6 (EC 3.4.25.1) (Macropain delta chain) (Multicatalytic endopeptidase complex delta chain) (Proteasome delta chain) (Proteasome subunit Y)	PSMB6 LMPY Y	PSMB6
15.518	15.5649	15.6431	15.9838	16.0823	15.7498	sp		606	1168	15.7478	15.7662	-0.0183725	O60662	KLH41_HUMAN	Kelch-like protein 41 (Kel-like protein 23) (Kelch repeat and BTB domain-containing protein 10) (Kelch-related protein 1) (Sarcosin)	KLHL41 KBTBD10 KRP1	KLHL41
17.9568	18.0507	18.0681	18.0865	18.0025	17.9447	sp		150	991	18.0091	18.0273	-0.0181599	P20674	COX5A_HUMAN	Cytochrome c oxidase subunit 5A, mitochondrial (Cytochrome c oxidase polypeptide Va)	COX5A	COX5A
16.2384	16.2236	16.2278	16.2672	16.2225	16.2519	sp		466	826	16.2295	16.2476	-0.018055	Q13283	G3BP1_HUMAN	Ras GTPase-activating protein-binding protein 1 (G3BP-1) (EC 3.6.4.12) (EC 3.6.4.13) (ATP-dependent DNA helicase VIII) (hDH VIII) (GAP SH3 domain-binding protein 1)	G3BP1 G3BP	G3BP1
15.9686	16.6605	16.7247	16.4032	16.7371	16.4204	tr		325	2196	16.4768	16.4947	-0.0179291	C9JW74	C9JW74_HUMAN	Mesoderm-specific transcript homolog protein	MEST	MEST
15.4796	13.2481	13.8572	15.8166	15.5511	15.8762	tr		184	2206	14.9626	14.9803	-0.0176497	A0A087WVZ9	A0A087WVZ9_HUMAN	DNA-directed RNA polymerases I, II, and III subunit RPABC1	POLR2E	POLR2E
18.7051	18.769	18.7076	18.7617	18.748	18.6824	tr		472	495	18.7202	18.7377	-0.0174656	G8JLB6	G8JLB6_HUMAN	Heterogeneous nuclear ribonucleoprotein H	HNRNPH1	HNRNPH1
14.0846	14.0826	14.2464	14.0403	14.0017	14.2616	sp		230	2590	14.1109	14.1282	-0.0173311	Q8IUX1	T126B_HUMAN	Complex I assembly factor TMEM126B, mitochondrial (Transmembrane protein 126B)	TMEM126B HT007	TMEM126B
19.8685	19.8845	19.8825	19.8935	19.8643	19.8889	sp		326	895	19.8718	19.889	-0.01721	Q15717-2	ELAV1_HUMAN	ELAV-like protein 1 (Hu-antigen R) (HuR)	ELAVL1 HUR	ELAVL1
18.2599	18.3084	18.342	18.3406	18.308	18.3111	sp		876	412	18.3033	18.32	-0.0167236	Q9BXP5	SRRT_HUMAN	Serrate RNA effector molecule homolog (Arsenite-resistance protein 2)	SRRT ARS2 ASR2	SRRT
14.899	15.0067	15.0828	15.0697	15.086	15.0403	sp		1034	1683	15.0226	15.0389	-0.0162992	Q9NWH9	SLTM_HUMAN	SAFB-like transcription modulator (Modulator of estrogen-induced transcription)	SLTM MET	SLTM
18.8738	18.899	18.9276	18.9512	18.8929	18.8914	sp		314	680	18.8981	18.9139	-0.0157547	Q96DB5	RMD1_HUMAN	Regulator of microtubule dynamics protein 1 (RMD-1) (hRMD-1) (Protein FAM82B)	RMDN1 FAM82B CGI-90	RMDN1
15.6685	15.7934	15.5948	15.7648	15.7852	15.5368	sp		641	1982	15.6828	15.6984	-0.0155106	Q9Y2W2	WBP11_HUMAN	WW domain-binding protein 11 (WBP-11) (Npw38-binding protein) (NpwBP) (SH3 domain-binding protein SNP70) (Splicing factor that interacts with PQBP-1 and PP1)	WBP11 NPWBP SIPP1 SNP70	WBP11
18.7097	18.7732	18.8042	18.7151	18.6669	18.7368	sp		632	386	18.7269	18.7417	-0.0147686	A1L0T0	ILVBL_HUMAN	Acetolactate synthase-like protein (EC 2.2.1.-) (IlvB-like protein)	ILVBL AHAS	ILVBL
14.5195	14.3134	14.0806	14.551	14.5799	14.3582	sp		493	2246	14.3933	14.4075	-0.014204	P12955	PEPD_HUMAN	Xaa-Pro dipeptidase (X-Pro dipeptidase) (EC 3.4.13.9) (Imidodipeptidase) (Peptidase D) (Proline dipeptidase) (Prolidase)	PEPD PRD	PEPD
21.574	21.5729	21.5681	21.58	21.5529	21.5842	sp		314	549	21.565	21.579	-0.0140095	Q02978	M2OM_HUMAN	Mitochondrial 2-oxoglutarate/malate carrier protein (OGCP) (Solute carrier family 25 member 11)	SLC25A11 SLC20A4	SLC25A11
17.1965	17.2177	17.2848	17.273	17.2432	17.2741	sp		1098	598	17.2415	17.2549	-0.0134296	O14776	TCRG1_HUMAN	Transcription elongation regulator 1 (TATA box-binding protein-associated factor 2S) (Transcription factor CA150)	TCERG1 CA150 TAF2S	TCERG1
17.3373	17.2444	17.449	17.2326	17.1071	17.456	sp		524	624	17.2978	17.311	-0.0132198	Q9BZZ5	API5_HUMAN	Apoptosis inhibitor 5 (API-5) (Antiapoptosis clone 11 protein) (AAC-11) (Cell migration-inducing gene 8 protein) (Fibroblast growth factor 2-interacting factor) (FIF) (Protein XAGL)	API5 MIG8	API5
16.6491	16.6846	16.7454	16.8037	16.659	16.6041	sp		411	1571	16.6845	16.6975	-0.0129566	P38919	IF4A3_HUMAN	Eukaryotic initiation factor 4A-III (eIF-4A-III) (eIF4A-III) (EC 3.6.4.13) (ATP-dependent RNA helicase DDX48) (ATP-dependent RNA helicase eIF4A-3) (DEAD box protein 48) (Eukaryotic initiation factor 4A-like NUK-34) (Eukaryotic translation initiation factor 4A isoform 3) (Nuclear matrix protein 265) (NMP 265) (hNMP 265) [Cleaved into: Eukaryotic initiation factor 4A-III, N-terminally processed]	EIF4A3 DDX48 KIAA0111	EIF4A3
16.3801	16.4169	16.6024	16.4939	16.5116	16.6209	sp		346	1590	16.498	16.5105	-0.0125179	P31942	HNRH3_HUMAN	Heterogeneous nuclear ribonucleoprotein H3 (hnRNP H3) (Heterogeneous nuclear ribonucleoprotein 2H9) (hnRNP 2H9)	HNRNPH3 HNRPH3	HNRNPH3
15.7829	15.8251	15.7136	15.5282	15.401	15.5817	sp		930	1087	15.6325	15.645	-0.0124884	P98175	RBM10_HUMAN	RNA-binding protein 10 (G patch domain-containing protein 9) (RNA-binding motif protein 10) (RNA-binding protein S1-1) (S1-1)	RBM10 DXS8237E GPATC9 GPATCH9 KIAA0122	RBM10
20.6713	20.7213	20.7062	20.7183	20.7477	20.723	sp		678	126	20.7084	20.7209	-0.0124359	O75746	CMC1_HUMAN	Calcium-binding mitochondrial carrier protein Aralar1 (Mitochondrial aspartate glutamate carrier 1) (Solute carrier family 25 member 12)	SLC25A12 ARALAR1	SLC25A12
19.7314	19.7298	19.7414	19.6251	19.6125	19.7674	tr		2297	38	19.6951	19.7074	-0.012352	E7EVA0	E7EVA0_HUMAN	Microtubule-associated protein	MAP4	MAP4
16.5295	16.4568	16.6276	16.6623	16.4875	16.5614	sp		342	1379	16.5482	16.5602	-0.0120087	Q9GZY8-2	MFF_HUMAN	Mitochondrial fission factor	MFF C2orf33 AD030 AD033 GL004	MFF
17.2477	16.8627	16.9708	17.1566	17.0851	17.3202	sp		1096	1198	17.1012	17.1131	-0.0119228	Q6PKG0	LARP1_HUMAN	La-related protein 1 (La ribonucleoprotein domain family member 1)	LARP1 KIAA0731 LARP	LARP1
14.7303	14.8652	14.671	14.6077	14.7583	14.722	sp		447	887	14.7198	14.7316	-0.0118046	P31150	GDIA_HUMAN	Rab GDP dissociation inhibitor alpha (Rab GDI alpha) (Guanosine diphosphate dissociation inhibitor 1) (GDI-1) (Oligophrenin-2) (Protein XAP-4)	GDI1 GDIL OPHN2 RABGDIA XAP4	GDI1
17.1314	17.4191	17.4579	17.1617	17.563	17.6066	sp		412	902	17.3841	17.3958	-0.0117264	Q14318	FKBP8_HUMAN	Peptidyl-prolyl cis-trans isomerase FKBP8 (PPIase FKBP8) (EC 5.2.1.8) (38 kDa FK506-binding protein) (38 kDa FKBP) (FKBP-38) (hFKBP38) (FK506-binding protein 8) (FKBP-8) (FKBPR38) (Rotamase)	FKBP8 FKBP38	FKBP8
18.4225	18.4197	18.419	18.4085	18.44	18.4873	sp		51	2332	18.4272	18.4385	-0.0113335	Q5VTU8	AT5EL_HUMAN	ATP synthase subunit epsilon-like protein, mitochondrial (ATP synthase F1 subunit epsilon pseudogene 2)	ATP5F1EP2 ATP5EP2	ATP5F1EP2
23.2952	23.2917	23.2824	23.322	23.37	23.3663	cont		NaN	630	23.3158	23.3266	-0.0107918	52	sp
14.3005	12.8283	12.7601	14.5555	14.5639	14.2729	tr		489	2234	13.8748	13.8855	-0.0107021	J3KPP4	J3KPP4_HUMAN	Cisplatin resistance-associated overexpressed protein, isoform CRA_b (Luc7-like protein 3)	LUC7L3 CROP hCG_27416	LUC7L3
16.8086	16.8821	16.9228	16.8814	16.9154	16.9138	sp		186	1773	16.8823	16.8925	-0.0101757	O95169	NDUB8_HUMAN	NADH dehydrogenase [ubiquinone] 1 beta subcomplex subunit 8, mitochondrial (Complex I-ASHI) (CI-ASHI) (NADH-ubiquinone oxidoreductase ASHI subunit)	NDUFB8	NDUFB8
17.3737	17.2723	16.9135	17.2072	17.3402	17.1775	sp		577	1074	17.2091	17.219	-0.00987434	O95793	STAU1_HUMAN	Double-stranded RNA-binding protein Staufen homolog 1	STAU1 STAU	STAU1
15.7402	15.8254	15.7206	15.7609	15.9808	15.8826	sp		211	1238	15.8138	15.823	-0.00914955	Q9BRJ7	TIRR_HUMAN	Tudor-interacting repair regulator protein (NUDT16-like protein 1) (Protein syndesmos)	NUDT16L1 SDOS TIRR	NUDT16L1
15.3264	15.8073	16.073	15.922	15.9249	15.6216	sp		759	1499	15.7748	15.7837	-0.00889587	Q13619	CUL4A_HUMAN	Cullin-4A (CUL-4A)	CUL4A	CUL4A
18.0276	17.9644	17.9152	17.9742	18.0565	18.0854	sp		423	2049	17.9998	18.008	-0.00821304	P11117	PPAL_HUMAN	Lysosomal acid phosphatase (LAP) (EC 3.1.3.2)	ACP2	ACP2
21.7587	21.7876	21.7875	21.7901	21.7651	21.7578	sp		226	1240	21.7704	21.7785	-0.00803375	P16401	H15_HUMAN	Histone H1.5 (Histone H1a) (Histone H1b) (Histone H1s-3)	HIST1H1B H1F5	HIST1H1B
15.9453	15.962	15.9598	15.7803	15.8514	16.038	sp		89	2313	15.9188	15.9268	-0.00794411	Q9Y5J7	TIM9_HUMAN	Mitochondrial import inner membrane translocase subunit Tim9	TIMM9 TIM9 TIM9A TIMM9A	TIMM9
16.8438	16.9581	17.0139	16.7619	16.8037	16.9649	sp		446	733	16.8871	16.895	-0.00782585	Q9BUF5	TBB6_HUMAN	Tubulin beta-6 chain (Tubulin beta class V)	TUBB6	TUBB6
14.079	13.6161	14.4405	14.4875	14.2346	14.6732	sp		208	1743	14.2514	14.2589	-0.00754261	Q8WUY1	THEM6_HUMAN	Protein THEM6 (Mesenchymal stem cell protein DSCD75) (Thioesterase superfamily member 6)	THEM6 C8orf55 PSEC0098	THEM6
14.5058	14.1642	14.7187	15.0508	14.8074	14.8392	sp		223	2557	14.6773	14.6848	-0.00747681	Q99720	SGMR1_HUMAN	Sigma non-opioid intracellular receptor 1 (Aging-associated gene 8 protein) (SR31747-binding protein) (SR-BP) (Sigma 1-type opioid receptor) (SIG-1R) (Sigma1-receptor) (Sigma1R) (hSigmaR1)	SIGMAR1 OPRS1 SRBP AAG8	SIGMAR1
16.9405	16.8271	16.974	16.863	16.1684	16.4151	sp		1416	241	16.6943	16.7018	-0.00743675	Q9BZF9	UACA_HUMAN	Uveal autoantigen with coiled-coil domains and ankyrin repeats	UACA KIAA1561	UACA
16.4994	15.6214	16.6748	17.0954	16.6552	17.1341	sp		163	1786	16.6098	16.617	-0.00716591	Q9BX68	HINT2_HUMAN	Histidine triad nucleotide-binding protein 2, mitochondrial (HINT-2) (EC 3.-.-.-) (HINT-3) (HIT-17kDa) (PKCI-1-related HIT protein)	HINT2	HINT2
20.8011	20.8171	20.8094	20.8332	20.804	20.7855	sp		858	76	20.8048	20.8119	-0.00712204	P13639	EF2_HUMAN	Elongation factor 2 (EF-2)	EEF2 EF2	EEF2
16.3626	16.4155	16.3822	16.25	16.3216	16.422	sp		873	812	16.3555	16.3625	-0.00704002	P98155	VLDLR_HUMAN	Very low-density lipoprotein receptor (VLDL receptor) (VLDL-R)	VLDLR	VLDLR
17.3604	17.331	17.1897	17.3177	17.2954	17.218	sp		563	670	17.2819	17.2889	-0.00703049	Q969V3	NCLN_HUMAN	Nicalin (Nicastrin-like protein)	NCLN	NCLN
19.6828	19.785	19.7284	19.7381	19.7149	19.6239	sp		535	447	19.7087	19.7157	-0.00695038	Q02252	MMSA_HUMAN	Methylmalonate-semialdehyde dehydrogenase [acylating], mitochondrial (MMSDH) (Malonate-semialdehyde dehydrogenase [acylating]) (EC 1.2.1.18) (EC 1.2.1.27) (Aldehyde dehydrogenase family 6 member A1)	ALDH6A1 MMSDH	ALDH6A1
13.6645	13.7069	13.4366	13.6065	13.6822	13.4902	tr		148	2679	13.5944	13.6012	-0.00680542	C9JLU1	C9JLU1_HUMAN	DNA-directed RNA polymerases I, II, and III subunit RPABC3 (Fragment)	POLR2H	POLR2H
16.5208	17.5601	16.9251	16.8985	17.3138	16.3213	sp		1401	569	16.9199	16.9266	-0.00673103	Q6P2E9	EDC4_HUMAN	Enhancer of mRNA-decapping protein 4 (Autoantigen Ge-1) (Autoantigen RCD-8) (Human enhancer of decapping large subunit) (Hedls)	EDC4 HEDLS	EDC4
14.3143	14.3041	14.1806	14.3506	14.2411	14.1	sp		442	2068	14.2453	14.2516	-0.00624561	P43694	GATA4_HUMAN	Transcription factor GATA-4 (GATA-binding factor 4)	GATA4	GATA4
17.8651	18.0051	17.7062	17.7681	17.8676	17.6843	sp		2363	60	17.813	17.8192	-0.00622559	P12270	TPR_HUMAN	Nucleoprotein TPR (Megator) (NPC-associated intranuclear protein) (Translocated promoter region protein)	TPR	TPR
20.5676	20.5709	20.5714	20.6187	20.6682	20.6348	sp		806	48	20.6024	20.6081	-0.00574875	P55072	TERA_HUMAN	Transitional endoplasmic reticulum ATPase (TER ATPase) (EC 3.6.4.6) (15S Mg(2+)-ATPase p97 subunit) (Valosin-containing protein) (VCP)	VCP	VCP
18.3644	18.3878	18.3773	18.418	18.4058	18.3573	tr		252	954	18.3825	18.3877	-0.00519943	G3V5Z7	G3V5Z7_HUMAN	Proteasome subunit alpha type (EC 3.4.25.1)	PSMA6	PSMA6
16.9551	16.9855	16.9194	16.8584	16.969	17.0134	tr		319	1006	16.9479	16.9525	-0.00458717	G5E9W7	G5E9W7_HUMAN	28S ribosomal protein S22, mitochondrial (Mitochondrial ribosomal protein S22, isoform CRA_e)	MRPS22 hCG_17223	MRPS22
18.3765	18.4744	18.522	18.6498	18.9122	18.6995	sp		271	2325	18.6035	18.6079	-0.00437546	Q8NBV4	PLPP7_HUMAN	Inactive phospholipid phosphatase 7 (Phosphatidic acid phosphatase type 2 domain-containing protein 3)	PLPP7 C9orf67 PPAPDC3	PLPP7
20.5125	20.5455	20.503	20.5034	20.5324	20.5119	sp		825	88	20.516	20.5203	-0.00429153	Q00839	HNRPU_HUMAN	Heterogeneous nuclear ribonucleoprotein U (hnRNP U) (GRIP120) (Nuclear p120 ribonucleoprotein) (Scaffold-attachment factor A) (SAF-A) (p120) (pp120)	HNRNPU C1orf199 HNRPU SAFA U21.1	HNRNPU
18.4287	18.4881	18.4643	18.4506	18.4922	18.4587	sp		246	1140	18.4617	18.4658	-0.00407982	P51572	BAP31_HUMAN	B-cell receptor-associated protein 31 (BCR-associated protein 31) (Bap31) (6C6-AG tumor-associated antigen) (Protein CDM) (p28)	BCAP31 BAP31 DXS1357E	BCAP31
19.9728	19.968	19.9947	19.9436	19.8849	19.9523	sp		249	1097	19.9508	19.9547	-0.00389099	Q9P0L0	VAPA_HUMAN	Vesicle-associated membrane protein-associated protein A (VAMP-A) (VAMP-associated protein A) (VAP-A) (33 kDa VAMP-associated protein) (VAP-33)	VAPA VAP33	VAPA
20.656	20.6547	20.6401	20.6441	20.6447	20.6535	sp		655	134	20.6469	20.6508	-0.00381088	P49748-3	ACADV_HUMAN	Very long-chain specific acyl-CoA dehydrogenase, mitochondrial (VLCAD) (EC 1.3.8.9)	ACADVL VLCAD	ACADVL
14.6176	14.6594	14.4168	14.4164	14.3146	14.2808	sp		153	2519	14.4497	14.4522	-0.00255394	Q9NX24	NHP2_HUMAN	H/ACA ribonucleoprotein complex subunit 2 (Nucleolar protein family A member 2) (snoRNP protein NHP2)	NHP2 NOLA2 HSPC286	NHP2
17.5287	17.5465	17.5499	17.5107	17.579	17.6077	sp		126	2581	17.5526	17.5549	-0.002388	Q99880	H2B1L_HUMAN	Histone H2B type 1-L (Histone H2B.c) (H2B/c)	HIST1H2BL H2BFC	HIST1H2BL
19.2442	19.4553	19.4412	19.2538	19.4872	19.4695	sp		373	568	19.3909	19.3929	-0.00201797	Q15738	NSDHL_HUMAN	Sterol-4-alpha-carboxylate 3-dehydrogenase, decarboxylating (EC 1.1.1.170) (Protein H105e3)	NSDHL H105E3	NSDHL
19.4105	19.419	19.4433	19.4445	19.4263	19.4225	sp		152	1075	19.4267	19.4287	-0.00197411	P62269	RS18_HUMAN	40S ribosomal protein S18 (Ke-3) (Ke3) (Small ribosomal subunit protein uS13)	RPS18 D6S218E	RPS18
17.0913	17.3175	17.4816	17.5062	17.7558	17.5086	sp		195	1136	17.4429	17.4441	-0.00119972	Q99653	CHP1_HUMAN	Calcineurin B homologous protein 1 (Calcineurin B-like protein) (Calcium-binding protein CHP) (Calcium-binding protein p22) (EF-hand calcium-binding domain-containing protein p22)	CHP1 CHP	CHP1
19.9337	19.844	20.302	19.8878	19.8871	20.3938	sp		1394	19	20.0409	20.0418	-0.000923157	P42704	LPPRC_HUMAN	Leucine-rich PPR motif-containing protein, mitochondrial (130 kDa leucine-rich protein) (LRP 130) (GP130)	LRPPRC LRP130	LRPPRC
16.2897	16.0221	15.1585	15.9688	16.1195	15.5793	tr		453	1470	15.8559	15.8567	-0.000812531	H0YAK1	H0YAK1_HUMAN	G-rich sequence factor 1 (Fragment)	GRSF1	GRSF1
16.064	16.0431	16.102	16.0165	16.0144	16.1201	sp		396	989	16.0601	16.0599	0.000282288	P82933	RT09_HUMAN	28S ribosomal protein S9, mitochondrial (MRP-S9) (S9mt) (Mitochondrial small ribosomal subunit protein uS9m)	MRPS9 RPMS9	MRPS9
19.0625	19.9634	19.3177	19.5319	20.1209	19.0045	sp		780	202	19.5003	19.4999	0.000413895	P08237-3	PFKAM_HUMAN	ATP-dependent 6-phosphofructokinase, muscle type (ATP-PFK) (PFK-M) (EC 2.7.1.11) (6-phosphofructokinase type A) (Phosphofructo-1-kinase isozyme A) (PFK-A) (Phosphohexokinase)	PFKM PFKX	PFKM
18.9519	18.9918	18.9651	18.9937	19.0102	18.9355	sp		211	1627	18.9757	18.9737	0.00208664	P26373	RL13_HUMAN	60S ribosomal protein L13 (Breast basic conserved protein 1) (Large ribosomal subunit protein eL13)	RPL13 BBC1 OK/SW-cl.46	RPL13
19.7867	19.7401	19.7448	19.7587	19.7489	19.7729	sp		698	131	19.7601	19.7572	0.00289917	P02787	TRFE_HUMAN	Serotransferrin (Transferrin) (Beta-1 metal-binding globulin) (Siderophilin)	TF PRO1400	TF
15.0214	14.8489	14.8224	14.7472	14.7725	15.0109	sp		494	2448	14.8721	14.869	0.00307274	Q08170	SRSF4_HUMAN	Serine/arginine-rich splicing factor 4 (Pre-mRNA-splicing factor SRP75) (SRP001LB) (Splicing factor, arginine/serine-rich 4)	SRSF4 SFRS4 SRP75	SRSF4
13.9041	14.46	14.3174	13.162	13.8819	14.4719	tr		387	651	14.0345	14.0313	0.00317383	A0A087WZN1	A0A087WZN1_HUMAN	Isocitrate dehydrogenase [NAD] subunit, mitochondrial	IDH3B hCG_39616	IDH3B
20.3235	20.2925	20.3211	20.3102	20.2812	20.3099	sp		545	170	20.3086	20.3042	0.00437927	P49368	TCPG_HUMAN	T-complex protein 1 subunit gamma (TCP-1-gamma) (CCT-gamma) (hTRiC5)	CCT3 CCTG TRIC5	CCT3
13.8777	14.0296	14.2421	14.1526	13.9984	13.921	sp		1105	1813	14.0394	14.0344	0.00499153	Q92922	SMRC1_HUMAN	SWI/SNF complex subunit SMARCC1 (BRG1-associated factor 155) (BAF155) (SWI/SNF complex 155 kDa subunit) (SWI/SNF-related matrix-associated actin-dependent regulator of chromatin subfamily C member 1)	SMARCC1 BAF155	SMARCC1
19.4597	19.5559	19.5548	19.5378	19.6389	19.5432	sp		248	437	19.5511	19.5456	0.00553513	P18124	RL7_HUMAN	60S ribosomal protein L7 (Large ribosomal subunit protein uL30)	RPL7	RPL7
15.3356	15.4802	14.68	14.5007	15.0766	15.093	sp		1360	1464	15.0307	15.0246	0.00614166	P52701	MSH6_HUMAN	DNA mismatch repair protein Msh6 (hMSH6) (G/T mismatch-binding protein) (GTBP) (GTMBP) (MutS protein homolog 6) (MutS-alpha 160 kDa subunit) (p160)	MSH6 GTBP	MSH6
17.9848	17.9962	18.0261	17.9854	18.0205	18.0312	sp		614	727	18.0104	18.0043	0.00618553	P17844	DDX5_HUMAN	Probable ATP-dependent RNA helicase DDX5 (EC 3.6.4.13) (DEAD box protein 5) (RNA helicase p68)	DDX5 G17P1 HELR HLR1	DDX5
14.1748	13.9584	13.8836	14.2008	14.8603	14.7397	sp		1235	1855	14.3062	14.2996	0.00656986	P46019	KPB2_HUMAN	Phosphorylase b kinase regulatory subunit alpha, liver isoform (Phosphorylase kinase alpha L subunit)	PHKA2 PHKLA PYK	PHKA2
14.5396	14.885	14.8039	14.7206	15.0376	14.7557	sp		298	155	14.7937	14.7871	0.00662613	P12235	ADT1_HUMAN	ADP/ATP translocase 1 (ADP,ATP carrier protein 1) (ADP,ATP carrier protein, heart/skeletal muscle isoform T1) (Adenine nucleotide translocator 1) (ANT 1) (Solute carrier family 25 member 4)	SLC25A4 ANT1	SLC25A4
15.6502	15.5185	15.557	15.6506	15.4442	15.4619	sp		551	1243	15.5505	15.5436	0.00682259	Q16630-2	CPSF6_HUMAN	Cleavage and polyadenylation specificity factor subunit 6 (Cleavage and polyadenylation specificity factor 68 kDa subunit) (CPSF 68 kDa subunit) (Cleavage factor Im complex 68 kDa subunit) (CFIm68) (Pre-mRNA cleavage factor Im 68 kDa subunit) (Protein HPBRII-4/7)	CPSF6 CFIM68	CPSF6
14.5838	13.8983	13.9397	14.2177	13.8892	14.276	sp		399	1866	14.1376	14.1307	0.00692844	Q9HB90	RRAGC_HUMAN	Ras-related GTP-binding protein C (Rag C) (RagC) (GTPase-interacting protein 2) (TIB929)	RRAGC	RRAGC
17.3565	16.6563	16.7623	17.1699	16.8228	17.0944	sp		1079	1466	16.9805	16.9736	0.00695229	Q9Y6R1	S4A4_HUMAN	Electrogenic sodium bicarbonate cotransporter 1 (Sodium bicarbonate cotransporter) (Na(+)/HCO3(-) cotransporter) (Solute carrier family 4 member 4) (kNBC1)	SLC4A4 NBC NBC1 NBCE1	SLC4A4
15.8504	16.0403	15.8581	15.8725	16.0219	15.796	sp		372	2251	15.9101	15.9029	0.0071907	P16989	YBOX3_HUMAN	Y-box-binding protein 3 (Cold shock domain-containing protein A) (DNA-binding protein A) (Single-strand DNA-binding protein NF-GMB)	YBX3 CSDA DBPA	YBX3
18.1154	18.1048	18.1059	18.1311	18.1749	18.138	sp		778	148	18.1321	18.1246	0.0074482	O14639-6	ABLM1_HUMAN	Actin-binding LIM protein 1 (abLIM-1) (Actin-binding LIM protein family member 1) (Actin-binding double zinc finger protein) (LIMAB1) (Limatin)	ABLIM1 ABLIM KIAA0059 LIMAB1	ABLIM1
13.4325	14.9194	14.7481	12.7475	14.2302	14.7213	sp		303	2597	14.137	14.1294	0.00756168	Q9UBR2	CATZ_HUMAN	Cathepsin Z (EC 3.4.18.1) (Cathepsin P) (Cathepsin X)	CTSZ	CTSZ
16.0968	16.007	16.0272	15.7513	15.8268	16.1695	sp		244	1953	15.9836	15.9759	0.00765896	P09417	DHPR_HUMAN	Dihydropteridine reductase (EC 1.5.1.34) (HDHPR) (Quinoid dihydropteridine reductase) (Short chain dehydrogenase/reductase family 33C member 1)	QDPR DHPR SDR33C1	QDPR
17.2784	17.478	17.5356	17.359	17.4716	17.4255	sp		751	518	17.4285	17.4208	0.00770569	Q96RP9	EFGM_HUMAN	Elongation factor G, mitochondrial (EF-Gmt) (Elongation factor G 1, mitochondrial) (mEF-G 1) (Elongation factor G1) (hEFG1)	GFM1 EFG EFG1 GFM	GFM1
15.6715	15.61	14.8483	15.3062	16.0334	15.6135	tr		460	819	15.5177	15.5099	0.00783825	E9PFW3	E9PFW3_HUMAN	AP-2 complex subunit mu	AP2M1	AP2M1
15.5655	15.9174	15.9056	15.5532	15.7263	15.7029	tr		190	2117	15.7325	15.7245	0.00797081	H0YJV7	H0YJV7_HUMAN	Transcriptional repressor protein YY1 (Fragment)	YY1	YY1
18.0873	18.1612	18.1421	18.0933	18.1923	18.1425	sp		212	703	18.1405	18.1323	0.00820541	P61019	RAB2A_HUMAN	Ras-related protein Rab-2A	RAB2A RAB2	RAB2A
15.6289	15.6796	15.4503	15.5779	15.5718	15.367	tr		609	1012	15.5503	15.5415	0.00886917	G3V3H3	G3V3H3_HUMAN	Kinesin light chain 1	KLC1	KLC1
16.4102	16.2229	16.284	16.4901	16.5431	16.4967	sp		297	1349	16.4124	16.4032	0.00919342	Q12846	STX4_HUMAN	Syntaxin-4 (Renal carcinoma antigen NY-REN-31)	STX4 STX4A	STX4
15.6415	16.9688	16.6239	16.1503	16.7467	15.8652	sp		181	1876	16.3374	16.3281	0.00927162	Q13442	HAP28_HUMAN	28 kDa heat- and acid-stable phosphoprotein (PDGF-associated protein) (PAP) (PDGFA-associated protein 1) (PAP1)	PDAP1 HASPP28	PDAP1
14.052	13.9051	13.9581	14.4758	14.3021	13.9025	sp		417	2158	14.104	14.0945	0.00959015	P15151-3	PVR_HUMAN	Poliovirus receptor (Nectin-like protein 5) (NECL-5) (CD antigen CD155)	PVR PVS	PVR
17.3056	17.1307	17.3427	17.1257	16.9349	17.2978	sp		2365	286	17.1944	17.1847	0.00968933	Q9H2D6-2	TARA_HUMAN	TRIO and F-actin-binding protein (Protein Tara) (Trio-associated repeat on actin)	TRIOBP KIAA1662 TARA HRIHFB2122	TRIOBP
16.9557	16.9235	16.9419	16.9891	17.0336	16.9895	sp		321	752	16.9771	16.9674	0.00971031	P22087	FBRL_HUMAN	rRNA 2'-O-methyltransferase fibrillarin (EC 2.1.1.-) (34 kDa nucleolar scleroderma antigen) (Histone-glutamine methyltransferase)	FBL FIB1 FLRN	FBL
14.2216	14.0047	14.1902	14.1235	14.2545	14.5076	sp		561	2571	14.2221	14.2119	0.0101795	P08243	ASNS_HUMAN	Asparagine synthetase [glutamine-hydrolyzing] (EC 6.3.5.4) (Cell cycle control protein TS11) (Glutamine-dependent asparagine synthetase)	ASNS TS11	ASNS
18.0277	17.9252	17.8982	17.9559	17.8753	17.8894	tr		1180	638	17.9337	17.9235	0.0102406	C9JFV4	C9JFV4_HUMAN	Proline-, glutamic acid- and leucine-rich protein 1	PELP1	PELP1
18.8924	18.8964	18.916	18.9579	18.9611	18.8787	sp		421	364	18.9232	18.911	0.0122013	P09543	CN37_HUMAN	2',3'-cyclic-nucleotide 3'-phosphodiesterase (CNP) (CNPase) (EC 3.1.4.37)	CNP	CNP
17.948	18.0126	17.9279	17.9302	18.0361	17.9325	sp		305	1644	17.9707	17.9584	0.0122204	Q13151	ROA0_HUMAN	Heterogeneous nuclear ribonucleoprotein A0 (hnRNP A0)	HNRNPA0 HNRPA0	HNRNPA0
20.3935	20.4435	20.405	20.2944	20.4261	20.4462	sp		364	158	20.4082	20.3947	0.0135269	P04075	ALDOA_HUMAN	Fructose-bisphosphate aldolase A (EC 4.1.2.13) (Lung cancer antigen NY-LU-1) (Muscle-type aldolase)	ALDOA ALDA	ALDOA
15.9658	15.9059	15.816	15.7804	15.9068	15.9608	tr		96	2613	15.8962	15.8824	0.0138178	C9JBY7	C9JBY7_HUMAN	28S ribosomal protein S33, mitochondrial	MRPS33	MRPS33
13.3993	13.5684	13.8167	14.6839	13.246	12.1677	sp		613	2363	13.4873	13.4733	0.0139933	Q9UJY4	GGA2_HUMAN	ADP-ribosylation factor-binding protein GGA2 (Gamma-adaptin-related protein 2) (Golgi-localized, gamma ear-containing, ARF-binding protein 2) (VHS domain and ear domain of gamma-adaptin) (Vear)	GGA2 KIAA1080	GGA2
16.4896	16.3522	16.3935	16.4648	16.3824	16.4046	sp		575	1021	16.4218	16.4072	0.0146275	O95817	BAG3_HUMAN	BAG family molecular chaperone regulator 3 (BAG-3) (Bcl-2-associated athanogene 3) (Bcl-2-binding protein Bis) (Docking protein CAIR-1)	BAG3 BIS	BAG3
19.7177	19.6828	19.6552	19.681	19.7017	19.6662	sp		531	200	19.6915	19.6767	0.0148678	P40227	TCPZ_HUMAN	T-complex protein 1 subunit zeta (TCP-1-zeta) (Acute morphine dependence-related protein 2) (CCT-zeta-1) (HTR3) (Tcp20)	CCT6A CCT6 CCTZ	CCT6A
18.2648	18.3033	18.166	18.192	18.3644	18.2552	tr		1768	108	18.2651	18.2502	0.0148773	G3V1L9	G3V1L9_HUMAN	Tight junction protein 1 (Zona occludens 1), isoform CRA_a (Tight junction protein ZO-1)	TJP1 hCG_27621	TJP1
19.3398	19.3387	19.3346	19.3256	19.3416	19.307	sp		609	167	19.3387	19.3237	0.0149422	P12956	XRCC6_HUMAN	X-ray repair cross-complementing protein 6 (EC 3.6.4.-) (EC 4.2.99.-) (5'-deoxyribose-5-phosphate lyase Ku70) (5'-dRP lyase Ku70) (70 kDa subunit of Ku antigen) (ATP-dependent DNA helicase 2 subunit 1) (ATP-dependent DNA helicase II 70 kDa subunit) (CTC box-binding factor 75 kDa subunit) (CTC75) (CTCBF) (DNA repair protein XRCC6) (Lupus Ku autoantigen protein p70) (Ku70) (Thyroid-lupus autoantige…	XRCC6 G22P1	XRCC6
18.3111	18.2702	18.1061	18.2504	18.2864	18.1379	tr		234	1281	18.2345	18.2195	0.0150299	A0A024RA52	A0A024RA52_HUMAN	Proteasome subunit alpha type (EC 3.4.25.1)	PSMA2 hCG_19883	PSMA2
18.5187	18.5789	18.5737	18.5172	18.552	18.5025	sp		69	2632	18.5482	18.5329	0.0152855	P62857	RS28_HUMAN	40S ribosomal protein S28 (Small ribosomal subunit protein eS28)	RPS28	RPS28
21.0111	20.987	20.987	20.9818	21.0201	21.002	sp		427	302	21.006	20.9903	0.0157299	P36578	RL4_HUMAN	60S ribosomal protein L4 (60S ribosomal protein L1) (Large ribosomal subunit protein uL4)	RPL4 RPL1	RPL4
15.9409	16.0378	15.7024	15.6455	16.1667	16.0787	tr		1937	152	15.9366	15.9207	0.0159874	A0A0C4DGG9	A0A0C4DGG9_HUMAN	Chromodomain-helicase-DNA-binding protein 4	CHD4	CHD4
20.724	20.721	20.7316	20.7246	20.74	20.7017	sp		613	171	20.7319	20.7158	0.0160961	O95831	AIFM1_HUMAN	Apoptosis-inducing factor 1, mitochondrial (EC 1.1.1.-) (Programmed cell death protein 8)	AIFM1 AIF PDCD8	AIFM1
16.0396	15.9113	15.8319	15.866	15.8417	15.8876	sp		172	1414	15.9044	15.8883	0.0161152	P24844	MYL9_HUMAN	Myosin regulatory light polypeptide 9 (20 kDa myosin light chain) (LC20) (MLC-2C) (Myosin RLC) (Myosin regulatory light chain 2, smooth muscle isoform) (Myosin regulatory light chain 9) (Myosin regulatory light chain MRLC1)	MYL9 MLC2 MRLC1 MYRL2	MYL9
16.1141	15.6061	15.3438	16.2293	16.3643	15.9385	sp		499	1804	15.9407	15.9246	0.0161247	P15170	ERF3A_HUMAN	Eukaryotic peptide chain release factor GTP-binding subunit ERF3A (Eukaryotic peptide chain release factor subunit 3a) (eRF3a) (G1 to S phase transition protein 1 homolog)	GSPT1 ERF3A	GSPT1
12.1535	11.6841	12.9686	13.4201	13.365	13.3344	sp		373	2583	12.829	12.8129	0.0161343	P53367	ARFP1_HUMAN	Arfaptin-1 (ADP-ribosylation factor-interacting protein 1)	ARFIP1	ARFIP1
17.2909	17.1712	17.3546	17.0362	16.6806	17.0696	sp		1094	1055	17.1087	17.0923	0.0163383	P53992	SC24C_HUMAN	Protein transport protein Sec24C (SEC24-related protein C)	SEC24C KIAA0079	SEC24C
16.7207	17.0279	17.0137	16.9754	16.9068	16.5876	sp		1129	433	16.8804	16.8636	0.0167294	Q92900	RENT1_HUMAN	Regulator of nonsense transcripts 1 (EC 3.6.4.-) (ATP-dependent helicase RENT1) (Nonsense mRNA reducing factor 1) (NORF1) (Up-frameshift suppressor 1 homolog) (hUpf1)	UPF1 KIAA0221 RENT1	UPF1
14.6258	14.8356	14.751	14.4351	14.717	14.7722	tr		198	2041	14.6979	14.681	0.0169716	F8VVA7	F8VVA7_HUMAN	Coatomer subunit zeta-1	COPZ1	COPZ1
17.6055	17.5432	17.6303	17.6969	17.691	17.6357	sp		579	734	17.6423	17.6253	0.0170231	O00425	IF2B3_HUMAN	Insulin-like growth factor 2 mRNA-binding protein 3 (IGF2 mRNA-binding protein 3) (IMP-3) (IGF-II mRNA-binding protein 3) (KH domain-containing protein overexpressed in cancer) (hKOC) (VICKZ family member 3)	IGF2BP3 IMP3 KOC1 VICKZ3	IGF2BP3
17.5988	17.5004	17.4982	17.5751	17.5881	17.5579	sp		689	552	17.5617	17.5445	0.0172253	Q96EY7	PTCD3_HUMAN	Pentatricopeptide repeat domain-containing protein 3, mitochondrial (28S ribosomal protein S39, mitochondrial) (MRP-S39) (Mitochondrial small ribosomal subunit protein mS39) (Transformation-related gene 15 protein) (TRG-15)	PTCD3 MRPS39 TRG15	PTCD3
16.6817	16.5194	16.4443	16.4138	16.2717	16.4094	sp		332	1560	16.4659	16.4475	0.018362	Q9H9J2	RM44_HUMAN	39S ribosomal protein L44, mitochondrial (L44mt) (MRP-L44) (EC 3.1.26.-) (Mitochondrial large ribosomal subunit protein mL44)	MRPL44	MRPL44
14.9958	14.9958	15.5586	15.5012	15.0795	15.08	tr		1088	313	15.2113	15.1923	0.0189829	E7ESC6	E7ESC6_HUMAN	Exportin-7	XPO7	XPO7
15.048	15.0862	15.495	15.5713	15.1853	15.0118	sp		318	1142	15.2428	15.2231	0.0196543	P60891	PRPS1_HUMAN	Ribose-phosphate pyrophosphokinase 1 (EC 2.7.6.1) (PPRibP) (Phosphoribosyl pyrophosphate synthase I) (PRS-I)	PRPS1	PRPS1
17.7123	17.5832	17.672	17.6564	17.5409	17.6245	sp		358	1393	17.6417	17.6214	0.0203648	Q9UBS4	DJB11_HUMAN	DnaJ homolog subfamily B member 11 (APOBEC1-binding protein 2) (ABBP-2) (DnaJ protein homolog 9) (ER-associated DNAJ) (ER-associated Hsp40 co-chaperone) (Endoplasmic reticulum DNA J domain-containing protein 3) (ER-resident protein ERdj3) (ERdj3) (ERj3p) (HEDJ) (Human DnaJ protein 9) (hDj-9) (PWP1-interacting protein 4)	DNAJB11 EDJ ERJ3 HDJ9 PSEC0121 UNQ537/PRO1080	DNAJB11
15.4723	15.5387	15.5288	15.6992	15.6317	15.3325	sp		313	2229	15.5443	15.5235	0.0208006	Q7L523	RRAGA_HUMAN	Ras-related GTP-binding protein A (Rag A) (RagA) (Adenovirus E3 14.7 kDa-interacting protein 1) (FIP-1)	RRAGA	RRAGA
16.8692	16.7921	16.8812	16.7429	16.7118	16.8646	sp		456	492	16.8207	16.7999	0.0208607	O00232	PSD12_HUMAN	26S proteasome non-ATPase regulatory subunit 12 (26S proteasome regulatory subunit RPN5) (26S proteasome regulatory subunit p55)	PSMD12	PSMD12
16.4839	16.563	16.4716	16.5902	16.6075	16.3471	sp		328	1516	16.521	16.5001	0.0209503	Q96DH6	MSI2H_HUMAN	RNA-binding protein Musashi homolog 2 (Musashi-2)	MSI2	MSI2
19.7144	19.6576	19.642	19.6436	19.6805	19.6722	sp		218	832	19.679	19.6578	0.021204	P10301	RRAS_HUMAN	Ras-related protein R-Ras (p23)	RRAS	RRAS
14.3423	14.1173	14.4736	14.3279	13.936	14.2424	sp		NaN	141	14.2506	14.2292	0.0214224	Q8WZ42-6	TITIN_HUMAN
17.9705	17.8854	18.0929	18.2758	18.074	17.9106	sp		541	382	18.0458	18.0239	0.0218983	Q9H223	EHD4_HUMAN	EH domain-containing protein 4 (Hepatocellular carcinoma-associated protein 10/11) (PAST homolog 4)	EHD4 HCA10 HCA11 PAST4 FKSG7	EHD4
16.0889	16.0905	16.0411	15.995	16.1197	16.098	tr		1056	1094	16.0832	16.0611	0.0220871	A0A087WW77	A0A087WW77_HUMAN	Lethal(2) giant larvae protein homolog 1	LLGL1	LLGL1
16.9937	16.9958	17.0919	16.8894	16.8032	16.9365	sp		606	1290	16.9629	16.9406	0.0223541	Q9UNF1	MAGD2_HUMAN	Melanoma-associated antigen D2 (11B6) (Breast cancer-associated gene 1 protein) (BCG-1) (Hepatocellular carcinoma-associated protein JCL-1) (MAGE-D2 antigen)	MAGED2 BCG1	MAGED2
18.3972	18.1871	18.3297	18.334	18.2298	18.3669	sp		452	485	18.3189	18.296	0.0229168	O43615	TIM44_HUMAN	Mitochondrial import inner membrane translocase subunit TIM44	TIMM44 MIMT44 TIM44	TIMM44
19.6564	19.6076	19.5773	19.6196	19.6588	19.5965	tr		938	127	19.6308	19.6079	0.0229206	C9JZR2	C9JZR2_HUMAN	Catenin delta-1	CTNND1	CTNND1
17.5799	17.5798	17.6155	17.5516	17.6374	17.6316	sp		58	2211	17.6109	17.5877	0.023262	Q96IX5	USMG5_HUMAN	ATP synthase membrane subunit DAPIT, mitochondrial (Diabetes-associated protein in insulin-sensitive tissues) (HCV F-transactivated protein 2) (Up-regulated during skeletal muscle growth protein 5)	ATP5MD DAPIT HCVFTP2 USMG5 PD04912	ATP5MD
17.535	17.3851	17.9301	17.9224	17.8757	17.9627	sp		550	678	17.7803	17.7568	0.0235004	Q14247	SRC8_HUMAN	Src substrate cortactin (Amplaxin) (Oncogene EMS1)	CTTN EMS1	CTTN
18.5083	18.5074	18.4977	18.5702	18.5156	18.3722	sp		589	443	18.5072	18.4833	0.023901	P14866	HNRPL_HUMAN	Heterogeneous nuclear ribonucleoprotein L (hnRNP L)	HNRNPL HNRPL P/OKcl.14	HNRNPL
17.8128	17.7424	17.172	17.3531	17.8013	17.6188	sp		594	353	17.5954	17.5715	0.0239182	O00567	NOP56_HUMAN	Nucleolar protein 56 (Nucleolar protein 5A)	NOP56 NOL5A	NOP56
16.5321	16.5671	16.5466	16.5492	16.554	16.4444	tr		234	1924	16.5442	16.5202	0.0240211	Q5SRQ6	Q5SRQ6_HUMAN	Casein kinase II subunit beta (CK II beta)	CSNK2B hCG_43725	CSNK2B
14.8875	14.9669	15.0283	14.8715	15.1007	15.1057	sp		709	1265	15.0055	14.9814	0.0241642	Q14444	CAPR1_HUMAN	Caprin-1 (Cell cycle-associated protein 1) (Cytoplasmic activation- and proliferation-associated protein 1) (GPI-anchored membrane protein 1) (GPI-anchored protein p137) (GPI-p137) (p137GPI) (Membrane component chromosome 11 surface marker 1) (RNA granule protein 105)	CAPRIN1 GPIAP1 GPIP137 M11S1 RNG105	CAPRIN1
16.6792	16.6294	16.5467	16.7113	16.8036	16.6158	sp		217	2440	16.6765	16.6522	0.0243397	P06730-3	IF4E_HUMAN	Eukaryotic translation initiation factor 4E (eIF-4E) (eIF4E) (eIF-4F 25 kDa subunit) (mRNA cap-binding protein)	EIF4E EIF4EL1 EIF4F	EIF4E
16.2986	16.6938	16.3567	15.8736	16.4831	16.4957	sp		292	1520	16.3795	16.3544	0.0250759	Q9H019	MFR1L_HUMAN	Mitochondrial fission regulator 1-like	MTFR1L FAM54B HYST1888 MSTP116	MTFR1L
20.3315	20.3031	20.4081	20.3741	20.3535	20.3392	sp		288	562	20.3643	20.3388	0.0255527	Q02878	RL6_HUMAN	60S ribosomal protein L6 (Large ribosomal subunit protein eL6) (Neoplasm-related protein C140) (Tax-responsive enhancer element-binding protein 107) (TaxREB107)	RPL6 TXREB1	RPL6
16.6958	16.7512	16.7043	16.5806	16.7756	16.7667	sp		308	696	16.7252	16.6995	0.0257092	Q9NZ01	TECR_HUMAN	Very-long-chain enoyl-CoA reductase (EC 1.3.1.93) (Synaptic glycoprotein SC2) (Trans-2,3-enoyl-CoA reductase) (TER)	TECR GPSN2 SC2	TECR
17.9528	18.0472	18.0773	18.2455	18.0003	17.6593	tr		128	1729	18.0101	17.984	0.0261154	A0A0C4DGS0	A0A0C4DGS0_HUMAN	NADH dehydrogenase [ubiquinone] 1 alpha subcomplex subunit 6	NDUFA6	NDUFA6
23.2213	23.2058	23.2113	23.1915	23.2694	23.2259	sp		529	95	23.234	23.2077	0.0262966	P06576	ATPB_HUMAN	ATP synthase subunit beta, mitochondrial (EC 7.1.2.2) (ATP synthase F1 subunit beta)	ATP5F1B ATP5B ATPMB ATPSB	ATP5F1B
19.2356	19.2095	19.2276	19.1997	19.217	19.192	sp		135	1490	19.2267	19.2004	0.026329	Q8N5K1	CISD2_HUMAN	CDGSH iron-sulfur domain-containing protein 2 (Endoplasmic reticulum intermembrane small protein) (MitoNEET-related 1 protein) (Miner1) (Nutrient-deprivation autophagy factor-1) (NAF-1)	CISD2 CDGSH2 ERIS ZCD2	CISD2
19.0174	18.901	18.8629	19.0744	19.0581	18.8826	sp		740	248	18.9794	18.9526	0.026804	Q92499	DDX1_HUMAN	ATP-dependent RNA helicase DDX1 (EC 3.6.4.13) (DEAD box protein 1) (DEAD box protein retinoblastoma) (DBP-RB)	DDX1	DDX1
16.3535	16.215	16.3919	16.4165	16.3271	16.3599	sp		105	2014	16.3575	16.3304	0.0270443	P10599	THIO_HUMAN	Thioredoxin (Trx) (ATL-derived factor) (ADF) (Surface-associated sulphydryl protein) (SASP)	TXN TRDX TRX TRX1	TXN
15.8409	15.9037	15.9424	15.8857	15.7439	15.6567	sp		204	1653	15.8424	15.8153	0.0270977	P52565	GDIR1_HUMAN	Rho GDP-dissociation inhibitor 1 (Rho GDI 1) (Rho-GDI alpha)	ARHGDIA GDIA1	ARHGDIA
18.9212	18.6283	19.4516	19.4591	18.6992	18.9007	sp		706	295	19.024	18.996	0.0279884	Q9UEY8-2	ADDG_HUMAN	Gamma-adducin (Adducin-like protein 70)	ADD3 ADDL	ADD3
17.8125	17.5638	17.3025	17.7594	17.9465	17.6543	sp		295	543	17.6872	17.6591	0.0280151	P54920	SNAA_HUMAN	Alpha-soluble NSF attachment protein (SNAP-alpha) (N-ethylmaleimide-sensitive factor attachment protein alpha)	NAPA SNAPA	NAPA
16.8674	16.8301	16.8326	16.9172	16.9684	16.8332	sp		297	1690	16.8894	16.8602	0.0292835	Q15006	EMC2_HUMAN	ER membrane protein complex subunit 2 (Tetratricopeptide repeat protein 35) (TPR repeat protein 35)	EMC2 KIAA0103 TTC35	EMC2
14.38	14.3622	14.4875	14.1491	14.3186	14.585	sp		674	2330	14.3954	14.3654	0.0299253	Q9BTX1	NDC1_HUMAN	Nucleoporin NDC1 (hNDC1) (Transmembrane protein 48)	NDC1 TMEM48	NDC1
18.2583	18.1711	18.2216	18.2025	18.1984	18.2143	sp		389	1192	18.2261	18.196	0.0301533	Q9NZJ7	MTCH1_HUMAN	Mitochondrial carrier homolog 1 (Presenilin-associated protein)	MTCH1 PSAP CGI-64 UNQ1871/PRO4314	MTCH1
17.7685	17.9349	17.8087	17.868	17.7539	17.4359	sp		418	741	17.777	17.7463	0.0307751	P61158	ARP3_HUMAN	Actin-related protein 3 (Actin-like protein 3)	ACTR3 ARP3	ACTR3
15.1235	15.1564	15.3159	15.347	15.4265	15.2698	sp		268	1821	15.2886	15.2577	0.0308933	P53701	CCHL_HUMAN	Cytochrome c-type heme lyase (CCHL) (EC 4.4.1.17) (Holocytochrome c-type synthase)	HCCS CCHL	HCCS
14.4422	13.585	14.0284	14.2675	13.6402	14.1653	tr		580	2358	14.0369	14.0059	0.0310431	A0A0X1KG71	A0A0X1KG71_HUMAN	Negative elongation factor B (NELF-B) (Cofactor of BRCA1)	NELFB COBRA1 KIAA1182	NELFB
19.2101	19.1782	19.2417	19.2319	19.2471	19.1954	sp		243	2055	19.233	19.2019	0.0311394	Q9BVC6	TM109_HUMAN	Transmembrane protein 109 (Mitsugumin-23) (Mg23)	TMEM109	TMEM109
11.4384	14.3703	13.51	14.145	13.255	9.59354	tr		261	1913	12.7345	12.7029	0.0315514	H0YF29	H0YF29_HUMAN	UPF0598 protein C8orf82 (Fragment)	C8orf82	C8orf82
14.2495	14.0955	14.252	14.0911	14.1318	14.3495	sp		722	1844	14.2111	14.1787	0.0323963	Q9NZQ3-3	SPN90_HUMAN	NCK-interacting protein with SH3 domain (54 kDa VacA-interacting protein) (54 kDa vimentin-interacting protein) (VIP54) (90 kDa SH3 protein interacting with Nck) (AF3p21) (Dia-interacting protein 1) (DIP-1) (Diaphanous protein-interacting protein) (SH3 adapter protein SPIN90) (WASP-interacting SH3-domain protein) (WISH) (Wiskott-Aldrich syndrome protein-interacting protein)	NCKIPSD AF3P21 SPIN90	NCKIPSD
18.1263	18.1937	18.0923	17.9161	17.9312	17.9424	sp		255	1175	18.05	18.0174	0.0325394	P09661	RU2A_HUMAN	U2 small nuclear ribonucleoprotein A' (U2 snRNP A')	SNRPA1	SNRPA1
13.1686	13.3333	12.8347	13.2335	13.1006	12.4388	sp		3013	2703	13.0347	13.0019	0.0327835	O94915	FRYL_HUMAN	Protein furry homolog-like (ALL1-fused gene from chromosome 4p12 protein)	FRYL AF4P12 KIAA0826	FRYL
13.979	14.193	14.161	13.9637	14.3811	14.2647	sp		186	2558	14.1737	14.1405	0.0332232	O75935	DCTN3_HUMAN	Dynactin subunit 3 (Dynactin complex subunit 22 kDa subunit) (p22)	DCTN3 DCTN22	DCTN3
14.4588	14.4406	14.4009	14.3258	14.324	14.317	sp		306	2653	14.3946	14.3611	0.0334368	Q9H7B2	RPF2_HUMAN	Ribosome production factor 2 homolog (Brix domain-containing protein 1) (Ribosome biogenesis protein RPF2 homolog)	RPF2 BXDC1	RPF2
[truncated: 1,021 more rows]

## Sheet: 4745 IDs @ 1% FDR
N	Unused	Total	%Cov	%Cov(50)	%Cov(95)	Accession	UniProt_Accession	UniProt_ID	Name	Species	Peptides(95%)
[truncated: 4,745 more rows]

[truncated: 1 more sheets: source_publication]
